# Supplementary material
Source: Research Square preprint supplement (doi:10.21203/rs.3.rs-8825984/v1)
Supplement: Supplementary file 1 [file 1494e603469456f8bab83bc9.xlsx]

## Sheet: whole_Cohort_fisher
Gene	Annotation	resistant_present	sensitive_present	resistant_absent	sensitive_absent	p_value	or_haldane	log2_or	freq_R	freq_S	freq_diff	FDR	significance_fdr	significance_nominal
group_2588	DNA-binding protein;DNA helicase	1	13	54	32	9.46482e-05	0.0662589	-3.91574	0.0181818	0.288889	-0.270707	0.341254	Not significant	Enriched in Sensitive
group_2612	Replication initiation factor;Replication initiation protein;Replication initiation factor family protein	1	13	54	32	9.46482e-05	0.0662589	-3.91574	0.0181818	0.288889	-0.270707	0.341254	Not significant	Enriched in Sensitive
pezA	Antitoxin PezA;DNA-binding helix-turn-helix protein;HTH cro/C1-type domain-containing protein	1	12	54	33	0.000436815	0.0737615	-3.76099	0.0181818	0.266667	-0.248485	0.427078	Not significant	Enriched in Sensitive
group_3070	Major facilitator superfamily (MFS) profile domain-containing protein;Transport protein	16	29	39	16	0.000563482	0.233641	-2.09764	0.290909	0.644444	-0.353535	0.427078	Not significant	Enriched in Sensitive
group_2667	HTH cro/C1-type domain-containing protein;Putative transcriptional regulator;DNA-binding protein;DNA-binding helix-turn-helix protein;DNA-binding transcriptional regulator XRE-family HTH domain	35	41	20	4	0.00185492	0.187775	-2.41292	0.636364	0.911111	-0.274747	0.427078	Not significant	Enriched in Sensitive
group_815	DUF4336 domain-containing protein	10	0	45	45	0.00187396	21	4.39232	0.181818	0	0.181818	0.427078	Not significant	Not significant
group_2604	hypothetical protein;Methyltransferase domain-containing protein;Methyltransferase;class I SAM-dependent methyltransferase;Class I SAM-dependent methyltransferase;Ubiquinone/menaquinone biosynthesis C-methylase UbiE/MenG;Methyltransferase type 11	6	17	49	28	0.00188727	0.213853	-2.22531	0.109091	0.377778	-0.268687	0.427078	Not significant	Enriched in Sensitive
group_2889	ABC transporter substrate-binding protein;Adhesion protein;ABC-type Zn uptake system ZnuABC Zn-binding component ZnuA;Adhesion lipoprotein;High-affinity zinc uptake system binding-protein ZnuA;Metal ABC superfamily ATP binding cassette transporter binding protein;Zinc-binding lipoprotein AdcA putative;zinc-binding lipoprotein AdcAII	32	39	23	6	0.00195963	0.227579	-2.13556	0.581818	0.866667	-0.284848	0.427078	Not significant	Enriched in Sensitive
znuA	Zn/Mn ABC transporter;zinc-binding lipoprotein AdcAII;ABC-type Zn uptake system ZnuABC Zn-binding component ZnuA	1	10	54	35	0.00215537	0.0930537	-3.42579	0.0181818	0.222222	-0.20404	0.427078	Not significant	Enriched in Sensitive
group_1258	SAG1250 family conjugative relaxase;Lantibiotic streptin immunity protein;Lantibiotic streptin immunity protein C-terminal domain-containing protein;Tn5252 relaxase;hypothetical protein;Relaxase/mobilization nuclease family protein;MobA/VirD2-like nuclease domain-containing protein	10	21	45	24	0.00260147	0.26297	-1.92703	0.181818	0.466667	-0.284848	0.427078	Not significant	Enriched in Sensitive
group_20729	NADP-dependent oxidoreductase domain-containing protein;Oxidoreductase aldo/keto reductase family protein;aldo/keto reductase;hypothetical protein	21	5	34	40	0.00264825	4.58893	2.19816	0.381818	0.111111	0.270707	0.427078	Not significant	Enriched in Resistant
group_576	HXXEE domain-containing protein;Membrane protein	15	2	40	43	0.0027239	6.65926	2.73536	0.272727	0.0444444	0.228283	0.427078	Not significant	Enriched in Resistant
group_19122	Site-specific recombinase XerD	0	7	55	38	0.00283489	0.0462462	-4.43452	0	0.155556	-0.155556	0.427078	Not significant	Not significant
group_20513	Phage protein	0	7	55	38	0.00283489	0.0462462	-4.43452	0	0.155556	-0.155556	0.427078	Not significant	Not significant
lptC	LPS export ABC transporter periplasmic protein LptC	0	7	55	38	0.00283489	0.0462462	-4.43452	0	0.155556	-0.155556	0.427078	Not significant	Not significant
group_116	ABC transporter domain-containing protein;ABC transporter ATP-binding protein	22	6	33	39	0.00361176	4.08152	2.0291	0.4	0.133333	0.266667	0.427078	Not significant	Enriched in Resistant
group_123	HTH tetR-type domain-containing protein;hypothetical protein	22	6	33	39	0.00361176	4.08152	2.0291	0.4	0.133333	0.266667	0.427078	Not significant	Enriched in Resistant
group_21574	ABC3 transporter permease protein domain-containing protein	22	6	33	39	0.00361176	4.08152	2.0291	0.4	0.133333	0.266667	0.427078	Not significant	Enriched in Resistant
group_2816	DUF368 domain-containing protein;Integral membrane protein;hypothetical protein	33	39	22	6	0.00361176	0.245007	-2.0291	0.6	0.866667	-0.266667	0.427078	Not significant	Enriched in Sensitive
panT	Pantothenic acid transporter pant;Pantothenic acid transporter PanT;ECF transporter S component;Uncharacterized membrane protein;Thiamine transporter protein (Thia_YuaJ)	33	39	22	6	0.00361176	0.245007	-2.0291	0.6	0.866667	-0.266667	0.427078	Not significant	Enriched in Sensitive
group_20870	Integrative and conjugative element protein	7	17	48	28	0.00466082	0.251841	-1.98942	0.127273	0.377778	-0.250505	0.427078	Not significant	Enriched in Sensitive
group_2510	ATP-binding cassette domain-containing protein;ABC transporter transmembrane domain-containing protein;Putative ABC transporter protein;ABC transporter domain-containing protein;hypothetical protein	7	17	48	28	0.00466082	0.251841	-1.98942	0.127273	0.377778	-0.250505	0.427078	Not significant	Enriched in Sensitive
group_19713	DUF4767 domain-containing protein;Lipoprotein	1	9	54	36	0.00468956	0.105746	-3.24132	0.0181818	0.2	-0.181818	0.427078	Not significant	Not significant
group_21163	Lipoprotein;DUF6287 domain-containing protein	1	9	54	36	0.00468956	0.105746	-3.24132	0.0181818	0.2	-0.181818	0.427078	Not significant	Not significant
metA	homoserine O-succinyltransferase	32	38	23	7	0.00474223	0.269411	-1.89212	0.581818	0.844444	-0.262626	0.427078	Not significant	Enriched in Sensitive
lysA	Diaminopimelate decarboxylase;Diaminopimelate decarboxylase putative	30	37	25	8	0.00510543	0.271111	-1.88304	0.545455	0.822222	-0.276768	0.427078	Not significant	Enriched in Sensitive
group_16500	HTH cro/C1-type domain-containing protein	2	10	53	35	0.00548656	0.157988	-2.66211	0.0363636	0.222222	-0.185859	0.427078	Not significant	Not significant
group_21601	Integrase	4	13	51	32	0.00646806	0.210356	-2.2491	0.0727273	0.288889	-0.216162	0.427078	Not significant	Enriched in Sensitive
dprA	DNA-processing protein DprA	34	39	21	6	0.006519	0.264057	-1.92108	0.618182	0.866667	-0.248485	0.427078	Not significant	Enriched in Sensitive
group_2371	arginine repressor	34	39	21	6	0.006519	0.264057	-1.92108	0.618182	0.866667	-0.248485	0.427078	Not significant	Enriched in Sensitive
group_2838	helicase-exonuclease AddAB subunit AddA;DNA 3'-5' helicase;PD-(D/E)XK nuclease family protein;ATP-dependent helicase/nuclease subunit A;Recombination helicase AddA;UvrD-helicase domain-containing protein;hypothetical protein	34	39	21	6	0.006519	0.264057	-1.92108	0.618182	0.866667	-0.248485	0.427078	Not significant	Enriched in Sensitive
group_2905	Sugar phosphatase YidA;Cof-like hydrolase;Hydroxymethylpyrimidine pyrophosphatase and other HAD family phosphatases;Cof family protein;Putative hydrolase;HAD-IIB family hydrolase;HAD hydrolase family protein	34	39	21	6	0.006519	0.264057	-1.92108	0.618182	0.866667	-0.248485	0.427078	Not significant	Enriched in Sensitive
group_3119	Trk system potassium transporter TrkA	34	39	21	6	0.006519	0.264057	-1.92108	0.618182	0.866667	-0.248485	0.427078	Not significant	Enriched in Sensitive
guaB	IMP dehydrogenase	34	39	21	6	0.006519	0.264057	-1.92108	0.618182	0.866667	-0.248485	0.427078	Not significant	Enriched in Sensitive
holA	DNA polymerase III subunit delta	34	39	21	6	0.006519	0.264057	-1.92108	0.618182	0.866667	-0.248485	0.427078	Not significant	Enriched in Sensitive
niaR	Transcription repressor NiaR;DNA-binding protein;Biotin repressor family transcriptional regulator;HTH deoR-type domain-containing protein;DNA-binding transcriptional regulator;hypothetical protein;Transcriptional regulator of NAD metabolism contains HTH and 3H domains	34	39	21	6	0.006519	0.264057	-1.92108	0.618182	0.866667	-0.248485	0.427078	Not significant	Enriched in Sensitive
pgl	6-phosphogluconolactonase;6-phosphogluconolactonase cycloisomerase 2 family;beta-propeller fold lactonase family protein;3-carboxymuconate cyclase	34	39	21	6	0.006519	0.264057	-1.92108	0.618182	0.866667	-0.248485	0.427078	Not significant	Enriched in Sensitive
ppaX~~~gph	Phosphoglycolate phosphatase;Putative HAD superfamily hydrolase;DNA gyrase subunit B;Hydrolase;Pyrophosphatase PpaX;Phosphoglycolate phosphatase HAD superfamily	34	39	21	6	0.006519	0.264057	-1.92108	0.618182	0.866667	-0.248485	0.427078	Not significant	Enriched in Sensitive
recF	DNA replication/repair protein RecF;DNA replication and repair protein RecF	34	39	21	6	0.006519	0.264057	-1.92108	0.618182	0.866667	-0.248485	0.427078	Not significant	Enriched in Sensitive
trkH~~~trkG	Cation transport protein;TrkH family potassium uptake protein;Cation uptake protein Trk family;Potassium uptake protein Trk family putative;Potassium uptake protein TrkH;Trk-type K+ transport system membrane component	34	39	21	6	0.006519	0.264057	-1.92108	0.618182	0.866667	-0.248485	0.427078	Not significant	Enriched in Sensitive
trmL~~~trmH	Putative tRNA (cytidine(34)-2'-O)-methyltransferase;tRNA (cytidine(34)-2'-O)-methyltransferase;tRNA(Leu) C34 or U34 (ribose-2'-O)-methylase TrmL contains SPOUT domain;TrmH family RNA methyltransferase	34	39	21	6	0.006519	0.264057	-1.92108	0.618182	0.866667	-0.248485	0.427078	Not significant	Enriched in Sensitive
trpS	tryptophan--tRNA ligase	34	39	21	6	0.006519	0.264057	-1.92108	0.618182	0.866667	-0.248485	0.427078	Not significant	Enriched in Sensitive
rpmH	50S ribosomal protein L34;Large ribosomal subunit protein bL34	37	41	18	4	0.00671361	0.219798	-2.18575	0.672727	0.911111	-0.238384	0.427078	Not significant	Enriched in Sensitive
group_1226	hypothetical protein	0	6	55	39	0.0068328	0.0547471	-4.19107	0	0.133333	-0.133333	0.427078	Not significant	Not significant
group_1854	Integrase/recombinase;site-specific integrase;Putative phage integrase	0	6	55	39	0.0068328	0.0547471	-4.19107	0	0.133333	-0.133333	0.427078	Not significant	Not significant
group_208	Phosphatidylglycerophosphatase B;PAP2 (Type 2 phosphatidic acid phosphatase) family protein	0	6	55	39	0.0068328	0.0547471	-4.19107	0	0.133333	-0.133333	0.427078	Not significant	Not significant
group_20829	DNA alkylation repair enzyme;DNA alkylation repair enzyme domain protein;DNA alkylation repair protein	0	6	55	39	0.0068328	0.0547471	-4.19107	0	0.133333	-0.133333	0.427078	Not significant	Not significant
group_1786	Plasmid stabilization system protein;Plasmid stabilization system protein RelE/ParE family;Toxin to DNA-damage-inducible protein J;Addiction module toxin RelE/StbE family;Type II toxin-antitoxin system RelE/ParE family toxin	6	15	49	30	0.00735508	0.25839	-1.95238	0.109091	0.333333	-0.224242	0.427078	Not significant	Enriched in Sensitive
group_1800	RelB antitoxin;DNA-damage-inducible protein J;type II toxin-antitoxin system RelB/DinJ family antitoxin;RelB antitoxin family protein	6	15	49	30	0.00735508	0.25839	-1.95238	0.109091	0.333333	-0.224242	0.427078	Not significant	Enriched in Sensitive
group_2953	ABC transporter ATP-binding protein;Putative ABC transporter ATP-binding protein	6	15	49	30	0.00735508	0.25839	-1.95238	0.109091	0.333333	-0.224242	0.427078	Not significant	Enriched in Sensitive
group_6989	ABC transporter ATP-binding protein;Putative ABC transporter ATP-binding protein	6	15	49	30	0.00735508	0.25839	-1.95238	0.109091	0.333333	-0.224242	0.427078	Not significant	Enriched in Sensitive
group_1218	hypothetical protein;Putative histidine kinase (Sensory transduction protein kinase)	8	0	47	45	0.0077013	16.2842	4.0254	0.145455	0	0.145455	0.427078	Not significant	Not significant
group_19265	DUF2975 domain-containing protein	8	0	47	45	0.0077013	16.2842	4.0254	0.145455	0	0.145455	0.427078	Not significant	Not significant
group_20496	HTH tetR-type domain-containing protein;TetR family transcriptional regulator	8	0	47	45	0.0077013	16.2842	4.0254	0.145455	0	0.145455	0.427078	Not significant	Not significant
group_21141	Chaperone protein DnaK	8	0	47	45	0.0077013	16.2842	4.0254	0.145455	0	0.145455	0.427078	Not significant	Not significant
group_1414	Txe/YoeB family addiction module toxin	30	12	25	33	0.00779212	3.20549	1.68054	0.545455	0.266667	0.278788	0.427078	Not significant	Enriched in Resistant
stbD	Antitoxin;Antitoxin component YafN of the YafNO toxin-antitoxin module PHD/YefM family	30	12	25	33	0.00779212	3.20549	1.68054	0.545455	0.266667	0.278788	0.427078	Not significant	Enriched in Resistant
amyA	alpha-amylase;Cytoplasmic alpha-amylase	33	38	22	7	0.00834014	0.290043	-1.78566	0.6	0.844444	-0.244444	0.427078	Not significant	Enriched in Sensitive
cbpB	cyclic-di-AMP-binding protein CbpB	33	38	22	7	0.00834014	0.290043	-1.78566	0.6	0.844444	-0.244444	0.427078	Not significant	Enriched in Sensitive
group_3103	UPF0154 protein SIR_0372;Conserved uncharacterized protein;Family protein;UPF0154 protein SPN23F18950;UPF0154 protein	33	38	22	7	0.00834014	0.290043	-1.78566	0.6	0.844444	-0.244444	0.427078	Not significant	Enriched in Sensitive
group_3106	Phosphoesterase;putative phosphodiesterase calcineurin family	33	38	22	7	0.00834014	0.290043	-1.78566	0.6	0.844444	-0.244444	0.427078	Not significant	Enriched in Sensitive
group_3114	Pseudouridylate synthase RsuA specific for 16S rRNA U516 and 23S rRNA U2605	33	38	22	7	0.00834014	0.290043	-1.78566	0.6	0.844444	-0.244444	0.427078	Not significant	Enriched in Sensitive
lytR~~~cps2a	Cell envelope-related transcriptional attenuator domain-containing protein;Biofilm regulatory protein A;Nucleoside diphosphate kinase;LytR family transcriptional regulator;Anionic cell wall polymer biosynthesis enzyme TagV/TagU LytR-Cps2A-Psr (LCP) family (peptidoglycan teichoic acid transferase);Cell envelope-associated transcriptional attenuator LytR-CpsA-Psr subfamily F2;hypothetical protein	33	38	22	7	0.00834014	0.290043	-1.78566	0.6	0.844444	-0.244444	0.427078	Not significant	Enriched in Sensitive
racE	glutamate racemase;Glutamate racemase	33	38	22	7	0.00834014	0.290043	-1.78566	0.6	0.844444	-0.244444	0.427078	Not significant	Enriched in Sensitive
scpA	segregation/condensation protein A	33	38	22	7	0.00834014	0.290043	-1.78566	0.6	0.844444	-0.244444	0.427078	Not significant	Enriched in Sensitive
scpB	SMC-Scp complex subunit ScpB;Segregation and condensation protein B	33	38	22	7	0.00834014	0.290043	-1.78566	0.6	0.844444	-0.244444	0.427078	Not significant	Enriched in Sensitive
group_2654	NADPH-dependent FMN reductase-like domain-containing protein;Uncharacterized conserved protein AF0170 contains SAB hemerythrin HHE and PAS domains;Oxidoreductase;hypothetical protein;NADPH azoreductase	40	42	15	3	0.00875626	0.21518	-2.21638	0.727273	0.933333	-0.206061	0.427078	Not significant	Enriched in Sensitive
group_20844	Pantothenic acid transporter pant;Pantothenic acid transporter PanT;Thiamine transporter protein (Thia_YuaJ)	15	3	40	42	0.00875626	4.64727	2.21638	0.272727	0.0666667	0.206061	0.427078	Not significant	Enriched in Resistant
group_2978	ryptide export MFS transporter;MFS transporter;Transporter major facilitator family protein	15	3	40	42	0.00875626	4.64727	2.21638	0.272727	0.0666667	0.206061	0.427078	Not significant	Enriched in Resistant
lmrB	Lincomycin resistance protein lmrB;Major facilitator superfamily (MFS) profile domain-containing protein	15	3	40	42	0.00875626	4.64727	2.21638	0.272727	0.0666667	0.206061	0.427078	Not significant	Enriched in Resistant
yfdV	putative permease AEC (auxin efflux carrier) family;Transporter auxin efflux carrier family protein;Auxin efflux carrier;AEC family transporter;hypothetical protein;Malate permease	19	5	36	40	0.0089578	3.934	1.976	0.345455	0.111111	0.234343	0.427078	Not significant	Enriched in Resistant
glnQ~~~artM	ABC-type polar amino acid transport system ATPase component;ABC transporter domain-containing protein;Amino acid ABC transporter ATP-binding protein;Arginine transport ATP-binding protein ArtM;ATP-binding cassette domain-containing protein;Polar amino acid transport system ATP-binding protein	42	43	13	2	0.00993508	0.180928	-2.46651	0.763636	0.955556	-0.191919	0.427078	Not significant	Not significant
group_21611	Fic family protein;Putative adenosine monophosphate-protein transferase fic	13	2	42	43	0.00993508	5.52706	2.46651	0.236364	0.0444444	0.191919	0.427078	Not significant	Not significant
group_2379	Mobile element protein;Transposase IS204/IS1001/IS1096/IS1165 DDE domain-containing protein;ISL3 family transposase;transposase;Putative IS1167 transposase;Transposase IS204/IS1001/IS1096/IS1165 zinc-finger domain-containing protein;IS1167 transposase;transposase family protein;Transposase;Insertion element protein	11	20	44	25	0.0100228	0.321458	-1.6373	0.2	0.444444	-0.244444	0.427078	Not significant	Enriched in Sensitive
group_17199	hypothetical protein	1	8	54	37	0.0100408	0.121425	-3.04187	0.0181818	0.177778	-0.159596	0.427078	Not significant	Not significant
group_19096	Transposase and inactivated derivatives	1	8	54	37	0.0100408	0.121425	-3.04187	0.0181818	0.177778	-0.159596	0.427078	Not significant	Not significant
group_2555	Phage integrase family site specific recombinase;Tyr recombinase domain-containing protein;Integrase;Site-specific recombinase phage integrase family	1	8	54	37	0.0100408	0.121425	-3.04187	0.0181818	0.177778	-0.159596	0.427078	Not significant	Not significant
group_4063	Phage protein	1	8	54	37	0.0100408	0.121425	-3.04187	0.0181818	0.177778	-0.159596	0.427078	Not significant	Not significant
group_615	hypothetical protein	1	8	54	37	0.0100408	0.121425	-3.04187	0.0181818	0.177778	-0.159596	0.427078	Not significant	Not significant
mobV	MobV family relaxase	1	8	54	37	0.0100408	0.121425	-3.04187	0.0181818	0.177778	-0.159596	0.427078	Not significant	Not significant
gpmB2	23-bisphosphoglycerate-dependent phosphoglycerate mutase;putative phosphoglycerate mutase GpmB2;Phosphoglycerate mutase;histidine phosphatase family protein;Putative phosphoglycerate mutase	8	17	47	28	0.010462	0.291429	-1.77879	0.145455	0.377778	-0.232323	0.427078	Not significant	Enriched in Sensitive
group_21081	DNA primase;Toprim domain-containing protein	8	17	47	28	0.010462	0.291429	-1.77879	0.145455	0.377778	-0.232323	0.427078	Not significant	Enriched in Sensitive
group_20528	Integral membrane protein	11	1	44	44	0.0106125	7.66667	2.9386	0.2	0.0222222	0.177778	0.427078	Not significant	Not significant
group_2664	Coenzyme A disulfide reductase;Pyridine nucleotide-disulfide oxidoreductase	13	22	42	23	0.011441	0.331765	-1.59177	0.236364	0.488889	-0.252525	0.427078	Not significant	Enriched in Sensitive
group_18064	hypothetical protein	2	9	53	36	0.0114469	0.179538	-2.47764	0.0363636	0.2	-0.163636	0.427078	Not significant	Not significant
group_19589	STAS domain-containing protein	2	9	53	36	0.0114469	0.179538	-2.47764	0.0363636	0.2	-0.163636	0.427078	Not significant	Not significant
group_2356	Flavoprotein;NAD(P)/FAD-dependent oxidoreductase;Flavoprotein family protein;NAD(FAD)-utilizing dehydrogenases;Dihydrolipoamide dehydrogenase;putative flavoprotein YhiN	35	39	20	6	0.0115147	0.284964	-1.81115	0.636364	0.866667	-0.230303	0.427078	Not significant	Enriched in Sensitive
skfE~~~ccmA	SkfA peptide export ATP-binding protein SkfE;ABC-type multidrug transport system ATPase component;ABC transporter ATP-binding protein;ABC transporter domain-containing protein	35	39	20	6	0.0115147	0.284964	-1.81115	0.636364	0.866667	-0.230303	0.427078	Not significant	Enriched in Sensitive
group_21299	HTH cro/C1-type domain-containing protein	17	4	38	41	0.0123352	4.19192	2.06761	0.309091	0.0888889	0.220202	0.427078	Not significant	Enriched in Resistant
group_21362	Aspartyl-tRNA synthetase;Preprotein translocase YajC subunit	17	4	38	41	0.0123352	4.19192	2.06761	0.309091	0.0888889	0.220202	0.427078	Not significant	Enriched in Resistant
group_15694	DUF3173 domain-containing protein	4	12	51	33	0.0125323	0.234175	-2.09434	0.0727273	0.266667	-0.193939	0.427078	Not significant	Not significant
carA	carbamoyl phosphate synthase small subunit	34	38	21	7	0.0143546	0.312594	-1.67764	0.618182	0.844444	-0.226263	0.427078	Not significant	Enriched in Sensitive
def	peptide deformylase;hypothetical protein;Peptide deformylase	34	38	21	7	0.0143546	0.312594	-1.67764	0.618182	0.844444	-0.226263	0.427078	Not significant	Enriched in Sensitive
eamA~~~yicL	Drug/metabolite transporter (DMT) superfamily protein;Membrane protein;EamA domain-containing protein;Putative inner membrane transporter YicL	34	38	21	7	0.0143546	0.312594	-1.67764	0.618182	0.844444	-0.226263	0.427078	Not significant	Enriched in Sensitive
group_2168	carbamoyl-phosphate synthase large subunit;ATP-grasp domain-containing protein	34	38	21	7	0.0143546	0.312594	-1.67764	0.618182	0.844444	-0.226263	0.427078	Not significant	Enriched in Sensitive
group_2276	prephenate dehydratase;Prephenate dehydratase	34	38	21	7	0.0143546	0.312594	-1.67764	0.618182	0.844444	-0.226263	0.427078	Not significant	Enriched in Sensitive
bioH	Alpha/beta hydrolase;3-oxoadipate enol-lactonase 2;Carboxylesterase bioH (Biotin synthesis protein bioH)	7	0	48	45	0.0155119	14.0722	3.81477	0.127273	0	0.127273	0.427078	Not significant	Not significant
fasA	Response regulator FasA	7	0	48	45	0.0155119	14.0722	3.81477	0.127273	0	0.127273	0.427078	Not significant	Not significant
group_12699	ArsR family transcriptional regulator	7	0	48	45	0.0155119	14.0722	3.81477	0.127273	0	0.127273	0.427078	Not significant	Not significant
group_1587	Helicase	7	0	48	45	0.0155119	14.0722	3.81477	0.127273	0	0.127273	0.427078	Not significant	Not significant
group_16299	dextransucrase	7	0	48	45	0.0155119	14.0722	3.81477	0.127273	0	0.127273	0.427078	Not significant	Not significant
group_16300	Glycosyltransferase group 2 family protein	7	0	48	45	0.0155119	14.0722	3.81477	0.127273	0	0.127273	0.427078	Not significant	Not significant
group_16335	hypothetical protein;DNA-binding protein	7	0	48	45	0.0155119	14.0722	3.81477	0.127273	0	0.127273	0.427078	Not significant	Not significant
group_16424	DUF4367 domain-containing protein	7	0	48	45	0.0155119	14.0722	3.81477	0.127273	0	0.127273	0.427078	Not significant	Not significant
group_16425	25-diketo-D-gluconic acid reductase;Glyoxal reductase	7	0	48	45	0.0155119	14.0722	3.81477	0.127273	0	0.127273	0.427078	Not significant	Not significant
group_16547	SH3b domain-containing protein	7	0	48	45	0.0155119	14.0722	3.81477	0.127273	0	0.127273	0.427078	Not significant	Not significant
group_16550	hypothetical protein	7	0	48	45	0.0155119	14.0722	3.81477	0.127273	0	0.127273	0.427078	Not significant	Not significant
group_16559	Superinfection immunity protein	7	0	48	45	0.0155119	14.0722	3.81477	0.127273	0	0.127273	0.427078	Not significant	Not significant
group_16561	DUF4149 domain-containing protein;Lipoprotein;Branched-chain amino acid transport system carrier protein	7	0	48	45	0.0155119	14.0722	3.81477	0.127273	0	0.127273	0.427078	Not significant	Not significant
group_16565	Membrane associated protein	7	0	48	45	0.0155119	14.0722	3.81477	0.127273	0	0.127273	0.427078	Not significant	Not significant
group_16624	hypothetical protein;Membrane protein	7	0	48	45	0.0155119	14.0722	3.81477	0.127273	0	0.127273	0.427078	Not significant	Not significant
group_16674	Glucosyl transferase;Glucosyltransferase-I	7	0	48	45	0.0155119	14.0722	3.81477	0.127273	0	0.127273	0.427078	Not significant	Not significant
group_16723	N-acetylmuramoyl-L-alanine amidase sle1	7	0	48	45	0.0155119	14.0722	3.81477	0.127273	0	0.127273	0.427078	Not significant	Not significant
group_16760	Histidine kinase	7	0	48	45	0.0155119	14.0722	3.81477	0.127273	0	0.127273	0.427078	Not significant	Not significant
group_16796	Glucosyl transferase	7	0	48	45	0.0155119	14.0722	3.81477	0.127273	0	0.127273	0.427078	Not significant	Not significant
group_16810	Dextranase	7	0	48	45	0.0155119	14.0722	3.81477	0.127273	0	0.127273	0.427078	Not significant	Not significant
group_16816	Isochorismatase-like domain-containing protein	7	0	48	45	0.0155119	14.0722	3.81477	0.127273	0	0.127273	0.427078	Not significant	Not significant
group_16897	Levanbiose-producing levanase	7	0	48	45	0.0155119	14.0722	3.81477	0.127273	0	0.127273	0.427078	Not significant	Not significant
group_16994	HTH cro/C1-type domain-containing protein	7	0	48	45	0.0155119	14.0722	3.81477	0.127273	0	0.127273	0.427078	Not significant	Not significant
group_17027	Gram-positive cocci surface proteins LPxTG domain-containing protein	7	0	48	45	0.0155119	14.0722	3.81477	0.127273	0	0.127273	0.427078	Not significant	Not significant
group_17037	hypothetical protein;Lipoprotein	7	0	48	45	0.0155119	14.0722	3.81477	0.127273	0	0.127273	0.427078	Not significant	Not significant
group_17064	Sensor histidine kinase	7	0	48	45	0.0155119	14.0722	3.81477	0.127273	0	0.127273	0.427078	Not significant	Not significant
group_17166	CPBP family intramembrane metalloprotease	7	0	48	45	0.0155119	14.0722	3.81477	0.127273	0	0.127273	0.427078	Not significant	Not significant
group_17184	DUF4767 domain-containing protein	7	0	48	45	0.0155119	14.0722	3.81477	0.127273	0	0.127273	0.427078	Not significant	Not significant
group_17191	pyridoxal 5'-phosphate synthase glutaminase subunit PdxT	7	0	48	45	0.0155119	14.0722	3.81477	0.127273	0	0.127273	0.427078	Not significant	Not significant
group_17196	Carboxylesterase	7	0	48	45	0.0155119	14.0722	3.81477	0.127273	0	0.127273	0.427078	Not significant	Not significant
group_17208	DUF3021 domain-containing protein;PF11457 family protein	7	0	48	45	0.0155119	14.0722	3.81477	0.127273	0	0.127273	0.427078	Not significant	Not significant
group_17220	DUF3021 domain-containing protein	7	0	48	45	0.0155119	14.0722	3.81477	0.127273	0	0.127273	0.427078	Not significant	Not significant
group_17229	amidase	7	0	48	45	0.0155119	14.0722	3.81477	0.127273	0	0.127273	0.427078	Not significant	Not significant
group_17230	Amino acid ABC transporter permease	7	0	48	45	0.0155119	14.0722	3.81477	0.127273	0	0.127273	0.427078	Not significant	Not significant
group_17238	HTH tetR-type domain-containing protein	7	0	48	45	0.0155119	14.0722	3.81477	0.127273	0	0.127273	0.427078	Not significant	Not significant
group_17264	ABC transporter permease	7	0	48	45	0.0155119	14.0722	3.81477	0.127273	0	0.127273	0.427078	Not significant	Not significant
group_17288	3-hydroxyacyl-[acyl-carrier-protein] dehydratase FabZ	7	0	48	45	0.0155119	14.0722	3.81477	0.127273	0	0.127273	0.427078	Not significant	Not significant
group_17317	1-(5-phosphoribosyl)-5-[(5-phosphoribosylamino)methylideneamino]imidazole-4-carboxamide isomerase	7	0	48	45	0.0155119	14.0722	3.81477	0.127273	0	0.127273	0.427078	Not significant	Not significant
group_17386	hypothetical protein;signal peptide protein	7	0	48	45	0.0155119	14.0722	3.81477	0.127273	0	0.127273	0.427078	Not significant	Not significant
group_17387	ABC transporter permease protein	7	0	48	45	0.0155119	14.0722	3.81477	0.127273	0	0.127273	0.427078	Not significant	Not significant
group_17416	Signal transduction histidine kinase	7	0	48	45	0.0155119	14.0722	3.81477	0.127273	0	0.127273	0.427078	Not significant	Not significant
group_17432	Gram-positive cocci surface proteins LPxTG domain-containing protein	7	0	48	45	0.0155119	14.0722	3.81477	0.127273	0	0.127273	0.427078	Not significant	Not significant
group_17459	ATP phosphoribosyltransferase regulatory subunit	7	0	48	45	0.0155119	14.0722	3.81477	0.127273	0	0.127273	0.427078	Not significant	Not significant
group_17489	Levansucrase	7	0	48	45	0.0155119	14.0722	3.81477	0.127273	0	0.127273	0.427078	Not significant	Not significant
group_17541	imidazole glycerol phosphate synthase subunit HisH	7	0	48	45	0.0155119	14.0722	3.81477	0.127273	0	0.127273	0.427078	Not significant	Not significant
group_17618	Cell wall-active antibiotics response LiaF-like C-terminal domain-containing protein	7	0	48	45	0.0155119	14.0722	3.81477	0.127273	0	0.127273	0.427078	Not significant	Not significant
group_17626	CAP domain-containing protein;Methyl-accepting transducer domain-containing protein	7	0	48	45	0.0155119	14.0722	3.81477	0.127273	0	0.127273	0.427078	Not significant	Not significant
group_17722	DUF1093 domain-containing protein	7	0	48	45	0.0155119	14.0722	3.81477	0.127273	0	0.127273	0.427078	Not significant	Not significant
group_17876	DUF1648 domain-containing protein	7	0	48	45	0.0155119	14.0722	3.81477	0.127273	0	0.127273	0.427078	Not significant	Not significant
group_17877	YhfC family intramembrane metalloprotease	7	0	48	45	0.0155119	14.0722	3.81477	0.127273	0	0.127273	0.427078	Not significant	Not significant
group_17883	Peptidase	7	0	48	45	0.0155119	14.0722	3.81477	0.127273	0	0.127273	0.427078	Not significant	Not significant
group_17944	DUF3796 domain-containing protein	7	0	48	45	0.0155119	14.0722	3.81477	0.127273	0	0.127273	0.427078	Not significant	Not significant
group_18001	Flavodoxin-like fold protein	7	0	48	45	0.0155119	14.0722	3.81477	0.127273	0	0.127273	0.427078	Not significant	Not significant
group_18017	Putative major cell-binding factor;ABC-type amino acid transport/signal transduction system periplasmic component/domain	7	0	48	45	0.0155119	14.0722	3.81477	0.127273	0	0.127273	0.427078	Not significant	Not significant
group_18074	Macrolide export ATP-binding/permease protein MacB	7	0	48	45	0.0155119	14.0722	3.81477	0.127273	0	0.127273	0.427078	Not significant	Not significant
group_18164	CAAX protease;CAAX amino terminal protease family	7	0	48	45	0.0155119	14.0722	3.81477	0.127273	0	0.127273	0.427078	Not significant	Not significant
group_18192	Carbonic anhydrase	7	0	48	45	0.0155119	14.0722	3.81477	0.127273	0	0.127273	0.427078	Not significant	Not significant
group_18203	dextransucrase	7	0	48	45	0.0155119	14.0722	3.81477	0.127273	0	0.127273	0.427078	Not significant	Not significant
group_18204	Lipoprotein;Carbohydrate-binding domain-containing protein	7	0	48	45	0.0155119	14.0722	3.81477	0.127273	0	0.127273	0.427078	Not significant	Not significant
group_18348	Peptidylprolyl isomerase;Cytosolic protein;hypothetical protein	7	0	48	45	0.0155119	14.0722	3.81477	0.127273	0	0.127273	0.427078	Not significant	Not significant
group_18413	YSIRK-type signal peptide-containing protein;Pullulanase;Signal peptide protein YSIRK family	7	0	48	45	0.0155119	14.0722	3.81477	0.127273	0	0.127273	0.427078	Not significant	Not significant
group_18449	Glycerol dehydrogenase	7	0	48	45	0.0155119	14.0722	3.81477	0.127273	0	0.127273	0.427078	Not significant	Not significant
group_18450	Cytosolic protein	7	0	48	45	0.0155119	14.0722	3.81477	0.127273	0	0.127273	0.427078	Not significant	Not significant
group_18533	Putative histidine kinase (Sensory transduction protein kinase)	7	0	48	45	0.0155119	14.0722	3.81477	0.127273	0	0.127273	0.427078	Not significant	Not significant
group_18543	Sensor histidine kinase	7	0	48	45	0.0155119	14.0722	3.81477	0.127273	0	0.127273	0.427078	Not significant	Not significant
group_18571	Transcriptional regulator	7	0	48	45	0.0155119	14.0722	3.81477	0.127273	0	0.127273	0.427078	Not significant	Not significant
group_18591	Cell wall hydrolase	7	0	48	45	0.0155119	14.0722	3.81477	0.127273	0	0.127273	0.427078	Not significant	Not significant
group_18604	pullulanase	7	0	48	45	0.0155119	14.0722	3.81477	0.127273	0	0.127273	0.427078	Not significant	Not significant
group_18611	CAAX amino terminal protease family;CPBP family intramembrane metalloprotease	7	0	48	45	0.0155119	14.0722	3.81477	0.127273	0	0.127273	0.427078	Not significant	Not significant
group_18684	DUF3278 domain-containing protein	7	0	48	45	0.0155119	14.0722	3.81477	0.127273	0	0.127273	0.427078	Not significant	Not significant
group_18727	PF11457 family protein;DUF6773 domain-containing protein	7	0	48	45	0.0155119	14.0722	3.81477	0.127273	0	0.127273	0.427078	Not significant	Not significant
group_18743	Sensory transduction protein kinase	7	0	48	45	0.0155119	14.0722	3.81477	0.127273	0	0.127273	0.427078	Not significant	Not significant
group_18783	histidinol-phosphate transaminase	7	0	48	45	0.0155119	14.0722	3.81477	0.127273	0	0.127273	0.427078	Not significant	Not significant
group_18808	Manganese ABC transporter substrate-binding lipoprotein	7	0	48	45	0.0155119	14.0722	3.81477	0.127273	0	0.127273	0.427078	Not significant	Not significant
group_18811	Gram-positive cocci surface proteins LPxTG domain-containing protein	7	0	48	45	0.0155119	14.0722	3.81477	0.127273	0	0.127273	0.427078	Not significant	Not significant
group_18845	Transcriptional regulator TetR family	7	0	48	45	0.0155119	14.0722	3.81477	0.127273	0	0.127273	0.427078	Not significant	Not significant
group_18857	DegV family protein	7	0	48	45	0.0155119	14.0722	3.81477	0.127273	0	0.127273	0.427078	Not significant	Not significant
group_18873	DUF6287 domain-containing protein	7	0	48	45	0.0155119	14.0722	3.81477	0.127273	0	0.127273	0.427078	Not significant	Not significant
group_19010	Gram-positive cocci surface proteins LPxTG domain-containing protein;Gram positive anchor domain protein;Carbohydrate-binding domain-containing protein	7	0	48	45	0.0155119	14.0722	3.81477	0.127273	0	0.127273	0.427078	Not significant	Not significant
group_19023	Sodium transporter	7	0	48	45	0.0155119	14.0722	3.81477	0.127273	0	0.127273	0.427078	Not significant	Not significant
group_19057	MucBP domain protein	7	0	48	45	0.0155119	14.0722	3.81477	0.127273	0	0.127273	0.427078	Not significant	Not significant
group_19092	Cell wall-active antibiotics response LiaF-like C-terminal domain-containing protein	7	0	48	45	0.0155119	14.0722	3.81477	0.127273	0	0.127273	0.427078	Not significant	Not significant
group_19105	Metal ion ABC transporter permease protein	7	0	48	45	0.0155119	14.0722	3.81477	0.127273	0	0.127273	0.427078	Not significant	Not significant
group_19209	Lipoprotein	7	0	48	45	0.0155119	14.0722	3.81477	0.127273	0	0.127273	0.427078	Not significant	Not significant
group_19230	dextransucrase	7	0	48	45	0.0155119	14.0722	3.81477	0.127273	0	0.127273	0.427078	Not significant	Not significant
group_19234	Histidine kinase	7	0	48	45	0.0155119	14.0722	3.81477	0.127273	0	0.127273	0.427078	Not significant	Not significant
group_19250	Type II toxin-antitoxin system HicB family antitoxin	7	0	48	45	0.0155119	14.0722	3.81477	0.127273	0	0.127273	0.427078	Not significant	Not significant
group_19279	Phage protein	7	0	48	45	0.0155119	14.0722	3.81477	0.127273	0	0.127273	0.427078	Not significant	Not significant
group_19329	Lipoprotein-releasing system ATP-binding protein lolD	7	0	48	45	0.0155119	14.0722	3.81477	0.127273	0	0.127273	0.427078	Not significant	Not significant
group_19352	ABC transporter permease protein	7	0	48	45	0.0155119	14.0722	3.81477	0.127273	0	0.127273	0.427078	Not significant	Not significant
group_19396	VTC domain-containing protein	7	0	48	45	0.0155119	14.0722	3.81477	0.127273	0	0.127273	0.427078	Not significant	Not significant
group_19401	Sensory transduction protein kinase	7	0	48	45	0.0155119	14.0722	3.81477	0.127273	0	0.127273	0.427078	Not significant	Not significant
group_19440	Pyrimidine regulatory protein PyrR	7	0	48	45	0.0155119	14.0722	3.81477	0.127273	0	0.127273	0.427078	Not significant	Not significant
group_19598	Lipoprotein	7	0	48	45	0.0155119	14.0722	3.81477	0.127273	0	0.127273	0.427078	Not significant	Not significant
group_19610	Bacteriocin self-immunity protein	7	0	48	45	0.0155119	14.0722	3.81477	0.127273	0	0.127273	0.427078	Not significant	Not significant
group_19637	PTS EIIB type-1 domain-containing protein;PTS beta-glucoside transporter subunit IIABC;PTS transporter subunit EIIC;hypothetical protein;PTS system beta-glucoside-specific IIA IIB and IIC component	7	0	48	45	0.0155119	14.0722	3.81477	0.127273	0	0.127273	0.427078	Not significant	Not significant
group_19730	CAAX amino protease family protein;CPBP family intramembrane metalloprotease	7	0	48	45	0.0155119	14.0722	3.81477	0.127273	0	0.127273	0.427078	Not significant	Not significant
group_19802	Endopeptidase M10 family	7	0	48	45	0.0155119	14.0722	3.81477	0.127273	0	0.127273	0.427078	Not significant	Not significant
group_19806	Fructan beta-fructosidase (Exo-beta-D-fructosidase) (Fructanase)	7	0	48	45	0.0155119	14.0722	3.81477	0.127273	0	0.127273	0.427078	Not significant	Not significant
group_19822	Major facilitator superfamily (MFS) profile domain-containing protein	7	0	48	45	0.0155119	14.0722	3.81477	0.127273	0	0.127273	0.427078	Not significant	Not significant
group_19946	dextransucrase	7	0	48	45	0.0155119	14.0722	3.81477	0.127273	0	0.127273	0.427078	Not significant	Not significant
group_19969	Nod factor export ATP-binding protein I (Nodulation ATP-binding protein I)	7	0	48	45	0.0155119	14.0722	3.81477	0.127273	0	0.127273	0.427078	Not significant	Not significant
group_20037	DUF4956 domain-containing protein	7	0	48	45	0.0155119	14.0722	3.81477	0.127273	0	0.127273	0.427078	Not significant	Not significant
group_20052	DNA-binding response regulator	7	0	48	45	0.0155119	14.0722	3.81477	0.127273	0	0.127273	0.427078	Not significant	Not significant
group_20079	CAAX amino terminal protease family	7	0	48	45	0.0155119	14.0722	3.81477	0.127273	0	0.127273	0.427078	Not significant	Not significant
group_20156	Lipoprotein	7	0	48	45	0.0155119	14.0722	3.81477	0.127273	0	0.127273	0.427078	Not significant	Not significant
group_20166	Thiol reductase thioredoxin;Thioredoxin domain-containing protein	7	0	48	45	0.0155119	14.0722	3.81477	0.127273	0	0.127273	0.427078	Not significant	Not significant
group_2017	Gram-positive cocci surface proteins LPxTG domain-containing protein	7	0	48	45	0.0155119	14.0722	3.81477	0.127273	0	0.127273	0.427078	Not significant	Not significant
group_20342	Hemin transport system permease protein HmuU	7	0	48	45	0.0155119	14.0722	3.81477	0.127273	0	0.127273	0.427078	Not significant	Not significant
group_20373	Inner membrane protein YhaI;DUF805 domain-containing protein	7	0	48	45	0.0155119	14.0722	3.81477	0.127273	0	0.127273	0.427078	Not significant	Not significant
group_20408	PF03932 family protein CutC	7	0	48	45	0.0155119	14.0722	3.81477	0.127273	0	0.127273	0.427078	Not significant	Not significant
group_20498	Conjugal transfer protein;hypothetical protein	7	0	48	45	0.0155119	14.0722	3.81477	0.127273	0	0.127273	0.427078	Not significant	Not significant
group_20554	Glucosyltransferase-I	7	0	48	45	0.0155119	14.0722	3.81477	0.127273	0	0.127273	0.427078	Not significant	Not significant
group_20575	Bacteriocin immunity protein	7	0	48	45	0.0155119	14.0722	3.81477	0.127273	0	0.127273	0.427078	Not significant	Not significant
group_20589	DUF3021 domain-containing protein	7	0	48	45	0.0155119	14.0722	3.81477	0.127273	0	0.127273	0.427078	Not significant	Not significant
group_20855	DUF6287 domain-containing protein;hypothetical protein;Putative lipoprotein	7	0	48	45	0.0155119	14.0722	3.81477	0.127273	0	0.127273	0.427078	Not significant	Not significant
group_20902	SP_0198 family lipoprotein	7	0	48	45	0.0155119	14.0722	3.81477	0.127273	0	0.127273	0.427078	Not significant	Not significant
group_20903	PepSY domain-containing protein;Arginyl-tRNA synthetase	7	0	48	45	0.0155119	14.0722	3.81477	0.127273	0	0.127273	0.427078	Not significant	Not significant
group_20997	Histidine kinase	7	0	48	45	0.0155119	14.0722	3.81477	0.127273	0	0.127273	0.427078	Not significant	Not significant
group_21011	ABC transporter substrate-binding protein	7	0	48	45	0.0155119	14.0722	3.81477	0.127273	0	0.127273	0.427078	Not significant	Not significant
group_21087	dextransucrase;glycoside hydrolase family 70 protein	7	0	48	45	0.0155119	14.0722	3.81477	0.127273	0	0.127273	0.427078	Not significant	Not significant
group_21096	DUF1722 domain-containing protein	7	0	48	45	0.0155119	14.0722	3.81477	0.127273	0	0.127273	0.427078	Not significant	Not significant
group_21097	DUF1828 domain-containing protein;Cytosolic protein	7	0	48	45	0.0155119	14.0722	3.81477	0.127273	0	0.127273	0.427078	Not significant	Not significant
group_21160	Response regulator of the LytR/AlgR family protein	7	0	48	45	0.0155119	14.0722	3.81477	0.127273	0	0.127273	0.427078	Not significant	Not significant
group_21169	Alpha/beta hydrolase;Esterase;Esterase alpha/beta hydrolase family	7	0	48	45	0.0155119	14.0722	3.81477	0.127273	0	0.127273	0.427078	Not significant	Not significant
group_21225	Pyrimidine dimer DNA glycosylase	7	0	48	45	0.0155119	14.0722	3.81477	0.127273	0	0.127273	0.427078	Not significant	Not significant
group_2140	Exonuclease;ATP-dependent dsDNA exonuclease	7	0	48	45	0.0155119	14.0722	3.81477	0.127273	0	0.127273	0.427078	Not significant	Not significant
group_21520	Choline binding protein A;Glucosyl transferase	7	0	48	45	0.0155119	14.0722	3.81477	0.127273	0	0.127273	0.427078	Not significant	Not significant
group_21567	Transcriptional regulator HosA	7	0	48	45	0.0155119	14.0722	3.81477	0.127273	0	0.127273	0.427078	Not significant	Not significant
group_258	dextransucrase	7	0	48	45	0.0155119	14.0722	3.81477	0.127273	0	0.127273	0.427078	Not significant	Not significant
group_4145	Putative histidine kinase (Sensory transduction protein kinase)	7	0	48	45	0.0155119	14.0722	3.81477	0.127273	0	0.127273	0.427078	Not significant	Not significant
group_553	HTH cro/C1-type domain-containing protein	7	0	48	45	0.0155119	14.0722	3.81477	0.127273	0	0.127273	0.427078	Not significant	Not significant
group_554	Glucosyltransferase-I	7	0	48	45	0.0155119	14.0722	3.81477	0.127273	0	0.127273	0.427078	Not significant	Not significant
group_575	hypothetical protein;Lipoprotein	7	0	48	45	0.0155119	14.0722	3.81477	0.127273	0	0.127273	0.427078	Not significant	Not significant
group_6760	ABC-2 type transporter transmembrane domain-containing protein	7	0	48	45	0.0155119	14.0722	3.81477	0.127273	0	0.127273	0.427078	Not significant	Not significant
group_6999	ABC transporter ATP-binding protein	7	0	48	45	0.0155119	14.0722	3.81477	0.127273	0	0.127273	0.427078	Not significant	Not significant
group_7750	ATP-binding cassette domain-containing protein	7	0	48	45	0.0155119	14.0722	3.81477	0.127273	0	0.127273	0.427078	Not significant	Not significant
hisB	imidazoleglycerol-phosphate dehydratase HisB	7	0	48	45	0.0155119	14.0722	3.81477	0.127273	0	0.127273	0.427078	Not significant	Not significant
hisD	Histidinol dehydrogenase	7	0	48	45	0.0155119	14.0722	3.81477	0.127273	0	0.127273	0.427078	Not significant	Not significant
hisG	ATP phosphoribosyltransferase	7	0	48	45	0.0155119	14.0722	3.81477	0.127273	0	0.127273	0.427078	Not significant	Not significant
hmuV	Hemin import ATP-binding protein hmuV	7	0	48	45	0.0155119	14.0722	3.81477	0.127273	0	0.127273	0.427078	Not significant	Not significant
ideR~~~mntR	Iron-dependent repressor ideR;Mn-dependent transcriptional regulator MntR	7	0	48	45	0.0155119	14.0722	3.81477	0.127273	0	0.127273	0.427078	Not significant	Not significant
pdxS	pyridoxal 5'-phosphate synthase lyase subunit PdxS	7	0	48	45	0.0155119	14.0722	3.81477	0.127273	0	0.127273	0.427078	Not significant	Not significant
sbcD	DNA repair exonuclease SbcCD nuclease subunit	7	0	48	45	0.0155119	14.0722	3.81477	0.127273	0	0.127273	0.427078	Not significant	Not significant
sulP	Putative sulfate transporter ychM	7	0	48	45	0.0155119	14.0722	3.81477	0.127273	0	0.127273	0.427078	Not significant	Not significant
tipA	HTH-type transcriptional activator tipA	7	0	48	45	0.0155119	14.0722	3.81477	0.127273	0	0.127273	0.427078	Not significant	Not significant
tkt	transketolase	7	0	48	45	0.0155119	14.0722	3.81477	0.127273	0	0.127273	0.427078	Not significant	Not significant
yckB	Putative ABC transporter extracellular-binding protein yckB (ORF2)	7	0	48	45	0.0155119	14.0722	3.81477	0.127273	0	0.127273	0.427078	Not significant	Not significant
yfeB	Chelated iron transport system membrane protein YfeB	7	0	48	45	0.0155119	14.0722	3.81477	0.127273	0	0.127273	0.427078	Not significant	Not significant
group_613	hypothetical protein;Phage protein	14	3	41	42	0.0157576	4.24269	2.08498	0.254545	0.0666667	0.187879	0.427078	Not significant	Not significant
ssuE	Flavin reductase;NAD(P)H-dependent FMN reductase;NAD(P)H-dependent oxidoreductase;hypothetical protein	41	42	14	3	0.0157576	0.2357	-2.08498	0.745455	0.933333	-0.187879	0.427078	Not significant	Not significant
dpnI	Type II restriction endonuclease DpnI	37	40	18	5	0.0159251	0.275275	-1.86105	0.672727	0.888889	-0.216162	0.427078	Not significant	Enriched in Sensitive
nupP~~~mglC	ABC transporter permease;ABC-type guanosine uptake system NupNOPQ permease component NupP;Galactoside transport system permease protein MglC;Branched-chain amino acid ABC transporter permease protein;Sugar ABC transporter permease;Putative deoxyribose-specific ABC transporter permease protein;hypothetical protein	37	40	18	5	0.0159251	0.275275	-1.86105	0.672727	0.888889	-0.216162	0.427078	Not significant	Enriched in Sensitive
group_19080	Putative membrane protein (TMS4);Membrane protein (TMS4)	18	5	37	40	0.0159251	3.63273	1.86105	0.327273	0.111111	0.216162	0.427078	Not significant	Enriched in Resistant
group_1907	HTH LytTR-type domain-containing protein;LytTR family transcriptional regulator;Autolysis response regulater LytR	23	8	32	37	0.0160887	3.19005	1.67358	0.418182	0.177778	0.240404	0.427078	Not significant	Enriched in Resistant
group_10503	DUF5085 domain-containing protein	0	5	55	40	0.0162279	0.0663391	-3.914	0	0.111111	-0.111111	0.427078	Not significant	Not significant
group_10916	DUF1310 domain-containing protein	0	5	55	40	0.0162279	0.0663391	-3.914	0	0.111111	-0.111111	0.427078	Not significant	Not significant
group_10945	DUF1310 domain-containing protein	0	5	55	40	0.0162279	0.0663391	-3.914	0	0.111111	-0.111111	0.427078	Not significant	Not significant
group_13324	DUF2187 domain-containing protein	0	5	55	40	0.0162279	0.0663391	-3.914	0	0.111111	-0.111111	0.427078	Not significant	Not significant
group_13635	Cation:proton antiporter	0	5	55	40	0.0162279	0.0663391	-3.914	0	0.111111	-0.111111	0.427078	Not significant	Not significant
group_1437	LXG domain-containing protein;Virulence protein	0	5	55	40	0.0162279	0.0663391	-3.914	0	0.111111	-0.111111	0.427078	Not significant	Not significant
group_1448	DUF4176 domain-containing protein	0	5	55	40	0.0162279	0.0663391	-3.914	0	0.111111	-0.111111	0.427078	Not significant	Not significant
group_16155	hypothetical protein;DUF443 domain-containing protein	0	5	55	40	0.0162279	0.0663391	-3.914	0	0.111111	-0.111111	0.427078	Not significant	Not significant
group_17693	Integral membrane protein	0	5	55	40	0.0162279	0.0663391	-3.914	0	0.111111	-0.111111	0.427078	Not significant	Not significant
group_17694	DUF5085 domain-containing protein	0	5	55	40	0.0162279	0.0663391	-3.914	0	0.111111	-0.111111	0.427078	Not significant	Not significant
group_18026	Transposase IS3/IS911 family protein;Transposase	0	5	55	40	0.0162279	0.0663391	-3.914	0	0.111111	-0.111111	0.427078	Not significant	Not significant
group_18466	Asp-tRNA(Asn)/Glu-tRNA(Gln) amidotransferase GatCAB subunit B;Aspartyl/glutamyl-tRNA(Asn/Gln) amidotransferase subunit B;Aspartyl-tRNA(Asn) amidotransferase subunit B / Glutamyl-tRNA(Gln) amidotransferase subunit B	0	5	55	40	0.0162279	0.0663391	-3.914	0	0.111111	-0.111111	0.427078	Not significant	Not significant
group_1923	YSIRK signal domain/LPXTG anchor domain surface protein;hypothetical protein;YSIRK type signal peptide	0	5	55	40	0.0162279	0.0663391	-3.914	0	0.111111	-0.111111	0.427078	Not significant	Not significant
group_19766	Transcriptional regulator TetR/AcrR family putative	0	5	55	40	0.0162279	0.0663391	-3.914	0	0.111111	-0.111111	0.427078	Not significant	Not significant
group_20371	Bacitracin transport ATP binding cassette transporter ABC protein	0	5	55	40	0.0162279	0.0663391	-3.914	0	0.111111	-0.111111	0.427078	Not significant	Not significant
group_20590	Lipoprotein;Lipoprotein putative	0	5	55	40	0.0162279	0.0663391	-3.914	0	0.111111	-0.111111	0.427078	Not significant	Not significant
group_20775	Bacitracin ABC transporter permease	0	5	55	40	0.0162279	0.0663391	-3.914	0	0.111111	-0.111111	0.427078	Not significant	Not significant
group_21058	HTH tetR-type domain-containing protein	0	5	55	40	0.0162279	0.0663391	-3.914	0	0.111111	-0.111111	0.427078	Not significant	Not significant
group_21203	Glyoxalase family protein;hypothetical protein	0	5	55	40	0.0162279	0.0663391	-3.914	0	0.111111	-0.111111	0.427078	Not significant	Not significant
group_21703	Ovule protein	0	5	55	40	0.0162279	0.0663391	-3.914	0	0.111111	-0.111111	0.427078	Not significant	Not significant
group_642	ABC transporter ATP-binding protein;ATP-binding cassette domain-containing protein	0	5	55	40	0.0162279	0.0663391	-3.914	0	0.111111	-0.111111	0.427078	Not significant	Not significant
group_9621	Lipoprotein	0	5	55	40	0.0162279	0.0663391	-3.914	0	0.111111	-0.111111	0.427078	Not significant	Not significant
ycgJ	Putative methyltransferase YcgJ	0	5	55	40	0.0162279	0.0663391	-3.914	0	0.111111	-0.111111	0.427078	Not significant	Not significant
group_1129	PTS mannose transporter subunit IID;hypothetical protein	5	13	50	32	0.0170385	0.262193	-1.9313	0.0909091	0.288889	-0.19798	0.440452	Not significant	Not significant
group_20655	Competence-specific global transcription modulator;Transcriptional regulator ComX1;Transcriptional regulator	3	10	52	35	0.0171038	0.225397	-2.14946	0.0545455	0.222222	-0.167677	0.440452	Not significant	Not significant
ucpA	SDR family oxidoreductase UcpA	3	10	52	35	0.0171038	0.225397	-2.14946	0.0545455	0.222222	-0.167677	0.440452	Not significant	Not significant
ssnA	TRZ/ATZ family protein;Chlorohydrolase;5-methylthioadenosine/S-adenosylhomocysteine deaminase;Atz/Trz family protein N-terminal truncation;amidohydrolase family protein	31	36	24	9	0.0182069	0.334638	-1.57933	0.563636	0.8	-0.236364	0.440452	Not significant	Enriched in Sensitive
aceF	dihydrolipoamide acetyltransferase;Peripheral subunit-binding (PSBD) domain-containing protein	43	43	12	2	0.0184939	0.2	-2.32193	0.781818	0.955556	-0.173737	0.440452	Not significant	Not significant
acoA~~~pdhA	TPP-dependent pyruvate or acetoin dehydrogenase subunit alpha;Acetoin dehydrogenase E1 component alpha-subunit	43	43	12	2	0.0184939	0.2	-2.32193	0.781818	0.955556	-0.173737	0.440452	Not significant	Not significant
acoB	Pyruvate/2-oxoglutarate/acetoin dehydrogenase complex dehydrogenase (E1) component beta subunit;hypothetical protein;Acetoin dehydrogenase;Transketolase C-terminal domain-containing protein;Acetoin dehydrogenase E1 component beta-subuni	43	43	12	2	0.0184939	0.2	-2.32193	0.781818	0.955556	-0.173737	0.440452	Not significant	Not significant
lpdA	dihydrolipoyl dehydrogenase;Dihydrolipoyl dehydrogenase;biotin/lipoyl-containing protein;hypothetical protein	43	43	12	2	0.0184939	0.2	-2.32193	0.781818	0.955556	-0.173737	0.440452	Not significant	Not significant
lplA	lipoate--protein ligase;Lipoate-protein ligase A	43	43	12	2	0.0184939	0.2	-2.32193	0.781818	0.955556	-0.173737	0.440452	Not significant	Not significant
manO	PTS mannose transporter accessory protein ManO;DUF956 domain-containing protein;Mannose operon ManO protein;Regulator of the mannose operon ManO;PF06115 domain protein	43	43	12	2	0.0184939	0.2	-2.32193	0.781818	0.955556	-0.173737	0.440452	Not significant	Not significant
group_1511	Phosphoglycerate mutase;Histidine phosphatase family protein;histidine phosphatase family protein	8	16	47	29	0.0188268	0.319936	-1.64414	0.145455	0.355556	-0.210101	0.440452	Not significant	Enriched in Sensitive
group_15532	TraG P-loop domain-containing protein	8	16	47	29	0.0188268	0.319936	-1.64414	0.145455	0.355556	-0.210101	0.440452	Not significant	Enriched in Sensitive
group_15535	Conjugal transfer protein TrbL	8	16	47	29	0.0188268	0.319936	-1.64414	0.145455	0.355556	-0.210101	0.440452	Not significant	Enriched in Sensitive
group_15537	Integrative and conjugative element protein	8	16	47	29	0.0188268	0.319936	-1.64414	0.145455	0.355556	-0.210101	0.440452	Not significant	Enriched in Sensitive
group_1683	Integrative and conjugative element protein	8	16	47	29	0.0188268	0.319936	-1.64414	0.145455	0.355556	-0.210101	0.440452	Not significant	Enriched in Sensitive
group_18024	PrgI family protein	8	16	47	29	0.0188268	0.319936	-1.64414	0.145455	0.355556	-0.210101	0.440452	Not significant	Enriched in Sensitive
group_18109	Integrative and conjugative element protein	8	16	47	29	0.0188268	0.319936	-1.64414	0.145455	0.355556	-0.210101	0.440452	Not significant	Enriched in Sensitive
group_19305	Type IV secretory system Conjugative DNA transfer family protein;TraM recognition domain-containing protein;TraG/TraD family protein	8	16	47	29	0.0188268	0.319936	-1.64414	0.145455	0.355556	-0.210101	0.440452	Not significant	Enriched in Sensitive
group_20550	DEAD/DEAH box helicase family protein;Helicase C-terminal domain-containing protein;Helicase ATP-binding domain-containing protein	8	16	47	29	0.0188268	0.319936	-1.64414	0.145455	0.355556	-0.210101	0.440452	Not significant	Enriched in Sensitive
group_20884	Cell envelope biogenesis protein OmpA	8	16	47	29	0.0188268	0.319936	-1.64414	0.145455	0.355556	-0.210101	0.440452	Not significant	Enriched in Sensitive
group_2447	DUF2179 domain-containing protein	8	16	47	29	0.0188268	0.319936	-1.64414	0.145455	0.355556	-0.210101	0.440452	Not significant	Enriched in Sensitive
galK	galactokinase;Galactokinase;hypothetical protein	19	6	36	39	0.0198852	3.24658	1.69892	0.345455	0.133333	0.212121	0.440452	Not significant	Enriched in Resistant
group_16684	Response regulatory domain-containing protein	19	6	36	39	0.0198852	3.24658	1.69892	0.345455	0.133333	0.212121	0.440452	Not significant	Enriched in Resistant
group_18492	ABC3 transporter permease protein domain-containing protein;Transmembrane protein Vexp3	19	6	36	39	0.0198852	3.24658	1.69892	0.345455	0.133333	0.212121	0.440452	Not significant	Enriched in Resistant
group_19583	ABC transporter ATP-binding protein	19	6	36	39	0.0198852	3.24658	1.69892	0.345455	0.133333	0.212121	0.440452	Not significant	Enriched in Resistant
group_19584	histidine kinase;histidine kinase dimerization/phospho-acceptor domain-containing protein;hypothetical protein	19	6	36	39	0.0198852	3.24658	1.69892	0.345455	0.133333	0.212121	0.440452	Not significant	Enriched in Resistant
group_2440	histidine kinase	19	6	36	39	0.0198852	3.24658	1.69892	0.345455	0.133333	0.212121	0.440452	Not significant	Enriched in Resistant
group_2805	Uncharacterized membrane protein;Small multi-drug export protein;Putative small multi-drug export protein;Small multidrug export protein (QacE-like)	19	6	36	39	0.0198852	3.24658	1.69892	0.345455	0.133333	0.212121	0.440452	Not significant	Enriched in Resistant
group_921	SnoaL-like domain-containing protein;putative SnoaL-like aldol condensation-catalyzing enzyme;SnoaL-like polyketide cyclase domain protein;Polyketide cyclase;Lipoprotein	13	21	42	24	0.0200105	0.36197	-1.46606	0.236364	0.466667	-0.230303	0.440452	Not significant	Enriched in Sensitive
group_19879	hypothetical protein;Integral membrane protein	10	1	45	44	0.02074	6.84615	2.77529	0.181818	0.0222222	0.159596	0.440452	Not significant	Not significant
group_2420	Transcriptional regulator;Putative transcriptional regulator Arp2;Putative transcriptional regulator;XRE family transcriptional regulator;Helix-turn-helix domain-containing protein;DNA-binding helix-turn-helix protein	10	1	45	44	0.02074	6.84615	2.77529	0.181818	0.0222222	0.159596	0.440452	Not significant	Not significant
group_2815	DUF308 domain-containing protein	10	1	45	44	0.02074	6.84615	2.77529	0.181818	0.0222222	0.159596	0.440452	Not significant	Not significant
acpA~~~acpB	M protein trans-acting positive regulator;Capsule synthesis positive regulator AcpA;Capsule synthesis positive regulator AcpB	1	7	54	38	0.0211137	0.141284	-2.82333	0.0181818	0.155556	-0.137374	0.440452	Not significant	Not significant
arsC	Arsenate reductase or related protein glutaredoxin family;Arsenate reductase	1	7	54	38	0.0211137	0.141284	-2.82333	0.0181818	0.155556	-0.137374	0.440452	Not significant	Not significant
group_14858	hypothetical protein	1	7	54	38	0.0211137	0.141284	-2.82333	0.0181818	0.155556	-0.137374	0.440452	Not significant	Not significant
group_14984	Transposase	1	7	54	38	0.0211137	0.141284	-2.82333	0.0181818	0.155556	-0.137374	0.440452	Not significant	Not significant
group_17248	HAD hydrolase IA variant 1 family protein	1	7	54	38	0.0211137	0.141284	-2.82333	0.0181818	0.155556	-0.137374	0.440452	Not significant	Not significant
group_19464	Bacteriocin-associated integral membrane protein	1	7	54	38	0.0211137	0.141284	-2.82333	0.0181818	0.155556	-0.137374	0.440452	Not significant	Not significant
group_19829	4-hydroxythreonine-4-phosphate dehydrogenase	1	7	54	38	0.0211137	0.141284	-2.82333	0.0181818	0.155556	-0.137374	0.440452	Not significant	Not significant
group_19870	Autolysin;Choline-binding protein A;hypothetical protein;SEC10/PgrA surface exclusion domain-containing protein	1	7	54	38	0.0211137	0.141284	-2.82333	0.0181818	0.155556	-0.137374	0.440452	Not significant	Not significant
group_20197	ABC transporter ATP-binding protein	1	7	54	38	0.0211137	0.141284	-2.82333	0.0181818	0.155556	-0.137374	0.440452	Not significant	Not significant
group_21156	accessory Sec system protein Asp3	1	7	54	38	0.0211137	0.141284	-2.82333	0.0181818	0.155556	-0.137374	0.440452	Not significant	Not significant
group_2847	hypothetical protein;DUF4062 domain-containing protein	1	7	54	38	0.0211137	0.141284	-2.82333	0.0181818	0.155556	-0.137374	0.440452	Not significant	Not significant
vanW	VanW like family protein	1	7	54	38	0.0211137	0.141284	-2.82333	0.0181818	0.155556	-0.137374	0.440452	Not significant	Not significant
group_410	hypothetical protein;Cytochrome D ubiquinol oxidase subunit I;Conserved domain protein	9	1	46	44	0.0212189	6.06093	2.59954	0.163636	0.0222222	0.141414	0.440452	Not significant	Not significant
coaB	phosphopantothenate--cysteine ligase	9	17	46	28	0.0215405	0.332719	-1.58762	0.163636	0.377778	-0.214141	0.440452	Not significant	Enriched in Sensitive
group_1027	Ribonuclease P;Sakacin A production response regulator	9	17	46	28	0.0215405	0.332719	-1.58762	0.163636	0.377778	-0.214141	0.440452	Not significant	Enriched in Sensitive
group_1460	DNA alkylation repair enzyme;Putative DNA alkylation repair enzyme;hypothetical protein;DNA-7-methylguanine glycosylase	9	17	46	28	0.0215405	0.332719	-1.58762	0.163636	0.377778	-0.214141	0.440452	Not significant	Enriched in Sensitive
group_20004	ATPases with chaperone activity ATP-binding subunit	9	17	46	28	0.0215405	0.332719	-1.58762	0.163636	0.377778	-0.214141	0.440452	Not significant	Enriched in Sensitive
group_20524	Chemotaxis protein	9	17	46	28	0.0215405	0.332719	-1.58762	0.163636	0.377778	-0.214141	0.440452	Not significant	Enriched in Sensitive
group_21624	Putative phosphoesterase;Calcineurin-like phosphoesterase;Ser/Thr protein phosphatase family;Phosphoesterase;Calcineurin-like phosphoesterase domain-containing protein;Serine/threonine protein phosphatase	9	17	46	28	0.0215405	0.332719	-1.58762	0.163636	0.377778	-0.214141	0.440452	Not significant	Enriched in Sensitive
group_224	ABC superfamily ATP binding cassette transporter ABC protein;ABC transporter domain-containing protein;Putative ABC transporter ATPase	9	17	46	28	0.0215405	0.332719	-1.58762	0.163636	0.377778	-0.214141	0.440452	Not significant	Enriched in Sensitive
group_2775	DNA-binding response regulator;Putative two-component response transcriptional regulator	9	17	46	28	0.0215405	0.332719	-1.58762	0.163636	0.377778	-0.214141	0.440452	Not significant	Enriched in Sensitive
group_2827	Putative phosphoserine phosphatase 2;Phosphoglycerate mutase;Phosphoglycerate mutase family protein;Phosphoglycerate mutase family 5	9	17	46	28	0.0215405	0.332719	-1.58762	0.163636	0.377778	-0.214141	0.440452	Not significant	Enriched in Sensitive
recX	recombination regulator RecX	9	17	46	28	0.0215405	0.332719	-1.58762	0.163636	0.377778	-0.214141	0.440452	Not significant	Enriched in Sensitive
cpsE~~~wcaJ~~~epsL	Galactosyl transferase cpsE;Galactosyl transferase CpsE;Sugar transferase involved in LPS biosynthesis (colanic teichoic acid);Bacterial sugar transferase domain-containing protein;Glycosyl transferase family protein;Sugar transferase;Undecaprenyl-phosphate galactosephosphotransferase;Putative sugar transferase EpsL;Exopolysaccharide biosynthesis polyprenyl glycosylphosphotransferase;Bacterial su…	49	31	6	14	0.0221017	3.50549	1.80962	0.890909	0.688889	0.20202	0.440452	Not significant	Enriched in Resistant
group_3113	Alcohol dehydrogenase;GroES-like protein;Zn-dependent alcohol dehydrogenase;NADP-dependent isopropanol dehydrogenase;Alcohol dehydrogenase zinc-binding protein;Threonine dehydrogenase;Zinc-containing alcohol dehydrogenase;Threonine dehydrogenase or related Zn-dependent dehydrogenase;alcohol dehydrogenase catalytic domain-containing protein	49	31	6	14	0.0221017	3.50549	1.80962	0.890909	0.688889	0.20202	0.440452	Not significant	Enriched in Resistant
group_1199	aconitate hydratase AcnA	6	14	49	31	0.0221017	0.285266	-1.80962	0.109091	0.311111	-0.20202	0.440452	Not significant	Enriched in Sensitive
group_1200	citrate synthase	6	14	49	31	0.0221017	0.285266	-1.80962	0.109091	0.311111	-0.20202	0.440452	Not significant	Enriched in Sensitive
group_18023	CHAP domain containing protein;CHAP domain-containing protein;phage tail tip lysozyme	6	14	49	31	0.0221017	0.285266	-1.80962	0.109091	0.311111	-0.20202	0.440452	Not significant	Enriched in Sensitive
group_2647	FAD:protein FMN transferase	6	14	49	31	0.0221017	0.285266	-1.80962	0.109091	0.311111	-0.20202	0.440452	Not significant	Enriched in Sensitive
group_586	Plasmid mobilization relaxosome protein MobC;Bacterial mobilisation domain-containing protein	6	14	49	31	0.0221017	0.285266	-1.80962	0.109091	0.311111	-0.20202	0.440452	Not significant	Enriched in Sensitive
group_719	SAG1252 family conjugative relaxosome accessory protein	6	14	49	31	0.0221017	0.285266	-1.80962	0.109091	0.311111	-0.20202	0.440452	Not significant	Enriched in Sensitive
icd	NADP-dependent isocitrate dehydrogenase;hypothetical protein	6	14	49	31	0.0221017	0.285266	-1.80962	0.109091	0.311111	-0.20202	0.440452	Not significant	Enriched in Sensitive
group_21223	DUF3169 domain-containing protein	15	4	40	41	0.022565	3.52949	1.81946	0.272727	0.0888889	0.183838	0.440452	Not significant	Not significant
ecfT~~~mtsC~~~cbiQ	Energy-coupling factor transporter transmembrane protein EcfT;Cobalt ABC transporter;Transmembrane component MtsC of energizing module of methionine-regulated ECF transporter;Cobalt transport protein;ABC transporter permease protein;ECF-type transporter transmembrane protein EcfT;Cobalamin biosynthesis protein CbiQ;CbiQ family ECF transporter T component;Cobalt ABC transporter permease	29	34	26	11	0.0227486	0.371069	-1.43024	0.527273	0.755556	-0.228283	0.440452	Not significant	Enriched in Sensitive
celC~~~bigG	PTS cellobiose transporter subunit IIA;BigG family transcription antiterminator	4	11	51	34	0.0236002	0.262136	-1.93161	0.0727273	0.244444	-0.171717	0.440452	Not significant	Not significant
group_1672	DUF2798 domain-containing protein	4	11	51	34	0.0236002	0.262136	-1.93161	0.0727273	0.244444	-0.171717	0.440452	Not significant	Not significant
group_20116	hypothetical protein;ABC-2 family transporter protein;ABC transporter permease;ABC-type transport system involved in multi-copper enzyme maturation permease component	4	11	51	34	0.0236002	0.262136	-1.93161	0.0727273	0.244444	-0.171717	0.440452	Not significant	Not significant
group_20599	ABC-type polysaccharide/polyol phosphate transport system ATPase component	4	11	51	34	0.0236002	0.262136	-1.93161	0.0727273	0.244444	-0.171717	0.440452	Not significant	Not significant
group_2936	MtN3/saliva family protein	4	11	51	34	0.0236002	0.262136	-1.93161	0.0727273	0.244444	-0.171717	0.440452	Not significant	Not significant
group_2956	PTS cellobiose transporter subunit IIB	4	11	51	34	0.0236002	0.262136	-1.93161	0.0727273	0.244444	-0.171717	0.440452	Not significant	Not significant
group_2706	DNA-binding response regulator;Response regulator transcription factor;Response regulator;Putative response regulator;Response regulatory domain-containing protein;Response regulator receiver domain protein;hypothetical protein	35	38	20	7	0.0241624	0.337346	-1.5677	0.636364	0.844444	-0.208081	0.440452	Not significant	Enriched in Sensitive
murB	UDP-N-acetylmuramate dehydrogenase;UDP-N-acetylenolpyruvoylglucosamine reductase	38	40	17	5	0.0276308	0.298765	-1.74291	0.690909	0.888889	-0.19798	0.440452	Not significant	Not significant
potA	Spermidine/putrescine import ATP-binding protein PotA	38	40	17	5	0.0276308	0.298765	-1.74291	0.690909	0.888889	-0.19798	0.440452	Not significant	Not significant
potB	Spermidine/putrescine ABC transporter permease protein;ABC transporter permease protein;Spermidine/putrescine ABC transporter membrane-spanning permease;ABC transmembrane type-1 domain-containing protein;ABC-type spermidine/putrescine transport system permease component I	38	40	17	5	0.0276308	0.298765	-1.74291	0.690909	0.888889	-0.19798	0.440452	Not significant	Not significant
potD	ABC transporter solute-binding protein;Spermidine/putrescine ABC transporter spermidine/putrescine-binding protein putative;ABC transporter solute-binding domain protein;ABC transporter periplasmic spermidineputrescine-binding protein PotD;Spermidine/putrescine-binding periplasmic protein;ABC transporter periplasmic spermidine putrescine-binding protein PotD;Bacterial extracellular solute-binding…	38	40	17	5	0.0276308	0.298765	-1.74291	0.690909	0.888889	-0.19798	0.440452	Not significant	Not significant
ydcV~~~potC	ABC transmembrane type-1 domain-containing protein;Inner membrane ABC transporter permease protein YdcV;Spermidine/putrescine ABC transporter membrane-spanning permease;ABC transporter permease;ABC-type spermidine/putrescine transport system permease component II	38	40	17	5	0.0276308	0.298765	-1.74291	0.690909	0.888889	-0.19798	0.440452	Not significant	Not significant
clcA	chloride channel protein;ClC family H(+)/Cl(-) exchange transporter;RCK C-terminal domain-containing protein;H(+)/Cl(-) exchange transporter ClcA;Voltage-gated chloride channel family protein;H+/Cl- antiporter ClcA;Voltage gated chloride channel family protein	42	42	13	3	0.0278328	0.259259	-1.94753	0.763636	0.933333	-0.169697	0.440452	Not significant	Not significant
group_2831	30S ribosomal protein S10	42	42	13	3	0.0278328	0.259259	-1.94753	0.763636	0.933333	-0.169697	0.440452	Not significant	Not significant
group_2921	Glutamine amidotransferase class I;Glutamine amidotransferase;Gamma-glutamyl-gamma-aminobutyrate hydrolase family protein;Peptidase C26;Peptidase C26 domain protein;Gamma-glutamyl-gamma-aminobutyrate hydrolase PuuD (putrescine degradation) contains GATase1-like domain	42	42	13	3	0.0278328	0.259259	-1.94753	0.763636	0.933333	-0.169697	0.440452	Not significant	Not significant
metF	methylenetetrahydrofolate reductase [NAD(P)H];hypothetical protein;Methylenetetrahydrofolate reductase	42	42	13	3	0.0278328	0.259259	-1.94753	0.763636	0.933333	-0.169697	0.440452	Not significant	Not significant
group_1302	molecular chaperone DnaJ;Chaperone protein DnaJ;DnaJ domain-containing protein	34	37	21	8	0.0287059	0.363721	-1.4591	0.618182	0.822222	-0.20404	0.440452	Not significant	Enriched in Sensitive
macP	cell wall synthase accessory phosphoprotein MacP	34	37	21	8	0.0287059	0.363721	-1.4591	0.618182	0.822222	-0.20404	0.440452	Not significant	Enriched in Sensitive
sfcA	malolactic enzyme	21	8	34	37	0.0287059	2.74936	1.4591	0.381818	0.177778	0.20404	0.440452	Not significant	Enriched in Resistant
group_19942	transcriptional regulator;Transcriptional regulator	7	14	48	31	0.0289197	0.33594	-1.57372	0.127273	0.311111	-0.183838	0.440452	Not significant	Not significant
group_2124	Lipopolysaccharide assembly protein A domain-containing protein	7	14	48	31	0.0289197	0.33594	-1.57372	0.127273	0.311111	-0.183838	0.440452	Not significant	Not significant
group_2196	Endo-beta-N-acetylglucosaminidase;Mannosyl-glycoprotein endo-beta-N-acetylglucosaminidase;glucosaminidase domain-containing protein;Putative mannosyl-glycoprotein endo-beta-N-acetylglucosaminidase;Putative endo-beta-N-acetylglucosaminidase	7	14	48	31	0.0289197	0.33594	-1.57372	0.127273	0.311111	-0.183838	0.440452	Not significant	Not significant
lacT~~~bglG	Transcription antiterminator;Transcription antiterminator LacT;Antiterminator protein;PRD domain protein;Transcriptional antiterminator;transcription antiterminator;PRD domain-containing protein	32	36	23	9	0.030479	0.359953	-1.47412	0.581818	0.8	-0.218182	0.440452	Not significant	Enriched in Sensitive
group_10908	Membrane associated protein	6	0	49	45	0.0311519	11.9495	3.57888	0.109091	0	0.109091	0.440452	Not significant	Not significant
group_11314	DUF5640 domain-containing protein	6	0	49	45	0.0311519	11.9495	3.57888	0.109091	0	0.109091	0.440452	Not significant	Not significant
group_1313	Polymerase;HTTM domain-containing protein	6	0	49	45	0.0311519	11.9495	3.57888	0.109091	0	0.109091	0.440452	Not significant	Not significant
group_13995	DNA-binding transcriptional activator PspC	6	0	49	45	0.0311519	11.9495	3.57888	0.109091	0	0.109091	0.440452	Not significant	Not significant
group_16368	Sensor histidine kinase	6	0	49	45	0.0311519	11.9495	3.57888	0.109091	0	0.109091	0.440452	Not significant	Not significant
group_16437	PF03729 repeat protein;Histidine kinase	6	0	49	45	0.0311519	11.9495	3.57888	0.109091	0	0.109091	0.440452	Not significant	Not significant
group_16703	Membrane protein 6-pyruvoyl-tetrahydropterin synthase-related domain-containing protein	6	0	49	45	0.0311519	11.9495	3.57888	0.109091	0	0.109091	0.440452	Not significant	Not significant
group_16790	Uncharacterized membrane protein	6	0	49	45	0.0311519	11.9495	3.57888	0.109091	0	0.109091	0.440452	Not significant	Not significant
group_1701	DNA-directed RNA polymerase omega subunit;YSIRK signal domain/LPXTG anchor domain surface protein;Pilin isopeptide linkage domain protein;FctA domain-containing protein	6	0	49	45	0.0311519	11.9495	3.57888	0.109091	0	0.109091	0.440452	Not significant	Not significant
group_17124	CrcB family protein	6	0	49	45	0.0311519	11.9495	3.57888	0.109091	0	0.109091	0.440452	Not significant	Not significant
group_1735	hypothetical protein;Replication initiator protein;Replication initiation protein;replication initiation protein	6	0	49	45	0.0311519	11.9495	3.57888	0.109091	0	0.109091	0.440452	Not significant	Not significant
group_1829	Autolysin;Gametolysin	6	0	49	45	0.0311519	11.9495	3.57888	0.109091	0	0.109091	0.440452	Not significant	Not significant
group_18309	Oligopeptide ABC uptake transporter substrate-binding protein	6	0	49	45	0.0311519	11.9495	3.57888	0.109091	0	0.109091	0.440452	Not significant	Not significant
group_18484	Bacteriocin;Bacteriocin class II with double-glycine leader peptide	6	0	49	45	0.0311519	11.9495	3.57888	0.109091	0	0.109091	0.440452	Not significant	Not significant
group_18826	Glucosyl transferase	6	0	49	45	0.0311519	11.9495	3.57888	0.109091	0	0.109091	0.440452	Not significant	Not significant
group_18943	Aminoacyltransferase	6	0	49	45	0.0311519	11.9495	3.57888	0.109091	0	0.109091	0.440452	Not significant	Not significant
group_19214	SAM-dependent methyltransferase;Methyltransferase	6	0	49	45	0.0311519	11.9495	3.57888	0.109091	0	0.109091	0.440452	Not significant	Not significant
group_19530	DUF805 domain-containing protein	6	0	49	45	0.0311519	11.9495	3.57888	0.109091	0	0.109091	0.440452	Not significant	Not significant
group_19540	DUF2207 domain-containing protein	6	0	49	45	0.0311519	11.9495	3.57888	0.109091	0	0.109091	0.440452	Not significant	Not significant
group_19613	LPXTG cell wall anchor domain-containing protein;Peptidoglycan-binding protein	6	0	49	45	0.0311519	11.9495	3.57888	0.109091	0	0.109091	0.440452	Not significant	Not significant
group_19643	Neutral endopeptidase (Endopeptidase O)	6	0	49	45	0.0311519	11.9495	3.57888	0.109091	0	0.109091	0.440452	Not significant	Not significant
group_19648	HTH lacI-type domain-containing protein	6	0	49	45	0.0311519	11.9495	3.57888	0.109091	0	0.109091	0.440452	Not significant	Not significant
group_20041	HTH-type transcriptional repressor KstR2;Putative transcriptional regulator (TetR family)	6	0	49	45	0.0311519	11.9495	3.57888	0.109091	0	0.109091	0.440452	Not significant	Not significant
group_20047	Glucosyl transferase	6	0	49	45	0.0311519	11.9495	3.57888	0.109091	0	0.109091	0.440452	Not significant	Not significant
group_20675	hypothetical protein;CAAX protease self-immunity;CPBP family intramembrane metalloprotease;CPBP family intramembrane glutamic endopeptidase	6	0	49	45	0.0311519	11.9495	3.57888	0.109091	0	0.109091	0.440452	Not significant	Not significant
group_20734	Transcriptional regulator	6	0	49	45	0.0311519	11.9495	3.57888	0.109091	0	0.109091	0.440452	Not significant	Not significant
group_21338	Transcriptional regulator;HTH cro/C1-type domain-containing protein;Helix-turn-helix transcriptional regulator	6	0	49	45	0.0311519	11.9495	3.57888	0.109091	0	0.109091	0.440452	Not significant	Not significant
group_21369	Bacteriocin secretion protein	6	0	49	45	0.0311519	11.9495	3.57888	0.109091	0	0.109091	0.440452	Not significant	Not significant
group_21585	Glucosyl transferase;Glucosyltransferase-I	6	0	49	45	0.0311519	11.9495	3.57888	0.109091	0	0.109091	0.440452	Not significant	Not significant
group_21684	ABC transporter ATP-binding protein;ABC transporter domain-containing protein	6	0	49	45	0.0311519	11.9495	3.57888	0.109091	0	0.109091	0.440452	Not significant	Not significant
group_2248	protein-ADP-ribose hydrolase	6	0	49	45	0.0311519	11.9495	3.57888	0.109091	0	0.109091	0.440452	Not significant	Not significant
group_2250	Pyridoxamine 5'-phosphate oxidase	6	0	49	45	0.0311519	11.9495	3.57888	0.109091	0	0.109091	0.440452	Not significant	Not significant
group_2251	Deacetylase sirtuin-type domain-containing protein	6	0	49	45	0.0311519	11.9495	3.57888	0.109091	0	0.109091	0.440452	Not significant	Not significant
group_2271	Phage protein	6	0	49	45	0.0311519	11.9495	3.57888	0.109091	0	0.109091	0.440452	Not significant	Not significant
group_2272	HNH endonuclease signature motif containing protein;hypothetical protein;HNH endonuclease;HNH nuclease domain-containing protein	6	0	49	45	0.0311519	11.9495	3.57888	0.109091	0	0.109091	0.440452	Not significant	Not significant
group_289	Membrane protein	6	0	49	45	0.0311519	11.9495	3.57888	0.109091	0	0.109091	0.440452	Not significant	Not significant
group_57	RDD domain-containing protein;RDD family protein	6	0	49	45	0.0311519	11.9495	3.57888	0.109091	0	0.109091	0.440452	Not significant	Not significant
ybhR	Inner membrane transport permease YbhR	6	0	49	45	0.0311519	11.9495	3.57888	0.109091	0	0.109091	0.440452	Not significant	Not significant
yttP	Putative HTH-type transcriptional regulator YttP	6	0	49	45	0.0311519	11.9495	3.57888	0.109091	0	0.109091	0.440452	Not significant	Not significant
group_1667	DUF6017 domain-containing protein;Putative transposon protein	3	9	52	36	0.0327451	0.25614	-1.96499	0.0545455	0.2	-0.145455	0.440452	Not significant	Not significant
group_1677	Succinate dehydrogenase	3	9	52	36	0.0327451	0.25614	-1.96499	0.0545455	0.2	-0.145455	0.440452	Not significant	Not significant
group_17462	hypothetical protein	3	9	52	36	0.0327451	0.25614	-1.96499	0.0545455	0.2	-0.145455	0.440452	Not significant	Not significant
group_19751	hypothetical protein;5-methylcytosine-specific restriction enzyme subunit McrC;3-isopropylmalate dehydrogenase;McrBC 5-methylcytosine restriction system component family protein	3	9	52	36	0.0327451	0.25614	-1.96499	0.0545455	0.2	-0.145455	0.440452	Not significant	Not significant
group_19905	Putative tryptophan synthase subunit beta;tryptophan synthase subunit beta;Tryptophan synthase subunit beta;tryptophan synthase	3	9	52	36	0.0327451	0.25614	-1.96499	0.0545455	0.2	-0.145455	0.440452	Not significant	Not significant
group_20612	Putative peptidoglycan branched peptide synthesis protein;tRNA-dependent lipid II-Ala--L-alanine ligase;Aminoacyltransferase FemA;Transposase;tRNA-dependent ligase;aminoacyltransferase	3	9	52	36	0.0327451	0.25614	-1.96499	0.0545455	0.2	-0.145455	0.440452	Not significant	Not significant
group_21016	Competence-specific global transcription modulator;sigma-70 family RNA polymerase sigma factor;Transcriptional regulator;Transcriptional regulator ComX1	3	9	52	36	0.0327451	0.25614	-1.96499	0.0545455	0.2	-0.145455	0.440452	Not significant	Not significant
group_235	DUF4313 domain-containing protein	3	9	52	36	0.0327451	0.25614	-1.96499	0.0545455	0.2	-0.145455	0.440452	Not significant	Not significant
pcfB	PF12687 family protein;Conjugal transfer protein;PcfB family protein	3	9	52	36	0.0327451	0.25614	-1.96499	0.0545455	0.2	-0.145455	0.440452	Not significant	Not significant
yafY	YafY family transcriptional regulator;HTH deoR-type domain-containing protein;WYL domain-containing protein;DNA-bind protein	3	9	52	36	0.0327451	0.25614	-1.96499	0.0545455	0.2	-0.145455	0.440452	Not significant	Not significant
group_13516	Conjugative transposon protein	8	15	47	30	0.032812	0.352122	-1.50585	0.145455	0.333333	-0.187879	0.440452	Not significant	Not significant
group_15605	Conjugal transfer protein;Conjugative transposon membrane protein	8	15	47	30	0.032812	0.352122	-1.50585	0.145455	0.333333	-0.187879	0.440452	Not significant	Not significant
group_17931	Antirestriction protein ArdA;antirestriction protein ArdA	8	15	47	30	0.032812	0.352122	-1.50585	0.145455	0.333333	-0.187879	0.440452	Not significant	Not significant
group_18034	ATP/GTP-binding protein;Type IV secretory pathway VirB4 component	8	15	47	30	0.032812	0.352122	-1.50585	0.145455	0.333333	-0.187879	0.440452	Not significant	Not significant
group_19047	Membrane protease YdiL CAAX protease family	8	15	47	30	0.032812	0.352122	-1.50585	0.145455	0.333333	-0.187879	0.440452	Not significant	Not significant
group_19261	DNA segregation ATPase FtsK/SpoIIIE or related protein;DNA translocase FtsK	8	15	47	30	0.032812	0.352122	-1.50585	0.145455	0.333333	-0.187879	0.440452	Not significant	Not significant
group_19306	Replication initiator A N-terminal domain-containing protein	8	15	47	30	0.032812	0.352122	-1.50585	0.145455	0.333333	-0.187879	0.440452	Not significant	Not significant
group_19310	DUF3084 domain-containing protein;Conj_TIGR03752: integrating conjugative element protein PFL_4705;YtxH domain-containing protein;Conjugative transposon membrane protein	8	15	47	30	0.032812	0.352122	-1.50585	0.145455	0.333333	-0.187879	0.440452	Not significant	Not significant
group_19340	Tn5253 bacteriocine	8	15	47	30	0.032812	0.352122	-1.50585	0.145455	0.333333	-0.187879	0.440452	Not significant	Not significant
group_20068	Conjugal transfer protein;Conjugative transposon protein	8	15	47	30	0.032812	0.352122	-1.50585	0.145455	0.333333	-0.187879	0.440452	Not significant	Not significant
group_20568	DUF961 domain-containing protein	8	15	47	30	0.032812	0.352122	-1.50585	0.145455	0.333333	-0.187879	0.440452	Not significant	Not significant
group_21329	Phosphoribulokinase/Uridine kinase family protein;Phosphoribulokinase/uridine kinase domain-containing protein;Phosphoribulokinase / Uridine kinase family;Uridine kinase;hypothetical protein;Putative phosphoribulokinase/uridine kinase;phosphoribulokinase	8	15	47	30	0.032812	0.352122	-1.50585	0.145455	0.333333	-0.187879	0.440452	Not significant	Not significant
mobT	MobT family relaxase	8	15	47	30	0.032812	0.352122	-1.50585	0.145455	0.333333	-0.187879	0.440452	Not significant	Not significant
group_21218	DUF2992 domain-containing protein	18	6	37	39	0.0335372	2.99795	1.58398	0.327273	0.133333	0.193939	0.440452	Not significant	Not significant
yoaK	DUF1275 domain-containing protein;YoaK family protein	11	2	44	43	0.0337631	4.49663	2.16884	0.2	0.0444444	0.155556	0.440452	Not significant	Not significant
aroB~~~aroE	3-dehydroquinate synthase;shikimate dehydrogenase;iron-containing alcohol dehydrogenase;hypothetical protein	44	43	11	2	0.0337631	0.222389	-2.16884	0.8	0.955556	-0.155556	0.440452	Not significant	Not significant
aroC	chorismate synthase;hypothetical protein	44	43	11	2	0.0337631	0.222389	-2.16884	0.8	0.955556	-0.155556	0.440452	Not significant	Not significant
aroD	3-dehydroquinate dehydratase	44	43	11	2	0.0337631	0.222389	-2.16884	0.8	0.955556	-0.155556	0.440452	Not significant	Not significant
ccdA2~~~ccdA	thiol-disulfide oxidoreductase-associated membrane protein CcdA2;Cytochrome c-type biogenesis protein;Cytochrome c-type biogenesis protein CcdA;cytochrome c biogenesis protein CcdA;Cytochrome c biogenesis protein CcdA	44	43	11	2	0.0337631	0.222389	-2.16884	0.8	0.955556	-0.155556	0.440452	Not significant	Not significant
cls	cardiolipin synthase;Phospholipase D domain protein;Cardiolipin synthase	44	43	11	2	0.0337631	0.222389	-2.16884	0.8	0.955556	-0.155556	0.440452	Not significant	Not significant
coaC	phosphopantothenoylcysteine decarboxylase;Flavofamily protein;hypothetical protein	44	43	11	2	0.0337631	0.222389	-2.16884	0.8	0.955556	-0.155556	0.440452	Not significant	Not significant
divIVA	Cell division initiation protein DivIVA;DivIVA domain protein;Cell division protein DivIVA;DivIVA domain-containing protein;Cell division septum initiation protein DivIVA interacts with FtsZ and MinD	44	43	11	2	0.0337631	0.222389	-2.16884	0.8	0.955556	-0.155556	0.440452	Not significant	Not significant
ebsC	Cys-tRNA(Pro)/Cys-tRNA(Cys) deacylase;Cys-tRNA(Pro) deacylase prolyl-tRNA editing enzyme YbaK/EbsC;hypothetical protein	44	43	11	2	0.0337631	0.222389	-2.16884	0.8	0.955556	-0.155556	0.440452	Not significant	Not significant
gloB	MBL fold metallo-hydrolase;Putative metallo-hydrolase;Metallo-beta-lactamase domain-containing protein;Hydroxyacylglutathione hydrolase;Hydrolase;Glyoxylase or a related metal-dependent hydrolase beta-lactamase superfamily II;hypothetical protein	44	43	11	2	0.0337631	0.222389	-2.16884	0.8	0.955556	-0.155556	0.440452	Not significant	Not significant
group_17053	Peptide chain release factor 2;peptide chain release factor 2	44	43	11	2	0.0337631	0.222389	-2.16884	0.8	0.955556	-0.155556	0.440452	Not significant	Not significant
group_19335	30S ribosomal protein S15	44	43	11	2	0.0337631	0.222389	-2.16884	0.8	0.955556	-0.155556	0.440452	Not significant	Not significant
group_1944	Thiol-disulfide isomerase/thioredoxins;Bacteriocin transport accessory protein;Thiol reductase thioredoxin;Putative bacteriocin transport accessory protein	44	43	11	2	0.0337631	0.222389	-2.16884	0.8	0.955556	-0.155556	0.440452	Not significant	Not significant
group_2104	bifunctional acetaldehyde-CoA/alcohol dehydrogenase;iron-containing alcohol dehydrogenase	44	43	11	2	0.0337631	0.222389	-2.16884	0.8	0.955556	-0.155556	0.440452	Not significant	Not significant
group_2244	isoleucine--tRNA ligase;Isoleucyl-tRNA synthetase	44	43	11	2	0.0337631	0.222389	-2.16884	0.8	0.955556	-0.155556	0.440452	Not significant	Not significant
group_2749	Anaerobic ribonucleoside-triphosphate reductase;hypothetical protein;Ribonucleotide reductase of class III (Anaerobic) large subunit	44	43	11	2	0.0337631	0.222389	-2.16884	0.8	0.955556	-0.155556	0.440452	Not significant	Not significant
group_2765	DUF1803 domain-containing protein;Hypothetical cytosolic protein	44	43	11	2	0.0337631	0.222389	-2.16884	0.8	0.955556	-0.155556	0.440452	Not significant	Not significant
group_2950	Serine/threonine-protein kinase MRCK beta;DUF2130 domain-containing protein	44	43	11	2	0.0337631	0.222389	-2.16884	0.8	0.955556	-0.155556	0.440452	Not significant	Not significant
guaA	glutamine-hydrolyzing GMP synthase;GMP synthase (glutamine-hydrolyzing);hypothetical protein;Putative GMP synthase [glutamine-hydrolyzing] 2;GMP synthase (Glutamine-hydrolyzing)	44	43	11	2	0.0337631	0.222389	-2.16884	0.8	0.955556	-0.155556	0.440452	Not significant	Not significant
lysS	lysine--tRNA ligase;Lysine--tRNA ligase	44	43	11	2	0.0337631	0.222389	-2.16884	0.8	0.955556	-0.155556	0.440452	Not significant	Not significant
murE	UDP-N-acetylmuramoyl-L-alanyl-D-glutamate--L-lysine ligase;UDP-N-acetylmuramoylalanyl-D-glutamate--L-lysine ligase;UDP-N-acetylmuramoyl-alanyl-D-glutamate-2 6-diaminopimelate ligase;UDP-N-acetylmuramoylalanyl-D-glutamate-L-lysine ligase	44	43	11	2	0.0337631	0.222389	-2.16884	0.8	0.955556	-0.155556	0.440452	Not significant	Not significant
mutY	A/G-specific adenine glycosylase;Adenine DNA glycosylase	44	43	11	2	0.0337631	0.222389	-2.16884	0.8	0.955556	-0.155556	0.440452	Not significant	Not significant
nox	NADH oxidase;H2O-forming NADH dehydrogenase putative;Pyridine nucleotide-disulfide oxidoreductase dimerization domain protein;NAD(P)/FAD-dependent oxidoreductase	44	43	11	2	0.0337631	0.222389	-2.16884	0.8	0.955556	-0.155556	0.440452	Not significant	Not significant
patB~~~malY	Aminotransferase class II;Aminotransferase class I/classII domain-containing protein;Aspartate aminotransferase;Cystathionine beta-lyase PatB;Aminotransferase class I/II;Cystathione beta-lyase;Putative aminotransferase;Bifunctional PLP-dependent enzyme with beta-cystathionase and maltose regulon repressor activities;MalY/PatB family protein	44	43	11	2	0.0337631	0.222389	-2.16884	0.8	0.955556	-0.155556	0.440452	Not significant	Not significant
pepT	peptidase T;Peptidase T;tripeptide aminopeptidase	44	43	11	2	0.0337631	0.222389	-2.16884	0.8	0.955556	-0.155556	0.440452	Not significant	Not significant
plsY	glycerol-3-phosphate 1-O-acyltransferase PlsY;Glycerol-3-phosphate acyltransferase	44	43	11	2	0.0337631	0.222389	-2.16884	0.8	0.955556	-0.155556	0.440452	Not significant	Not significant
ppaC~~~pPX1	manganese-dependent inorganic pyrophosphatase;hypothetical protein	44	43	11	2	0.0337631	0.222389	-2.16884	0.8	0.955556	-0.155556	0.440452	Not significant	Not significant
rlhA	Protease;Putative protease;Collagenase-like protease;Peptidase U32 family;23S rRNA C2501 and tRNA U34 5'-hydroxylation protein RlhA/YrrN/YrrO U32 peptidase family;peptidase U32 family protein	44	43	11	2	0.0337631	0.222389	-2.16884	0.8	0.955556	-0.155556	0.440452	Not significant	Not significant
rlmI	S-adenosylmethionine-dependent methyltransferase;PUA domain-containing protein;Class I SAM-dependent rRNA methyltransferase;Putative SAM-dependent methyl transferase;23S rRNA methyltransferase;23S rRNA G2069 N7-methylase RlmK or C1962 C5-methylase RlmI;Methyltransferase;class I SAM-dependent rRNA methyltransferase;Ribosomal RNA large subunit methyltransferase I	44	43	11	2	0.0337631	0.222389	-2.16884	0.8	0.955556	-0.155556	0.440452	Not significant	Not significant
truB	tRNA pseudouridine(55) synthase TruB;hypothetical protein;tRNA pseudouridine(55) synthase;tRNA pseudouridine synthase B	44	43	11	2	0.0337631	0.222389	-2.16884	0.8	0.955556	-0.155556	0.440452	Not significant	Not significant
tyrA	prephenate dehydrogenase;Prephenate dehydrogenase	44	43	11	2	0.0337631	0.222389	-2.16884	0.8	0.955556	-0.155556	0.440452	Not significant	Not significant
yfkJ~~~wzb	Protein-tyrosine-phosphatase;Low molecular weight protein-tyrosine-phosphatase YfkJ;Low molecular weight phosphotyrosine protein phosphatase;Phosphotyrosine protein phosphatase I domain-containing protein;Putative phosphotyrosine protein phosphatase;MORN repeat protein;hypothetical protein;Low molecular weight protein tyrosine phosphatase;protein-tyrosine-phosphatase;MORN motif family protein	44	43	11	2	0.0337631	0.222389	-2.16884	0.8	0.955556	-0.155556	0.440452	Not significant	Not significant
yhbU~~~rlhA	U32 family peptidase;Protease;Peptidase family U32 C-terminal domain-containing protein;Putative protease YhbU;Putative protease;peptidase U32 family protein;Peptidase U32;23S rRNA C2501 and tRNA U34 5'-hydroxylation protein RlhA/YrrN/YrrO U32 peptidase family	44	43	11	2	0.0337631	0.222389	-2.16884	0.8	0.955556	-0.155556	0.440452	Not significant	Not significant
yjbM	GTP diphosphokinase;hypothetical protein;GTP pyrophosphokinase;ppGpp synthetase catalytic domain (RelA/SpoT-type nucleotidyltranferase);GTP pyrophosphokinase YjbM	44	43	11	2	0.0337631	0.222389	-2.16884	0.8	0.955556	-0.155556	0.440452	Not significant	Not significant
ylbF	YlbF/YmcA family competence regulator	44	43	11	2	0.0337631	0.222389	-2.16884	0.8	0.955556	-0.155556	0.440452	Not significant	Not significant
ytgP~~~spoVB	Membrane protein involved in the export of O-antigen teichoic acid lipoteichoic acid;Putative cell division protein YtgP;Polysaccharide biosynthesis protein C-terminal domain-containing protein;Polysaccharide transporter;Stage V sporulation protein SpoVB/SpoIIIF required for spore cortex synthesis;polysaccharide biosynthesis C-terminal domain-containing protein;polysaccharide biosynthesis protein…	44	43	11	2	0.0337631	0.222389	-2.16884	0.8	0.955556	-0.155556	0.440452	Not significant	Not significant
group_2848	pyruvate phosphate dikinase;Pyruvate phosphate dikinase	13	20	42	25	0.0338166	0.395122	-1.33963	0.236364	0.444444	-0.208081	0.440452	Not significant	Enriched in Sensitive
group_20585	Conjugative transposon protein;Conjugative transposon protein TcpC	9	16	46	29	0.0368386	0.365266	-1.45298	0.163636	0.355556	-0.191919	0.440452	Not significant	Not significant
group_2125	DUF1934 domain-containing protein;50S ribosomal protein L19	9	16	46	29	0.0368386	0.365266	-1.45298	0.163636	0.355556	-0.191919	0.440452	Not significant	Not significant
group_2319	DUF308 domain-containing protein;hypothetical protein;Putative membrane protein (TMS5)	9	16	46	29	0.0368386	0.365266	-1.45298	0.163636	0.355556	-0.191919	0.440452	Not significant	Not significant
group_2472	aspartate--tRNA ligase	9	16	46	29	0.0368386	0.365266	-1.45298	0.163636	0.355556	-0.191919	0.440452	Not significant	Not significant
group_2961	bifunctional riboflavin kinase/FAD synthetase	9	16	46	29	0.0368386	0.365266	-1.45298	0.163636	0.355556	-0.191919	0.440452	Not significant	Not significant
group_3091	transcription elongation factor GreA	9	16	46	29	0.0368386	0.365266	-1.45298	0.163636	0.355556	-0.191919	0.440452	Not significant	Not significant
group_3100	Putative tRNA/rRNA methyltransferase;RNA 2-O ribose methyltransferase substrate binding domain-containing protein;Putative rRNA methylase	9	16	46	29	0.0368386	0.365266	-1.45298	0.163636	0.355556	-0.191919	0.440452	Not significant	Not significant
group_3101	HD domain-containing protein;HD/PDEase domain-containing protein	9	16	46	29	0.0368386	0.365266	-1.45298	0.163636	0.355556	-0.191919	0.440452	Not significant	Not significant
group_3102	acylphosphatase	9	16	46	29	0.0368386	0.365266	-1.45298	0.163636	0.355556	-0.191919	0.440452	Not significant	Not significant
group_7099	GNAT family N-acetyltransferase;Acetyltransferase GNAT family;N-acetyltransferase domain-containing protein	9	16	46	29	0.0368386	0.365266	-1.45298	0.163636	0.355556	-0.191919	0.440452	Not significant	Not significant
group_722	Helix-turn-helix conjugative transposon-like domain-containing protein	9	16	46	29	0.0368386	0.365266	-1.45298	0.163636	0.355556	-0.191919	0.440452	Not significant	Not significant
hipB~~~xRE	Transcriptional regulator contains XRE-family HTH domain;DNA-binding transcriptional regulator XRE-family HTH domain	9	16	46	29	0.0368386	0.365266	-1.45298	0.163636	0.355556	-0.191919	0.440452	Not significant	Not significant
int	Transposase from transposon Tn1545	9	16	46	29	0.0368386	0.365266	-1.45298	0.163636	0.355556	-0.191919	0.440452	Not significant	Not significant
nlpC	Cell wall-associated hydrolase NlpC_P60 family;NlpC/P60 family lipoprotein;hypothetical protein	9	16	46	29	0.0368386	0.365266	-1.45298	0.163636	0.355556	-0.191919	0.440452	Not significant	Not significant
rpoE	DNA-directed RNA polymerase specialized sigma subunit sigma24 family	9	16	46	29	0.0368386	0.365266	-1.45298	0.163636	0.355556	-0.191919	0.440452	Not significant	Not significant
tetM~~~tetM	tetracycline resistance ribosomal protection protein Tet(M);Translation elongation factor EFG/EF2 domain-containing protein;Tetracycline resistance protein TetM from transposon Tn916	9	16	46	29	0.0368386	0.365266	-1.45298	0.163636	0.355556	-0.191919	0.440452	Not significant	Not significant
xis	DNA binding domain excisionase family;Excisionase from transposon Tn1545	9	16	46	29	0.0368386	0.365266	-1.45298	0.163636	0.355556	-0.191919	0.440452	Not significant	Not significant
ybhL	Inner membrane protein YbhL;Membrane protein	9	16	46	29	0.0368386	0.365266	-1.45298	0.163636	0.355556	-0.191919	0.440452	Not significant	Not significant
msrA~~~msrB~~~msrAB2	Peptide methionine sulfoxide reductase MsrA;hypothetical protein;bifunctional methionine sulfoxide reductase B/A protein;Peptide methionine sulfoxide reductase MsrB;Multifunctional fusion protein	41	41	14	4	0.0381919	0.310345	-1.68806	0.745455	0.911111	-0.165657	0.440452	Not significant	Not significant
group_20570	Na+ export ABC ABC transporter membrane-spanning permease;ABC-2 type transporter transmembrane domain-containing protein	14	4	41	41	0.0381919	3.22222	1.68806	0.254545	0.0888889	0.165657	0.440452	Not significant	Not significant
group_593	Peptidase E;Peptidase S51;Type 1 glutamine amidotransferase-like domain-containing protein;(Alpha)-aspartyl dipeptidase	14	4	41	41	0.0381919	3.22222	1.68806	0.254545	0.0888889	0.165657	0.440452	Not significant	Not significant
group_1674	2-succinyl-6-hydroxy-2 4-cyclohexadiene-1-carboxylate synthase;Putative hydrolase protein;Alpha/beta hydrolase;alpha/beta hydrolase;AB hydrolase-1 domain-containing protein;Acetoin dehydrogenase E2 subunit dihydrolipoyllysine-residue acetyltransferase	6	13	49	32	0.0385572	0.316124	-1.66144	0.109091	0.288889	-0.179798	0.440452	Not significant	Not significant
group_754	L-2-hydroxyisocaproate dehydrogenase;Malate/lactate dehydrogenase;L-lactate dehydrogenase	6	13	49	32	0.0385572	0.316124	-1.66144	0.109091	0.288889	-0.179798	0.440452	Not significant	Not significant
group_14513	50S ribosomal protein L33	8	1	47	44	0.0388441	5.30877	2.40838	0.145455	0.0222222	0.123232	0.440452	Not significant	Not significant
group_164	DUF3278 domain-containing protein;Gram-positive signal peptide protein YSIRK family	8	1	47	44	0.0388441	5.30877	2.40838	0.145455	0.0222222	0.123232	0.440452	Not significant	Not significant
group_17051	PRD domain-containing protein	8	1	47	44	0.0388441	5.30877	2.40838	0.145455	0.0222222	0.123232	0.440452	Not significant	Not significant
group_21545	SGNH domain-containing protein;GDSL-like protein;SGNH hydrolase-type esterase domain-containing protein	8	1	47	44	0.0388441	5.30877	2.40838	0.145455	0.0222222	0.123232	0.440452	Not significant	Not significant
group_21556	ABC3 transporter permease protein domain-containing protein;hypothetical protein	8	1	47	44	0.0388441	5.30877	2.40838	0.145455	0.0222222	0.123232	0.440452	Not significant	Not significant
group_331	ABC transporter domain-containing protein	8	1	47	44	0.0388441	5.30877	2.40838	0.145455	0.0222222	0.123232	0.440452	Not significant	Not significant
group_18972	YolD-like protein	2	8	53	37	0.0397106	0.206157	-2.27818	0.0363636	0.177778	-0.141414	0.440452	Not significant	Not significant
group_19498	PTS cellobiose transporter subunit IIA	2	8	53	37	0.0397106	0.206157	-2.27818	0.0363636	0.177778	-0.141414	0.440452	Not significant	Not significant
group_19891	ImpB/MucB/SamB family protein;DNA polymerase IV;ImpB/mucB/samB family C-terminal domain protein	2	8	53	37	0.0397106	0.206157	-2.27818	0.0363636	0.177778	-0.141414	0.440452	Not significant	Not significant
group_19892	Replication initiator A N-terminal domain-containing protein	2	8	53	37	0.0397106	0.206157	-2.27818	0.0363636	0.177778	-0.141414	0.440452	Not significant	Not significant
group_20463	HTH cro/C1-type domain-containing protein;Peptidase S24-like protein;Conserved domain protein	2	8	53	37	0.0397106	0.206157	-2.27818	0.0363636	0.177778	-0.141414	0.440452	Not significant	Not significant
group_20668	Putative transcriptional regulator;Putative licABCH operon regulator	2	8	53	37	0.0397106	0.206157	-2.27818	0.0363636	0.177778	-0.141414	0.440452	Not significant	Not significant
group_443	Recombinase family protein;Site-specific DNA recombinase SpoIVCA/DNA invertase PinE	2	8	53	37	0.0397106	0.206157	-2.27818	0.0363636	0.177778	-0.141414	0.440452	Not significant	Not significant
group_760	Cell filamentation protein Fic;Putative fic family protein;Protein adenylyltransferase NmFic;Adenosine monophosphate-protein transferase NmFic;Protein involved in cell division;Cell filamentation protein	2	8	53	37	0.0397106	0.206157	-2.27818	0.0363636	0.177778	-0.141414	0.440452	Not significant	Not significant
phtA	Pneumococcal histidine triad protein B;Histidine motif-containing protein;hypothetical protein;Pneumococcal histidine triad protein PhtA	2	8	53	37	0.0397106	0.206157	-2.27818	0.0363636	0.177778	-0.141414	0.440452	Not significant	Not significant
albF	Putative zinc protease AlbF;Peptidase M16 family;Zinc protease AlbF;Zinc-dependent protease	10	17	45	28	0.0409894	0.375824	-1.41187	0.181818	0.377778	-0.19596	0.440452	Not significant	Not significant
coaE	dephospho-CoA kinase	10	17	45	28	0.0409894	0.375824	-1.41187	0.181818	0.377778	-0.19596	0.440452	Not significant	Not significant
degV~~~trmH	DegV family protein;DegV domain-containing protein;DegV family protein in cluster with TrmH family tRNA/rRNA methyltransferase YacO	10	17	45	28	0.0409894	0.375824	-1.41187	0.181818	0.377778	-0.19596	0.440452	Not significant	Not significant
group_1245	histidine kinase;Sensor histidine kinase	10	17	45	28	0.0409894	0.375824	-1.41187	0.181818	0.377778	-0.19596	0.440452	Not significant	Not significant
group_1318	ribonuclease P protein component	10	17	45	28	0.0409894	0.375824	-1.41187	0.181818	0.377778	-0.19596	0.440452	Not significant	Not significant
group_1826	FemAB family protein;Beta-lactam resistance factor	10	17	45	28	0.0409894	0.375824	-1.41187	0.181818	0.377778	-0.19596	0.440452	Not significant	Not significant
group_1945	hydroxymethylglutaryl-CoA reductase degradative	10	17	45	28	0.0409894	0.375824	-1.41187	0.181818	0.377778	-0.19596	0.440452	Not significant	Not significant
group_1966	ATP-dependent nuclease subunit B;ATP-dependent helicase/deoxyribonuclease subunit B;exodeoxyribonuclease V subunit gamma	10	17	45	28	0.0409894	0.375824	-1.41187	0.181818	0.377778	-0.19596	0.440452	Not significant	Not significant
group_20242	aspartate--tRNA ligase;Putative aspartate--tRNA ligase	10	17	45	28	0.0409894	0.375824	-1.41187	0.181818	0.377778	-0.19596	0.440452	Not significant	Not significant
group_21653	LytTr DNA-binding domain protein;DNA-binding protein	10	17	45	28	0.0409894	0.375824	-1.41187	0.181818	0.377778	-0.19596	0.440452	Not significant	Not significant
group_2236	Glycerophosphodiester phosphodiesterase family protein;Glycerophosphoryl diester phosphodiesterase;Membrane-anchored glycerophosphoryl diester phosphodiesterase putative;GP-PDE domain-containing protein;Glycerophosphodiester phosphdiesterase family protein;glycerophosphoryl diester phosphodiesterase membrane domain-containing protein	10	17	45	28	0.0409894	0.375824	-1.41187	0.181818	0.377778	-0.19596	0.440452	Not significant	Not significant
group_2282	N-acetyltransferase domain-containing protein;GNAT family N-acetyltransferase;Phosphinothricin N-acetyltransferase;Acetyltransferase GNAT family	10	17	45	28	0.0409894	0.375824	-1.41187	0.181818	0.377778	-0.19596	0.440452	Not significant	Not significant
group_2461	Sulfate exporter family transporter	10	17	45	28	0.0409894	0.375824	-1.41187	0.181818	0.377778	-0.19596	0.440452	Not significant	Not significant
group_2525	Fe-S cluster assembly protein SufB	10	17	45	28	0.0409894	0.375824	-1.41187	0.181818	0.377778	-0.19596	0.440452	Not significant	Not significant
group_2526	Tetratricopeptide repeat protein;TPR domain-containing protein	10	17	45	28	0.0409894	0.375824	-1.41187	0.181818	0.377778	-0.19596	0.440452	Not significant	Not significant
group_264	Kinase;Zeta toxin;AAA family ATPase;AAA+ ATPase domain-containing protein	10	17	45	28	0.0409894	0.375824	-1.41187	0.181818	0.377778	-0.19596	0.440452	Not significant	Not significant
group_2708	Beta-lactamase class A catalytic domain-containing protein;Serine hydrolase	10	17	45	28	0.0409894	0.375824	-1.41187	0.181818	0.377778	-0.19596	0.440452	Not significant	Not significant
group_2716	peptidylprolyl isomerase PrsA	10	17	45	28	0.0409894	0.375824	-1.41187	0.181818	0.377778	-0.19596	0.440452	Not significant	Not significant
group_2865	Niacin transporter NiaX	10	17	45	28	0.0409894	0.375824	-1.41187	0.181818	0.377778	-0.19596	0.440452	Not significant	Not significant
group_2960	Cation efflux family protein;Ferrous-iron efflux pump FieF;Cation efflux protein cytoplasmic domain-containing protein	10	17	45	28	0.0409894	0.375824	-1.41187	0.181818	0.377778	-0.19596	0.440452	Not significant	Not significant
group_3128	Ribosomal RNA small subunit methyltransferase H;Methyltransferase;16S rRNA (Cytosine(1402)-N(4))-methyltransferase	10	17	45	28	0.0409894	0.375824	-1.41187	0.181818	0.377778	-0.19596	0.440452	Not significant	Not significant
group_3129	TIGR01212 family radical SAM protein	10	17	45	28	0.0409894	0.375824	-1.41187	0.181818	0.377778	-0.19596	0.440452	Not significant	Not significant
group_6891	D-alanyl-D-alanine carboxypeptidase;DD-carboxypeptidase putative;Peptidase S11 D-alanyl-D-alanine carboxypeptidase A N-terminal domain-containing protein	10	17	45	28	0.0409894	0.375824	-1.41187	0.181818	0.377778	-0.19596	0.440452	Not significant	Not significant
group_7139	Methylated-DNA--[protein]-cysteine S-methyltransferase;Methylated-DNA--protein-cysteine methyltransferase;Methylated-DNA--protein-cysteine S-methyltransferase;MGMT family protein;Methylated-DNA methyltransferase;Methylated-DNA-[protein]-cysteine S-methyltransferase DNA-binding domain protein;DNA-binding domain methylated-DNA-[protein]-cysteine S-methyltransferase family protein;DNA methyltransfer…	10	17	45	28	0.0409894	0.375824	-1.41187	0.181818	0.377778	-0.19596	0.440452	Not significant	Not significant
nagB	glucosamine-6-phosphate deaminase;Glucosamine-6-phosphate deaminase	10	17	45	28	0.0409894	0.375824	-1.41187	0.181818	0.377778	-0.19596	0.440452	Not significant	Not significant
phoP	Alkaline phosphatase synthesis transcriptional regulatory protein PhoP;DNA-binding response regulator	10	17	45	28	0.0409894	0.375824	-1.41187	0.181818	0.377778	-0.19596	0.440452	Not significant	Not significant
prmC	peptide chain release factor N(5)-glutamine methyltransferase	10	17	45	28	0.0409894	0.375824	-1.41187	0.181818	0.377778	-0.19596	0.440452	Not significant	Not significant
yidC	Membrane protein insertase YidC	10	17	45	28	0.0409894	0.375824	-1.41187	0.181818	0.377778	-0.19596	0.440452	Not significant	Not significant
comX1~~~comX	Transcriptional regulator;Competence-specific global transcription modulator;Transcriptional regulator ComX1;Competence-specific sigma factor ComX	4	10	51	35	0.0431173	0.295423	-1.75915	0.0727273	0.222222	-0.149495	0.440452	Not significant	Not significant
group_1247	Transposase IS110-like N-terminal domain-containing protein;Transposase IS116/IS110/IS902 family protein;IS110 family transposase;Insertion sequence transposase;Transposase IS116/IS110/IS902 C-terminal domain-containing protein;Transposase;Transposase IS116/IS110/IS902 family;Mobile element protein	4	10	51	35	0.0431173	0.295423	-1.75915	0.0727273	0.222222	-0.149495	0.440452	Not significant	Not significant
group_15057	Alanine racemase	4	10	51	35	0.0431173	0.295423	-1.75915	0.0727273	0.222222	-0.149495	0.440452	Not significant	Not significant
group_3130	hypothetical protein;50S ribosomal protein L29	4	10	51	35	0.0431173	0.295423	-1.75915	0.0727273	0.222222	-0.149495	0.440452	Not significant	Not significant
group_3132	Sodium/hydrogen exchanger family protein;Cation/H+ exchanger domain-containing protein;Na+/H+ antiporter	4	10	51	35	0.0431173	0.295423	-1.75915	0.0727273	0.222222	-0.149495	0.440452	Not significant	Not significant
group_1145	Glycosyltransferase 2-like domain-containing protein;Putative glycosyltransferase EpsJ	1	6	54	39	0.0434973	0.167255	-2.57988	0.0181818	0.133333	-0.115152	0.440452	Not significant	Not significant
group_1194	SP_1767 family glycosyltransferase;Family 8 glycosyl transferase;Glycosyltransferase GT-D fold domain-containing protein	1	6	54	39	0.0434973	0.167255	-2.57988	0.0181818	0.133333	-0.115152	0.440452	Not significant	Not significant
group_12457	LXG domain-containing protein	1	6	54	39	0.0434973	0.167255	-2.57988	0.0181818	0.133333	-0.115152	0.440452	Not significant	Not significant
group_1292	GT-D fold domain-containing glycosyltransferase;Glucosyltransferase 3	1	6	54	39	0.0434973	0.167255	-2.57988	0.0181818	0.133333	-0.115152	0.440452	Not significant	Not significant
group_15006	Type I toxin-antitoxin system Fst family toxin	1	6	54	39	0.0434973	0.167255	-2.57988	0.0181818	0.133333	-0.115152	0.440452	Not significant	Not significant
group_15945	hypothetical protein	1	6	54	39	0.0434973	0.167255	-2.57988	0.0181818	0.133333	-0.115152	0.440452	Not significant	Not significant
group_16029	Type II restriction endonuclease DpnI;Type II Methyl-directed restriction enzyme DpnI	1	6	54	39	0.0434973	0.167255	-2.57988	0.0181818	0.133333	-0.115152	0.440452	Not significant	Not significant
group_16147	DUF997 domain-containing protein	1	6	54	39	0.0434973	0.167255	-2.57988	0.0181818	0.133333	-0.115152	0.440452	Not significant	Not significant
group_16280	LXG domain-containing protein;hypothetical protein	1	6	54	39	0.0434973	0.167255	-2.57988	0.0181818	0.133333	-0.115152	0.440452	Not significant	Not significant
group_16477	Lipoprotein	1	6	54	39	0.0434973	0.167255	-2.57988	0.0181818	0.133333	-0.115152	0.440452	Not significant	Not significant
group_16759	Transposase	1	6	54	39	0.0434973	0.167255	-2.57988	0.0181818	0.133333	-0.115152	0.440452	Not significant	Not significant
group_17856	Flagellar FliJ protein	1	6	54	39	0.0434973	0.167255	-2.57988	0.0181818	0.133333	-0.115152	0.440452	Not significant	Not significant
group_19224	Triacylglycerol lipase	1	6	54	39	0.0434973	0.167255	-2.57988	0.0181818	0.133333	-0.115152	0.440452	Not significant	Not significant
group_19729	Transposase;hypothetical protein	1	6	54	39	0.0434973	0.167255	-2.57988	0.0181818	0.133333	-0.115152	0.440452	Not significant	Not significant
group_19851	hypothetical protein	1	6	54	39	0.0434973	0.167255	-2.57988	0.0181818	0.133333	-0.115152	0.440452	Not significant	Not significant
group_21540	DUF1310 domain-containing protein	1	6	54	39	0.0434973	0.167255	-2.57988	0.0181818	0.133333	-0.115152	0.440452	Not significant	Not significant
group_243	hypothetical protein	1	6	54	39	0.0434973	0.167255	-2.57988	0.0181818	0.133333	-0.115152	0.440452	Not significant	Not significant
group_802	DUF1310 domain-containing protein	1	6	54	39	0.0434973	0.167255	-2.57988	0.0181818	0.133333	-0.115152	0.440452	Not significant	Not significant
group_864	Putative lipoprotein;Lipoprotein	1	6	54	39	0.0434973	0.167255	-2.57988	0.0181818	0.133333	-0.115152	0.440452	Not significant	Not significant
wbbJ	Acetyltransferase;Maltose O-acetyltransferase;Acetyltransferase isoleucine patch superfamily;hypothetical protein	36	20	19	25	0.0438819	2.32833	1.2193	0.654545	0.444444	0.210101	0.440452	Not significant	Enriched in Resistant
acuI~~~yhfP	Oxidoreductase;Enoyl reductase (ER) domain-containing protein;Zinc-containing alcohol dehydrogenase;Acrylyl-CoA reductase AcuI;Putative quinone oxidoreductase YhfP;Molecular chaperone GroES;Putative oxidoreductase;GroES-like domain protein;Enoylreductase	11	18	44	27	0.0452488	0.384148	-1.38027	0.2	0.4	-0.2	0.440452	Not significant	Not significant
group_21643	Glycyl-tRNA synthetase subunit alpha;Transposase;Rpn family recombination-promoting nuclease/putative transposase;Transposase (putative) YhgA-like domain-containing protein	16	5	39	40	0.0467205	3.07595	1.62103	0.290909	0.111111	0.179798	0.440452	Not significant	Not significant
group_2808	Phosphotransferase system cellobiose-specific component IIC;PTS cellobiose-specific IIC component;PTS sugar transporter subunit IIC;Cellobiose-specific PTS system IIC component;hypothetical protein;PTS system lactose/cellobiose family IIC component	16	5	39	40	0.0467205	3.07595	1.62103	0.290909	0.111111	0.179798	0.440452	Not significant	Not significant
group_2818	Uncharacterized conserved protein with an alpha/beta hydrolase fold;Alpha/beta hydrolase fold-5 domain-containing protein	16	5	39	40	0.0467205	3.07595	1.62103	0.290909	0.111111	0.179798	0.440452	Not significant	Not significant
dtd	D-aminoacyl-tRNA deacylase;D-Tyr-tRNA(Tyr) deacylase domain protein	39	40	16	5	0.0467205	0.325103	-1.62103	0.709091	0.888889	-0.179798	0.440452	Not significant	Not significant
group_2705	GTP diphosphokinase;ACT domain-containing protein;HD domain-containing protein;(p)ppGpp synthase/hydrolase HD superfamily	39	40	16	5	0.0467205	0.325103	-1.62103	0.709091	0.888889	-0.179798	0.440452	Not significant	Not significant
tqsA	ATP synthase F0 A subunit;Permease;AI-2E family transporter;hypothetical protein;AI-2 transport protein TqsA	23	28	32	17	0.0473325	0.443995	-1.17139	0.418182	0.622222	-0.20404	0.440452	Not significant	Enriched in Sensitive
group_1938	PTS system mannose/fructose/sorbose family IID component domain protein;PTS system mannose-specific EIID component;PTS family mannose/fructose/sorbose porter component IID;Phosphotransferase system mannose/fructose/N-acetylgalactosamine-specific IID component;PTS system mannose-specific IID component;Mannose permease IID component;PTS mannose family transporter subunit IID	43	42	12	3	0.0481744	0.286588	-1.80295	0.781818	0.933333	-0.151515	0.440452	Not significant	Not significant
group_2029	PTS system mannose-specific transporter subunit IIC;PTS mannose transporter subunit IIC;PTS family mannose porter IIC component;PTS mannose/fructose/sorbose transporter subunit IIC;Phosphotransferase system enzyme IImannose-specific IIC component;Mannose permease IIC component;Phosphotransferase system mannose/fructose/N-acetylgalactosamine-specific IIC component;PTS system sorbose-specific iic c…	43	42	12	3	0.0481744	0.286588	-1.80295	0.781818	0.933333	-0.151515	0.440452	Not significant	Not significant
group_2061	Phosphotransferase system mannose/fructose/N-acetylgalactosamine-specific component IIB;PTS sugar transporter subunit IIA;Phosphotransferase system mannose-specific EIIAB;PTS system mannose-specific EIIAB component	43	42	12	3	0.0481744	0.286588	-1.80295	0.781818	0.933333	-0.151515	0.440452	Not significant	Not significant
group_2875	Sugar ABC transporter ATP-binding protein;ABC transporter ATP-binding protein;Sugar ABC superfamily ATP binding cassette transporter ABC protein;Putative ABC transporter ATP-binding protein;Multidrug ABC transporter permease;ABC-type multidrug transport system ATPase and permease component;hypothetical protein;ABC transporter transmembrane region	43	42	12	3	0.0481744	0.286588	-1.80295	0.781818	0.933333	-0.151515	0.440452	Not significant	Not significant
group_21680	30S ribosomal protein S16;DUF4649 domain-containing protein	40	40	15	5	0.0492267	0.354839	-1.49476	0.727273	0.888889	-0.161616	0.440452	Not significant	Not significant
group_665	Malate permease;hypothetical protein;Membrane transport protein	15	5	40	40	0.0492267	2.81818	1.49476	0.272727	0.111111	0.161616	0.440452	Not significant	Not significant
yqfA	Hemolysin;Hemolysin III;putative membrane channel-forming protein YqfA hemolysin III family	33	36	22	9	0.0495989	0.387519	-1.36766	0.6	0.8	-0.2	0.440452	Not significant	Enriched in Sensitive
galM	Aldose 1-epimerase;Galactose mutarotase or related enzyme	32	35	23	10	0.0540218	0.40905	-1.28965	0.581818	0.777778	-0.19596	0.440452	Not significant	Not significant
group_2980	DNA-binding transcriptional activator PspC;Phage shock protein PspC N-terminal domain-containing protein;PspC domain-containing protein;Phage shock protein PspC (stress-responsive transcriptional regulator);PspC domain protein	32	35	23	10	0.0540218	0.40905	-1.28965	0.581818	0.777778	-0.19596	0.440452	Not significant	Not significant
group_1607	pullulanase;hypothetical protein	5	11	50	34	0.0540699	0.326733	-1.61382	0.0909091	0.244444	-0.153535	0.440452	Not significant	Not significant
group_2115	amidophosphoribosyltransferase	5	11	50	34	0.0540699	0.326733	-1.61382	0.0909091	0.244444	-0.153535	0.440452	Not significant	Not significant
ccpN	CBS domain protein;CBS domain-containing protein;Transcriptional repressor CcpN	13	19	42	26	0.0552216	0.431674	-1.21199	0.236364	0.422222	-0.185859	0.440452	Not significant	Not significant
group_2871	Putative pyruvate phosphate dikinase regulatory protein	13	19	42	26	0.0552216	0.431674	-1.21199	0.236364	0.422222	-0.185859	0.440452	Not significant	Not significant
group_2365	Phosphopentomutase;DUF1697 domain-containing protein	8	14	47	31	0.0553415	0.388748	-1.36309	0.145455	0.311111	-0.165657	0.440452	Not significant	Not significant
group_688	Lactose phosphotransferase system repressor;HTH deoR-type domain-containing protein	8	14	47	31	0.0553415	0.388748	-1.36309	0.145455	0.311111	-0.165657	0.440452	Not significant	Not significant
ycaM	Amino acid permease/ SLC12A domain-containing protein;Inner membrane transporter YcaM	8	14	47	31	0.0553415	0.388748	-1.36309	0.145455	0.311111	-0.165657	0.440452	Not significant	Not significant
group_2652	DUF6261 domain-containing protein;hypothetical protein;Conserved uncharacterized protein;Chemotaxis protein;LXG domain-containing protein	14	20	41	25	0.0574457	0.434617	-1.20219	0.254545	0.444444	-0.189899	0.440452	Not significant	Not significant
group_477	Transport permease protein;ABC-2 type transporter transmembrane domain-containing protein	14	20	41	25	0.0574457	0.434617	-1.20219	0.254545	0.444444	-0.189899	0.440452	Not significant	Not significant
group_1458	type II toxin-antitoxin system toxin PezT;hypothetical protein;zeta toxin family protein;UDP-N-acetylglucosamine kinase;Toxin PezT	15	21	40	24	0.0596833	0.436118	-1.19721	0.272727	0.466667	-0.193939	0.440452	Not significant	Not significant
cshA	CshA family fibrillar surface protein C;LPXTG cell wall anchor domain-containing protein;YSIRK type signal peptide;CshA/CshB family fibrillar adhesin-related protein;hypothetical protein;Surface protein G;Gram positive anchor;Gram-positive cocci surface proteins LPxTG domain-containing protein;Putative cross-wall-targeting lipoprotein signal;CshA domain-containing protein;Putative hemagglutinin/h…	10	2	45	43	0.0603113	4.01538	2.00554	0.181818	0.0444444	0.137374	0.440452	Not significant	Not significant
gltC	HTH lysR-type domain-containing protein;HTH-type transcriptional regulator GltC	10	2	45	43	0.0603113	4.01538	2.00554	0.181818	0.0444444	0.137374	0.440452	Not significant	Not significant
group_18141	hypothetical protein;Aquaporin	10	2	45	43	0.0603113	4.01538	2.00554	0.181818	0.0444444	0.137374	0.440452	Not significant	Not significant
group_3037	Positive transcriptional regulator MutR family;DNA-binding helix-turn-helix protein	10	2	45	43	0.0603113	4.01538	2.00554	0.181818	0.0444444	0.137374	0.440452	Not significant	Not significant
argE	Succinyl-diaminopimelate desuccinylase;Acetylornithine deacetylase/Succinyl-diaminopimelate desuccinylase or related deacylase;Acetylornithinedeacetylase/Succinyl-diaminopimelate desuccinylase andrelated deacylase;Acetylornithine deacetylase/succinyl-diaminopimelate desuccinylase (M20/M25/M40 family peptidase) putative;Acetylornithine deacetylase/succinyl-diaminopimelate desuccinylase;Peptidase M…	45	43	10	2	0.0603113	0.249042	-2.00554	0.818182	0.955556	-0.137374	0.440452	Not significant	Not significant
argS	arginine--tRNA ligase	45	43	10	2	0.0603113	0.249042	-2.00554	0.818182	0.955556	-0.137374	0.440452	Not significant	Not significant
asnS	asparagine--tRNA ligase	45	43	10	2	0.0603113	0.249042	-2.00554	0.818182	0.955556	-0.137374	0.440452	Not significant	Not significant
bceB~~~yxdM	ABC3 transporter permease protein domain-containing protein;ABC transporter permease protein;Peptide ABC transporter permease;Bacitracin export permease protein BceB;ABC transporter permease protein YxdM;Efflux ABC transporter permease protein	45	43	10	2	0.0603113	0.249042	-2.00554	0.818182	0.955556	-0.137374	0.440452	Not significant	Not significant
ccpA~~~lacI	catabolite control protein A;Bacterial regulatory protein LacI family	45	43	10	2	0.0603113	0.249042	-2.00554	0.818182	0.955556	-0.137374	0.440452	Not significant	Not significant
clpP	ATP-dependent Clp protease proteolytic subunit;ATP-dependent protease ClpP protease subunit;ATP-dependent Clp protease proteolytic subunit ClpP	45	43	10	2	0.0603113	0.249042	-2.00554	0.818182	0.955556	-0.137374	0.440452	Not significant	Not significant
coaA	type I pantothenate kinase;Pantothenate kinase;hypothetical protein	45	43	10	2	0.0603113	0.249042	-2.00554	0.818182	0.955556	-0.137374	0.440452	Not significant	Not significant
cof~~~ybjI	Cof-like hydrolase;HAD superfamily hydrolase;Hydroxymethylpyrimidine pyrophosphatase and other HAD family phosphatases;Cof family protein;Hydrolase (HAD superfamily);Flavin mononucleotide phosphatase YbjI;hypothetical protein	45	43	10	2	0.0603113	0.249042	-2.00554	0.818182	0.955556	-0.137374	0.440452	Not significant	Not significant
dgkA	Diacylglycerol kinase;Undecaprenol kinase;Prokaryotic diacylglycerol kinase	45	43	10	2	0.0603113	0.249042	-2.00554	0.818182	0.955556	-0.137374	0.440452	Not significant	Not significant
dinB	DNA polymerase IV	45	43	10	2	0.0603113	0.249042	-2.00554	0.818182	0.955556	-0.137374	0.440452	Not significant	Not significant
dusB	tRNA dihydrouridine synthase DusB;tRNA-dihydrouridine synthase;hypothetical protein;DUS-like FMN-binding domain-containing protein;tRNA-dihydrouridine synthase B;Dihydrouridine synthase	45	43	10	2	0.0603113	0.249042	-2.00554	0.818182	0.955556	-0.137374	0.440452	Not significant	Not significant
era	GTPase Era	45	43	10	2	0.0603113	0.249042	-2.00554	0.818182	0.955556	-0.137374	0.440452	Not significant	Not significant
ezrA	septation ring formation regulator EzrA;Septation ring formation regulator EzrA;hypothetical protein;Septation ring formation regulator EzrA-like protein	45	43	10	2	0.0603113	0.249042	-2.00554	0.818182	0.955556	-0.137374	0.440452	Not significant	Not significant
fabH	Beta-ketoacyl-[acyl-carrier-protein] synthase III;beta-ketoacyl-ACP synthase 3;hypothetical protein	45	43	10	2	0.0603113	0.249042	-2.00554	0.818182	0.955556	-0.137374	0.440452	Not significant	Not significant
ffh	signal recognition particle protein;Signal recognition particle protein;hypothetical protein;Signal recognition particle subunit Ffh SRP54;signal recognition particle receptor subunit alpha	45	43	10	2	0.0603113	0.249042	-2.00554	0.818182	0.955556	-0.137374	0.440452	Not significant	Not significant
fldA	flavodoxin;flavodoxin domain-containing protein;hypothetical protein	45	43	10	2	0.0603113	0.249042	-2.00554	0.818182	0.955556	-0.137374	0.440452	Not significant	Not significant
ftsY	Signal recognition particle receptor FtsY;signal recognition particle-docking protein FtsY;hypothetical protein;Signal recognition particle-docking protein FtsY;Signal recognition particle receptor protein FtsY alpha subunit;signal recognition particle receptor subunit alpha	45	43	10	2	0.0603113	0.249042	-2.00554	0.818182	0.955556	-0.137374	0.440452	Not significant	Not significant
gdhA	NADP-specific glutamate dehydrogenase	45	43	10	2	0.0603113	0.249042	-2.00554	0.818182	0.955556	-0.137374	0.440452	Not significant	Not significant
gdpP	Cyclic-di-AMP phosphodiesterase;Phosphoesterase DHH family protein;DHHA1 domain-containing protein;Cyclic di-AMP phosphodiesterase GdpP contains GGDEF-like and DHH domains;hypothetical protein	45	43	10	2	0.0603113	0.249042	-2.00554	0.818182	0.955556	-0.137374	0.440452	Not significant	Not significant
glyA	Serine hydroxymethyltransferase;Glycine/serine hydroxymethyltransferase;hypothetical protein	45	43	10	2	0.0603113	0.249042	-2.00554	0.818182	0.955556	-0.137374	0.440452	Not significant	Not significant
gntR~~~yvoA~~~mngR	HTH gntR-type domain-containing protein;GntR family transcriptional regulator;HTH-type transcriptional repressor YvoA;DNA-binding transcriptional regulator GntR family	45	43	10	2	0.0603113	0.249042	-2.00554	0.818182	0.955556	-0.137374	0.440452	Not significant	Not significant
group_1731	formate C-acetyltransferase;Pyruvate formate lyase;Pyruvate formate-lyase;pyruvate formate lyase family protein	45	43	10	2	0.0603113	0.249042	-2.00554	0.818182	0.955556	-0.137374	0.440452	Not significant	Not significant
group_18735	peptide chain release factor 2	45	43	10	2	0.0603113	0.249042	-2.00554	0.818182	0.955556	-0.137374	0.440452	Not significant	Not significant
group_1902	Phosphoglycerate mutase family protein;Phosphoglycerate mutase;23-bisphosphoglycerate-dependent phosphoglycerate mutase;Phosphoglycerate mutase family;Fructose-26bisphosphatase;Putative phosphoglycerate mutase	45	43	10	2	0.0603113	0.249042	-2.00554	0.818182	0.955556	-0.137374	0.440452	Not significant	Not significant
group_19698	30S ribosomal protein S21	45	43	10	2	0.0603113	0.249042	-2.00554	0.818182	0.955556	-0.137374	0.440452	Not significant	Not significant
group_19754	cell division ATP-binding protein FtsE	45	43	10	2	0.0603113	0.249042	-2.00554	0.818182	0.955556	-0.137374	0.440452	Not significant	Not significant
group_1983	DNA-binding transcriptional regulator LysR family;Transcriptional regulator	45	43	10	2	0.0603113	0.249042	-2.00554	0.818182	0.955556	-0.137374	0.440452	Not significant	Not significant
group_20360	permease-like cell division protein FtsX;FtsX-like permease family protein;Cell division ABC transporter permease protein FtsX	45	43	10	2	0.0603113	0.249042	-2.00554	0.818182	0.955556	-0.137374	0.440452	Not significant	Not significant
group_2253	P-type cation-transporting ATPase;Magnesium-transporting ATPase (P-type);HAD-IC family P-type ATPase;E1-E2 ATPase;hypothetical protein;Cation-transporting P-type ATPase N-terminal domain-containing protein	45	43	10	2	0.0603113	0.249042	-2.00554	0.818182	0.955556	-0.137374	0.440452	Not significant	Not significant
group_2298	DUF3013 domain-containing protein	45	43	10	2	0.0603113	0.249042	-2.00554	0.818182	0.955556	-0.137374	0.440452	Not significant	Not significant
group_2308	DNA-directed RNA polymerase subunit delta	45	43	10	2	0.0603113	0.249042	-2.00554	0.818182	0.955556	-0.137374	0.440452	Not significant	Not significant
group_2372	DNA mismatch repair protein MutS;hypothetical protein;DNA mismatch repair protein mutS;DNA mismatch repair proteins mutS family domain-containing protein	45	43	10	2	0.0603113	0.249042	-2.00554	0.818182	0.955556	-0.137374	0.440452	Not significant	Not significant
group_2430	Cysteine desulfurase;Aminotransferase class V domain-containing protein	45	43	10	2	0.0603113	0.249042	-2.00554	0.818182	0.955556	-0.137374	0.440452	Not significant	Not significant
group_2475	L-threonylcarbamoyladenylate synthase;YrdC-like domain-containing protein;Sua5/YciO/YrdC/YwlC family protein;TsaC protein (YrdC domain)	45	43	10	2	0.0603113	0.249042	-2.00554	0.818182	0.955556	-0.137374	0.440452	Not significant	Not significant
group_2497	preprotein translocase subunit SecG;Protein-export membrane protein SecG	45	43	10	2	0.0603113	0.249042	-2.00554	0.818182	0.955556	-0.137374	0.440452	Not significant	Not significant
group_2549	Pseudouridine synthase;Pseudouridine synthase RluA 23S rRNA- or tRNA-specific;pseudouridine synthase	45	43	10	2	0.0603113	0.249042	-2.00554	0.818182	0.955556	-0.137374	0.440452	Not significant	Not significant
group_2564	ribonuclease R;hypothetical protein;Ribonuclease R;RNB domain-containing ribonuclease	45	43	10	2	0.0603113	0.249042	-2.00554	0.818182	0.955556	-0.137374	0.440452	Not significant	Not significant
group_2625	Branched-chain amino acid aminotransferase;DUF2969 domain-containing protein	45	43	10	2	0.0603113	0.249042	-2.00554	0.818182	0.955556	-0.137374	0.440452	Not significant	Not significant
group_2637	DNA topoisomerase IV subunit A;DNA topoisomerase (ATP-hydrolyzing);hypothetical protein	45	43	10	2	0.0603113	0.249042	-2.00554	0.818182	0.955556	-0.137374	0.440452	Not significant	Not significant
group_2638	DNA topoisomerase IV subunit B;DNA topoisomerase 4 subunit B;DNA topoisomerase (ATP-hydrolyzing)	45	43	10	2	0.0603113	0.249042	-2.00554	0.818182	0.955556	-0.137374	0.440452	Not significant	Not significant
group_2674	Permease;AI-2E family transporter;ATP synthase F0 A subunit;Membrane protein	45	43	10	2	0.0603113	0.249042	-2.00554	0.818182	0.955556	-0.137374	0.440452	Not significant	Not significant
group_2811	peptide deformylase;Peptide deformylase;hypothetical protein	45	43	10	2	0.0603113	0.249042	-2.00554	0.818182	0.955556	-0.137374	0.440452	Not significant	Not significant
group_2813	N-acetylmuramoyl-L-alanine amidase;Glycosyl hydrolase family 25;Lyzozyme M1 (14-beta-N-acetylmuramidase) GH25 family;GH25 family lysozyme;Lyzozyme M1 (14-beta-N-acetylmuramidase);14-beta-N-acetylmuramidase;Glycoside hydrolase;hypothetical protein	45	43	10	2	0.0603113	0.249042	-2.00554	0.818182	0.955556	-0.137374	0.440452	Not significant	Not significant
group_2822	Pseudouridine synthase;hypothetical protein;16S rRNA pseudouridine(516) synthase;Pseudouridylate synthase RsuA specific for 16S rRNA U516 and 23S rRNA U2605;pseudouridine synthase	45	43	10	2	0.0603113	0.249042	-2.00554	0.818182	0.955556	-0.137374	0.440452	Not significant	Not significant
group_2851	Pseudouridine synthase;Pseudouridine synthase RluA 23S rRNA- or tRNA-specific	45	43	10	2	0.0603113	0.249042	-2.00554	0.818182	0.955556	-0.137374	0.440452	Not significant	Not significant
group_2853	DNA-binding transcriptional regulator LysR family;hypothetical protein;LysR family transcriptional regulator;HTH lysR-type domain-containing protein;Transcriptional regulator LysR family protein	45	43	10	2	0.0603113	0.249042	-2.00554	0.818182	0.955556	-0.137374	0.440452	Not significant	Not significant
group_2855	anaerobic ribonucleoside-triphosphate reductase;Anaerobic ribonucleoside-triphosphate reductase;Ribonucleotide reductase of class III (Anaerobic) large subunit;Ribonucleoside-triphosphate reductase	45	43	10	2	0.0603113	0.249042	-2.00554	0.818182	0.955556	-0.137374	0.440452	Not significant	Not significant
group_2880	Cysteine desulfurase;Cysteine desulfurase / selenocysteine lyase;Cysteine desulfurase/Cysteine sulfinate desulfinase IscS or related enzyme NifS family;Aminotransferase class V domain-containing protein;cysteine desulfurase family protein	45	43	10	2	0.0603113	0.249042	-2.00554	0.818182	0.955556	-0.137374	0.440452	Not significant	Not significant
group_2882	ribosome maturation factor RimM;hypothetical protein;RimM protein required for 16S rRNA processing	45	43	10	2	0.0603113	0.249042	-2.00554	0.818182	0.955556	-0.137374	0.440452	Not significant	Not significant
group_2888	ABC transporter ATP-binding protein;ABC-type polar amino acid transport system ATPase component;Amino acid ABC transporter ATP-binding protein;amino acid ABC transporter ATP-binding protein	45	43	10	2	0.0603113	0.249042	-2.00554	0.818182	0.955556	-0.137374	0.440452	Not significant	Not significant
group_2912	ABC transporter permease protein;ABC transporter substrate-binding protein family 3;hypothetical protein;ABC transmembrane type-1 domain-containing protein;ABC transporter substrate-binding protein/permease;Arginine/histidine ABC transporter permease;Amino acid ABC transporter substrate-binding protein;transporter substrate-binding domain-containing protein;Transporter substrate-binding domain-co…	45	43	10	2	0.0603113	0.249042	-2.00554	0.818182	0.955556	-0.137374	0.440452	Not significant	Not significant
group_2943	DNA polymerase III subunit alpha;DNA-directed DNA polymerase;hypothetical protein;OB-fold nucleic acid binding domain-containing protein;DNA polymerase III alpha subunit;Polymerase/histidinol phosphatase N-terminal domain-containing protein	45	43	10	2	0.0603113	0.249042	-2.00554	0.818182	0.955556	-0.137374	0.440452	Not significant	Not significant
group_2952	DNA helicase PcrA;3'-5' exonuclease;DNA 3'-5' helicase	45	43	10	2	0.0603113	0.249042	-2.00554	0.818182	0.955556	-0.137374	0.440452	Not significant	Not significant
group_2967	excinuclease ABC subunit UvrB;UvrABC system protein B;hypothetical protein;DEAD/DEAH box helicase family protein	45	43	10	2	0.0603113	0.249042	-2.00554	0.818182	0.955556	-0.137374	0.440452	Not significant	Not significant
group_2977	S1 motif domain-containing protein;30S ribosomal protein S1;Transcription accessory protein (S1RNA-binding domain);Transcription accessory protein (S1 RNA-binding domain);Transcriptional accessory protein Tex/SPT6;Tex-like N-terminal domain-containing protein;S1 RNA-binding domain-containing protein	45	43	10	2	0.0603113	0.249042	-2.00554	0.818182	0.955556	-0.137374	0.440452	Not significant	Not significant
group_3003	DUF3042 domain-containing protein;PF11240 family protein;Signal peptide protein YSIRK family;Gram-positive signal peptide protein YSIRK family	45	43	10	2	0.0603113	0.249042	-2.00554	0.818182	0.955556	-0.137374	0.440452	Not significant	Not significant
group_3043	Aminotransferase;Aspartate aminotransferase;Aspartate/methionine/tyrosine aminotransferase;Aminotransferase class I/classII domain-containing protein;pyridoxal phosphate-dependent aminotransferase	45	43	10	2	0.0603113	0.249042	-2.00554	0.818182	0.955556	-0.137374	0.440452	Not significant	Not significant
group_3068	16S rRNA (guanine(527)-N(7))-methyltransferase RsmG	45	43	10	2	0.0603113	0.249042	-2.00554	0.818182	0.955556	-0.137374	0.440452	Not significant	Not significant
group_479	Aldose 1-epimerase	45	43	10	2	0.0603113	0.249042	-2.00554	0.818182	0.955556	-0.137374	0.440452	Not significant	Not significant
group_684	Hemerythrin HHE cation binding domain subfamily;DUF438 domain-containing protein;Hemerythrin HHE cation-binding protein;Hemerythrin HHE cation binding domain protein;Hemerythrin-like domain-containing protein;Uncharacterized conserved protein AF0170 contains SAB hemerythrin HHE and PAS domains	45	43	10	2	0.0603113	0.249042	-2.00554	0.818182	0.955556	-0.137374	0.440452	Not significant	Not significant
gyrB	DNA topoisomerase (ATP-hydrolyzing) subunit B;DNA topoisomerase (ATP-hydrolyzing)	45	43	10	2	0.0603113	0.249042	-2.00554	0.818182	0.955556	-0.137374	0.440452	Not significant	Not significant
hslO	Hsp33 family molecular chaperone HslO	45	43	10	2	0.0603113	0.249042	-2.00554	0.818182	0.955556	-0.137374	0.440452	Not significant	Not significant
ilvE	branched-chain amino acid aminotransferase;Branched-chain amino acid aminotransferase;Branched-chain-amino-acid aminotransferase	45	43	10	2	0.0603113	0.249042	-2.00554	0.818182	0.955556	-0.137374	0.440452	Not significant	Not significant
ireB	IreB family regulatory phosphoprotein	45	43	10	2	0.0603113	0.249042	-2.00554	0.818182	0.955556	-0.137374	0.440452	Not significant	Not significant
lepA	Elongation factor 4;translation elongation factor 4;Putative elongation factor 4;GTP-binding protein LepA C-terminus;GTP-binding protein LepA	45	43	10	2	0.0603113	0.249042	-2.00554	0.818182	0.955556	-0.137374	0.440452	Not significant	Not significant
livF	High-affinity branched-chain amino acid transport ATP-binding protein LivF;hypothetical protein;ABC transporter ATP-binding protein / Branched-chain amino acid transport ATP-binding protein LivF;ABC-type branched-chain amino acid transport system ATPase component LivF	45	43	10	2	0.0603113	0.249042	-2.00554	0.818182	0.955556	-0.137374	0.440452	Not significant	Not significant
livH	Branched-chain amino acid ABC transporter permease protein;Branched-chain amino acid ABC-type transport system permease component;hypothetical protein;Branched chain amino acid ABC transporter permease;Branched-chain amino acid ABC transporter permease	45	43	10	2	0.0603113	0.249042	-2.00554	0.818182	0.955556	-0.137374	0.440452	Not significant	Not significant
livK	Leucine-binding protein domain-containing protein;hypothetical protein;Branched chain amino acid ABC transporter substrate+B481-binding protein;ABC transporter substrate-binding protein-branched chain amino acid transport putative;ABC-type branched-chain amino acid transport system periplasmic component;Conserved domain protein;Receptor family ligand-binding region	45	43	10	2	0.0603113	0.249042	-2.00554	0.818182	0.955556	-0.137374	0.440452	Not significant	Not significant
livM	Branched-chain amino acid ABC transporter permease protein;Putative ABC transporter membrane-spanning permease;ABC transporter membrane-spanning permease-branched chain amino acid transport putative;Branched-chain amino acid ABC transporter permease;ABC-type branched-chain amino acid transport system permease component	45	43	10	2	0.0603113	0.249042	-2.00554	0.818182	0.955556	-0.137374	0.440452	Not significant	Not significant
lspA	signal peptidase II;Lipoprotein signal peptidase	45	43	10	2	0.0603113	0.249042	-2.00554	0.818182	0.955556	-0.137374	0.440452	Not significant	Not significant
malK	ABC-type sugar transport system ATPase component MalK;Sugar ABC superfamily ATP binding cassette transporter ABC protein;Multiple sugar ABC transporter ATP-binding protein;ATP-binding cassette domain-containing protein	45	43	10	2	0.0603113	0.249042	-2.00554	0.818182	0.955556	-0.137374	0.440452	Not significant	Not significant
metG	methionine--tRNA ligase	45	43	10	2	0.0603113	0.249042	-2.00554	0.818182	0.955556	-0.137374	0.440452	Not significant	Not significant
mltE~~~pmp23	CwlT-like lysozyme domain-containing protein;Pneumococcal vaccine antigen A;Lysozyme family protein;Lysozyme-like protein;Soluble lytic murein transglycosylase or regulatory protein s ( may contain LysM/invasin domain);lysozyme family protein;cell wall hydrolase Pmp23	45	43	10	2	0.0603113	0.249042	-2.00554	0.818182	0.955556	-0.137374	0.440452	Not significant	Not significant
mnmE	tRNA uridine-5-carboxymethylaminomethyl(34) synthesis GTPase MnmE	45	43	10	2	0.0603113	0.249042	-2.00554	0.818182	0.955556	-0.137374	0.440452	Not significant	Not significant
mraY	phospho-N-acetylmuramoyl-pentapeptide-transferase	45	43	10	2	0.0603113	0.249042	-2.00554	0.818182	0.955556	-0.137374	0.440452	Not significant	Not significant
msrB~~~msrAB1~~~msrA~~~msrAB	Multifunctional fusion protein;Peptide methionine sulfoxide reductase MsrA/MsrB 1;Peptide methionine sulfoxide reductase MsrA;Peptide methionine sulfoxide reductase MsrA/MsrB	45	43	10	2	0.0603113	0.249042	-2.00554	0.818182	0.955556	-0.137374	0.440452	Not significant	Not significant
mutM	DNA-formamidopyrimidine glycosylase;Formamidopyrimidine-DNA glycosylase	45	43	10	2	0.0603113	0.249042	-2.00554	0.818182	0.955556	-0.137374	0.440452	Not significant	Not significant
mutS2	Endonuclease MutS2;Smr domain protein;Recombination inhibitory protein MutS2;Smr domain-containing protein;endonuclease MutS2	45	43	10	2	0.0603113	0.249042	-2.00554	0.818182	0.955556	-0.137374	0.440452	Not significant	Not significant
nadK	NAD kinase	45	43	10	2	0.0603113	0.249042	-2.00554	0.818182	0.955556	-0.137374	0.440452	Not significant	Not significant
nagC	Sugar kinase of the NBD/HSP70 family may contain an N-terminal HTH domain;Glucokinase	45	43	10	2	0.0603113	0.249042	-2.00554	0.818182	0.955556	-0.137374	0.440452	Not significant	Not significant
ndpA	37-kD nucleoid-associated bacterial protein;Pseudouridylate synthases 23S RNA-specific;Nucleoid-associated bacterial family protein;dsDNA-binding nucleoid-associated protein YejK/NdpA	45	43	10	2	0.0603113	0.249042	-2.00554	0.818182	0.955556	-0.137374	0.440452	Not significant	Not significant
nrnA	Putative bifunctional oligoribonuclease and PAP phosphatase NrnA;3'-to-5' oligoribonuclease A;Bifunctional oligoribonuclease and PAP phosphatase NrnA;DHH subfamily 1 protein;DHH family phosphoesterase;Bifunctional oligoribonuclease/PAP phosphatase NrnA;nanoRNase/pAp phosphatase hydrolyzes c-di-AMP and oligoRNAs;DHHA1 domain-containing protein;50S ribosomal protein L31 type B	45	43	10	2	0.0603113	0.249042	-2.00554	0.818182	0.955556	-0.137374	0.440452	Not significant	Not significant
pepP	Proline dipeptidase putative;Putative proline dipeptidase;M24 family metallopeptidase;Dipeptidase;Creatinase;Xaa-Pro aminopeptidase	45	43	10	2	0.0603113	0.249042	-2.00554	0.818182	0.955556	-0.137374	0.440452	Not significant	Not significant
perM	ATP synthase F0 A subunit;hypothetical protein;AI-2E family transporter;putative PurR-regulated permease PerM	45	43	10	2	0.0603113	0.249042	-2.00554	0.818182	0.955556	-0.137374	0.440452	Not significant	Not significant
pfkA	6-phosphofructokinase;Phosphofructokinase	45	43	10	2	0.0603113	0.249042	-2.00554	0.818182	0.955556	-0.137374	0.440452	Not significant	Not significant
prfA	peptide chain release factor 1	45	43	10	2	0.0603113	0.249042	-2.00554	0.818182	0.955556	-0.137374	0.440452	Not significant	Not significant
prs~~~prs2	ribose-phosphate diphosphokinase	45	43	10	2	0.0603113	0.249042	-2.00554	0.818182	0.955556	-0.137374	0.440452	Not significant	Not significant
pta	phosphate acetyltransferase	45	43	10	2	0.0603113	0.249042	-2.00554	0.818182	0.955556	-0.137374	0.440452	Not significant	Not significant
pyk	pyruvate kinase	45	43	10	2	0.0603113	0.249042	-2.00554	0.818182	0.955556	-0.137374	0.440452	Not significant	Not significant
pyrB	aspartate carbamoyltransferase catalytic subunit;Aspartate carbamoyltransferase	45	43	10	2	0.0603113	0.249042	-2.00554	0.818182	0.955556	-0.137374	0.440452	Not significant	Not significant
pyrD~~~pyrDB	dihydroorotate dehydrogenase;Dihydroorotate dehydrogenase catalytic subunit	45	43	10	2	0.0603113	0.249042	-2.00554	0.818182	0.955556	-0.137374	0.440452	Not significant	Not significant
pyrE	Orotate phosphoribosyltransferase	45	43	10	2	0.0603113	0.249042	-2.00554	0.818182	0.955556	-0.137374	0.440452	Not significant	Not significant
pyrF	orotidine-5'-phosphate decarboxylase	45	43	10	2	0.0603113	0.249042	-2.00554	0.818182	0.955556	-0.137374	0.440452	Not significant	Not significant
pyrR	bifunctional pyr operon transcriptional regulator/uracil phosphoribosyltransferase PyrR;PyrR bifunctional protein;Uracil phosphoribosyltransferase / Pyrimidine operon regulatory protein PyrR	45	43	10	2	0.0603113	0.249042	-2.00554	0.818182	0.955556	-0.137374	0.440452	Not significant	Not significant
recD~~~yrrC	ATPase/5‚Äö√Ñ√¥-3‚Äö√Ñ√¥ helicase helicase subunit RecD of the DNA repair enzyme RecBCD (exonuclease V);ATP-dependent RecD-like DNA helicase;RecD-like DNA helicase YrrC;Exodeoxyribonuclease V alpha subunit;Helicase RecD/TraA family;hypothetical protein	45	43	10	2	0.0603113	0.249042	-2.00554	0.818182	0.955556	-0.137374	0.440452	Not significant	Not significant
rnhB	ribonuclease HII;Ribonuclease HII;Ribonuclease	45	43	10	2	0.0603113	0.249042	-2.00554	0.818182	0.955556	-0.137374	0.440452	Not significant	Not significant
rnhC	ribonuclease HIII;DUF3378 domain-containing protein;Ribonuclease;Ribonuclease HIII	45	43	10	2	0.0603113	0.249042	-2.00554	0.818182	0.955556	-0.137374	0.440452	Not significant	Not significant
rodA~~~ftsW	Rod shape-determining protein RodA;Peptodoglycan polymerase FtsW/RodA/SpoVE;Cell cycle protein FtsW/RodA/SpoVE domain protein;FtsW/RodA/SpoVE family cell cycle protein;Cell division protein FtsW;Cell cycle protein FtsW/RodA/SpoVE family;FtsW/RodA/SpoVE family cell division protein	45	43	10	2	0.0603113	0.249042	-2.00554	0.818182	0.955556	-0.137374	0.440452	Not significant	Not significant
rplS	50S ribosomal protein L19	45	43	10	2	0.0603113	0.249042	-2.00554	0.818182	0.955556	-0.137374	0.440452	Not significant	Not significant
rplU	50S ribosomal protein L21	45	43	10	2	0.0603113	0.249042	-2.00554	0.818182	0.955556	-0.137374	0.440452	Not significant	Not significant
rpmA	50S ribosomal protein L27;Large ribosomal subunit protein bL27;hypothetical protein	45	43	10	2	0.0603113	0.249042	-2.00554	0.818182	0.955556	-0.137374	0.440452	Not significant	Not significant
rpmE~~~rpmE2	type B 50S ribosomal protein L31	45	43	10	2	0.0603113	0.249042	-2.00554	0.818182	0.955556	-0.137374	0.440452	Not significant	Not significant
rpsA	30S ribosomal protein S1;S1 RNA-binding domain-containing protein	45	43	10	2	0.0603113	0.249042	-2.00554	0.818182	0.955556	-0.137374	0.440452	Not significant	Not significant
rqcH~~~fbp62~~~fbpA~~~pavA	Rqc2-like protein RqcH;Rqc2 family fibronectin-binding protein Fbp62;Rqc2 family fibronectin-binding protein FbpA;Fibronectin/fibrinogen-binding protein;Rqc2 family fibronectin-binding protein PavA;Fibronectin-binding protein-like protein A	45	43	10	2	0.0603113	0.249042	-2.00554	0.818182	0.955556	-0.137374	0.440452	Not significant	Not significant
rsmH~~~mraW	16S rRNA (cytosine(1402)-N(4))-methyltransferase RsmH;S-adenosyl-methyltransferase MraW;16S rRNA (cytosine(1402)-N(4))-methyltransferase	45	43	10	2	0.0603113	0.249042	-2.00554	0.818182	0.955556	-0.137374	0.440452	Not significant	Not significant
rsmI	16S rRNA (cytidine(1402)-2'-O)-methyltransferase;rRNA small subunit methyltransferase I;Ribosomal RNA small subunit methyltransferase I	45	43	10	2	0.0603113	0.249042	-2.00554	0.818182	0.955556	-0.137374	0.440452	Not significant	Not significant
ruvX	Holliday junction resolvase RuvX;Putative pre-16S rRNA nuclease	45	43	10	2	0.0603113	0.249042	-2.00554	0.818182	0.955556	-0.137374	0.440452	Not significant	Not significant
scaB~~~znuB	Manganese import system permease protein ScaB;ABC 3 transport family protein;metal ABC transporter permease;ABC-type Mn2+/Zn2+ transport system permease component	45	43	10	2	0.0603113	0.249042	-2.00554	0.818182	0.955556	-0.137374	0.440452	Not significant	Not significant
sdaAA	L-serine ammonia-lyase iron-sulfur-dependent subunit alpha;hypothetical protein;L-serine dehydratase alpha subunit	45	43	10	2	0.0603113	0.249042	-2.00554	0.818182	0.955556	-0.137374	0.440452	Not significant	Not significant
sdaAB	L-serine ammonia-lyase iron-sulfur-dependent subunit beta;hypothetical protein	45	43	10	2	0.0603113	0.249042	-2.00554	0.818182	0.955556	-0.137374	0.440452	Not significant	Not significant
serS	serine--tRNA ligase;hypothetical protein	45	43	10	2	0.0603113	0.249042	-2.00554	0.818182	0.955556	-0.137374	0.440452	Not significant	Not significant
sitB~~~fhuC~~~scaC~~~znuC	Iron ABC superfamily ATP binding cassette transporter ABC protein;Manganese ABC transporter ATP-binding protein SitB;Iron(3+)-hydroxamate import ATP-binding protein FhuC;Manganese import ATP-binding protein ScaC;ABC transporter domain-containing protein;ATP-binding cassette domain-containing protein;ABC transporter ATP-binding protein;High-affinity zinc uptake system ATP-binding protein ZnuC;ABC-…	45	43	10	2	0.0603113	0.249042	-2.00554	0.818182	0.955556	-0.137374	0.440452	Not significant	Not significant
smpB~~~tehB	SsrA-binding protein SmpB;SsrA-binding protein;SAM-dependent methyltransferase TehB	45	43	10	2	0.0603113	0.249042	-2.00554	0.818182	0.955556	-0.137374	0.440452	Not significant	Not significant
sprT	SprT family protein	45	43	10	2	0.0603113	0.249042	-2.00554	0.818182	0.955556	-0.137374	0.440452	Not significant	Not significant
ssaB~~~scaA~~~fimA~~~psaA	Manganese/Zinc ABC transporter substrate-binding lipoprotein putative;metal ABC transporter substrate-binding lipoprotein/adhesin SsaB;metal ABC transporter substrate-binding lipoprotein/adhesin ScbA;metal ABC transporter substrate-binding lipoprotein/adhesin ScaA;Metal ABC transporter substrate-binding protein;Metal ABC transporter substrate-binding lipoprotein FimA;hypothetical protein;metal AB…	45	43	10	2	0.0603113	0.249042	-2.00554	0.818182	0.955556	-0.137374	0.440452	Not significant	Not significant
tVP38	Uncharacterized membrane protein YdjX related to fungal oxalate transporter TVP38/TMEM64 family;TVP38/TMEM64 family membrane protein	45	43	10	2	0.0603113	0.249042	-2.00554	0.818182	0.955556	-0.137374	0.440452	Not significant	Not significant
tag	DNA-3-methyladenine glycosylase I;Methyladenine glycosylase;3-methyladenine DNA glycosylase Tag;DNA-3-methyladenine glycosylase 1;3-Methyladenine DNA glycosylase I constitutive putative;Putative DNA-3-methyladenine glycosylase I	45	43	10	2	0.0603113	0.249042	-2.00554	0.818182	0.955556	-0.137374	0.440452	Not significant	Not significant
tdk	thymidine kinase	45	43	10	2	0.0603113	0.249042	-2.00554	0.818182	0.955556	-0.137374	0.440452	Not significant	Not significant
thiI	putative tRNA sulfurtransferase;Thiamine biosynthesis ATP pyrophosphatase	45	43	10	2	0.0603113	0.249042	-2.00554	0.818182	0.955556	-0.137374	0.440452	Not significant	Not significant
thyA	thymidylate synthase	45	43	10	2	0.0603113	0.249042	-2.00554	0.818182	0.955556	-0.137374	0.440452	Not significant	Not significant
tig	Trigger factor;trigger factor;peptidylprolyl isomerase;trigger factor family protein;hypothetical protein	45	43	10	2	0.0603113	0.249042	-2.00554	0.818182	0.955556	-0.137374	0.440452	Not significant	Not significant
tmk	dTMP kinase	45	43	10	2	0.0603113	0.249042	-2.00554	0.818182	0.955556	-0.137374	0.440452	Not significant	Not significant
tmpC	ABC transporter substrate-binding protein PnrA-like domain-containing protein;Membrane lipoprotein TmpC;BMP family protein;BMP family ABC transporter substrate-binding protein;Lipoprotein;hypothetical protein	45	43	10	2	0.0603113	0.249042	-2.00554	0.818182	0.955556	-0.137374	0.440452	Not significant	Not significant
trmD	tRNA (guanosine(37)-N1)-methyltransferase TrmD	45	43	10	2	0.0603113	0.249042	-2.00554	0.818182	0.955556	-0.137374	0.440452	Not significant	Not significant
upp	uracil phosphoribosyltransferase;Uracil phosphoribosyltransferase	45	43	10	2	0.0603113	0.249042	-2.00554	0.818182	0.955556	-0.137374	0.440452	Not significant	Not significant
yabA	DNA replication initiation control protein YabA	45	43	10	2	0.0603113	0.249042	-2.00554	0.818182	0.955556	-0.137374	0.440452	Not significant	Not significant
yajL	DJ-1/PfpI family protein;DJ-1 family glyoxalase III;hypothetical protein;Intracellular protease 1 (Intracellular protease I)	45	43	10	2	0.0603113	0.249042	-2.00554	0.818182	0.955556	-0.137374	0.440452	Not significant	Not significant
ybeY	rRNA maturation RNase YbeY	45	43	10	2	0.0603113	0.249042	-2.00554	0.818182	0.955556	-0.137374	0.440452	Not significant	Not significant
yccU	putative CoA-binding protein;CoA-binding domain-containing protein	45	43	10	2	0.0603113	0.249042	-2.00554	0.818182	0.955556	-0.137374	0.440452	Not significant	Not significant
ycgQ	TIGR03943 family protein;Phosphate ABC transporter substrate-binding protein;hypothetical protein;DUF1980 domain-containing protein	45	43	10	2	0.0603113	0.249042	-2.00554	0.818182	0.955556	-0.137374	0.440452	Not significant	Not significant
yidA~~~cof	Cof family protein;HAD superfamily hydrolase;Sugar phosphatase YidA;Cof-like hydrolase;Putative hydrolase;Hydroxymethylpyrimidine pyrophosphatase and other HAD family phosphatases	45	43	10	2	0.0603113	0.249042	-2.00554	0.818182	0.955556	-0.137374	0.440452	Not significant	Not significant
yjdM~~~phnA	Protein YjdM;Uncharacterized Zn-ribbon-containing protein;Alkylphosphonate utilization operon protein PhnA	45	43	10	2	0.0603113	0.249042	-2.00554	0.818182	0.955556	-0.137374	0.440452	Not significant	Not significant
ylqF	ribosome biogenesis GTPase YlqF	45	43	10	2	0.0603113	0.249042	-2.00554	0.818182	0.955556	-0.137374	0.440452	Not significant	Not significant
ylxM	putative DNA-binding protein;UPF0122 protein SMU_1061;UPF0122 protein SRLFYP117_01020;UPF0122 protein SP_1288	45	43	10	2	0.0603113	0.249042	-2.00554	0.818182	0.955556	-0.137374	0.440452	Not significant	Not significant
yqeG	putative phosphohydrolase YqeG HAD superfamily;HAD superfamily hydrolase protein;HAD phosphatase family IIIA;HAD superfamily phosphatase	45	43	10	2	0.0603113	0.249042	-2.00554	0.818182	0.955556	-0.137374	0.440452	Not significant	Not significant
yraQ	Permease;Membrane protein;Putative permease;permease;Uncharacterized membrane protein YraQ UPF0718 family	45	43	10	2	0.0603113	0.249042	-2.00554	0.818182	0.955556	-0.137374	0.440452	Not significant	Not significant
yrzB	UPF0473 protein str1961;UPF0473 protein SPH_0311;UPF0473 protein GTNG_2486;UPF0473 protein SSA_2239	45	43	10	2	0.0603113	0.249042	-2.00554	0.818182	0.955556	-0.137374	0.440452	Not significant	Not significant
ysxB	Ribosomal protein;DUF464 domain-containing protein	45	43	10	2	0.0603113	0.249042	-2.00554	0.818182	0.955556	-0.137374	0.440452	Not significant	Not significant
zapA	Cell division protein ZapA;Serine--tRNA ligase	45	43	10	2	0.0603113	0.249042	-2.00554	0.818182	0.955556	-0.137374	0.440452	Not significant	Not significant
zwf	glucose-6-phosphate dehydrogenase;Glucose-6-phosphate 1-dehydrogenase	45	43	10	2	0.0603113	0.249042	-2.00554	0.818182	0.955556	-0.137374	0.440452	Not significant	Not significant
accC	Biotin carboxylase;ATP-grasp domain protein;ATP-grasp domain-containing protein	3	8	52	37	0.0606683	0.294118	-1.76553	0.0545455	0.177778	-0.123232	0.440452	Not significant	Not significant
group_1384	IS30 family transposase;Putative integrase protein	3	8	52	37	0.0606683	0.294118	-1.76553	0.0545455	0.177778	-0.123232	0.440452	Not significant	Not significant
group_16545	ABC transporter ATP-binding protein	3	8	52	37	0.0606683	0.294118	-1.76553	0.0545455	0.177778	-0.123232	0.440452	Not significant	Not significant
group_17365	Bacteriocin transporter	3	8	52	37	0.0606683	0.294118	-1.76553	0.0545455	0.177778	-0.123232	0.440452	Not significant	Not significant
group_18157	ABM domain-containing protein	3	8	52	37	0.0606683	0.294118	-1.76553	0.0545455	0.177778	-0.123232	0.440452	Not significant	Not significant
group_18396	ABC transporter membrane protein	3	8	52	37	0.0606683	0.294118	-1.76553	0.0545455	0.177778	-0.123232	0.440452	Not significant	Not significant
group_19045	hypothetical protein;EXLDI protein	3	8	52	37	0.0606683	0.294118	-1.76553	0.0545455	0.177778	-0.123232	0.440452	Not significant	Not significant
group_19048	Arsenate reductase or related protein glutaredoxin family	3	8	52	37	0.0606683	0.294118	-1.76553	0.0545455	0.177778	-0.123232	0.440452	Not significant	Not significant
group_20584	LytTr family transcriptional regulator	3	8	52	37	0.0606683	0.294118	-1.76553	0.0545455	0.177778	-0.123232	0.440452	Not significant	Not significant
phnO	GNAT family acetyltransferase;Putative acetyltransferase;Acetyltransferase GNAT family;GNAT family acetyltransferase PhnO	3	8	52	37	0.0606683	0.294118	-1.76553	0.0545455	0.177778	-0.123232	0.440452	Not significant	Not significant
group_233	Peptidylprolyl isomerase;hypothetical protein	9	15	46	30	0.0610242	0.402012	-1.31469	0.163636	0.333333	-0.169697	0.440452	Not significant	Not significant
group_3026	Dihydrofolate reductase	9	15	46	30	0.0610242	0.402012	-1.31469	0.163636	0.333333	-0.169697	0.440452	Not significant	Not significant
group_10208	Metal cation transporter ZIP domain protein	5	0	50	45	0.0624343	9.91089	3.30901	0.0909091	0	0.0909091	0.440452	Not significant	Not significant
group_11431	HTH arsR-type domain-containing protein	5	0	50	45	0.0624343	9.91089	3.30901	0.0909091	0	0.0909091	0.440452	Not significant	Not significant
group_11657	Metal cation transporter ZIP family	5	0	50	45	0.0624343	9.91089	3.30901	0.0909091	0	0.0909091	0.440452	Not significant	Not significant
group_13076	Acetyltransferase	5	0	50	45	0.0624343	9.91089	3.30901	0.0909091	0	0.0909091	0.440452	Not significant	Not significant
group_13607	Replicon stabilization protein	5	0	50	45	0.0624343	9.91089	3.30901	0.0909091	0	0.0909091	0.440452	Not significant	Not significant
group_1385	Cytochrome D ubiquinol oxidase subunit I	5	0	50	45	0.0624343	9.91089	3.30901	0.0909091	0	0.0909091	0.440452	Not significant	Not significant
group_14324	hypothetical protein	5	0	50	45	0.0624343	9.91089	3.30901	0.0909091	0	0.0909091	0.440452	Not significant	Not significant
group_1486	Glucosyl transferase	5	0	50	45	0.0624343	9.91089	3.30901	0.0909091	0	0.0909091	0.440452	Not significant	Not significant
group_1487	accessory Sec system protein Asp2	5	0	50	45	0.0624343	9.91089	3.30901	0.0909091	0	0.0909091	0.440452	Not significant	Not significant
group_154	hypothetical protein;CPBP family intramembrane metalloprotease;CAAX amino terminal protease family protein	5	0	50	45	0.0624343	9.91089	3.30901	0.0909091	0	0.0909091	0.440452	Not significant	Not significant
group_16024	DUF4160 domain-containing protein	5	0	50	45	0.0624343	9.91089	3.30901	0.0909091	0	0.0909091	0.440452	Not significant	Not significant
group_16204	General stress protein 14	5	0	50	45	0.0624343	9.91089	3.30901	0.0909091	0	0.0909091	0.440452	Not significant	Not significant
group_16298	Glucosyltransferase-SI	5	0	50	45	0.0624343	9.91089	3.30901	0.0909091	0	0.0909091	0.440452	Not significant	Not significant
group_16507	ComC/BlpC family leader-containing pheromone/bacteriocin	5	0	50	45	0.0624343	9.91089	3.30901	0.0909091	0	0.0909091	0.440452	Not significant	Not significant
group_16675	ASCH domain-containing protein	5	0	50	45	0.0624343	9.91089	3.30901	0.0909091	0	0.0909091	0.440452	Not significant	Not significant
group_17026	Lipoprotein	5	0	50	45	0.0624343	9.91089	3.30901	0.0909091	0	0.0909091	0.440452	Not significant	Not significant
group_17032	Glycosyl transferase family 11	5	0	50	45	0.0624343	9.91089	3.30901	0.0909091	0	0.0909091	0.440452	Not significant	Not significant
group_17073	Lipoprotein	5	0	50	45	0.0624343	9.91089	3.30901	0.0909091	0	0.0909091	0.440452	Not significant	Not significant
group_17125	hypothetical protein	5	0	50	45	0.0624343	9.91089	3.30901	0.0909091	0	0.0909091	0.440452	Not significant	Not significant
group_17179	Exopolyphosphatase	5	0	50	45	0.0624343	9.91089	3.30901	0.0909091	0	0.0909091	0.440452	Not significant	Not significant
group_17657	Integral membrane protein;Lipoprotein	5	0	50	45	0.0624343	9.91089	3.30901	0.0909091	0	0.0909091	0.440452	Not significant	Not significant
group_17842	Glycosyltransferase;Glycosyltransferase Gtf1	5	0	50	45	0.0624343	9.91089	3.30901	0.0909091	0	0.0909091	0.440452	Not significant	Not significant
group_17935	Toxin-antitoxin system toxin component RelE family	5	0	50	45	0.0624343	9.91089	3.30901	0.0909091	0	0.0909091	0.440452	Not significant	Not significant
group_18097	Transcriptional regulator TetR family	5	0	50	45	0.0624343	9.91089	3.30901	0.0909091	0	0.0909091	0.440452	Not significant	Not significant
group_18186	Tyr recombinase domain-containing protein	5	0	50	45	0.0624343	9.91089	3.30901	0.0909091	0	0.0909091	0.440452	Not significant	Not significant
group_18231	Nucleoside phosphorylase domain-containing protein;Purine nucleoside phosphorylase DeoD-type	5	0	50	45	0.0624343	9.91089	3.30901	0.0909091	0	0.0909091	0.440452	Not significant	Not significant
group_18300	Muramoyltetrapeptide carboxypeptidase LdcA (peptidoglycan recycling)	5	0	50	45	0.0624343	9.91089	3.30901	0.0909091	0	0.0909091	0.440452	Not significant	Not significant
group_18370	Lipoprotein	5	0	50	45	0.0624343	9.91089	3.30901	0.0909091	0	0.0909091	0.440452	Not significant	Not significant
group_1850	Glycosyltransferase 2-like domain-containing protein;Glycosyltransferase putative;Putative glycosyltransferase EpsH	5	0	50	45	0.0624343	9.91089	3.30901	0.0909091	0	0.0909091	0.440452	Not significant	Not significant
group_1853	accessory Sec system translocase SecA2	5	0	50	45	0.0624343	9.91089	3.30901	0.0909091	0	0.0909091	0.440452	Not significant	Not significant
group_18566	ABC transporter transmembrane domain-containing protein;Peptide-2 ABC exporter (Pep2E) family ATP binding/membrane-spanning protein;ATP-binding cassette domain-containing protein	5	0	50	45	0.0624343	9.91089	3.30901	0.0909091	0	0.0909091	0.440452	Not significant	Not significant
group_18706	Lipoprotein	5	0	50	45	0.0624343	9.91089	3.30901	0.0909091	0	0.0909091	0.440452	Not significant	Not significant
group_18712	dTDP-4-keto-6-deoxyglucose-35-epimerase	5	0	50	45	0.0624343	9.91089	3.30901	0.0909091	0	0.0909091	0.440452	Not significant	Not significant
group_18713	dTDP-glucose 46-dehydratase	5	0	50	45	0.0624343	9.91089	3.30901	0.0909091	0	0.0909091	0.440452	Not significant	Not significant
group_18802	HTH cro/C1-type domain-containing protein	5	0	50	45	0.0624343	9.91089	3.30901	0.0909091	0	0.0909091	0.440452	Not significant	Not significant
group_18817	Glycosyl hydrolase family 8;Glycosyltransferase-stabilizing protein Gtf2	5	0	50	45	0.0624343	9.91089	3.30901	0.0909091	0	0.0909091	0.440452	Not significant	Not significant
group_18850	D-alanyl-D-alanine carboxypeptidase	5	0	50	45	0.0624343	9.91089	3.30901	0.0909091	0	0.0909091	0.440452	Not significant	Not significant
group_19383	DUF3173 domain-containing protein	5	0	50	45	0.0624343	9.91089	3.30901	0.0909091	0	0.0909091	0.440452	Not significant	Not significant
group_19524	HTH tetR-type domain-containing protein	5	0	50	45	0.0624343	9.91089	3.30901	0.0909091	0	0.0909091	0.440452	Not significant	Not significant
group_19567	MBL fold metallo-hydrolase	5	0	50	45	0.0624343	9.91089	3.30901	0.0909091	0	0.0909091	0.440452	Not significant	Not significant
group_19572	hypothetical protein	5	0	50	45	0.0624343	9.91089	3.30901	0.0909091	0	0.0909091	0.440452	Not significant	Not significant
group_19599	Helix-turn-helix transcriptional regulator;Positive transcriptional regulator MutR family protein;helix-turn-helix transcriptional regulator	5	0	50	45	0.0624343	9.91089	3.30901	0.0909091	0	0.0909091	0.440452	Not significant	Not significant
group_19740	Glycosyltransferase EpsE	5	0	50	45	0.0624343	9.91089	3.30901	0.0909091	0	0.0909091	0.440452	Not significant	Not significant
group_19982	ABC transporter permease;hypothetical protein	5	0	50	45	0.0624343	9.91089	3.30901	0.0909091	0	0.0909091	0.440452	Not significant	Not significant
group_20014	Yip1 domain-containing protein	5	0	50	45	0.0624343	9.91089	3.30901	0.0909091	0	0.0909091	0.440452	Not significant	Not significant
group_20075	Transcriptional regulator;Helix-turn-helix transcriptional regulator;HTH cro/C1-type domain-containing protein	5	0	50	45	0.0624343	9.91089	3.30901	0.0909091	0	0.0909091	0.440452	Not significant	Not significant
group_20114	ABC transporter permease;FtsX-like permease family protein	5	0	50	45	0.0624343	9.91089	3.30901	0.0909091	0	0.0909091	0.440452	Not significant	Not significant
group_2021	Cadmium-exporting ATPase	5	0	50	45	0.0624343	9.91089	3.30901	0.0909091	0	0.0909091	0.440452	Not significant	Not significant
group_20291	hypothetical protein	5	0	50	45	0.0624343	9.91089	3.30901	0.0909091	0	0.0909091	0.440452	Not significant	Not significant
group_20351	glycosyltransferase;Group 1 glycosyl transferase	5	0	50	45	0.0624343	9.91089	3.30901	0.0909091	0	0.0909091	0.440452	Not significant	Not significant
group_20402	Multidrug resistance efflux transporter family protein	5	0	50	45	0.0624343	9.91089	3.30901	0.0909091	0	0.0909091	0.440452	Not significant	Not significant
group_20461	DUF443 domain-containing protein;RDD domain-containing protein	5	0	50	45	0.0624343	9.91089	3.30901	0.0909091	0	0.0909091	0.440452	Not significant	Not significant
group_20489	DUF6287 domain-containing protein	5	0	50	45	0.0624343	9.91089	3.30901	0.0909091	0	0.0909091	0.440452	Not significant	Not significant
group_20730	accessory Sec system glycosyltransferase GtfB;Glycosyltransferase-stabilizing protein Gtf2;Accessory Sec system glycosyltransferase GtfB	5	0	50	45	0.0624343	9.91089	3.30901	0.0909091	0	0.0909091	0.440452	Not significant	Not significant
group_21021	hypothetical protein;Cobalamin biosynthesis protein CobN	5	0	50	45	0.0624343	9.91089	3.30901	0.0909091	0	0.0909091	0.440452	Not significant	Not significant
group_21032	XRE family transcriptional regulator;HTH cro/C1-type domain-containing protein	5	0	50	45	0.0624343	9.91089	3.30901	0.0909091	0	0.0909091	0.440452	Not significant	Not significant
group_21184	Fluoroquinolones export ATP-binding protein	5	0	50	45	0.0624343	9.91089	3.30901	0.0909091	0	0.0909091	0.440452	Not significant	Not significant
group_21275	ABC-2 type transporter transmembrane domain-containing protein	5	0	50	45	0.0624343	9.91089	3.30901	0.0909091	0	0.0909091	0.440452	Not significant	Not significant
group_21327	Phage protein	5	0	50	45	0.0624343	9.91089	3.30901	0.0909091	0	0.0909091	0.440452	Not significant	Not significant
group_21385	DUF6287 domain-containing protein	5	0	50	45	0.0624343	9.91089	3.30901	0.0909091	0	0.0909091	0.440452	Not significant	Not significant
group_21426	DNA-binding helix-turn-helix protein;HTH cro/C1-type domain-containing protein	5	0	50	45	0.0624343	9.91089	3.30901	0.0909091	0	0.0909091	0.440452	Not significant	Not significant
group_21510	Glucosyl transferase	5	0	50	45	0.0624343	9.91089	3.30901	0.0909091	0	0.0909091	0.440452	Not significant	Not significant
group_21519	Glucosyltransferase 3	5	0	50	45	0.0624343	9.91089	3.30901	0.0909091	0	0.0909091	0.440452	Not significant	Not significant
group_21584	Glucuronide permease	5	0	50	45	0.0624343	9.91089	3.30901	0.0909091	0	0.0909091	0.440452	Not significant	Not significant
group_2328	Oxidoreductase aldo/keto reductase family;Glyoxal reductase;Oxidoreductase aldo/keto reductase family protein	5	0	50	45	0.0624343	9.91089	3.30901	0.0909091	0	0.0909091	0.440452	Not significant	Not significant
group_3558	Glucosyl transferase	5	0	50	45	0.0624343	9.91089	3.30901	0.0909091	0	0.0909091	0.440452	Not significant	Not significant
group_400	ATPase AAA-type core domain-containing protein	5	0	50	45	0.0624343	9.91089	3.30901	0.0909091	0	0.0909091	0.440452	Not significant	Not significant
group_54	hypothetical protein	5	0	50	45	0.0624343	9.91089	3.30901	0.0909091	0	0.0909091	0.440452	Not significant	Not significant
group_559	Accessory Sec system glycosyltransferase GtfB;Glycosyltransferase family 1 protein;Glycosyltransferase-stabilizing protein Gtf2	5	0	50	45	0.0624343	9.91089	3.30901	0.0909091	0	0.0909091	0.440452	Not significant	Not significant
group_560	Glycosyltransferase Gtf1;glycosyltransferase	5	0	50	45	0.0624343	9.91089	3.30901	0.0909091	0	0.0909091	0.440452	Not significant	Not significant
group_6196	Glycosyltransferase group 2 family protein	5	0	50	45	0.0624343	9.91089	3.30901	0.0909091	0	0.0909091	0.440452	Not significant	Not significant
irrE~~~immA	IrrE N-terminal-like domain-containing protein;Putative ImmA protease	5	0	50	45	0.0624343	9.91089	3.30901	0.0909091	0	0.0909091	0.440452	Not significant	Not significant
group_2987	General stress protein 14;Flavodoxin-like fold domain-containing protein;NAD(P)H-dependent oxidoreductase;NAD(P)H dehydrogenase quinone family;Flavodoxin-like protein;hypothetical protein	25	12	30	33	0.0630222	2.24066	1.16392	0.454545	0.266667	0.187879	0.440452	Not significant	Not significant
group_2532	N-acetyltransferase domain-containing protein;Acetyltransferase;Protein N-acetyltransferase RimJ/RimL family;Acetyltransferase family protein;Acetyltransferase GNAT family	42	41	13	4	0.0633158	0.341365	-1.55061	0.763636	0.911111	-0.147475	0.440452	Not significant	Not significant
lrgA	Murein hydrolase regulator LrgA;Murein hydrolase exporter;Antiholin-like protein LrgA;CidA/LrgA family protein;Effector of murein hydrolase LrgA family;Effector of murein hydrolase LrgA;LrgA family protein	42	41	13	4	0.0633158	0.341365	-1.55061	0.763636	0.911111	-0.147475	0.440452	Not significant	Not significant
pepF	oligoendopeptidase F;M3 family metallopeptidase;Oligopeptidase F	42	41	13	4	0.0633158	0.341365	-1.55061	0.763636	0.911111	-0.147475	0.440452	Not significant	Not significant
yeaQ	Transglycosylase;Transglycosylase associated protein;Uncharacterized membrane protein YeaQ/YmgE transglycosylase-associated protein family;GlsB/YeaQ/YmgE family stress response membrane protein	42	41	13	4	0.0633158	0.341365	-1.55061	0.763636	0.911111	-0.147475	0.440452	Not significant	Not significant
group_13935	DUF3173 domain-containing protein	13	4	42	41	0.0633158	2.92941	1.55061	0.236364	0.0888889	0.147475	0.440452	Not significant	Not significant
group_17737	DNA relaxase NicK;Replication initiation factor;YdcR protein;Replication initiation factor domain-containing protein;Replication initiation protein	13	4	42	41	0.0633158	2.92941	1.55061	0.236364	0.0888889	0.147475	0.440452	Not significant	Not significant
group_17960	hypothetical protein	13	4	42	41	0.0633158	2.92941	1.55061	0.236364	0.0888889	0.147475	0.440452	Not significant	Not significant
group_19152	DUF3967 domain-containing protein	13	4	42	41	0.0633158	2.92941	1.55061	0.236364	0.0888889	0.147475	0.440452	Not significant	Not significant
group_21237	Lantibiotic ABC transporter permease;hypothetical protein	13	4	42	41	0.0633158	2.92941	1.55061	0.236364	0.0888889	0.147475	0.440452	Not significant	Not significant
group_577	Glucuronide permease	13	4	42	41	0.0633158	2.92941	1.55061	0.236364	0.0888889	0.147475	0.440452	Not significant	Not significant
group_1909	Putative ABC transporter;Putative ABC transporter ATP-binding protein;ABC transporter ATP-binding membrane protein	6	12	49	33	0.0653811	0.351919	-1.50668	0.109091	0.266667	-0.157576	0.440452	Not significant	Not significant
group_19842	MarR family transcriptional regulator	10	16	45	29	0.0667756	0.412587	-1.27723	0.181818	0.355556	-0.173737	0.440452	Not significant	Not significant
group_2044	type 2 isopentenyl-diphosphate Delta-isomerase	10	16	45	29	0.0667756	0.412587	-1.27723	0.181818	0.355556	-0.173737	0.440452	Not significant	Not significant
group_2195	diphosphomevalonate decarboxylase	10	16	45	29	0.0667756	0.412587	-1.27723	0.181818	0.355556	-0.173737	0.440452	Not significant	Not significant
group_2237	YbaB/EbfC family nucleoid-associated protein	10	16	45	29	0.0667756	0.412587	-1.27723	0.181818	0.355556	-0.173737	0.440452	Not significant	Not significant
group_2238	Xaa-Pro dipeptidyl-peptidase;hypothetical protein	10	16	45	29	0.0667756	0.412587	-1.27723	0.181818	0.355556	-0.173737	0.440452	Not significant	Not significant
group_2260	mevalonate kinase	10	16	45	29	0.0667756	0.412587	-1.27723	0.181818	0.355556	-0.173737	0.440452	Not significant	Not significant
group_2321	Aquaporin (Major Intrinsic Protein Family);Glycerol facilitator-aquaporin;Glycerol uptake facilitator protein;Aquaporin	10	16	45	29	0.0667756	0.412587	-1.27723	0.181818	0.355556	-0.173737	0.440452	Not significant	Not significant
group_2361	Beta-lactamase class C;Beta-lactamase-like protein;Beta-lactamase-related domain-containing protein;Beta-lactamase	10	16	45	29	0.0667756	0.412587	-1.27723	0.181818	0.355556	-0.173737	0.440452	Not significant	Not significant
group_2468	Phosphoribosylanthranilate isomerase	10	16	45	29	0.0667756	0.412587	-1.27723	0.181818	0.355556	-0.173737	0.440452	Not significant	Not significant
group_2795	Putative phosphohydrolase;Nudix hydrolase domain-containing protein;8-oxo-dGTP diphosphatase	10	16	45	29	0.0667756	0.412587	-1.27723	0.181818	0.355556	-0.173737	0.440452	Not significant	Not significant
ywpJ	Hydrolase (HAD superfamily);HAD family hydrolase;Uncharacterized phosphatase YwpJ;Putative hydrolase;hypothetical protein;Cof family hydrolase;Haloacid dehalogenase-like hydrolase domain protein	10	16	45	29	0.0667756	0.412587	-1.27723	0.181818	0.355556	-0.173737	0.440452	Not significant	Not significant
yxdM	ABC3 transporter permease protein domain-containing protein;ABC transporter permease protein YxdM;Efflux ABC transporter permease protein	10	16	45	29	0.0667756	0.412587	-1.27723	0.181818	0.355556	-0.173737	0.440452	Not significant	Not significant
group_2759	Rhodanese-like domain protein;Pyridine nucleotide-disulfide oxidoreductase;Rhodanese family protein	21	26	34	19	0.0698998	0.458573	-1.12478	0.381818	0.577778	-0.19596	0.440452	Not significant	Not significant
group_1069	hypothetical protein;HTH araC/xylS-type domain-containing protein	7	1	48	44	0.0701859	4.58763	2.19775	0.127273	0.0222222	0.105051	0.440452	Not significant	Not significant
group_11965	Multidrug transporter	7	1	48	44	0.0701859	4.58763	2.19775	0.127273	0.0222222	0.105051	0.440452	Not significant	Not significant
group_15514	HTH merR-type domain-containing protein	7	1	48	44	0.0701859	4.58763	2.19775	0.127273	0.0222222	0.105051	0.440452	Not significant	Not significant
group_1679	16S rRNA processing protein RimM	7	1	48	44	0.0701859	4.58763	2.19775	0.127273	0.0222222	0.105051	0.440452	Not significant	Not significant
group_17057	hypothetical protein	7	1	48	44	0.0701859	4.58763	2.19775	0.127273	0.0222222	0.105051	0.440452	Not significant	Not significant
group_17133	Sensor histidine kinase;Signal transduction histidine kinase internal region domain-containing protein	7	1	48	44	0.0701859	4.58763	2.19775	0.127273	0.0222222	0.105051	0.440452	Not significant	Not significant
group_17287	Replication initiation protein	7	1	48	44	0.0701859	4.58763	2.19775	0.127273	0.0222222	0.105051	0.440452	Not significant	Not significant
group_17515	Lipid kinase;Putative lipid kinase	7	1	48	44	0.0701859	4.58763	2.19775	0.127273	0.0222222	0.105051	0.440452	Not significant	Not significant
group_17588	Lipoprotein	7	1	48	44	0.0701859	4.58763	2.19775	0.127273	0.0222222	0.105051	0.440452	Not significant	Not significant
group_18644	Membrane-associated serine protease rhomboid family	7	1	48	44	0.0701859	4.58763	2.19775	0.127273	0.0222222	0.105051	0.440452	Not significant	Not significant
group_18740	rod shape-determining protein MreD	7	1	48	44	0.0701859	4.58763	2.19775	0.127273	0.0222222	0.105051	0.440452	Not significant	Not significant
group_18788	DNA-binding response regulator	7	1	48	44	0.0701859	4.58763	2.19775	0.127273	0.0222222	0.105051	0.440452	Not significant	Not significant
group_18789	ABC transmembrane type-1 domain-containing protein;ABC transporter permease subunit	7	1	48	44	0.0701859	4.58763	2.19775	0.127273	0.0222222	0.105051	0.440452	Not significant	Not significant
group_18810	Integral membrane protein	7	1	48	44	0.0701859	4.58763	2.19775	0.127273	0.0222222	0.105051	0.440452	Not significant	Not significant
group_18885	Transposase	7	1	48	44	0.0701859	4.58763	2.19775	0.127273	0.0222222	0.105051	0.440452	Not significant	Not significant
group_18953	hypothetical protein	7	1	48	44	0.0701859	4.58763	2.19775	0.127273	0.0222222	0.105051	0.440452	Not significant	Not significant
group_19176	Lipoprotein	7	1	48	44	0.0701859	4.58763	2.19775	0.127273	0.0222222	0.105051	0.440452	Not significant	Not significant
group_20454	Prolipoprotein diacylglyceryl transferase;Diacylglyceryl transferase	7	1	48	44	0.0701859	4.58763	2.19775	0.127273	0.0222222	0.105051	0.440452	Not significant	Not significant
group_20608	DUF3278 domain-containing protein	7	1	48	44	0.0701859	4.58763	2.19775	0.127273	0.0222222	0.105051	0.440452	Not significant	Not significant
group_20661	DUF1878 domain-containing protein	7	1	48	44	0.0701859	4.58763	2.19775	0.127273	0.0222222	0.105051	0.440452	Not significant	Not significant
group_21770	Integral membrane protein;hypothetical protein	7	1	48	44	0.0701859	4.58763	2.19775	0.127273	0.0222222	0.105051	0.440452	Not significant	Not significant
group_3031	Glycosyl hydrolase family 8;Family 8 glycosyl transferase;glycosyltransferase family 8 protein	7	1	48	44	0.0701859	4.58763	2.19775	0.127273	0.0222222	0.105051	0.440452	Not significant	Not significant
group_6100	ABC transmembrane type-1 domain-containing protein	7	1	48	44	0.0701859	4.58763	2.19775	0.127273	0.0222222	0.105051	0.440452	Not significant	Not significant
lipO	Sugar ABC transporter substrate-binding protein;Lipoprotein LipO	7	1	48	44	0.0701859	4.58763	2.19775	0.127273	0.0222222	0.105051	0.440452	Not significant	Not significant
group_806	HTH cro/C1-type domain-containing protein	19	8	36	37	0.0725324	2.35697	1.23693	0.345455	0.177778	0.167677	0.440452	Not significant	Not significant
glgP	Alpha-14 glucan phosphorylase	11	17	44	28	0.0725756	0.420867	-1.24856	0.2	0.377778	-0.177778	0.440452	Not significant	Not significant
group_1985	ABC transporter domain-containing protein;ABC transporter ATP-binding protein;hypothetical protein;Multidrug ABC transporter	11	17	44	28	0.0725756	0.420867	-1.24856	0.2	0.377778	-0.177778	0.440452	Not significant	Not significant
group_2384	DNA-binding protein;DUF536 domain-containing protein;Regulator of chromosome segregation-like C-terminal domain-containing protein	11	17	44	28	0.0725756	0.420867	-1.24856	0.2	0.377778	-0.177778	0.440452	Not significant	Not significant
group_2744	SAM-dependent methyltransferase;Bcl-2 family protein;tRNA (Adenine(22)-N(1))-methyltransferase	11	17	44	28	0.0725756	0.420867	-1.24856	0.2	0.377778	-0.177778	0.440452	Not significant	Not significant
group_2899	Endonuclease/exonuclease/phosphatase family protein;Endonuclease/exonuclease/phosphatase domain-containing protein	11	17	44	28	0.0725756	0.420867	-1.24856	0.2	0.377778	-0.177778	0.440452	Not significant	Not significant
asp1	Accessory secretory protein Asp1;accessory Sec system protein Asp1;Accessory Sec system protein Asp1	2	7	53	38	0.0742702	0.239875	-2.05964	0.0363636	0.155556	-0.119192	0.440452	Not significant	Not significant
asp2	Accessory Sec system protein Asp2;accessory Sec system protein Asp2	2	7	53	38	0.0742702	0.239875	-2.05964	0.0363636	0.155556	-0.119192	0.440452	Not significant	Not significant
blaR1	Regulatory protein BlaR1;Antirepressor regulating drug resistance;Putative membrane-associated Zn-dependent protease	2	7	53	38	0.0742702	0.239875	-2.05964	0.0363636	0.155556	-0.119192	0.440452	Not significant	Not significant
draG	ADP-ribosyl-[dinitrogen reductase] glycohydrolase;ADP-ribosylglycohydrolase;Hydrolase;ADP-ribosylglycohydrolase family protein;ADP-ribosylhydrolase	2	7	53	38	0.0742702	0.239875	-2.05964	0.0363636	0.155556	-0.119192	0.440452	Not significant	Not significant
epsL	Putative sugar transferase EpsL;Undecaprenyl-phosphate galactose phosphotransferase	2	7	53	38	0.0742702	0.239875	-2.05964	0.0363636	0.155556	-0.119192	0.440452	Not significant	Not significant
group_16044	TfoX N-terminal domain-containing protein	2	7	53	38	0.0742702	0.239875	-2.05964	0.0363636	0.155556	-0.119192	0.440452	Not significant	Not significant
group_16481	Glycerol uptake facilitator protein putative	2	7	53	38	0.0742702	0.239875	-2.05964	0.0363636	0.155556	-0.119192	0.440452	Not significant	Not significant
group_16610	type 1 glycerol-3-phosphate oxidase	2	7	53	38	0.0742702	0.239875	-2.05964	0.0363636	0.155556	-0.119192	0.440452	Not significant	Not significant
group_16611	Mga helix-turn-helix domain-containing protein	2	7	53	38	0.0742702	0.239875	-2.05964	0.0363636	0.155556	-0.119192	0.440452	Not significant	Not significant
group_16880	anthranilate synthase component I	2	7	53	38	0.0742702	0.239875	-2.05964	0.0363636	0.155556	-0.119192	0.440452	Not significant	Not significant
group_17165	tryptophan synthase subunit alpha	2	7	53	38	0.0742702	0.239875	-2.05964	0.0363636	0.155556	-0.119192	0.440452	Not significant	Not significant
group_18499	SH3 domain-containing protein;choline binding-anchored murein hydrolase CbpD;Autolysin	2	7	53	38	0.0742702	0.239875	-2.05964	0.0363636	0.155556	-0.119192	0.440452	Not significant	Not significant
group_1858	Gram-positive cocci surface proteins LPxTG domain-containing protein;Cna B-type domain-containing protein;Alcohol dehydrogenase;SpaA isopeptide-forming pilin-related protein	2	7	53	38	0.0742702	0.239875	-2.05964	0.0363636	0.155556	-0.119192	0.440452	Not significant	Not significant
group_18596	indole-3-glycerol phosphate synthase TrpC	2	7	53	38	0.0742702	0.239875	-2.05964	0.0363636	0.155556	-0.119192	0.440452	Not significant	Not significant
group_18638	hypothetical protein;FUSC family protein;Fusaric acid resistance protein-like	2	7	53	38	0.0742702	0.239875	-2.05964	0.0363636	0.155556	-0.119192	0.440452	Not significant	Not significant
group_18809	tryptophan synthase subunit beta	2	7	53	38	0.0742702	0.239875	-2.05964	0.0363636	0.155556	-0.119192	0.440452	Not significant	Not significant
group_18853	Phage-related chromosomal island protein	2	7	53	38	0.0742702	0.239875	-2.05964	0.0363636	0.155556	-0.119192	0.440452	Not significant	Not significant
group_19114	DUF4336 domain-containing protein	2	7	53	38	0.0742702	0.239875	-2.05964	0.0363636	0.155556	-0.119192	0.440452	Not significant	Not significant
group_19120	ABC3 transporter permease protein domain-containing protein	2	7	53	38	0.0742702	0.239875	-2.05964	0.0363636	0.155556	-0.119192	0.440452	Not significant	Not significant
group_19141	phage major capsid protein	2	7	53	38	0.0742702	0.239875	-2.05964	0.0363636	0.155556	-0.119192	0.440452	Not significant	Not significant
group_19419	DUF3021 domain-containing protein	2	7	53	38	0.0742702	0.239875	-2.05964	0.0363636	0.155556	-0.119192	0.440452	Not significant	Not significant
group_19661	Anthranilate phosphoribosyltransferase	2	7	53	38	0.0742702	0.239875	-2.05964	0.0363636	0.155556	-0.119192	0.440452	Not significant	Not significant
group_19662	phosphoribosylanthranilate isomerase	2	7	53	38	0.0742702	0.239875	-2.05964	0.0363636	0.155556	-0.119192	0.440452	Not significant	Not significant
group_19998	TfoX N-terminal domain-containing protein	2	7	53	38	0.0742702	0.239875	-2.05964	0.0363636	0.155556	-0.119192	0.440452	Not significant	Not significant
group_19999	Recombinase	2	7	53	38	0.0742702	0.239875	-2.05964	0.0363636	0.155556	-0.119192	0.440452	Not significant	Not significant
group_20061	DUF2922 domain-containing protein;Ubiquitin-like domain-containing protein	2	7	53	38	0.0742702	0.239875	-2.05964	0.0363636	0.155556	-0.119192	0.440452	Not significant	Not significant
group_20381	DUF5052 domain-containing protein	2	7	53	38	0.0742702	0.239875	-2.05964	0.0363636	0.155556	-0.119192	0.440452	Not significant	Not significant
group_20406	Phage protein	2	7	53	38	0.0742702	0.239875	-2.05964	0.0363636	0.155556	-0.119192	0.440452	Not significant	Not significant
group_20472	CDP-diglyceride synthetase	2	7	53	38	0.0742702	0.239875	-2.05964	0.0363636	0.155556	-0.119192	0.440452	Not significant	Not significant
group_20519	PhnB-like domain-containing protein	2	7	53	38	0.0742702	0.239875	-2.05964	0.0363636	0.155556	-0.119192	0.440452	Not significant	Not significant
group_20743	Integron-associated effector binding protein domain-containing protein	2	7	53	38	0.0742702	0.239875	-2.05964	0.0363636	0.155556	-0.119192	0.440452	Not significant	Not significant
group_20760	Phage protein;hypothetical protein	2	7	53	38	0.0742702	0.239875	-2.05964	0.0363636	0.155556	-0.119192	0.440452	Not significant	Not significant
group_20839	Phosphoenolpyruvate synthase	2	7	53	38	0.0742702	0.239875	-2.05964	0.0363636	0.155556	-0.119192	0.440452	Not significant	Not significant
group_20861	Ring-cleavage extradiol dioxygenase putative;Catechol-23-dioxygenase;Glyoxalase family protein;Glyoxalase domain protein	2	7	53	38	0.0742702	0.239875	-2.05964	0.0363636	0.155556	-0.119192	0.440452	Not significant	Not significant
group_20865	Bifunctional transcriptional activator/DNA repair enzyme AdaA	2	7	53	38	0.0742702	0.239875	-2.05964	0.0363636	0.155556	-0.119192	0.440452	Not significant	Not significant
group_21061	CDP-alcohol phosphatidyltransferase	2	7	53	38	0.0742702	0.239875	-2.05964	0.0363636	0.155556	-0.119192	0.440452	Not significant	Not significant
group_21155	HAMP domain-containing protein	2	7	53	38	0.0742702	0.239875	-2.05964	0.0363636	0.155556	-0.119192	0.440452	Not significant	Not significant
group_21207	Phosphatidylserine decarboxylase	2	7	53	38	0.0742702	0.239875	-2.05964	0.0363636	0.155556	-0.119192	0.440452	Not significant	Not significant
group_21262	Thioredoxin family protein;Thioredoxin domain-containing protein;Peptide methionine sulfoxide reductase MsrA/MsrB	2	7	53	38	0.0742702	0.239875	-2.05964	0.0363636	0.155556	-0.119192	0.440452	Not significant	Not significant
group_21285	Prenyltransferase	2	7	53	38	0.0742702	0.239875	-2.05964	0.0363636	0.155556	-0.119192	0.440452	Not significant	Not significant
group_21326	Pentapeptide MXKDX repeat protein;Lipoprotein	2	7	53	38	0.0742702	0.239875	-2.05964	0.0363636	0.155556	-0.119192	0.440452	Not significant	Not significant
group_21349	phosphoenolpyruvate synthase	2	7	53	38	0.0742702	0.239875	-2.05964	0.0363636	0.155556	-0.119192	0.440452	Not significant	Not significant
group_21366	Glycosyltransferase;Exopolysaccharide biosynthesis protein	2	7	53	38	0.0742702	0.239875	-2.05964	0.0363636	0.155556	-0.119192	0.440452	Not significant	Not significant
group_21383	thiol-disulfide oxidoreductase-associated membrane protein CcdA2	2	7	53	38	0.0742702	0.239875	-2.05964	0.0363636	0.155556	-0.119192	0.440452	Not significant	Not significant
group_21399	N-acetyltransferase domain-containing protein	2	7	53	38	0.0742702	0.239875	-2.05964	0.0363636	0.155556	-0.119192	0.440452	Not significant	Not significant
group_21440	HD domain-containing protein	2	7	53	38	0.0742702	0.239875	-2.05964	0.0363636	0.155556	-0.119192	0.440452	Not significant	Not significant
group_21508	DUF304 domain-containing protein	2	7	53	38	0.0742702	0.239875	-2.05964	0.0363636	0.155556	-0.119192	0.440452	Not significant	Not significant
group_21666	DUF4956 domain-containing protein	2	7	53	38	0.0742702	0.239875	-2.05964	0.0363636	0.155556	-0.119192	0.440452	Not significant	Not significant
group_21681	DUF2992 domain-containing protein	2	7	53	38	0.0742702	0.239875	-2.05964	0.0363636	0.155556	-0.119192	0.440452	Not significant	Not significant
group_21718	DUF1722 domain-containing protein	2	7	53	38	0.0742702	0.239875	-2.05964	0.0363636	0.155556	-0.119192	0.440452	Not significant	Not significant
group_21772	VTC domain-containing protein	2	7	53	38	0.0742702	0.239875	-2.05964	0.0363636	0.155556	-0.119192	0.440452	Not significant	Not significant
group_2743	UDP-N-acetylmuramoylalanyl-D-glutamate--2 6-diaminopimelate ligase;YiiX/YebB-like N1pC/P60 family cysteine hydrolase	2	7	53	38	0.0742702	0.239875	-2.05964	0.0363636	0.155556	-0.119192	0.440452	Not significant	Not significant
group_2767	UPF0310 protein TW70_00626;UPF0310 protein HMPREF9380_2045;UPF0310 protein SSA_0254	2	7	53	38	0.0742702	0.239875	-2.05964	0.0363636	0.155556	-0.119192	0.440452	Not significant	Not significant
group_2878	Bro-N domain-containing protein;Fic domain protein	2	7	53	38	0.0742702	0.239875	-2.05964	0.0363636	0.155556	-0.119192	0.440452	Not significant	Not significant
group_3057	Poly-beta-16-N-acetyl-D-glucosamine N-deacetylase	2	7	53	38	0.0742702	0.239875	-2.05964	0.0363636	0.155556	-0.119192	0.440452	Not significant	Not significant
group_3588	glycerol kinase GlpK	2	7	53	38	0.0742702	0.239875	-2.05964	0.0363636	0.155556	-0.119192	0.440452	Not significant	Not significant
group_761	Glycosyl transferase family 2 protein;Glycosyl transferase;Glycosyltransferase;Glycosyltransferase group 2 family protein	2	7	53	38	0.0742702	0.239875	-2.05964	0.0363636	0.155556	-0.119192	0.440452	Not significant	Not significant
group_845	Transcriptional regulator BlaI/MecI/CopY family;Penicillinase repressor;BlaI/MecI/CopY family transcriptional regulator	2	7	53	38	0.0742702	0.239875	-2.05964	0.0363636	0.155556	-0.119192	0.440452	Not significant	Not significant
group_846	Integral membrane protein;DUF1304 domain-containing protein	2	7	53	38	0.0742702	0.239875	-2.05964	0.0363636	0.155556	-0.119192	0.440452	Not significant	Not significant
group_900	Cell wall biosynthesis glycosyltransferase;Glycosyltransferase;Glycosyltransferase group 2 family protein	2	7	53	38	0.0742702	0.239875	-2.05964	0.0363636	0.155556	-0.119192	0.440452	Not significant	Not significant
group_9198	Alkylhydroperoxidase family enzyme contains CxxC motif	2	7	53	38	0.0742702	0.239875	-2.05964	0.0363636	0.155556	-0.119192	0.440452	Not significant	Not significant
group_974	Suppressor of fused-like domain-containing protein	2	7	53	38	0.0742702	0.239875	-2.05964	0.0363636	0.155556	-0.119192	0.440452	Not significant	Not significant
nicR	HTH-type transcriptional repressor NicR;HTH marR-type domain-containing protein	2	7	53	38	0.0742702	0.239875	-2.05964	0.0363636	0.155556	-0.119192	0.440452	Not significant	Not significant
secY2	accessory Sec system protein translocase subunit SecY2	2	7	53	38	0.0742702	0.239875	-2.05964	0.0363636	0.155556	-0.119192	0.440452	Not significant	Not significant
group_1402	Integrase catalytic domain-containing protein;IS30 family transposase	4	9	51	36	0.0762677	0.335718	-1.57468	0.0727273	0.2	-0.127273	0.440452	Not significant	Not significant
group_15773	MutG family lantibiotic protection ABC transporter permease subunit	4	9	51	36	0.0762677	0.335718	-1.57468	0.0727273	0.2	-0.127273	0.440452	Not significant	Not significant
group_16306	hypothetical protein	4	9	51	36	0.0762677	0.335718	-1.57468	0.0727273	0.2	-0.127273	0.440452	Not significant	Not significant
group_17419	ABC transporter ATP-binding protein	4	9	51	36	0.0762677	0.335718	-1.57468	0.0727273	0.2	-0.127273	0.440452	Not significant	Not significant
group_17420	histidine kinase	4	9	51	36	0.0762677	0.335718	-1.57468	0.0727273	0.2	-0.127273	0.440452	Not significant	Not significant
group_17487	ASCH domain-containing protein	4	9	51	36	0.0762677	0.335718	-1.57468	0.0727273	0.2	-0.127273	0.440452	Not significant	Not significant
group_17678	Phosphotransferase system EIIC domain-containing protein	4	9	51	36	0.0762677	0.335718	-1.57468	0.0727273	0.2	-0.127273	0.440452	Not significant	Not significant
group_17710	Phage-Barnase-EndoU-ColicinE5/D-RelE like nuclease 4 domain-containing protein	4	9	51	36	0.0762677	0.335718	-1.57468	0.0727273	0.2	-0.127273	0.440452	Not significant	Not significant
group_1777	HTH cro/C1-type domain-containing protein;Helix-turn-helix protein;helix-turn-helix transcriptional regulator;Transcriptional regulator;DNA-binding helix-turn-helix protein	4	9	51	36	0.0762677	0.335718	-1.57468	0.0727273	0.2	-0.127273	0.440452	Not significant	Not significant
group_18071	MutG family lantibiotic protection ABC transporter permease subunit	4	9	51	36	0.0762677	0.335718	-1.57468	0.0727273	0.2	-0.127273	0.440452	Not significant	Not significant
group_18118	HTH marR-type domain-containing protein	4	9	51	36	0.0762677	0.335718	-1.57468	0.0727273	0.2	-0.127273	0.440452	Not significant	Not significant
group_18276	Transcriptional regulator;Transcriptional regulator ComX1	4	9	51	36	0.0762677	0.335718	-1.57468	0.0727273	0.2	-0.127273	0.440452	Not significant	Not significant
group_18281	Metal-dependent membrane protease	4	9	51	36	0.0762677	0.335718	-1.57468	0.0727273	0.2	-0.127273	0.440452	Not significant	Not significant
group_18864	Beta-glucoside-specific EII permease	4	9	51	36	0.0762677	0.335718	-1.57468	0.0727273	0.2	-0.127273	0.440452	Not significant	Not significant
group_19379	TetR/AcrR family transcriptional regulator;Tetracyclin repressor-like C-terminal domain-containing protein;Transcriptional regulator TetR family;HTH tetR-type domain-containing protein	4	9	51	36	0.0762677	0.335718	-1.57468	0.0727273	0.2	-0.127273	0.440452	Not significant	Not significant
group_19415	cystathionine gamma-synthase;Cystathionine gamma-synthase	4	9	51	36	0.0762677	0.335718	-1.57468	0.0727273	0.2	-0.127273	0.440452	Not significant	Not significant
group_19438	Nudix hydrolase domain-containing protein;dATP pyrophosphohydrolase;NUDIX domain protein;Dihydroneopterin triphosphate pyrophosphohydrolase	4	9	51	36	0.0762677	0.335718	-1.57468	0.0727273	0.2	-0.127273	0.440452	Not significant	Not significant
group_1979	ABC-2 family transporter protein;ABC-2 type transporter	4	9	51	36	0.0762677	0.335718	-1.57468	0.0727273	0.2	-0.127273	0.440452	Not significant	Not significant
group_19974	N-acetyltransferase domain-containing protein;GNAT family N-acetyltransferase;Acetyltransferase;hypothetical protein	4	9	51	36	0.0762677	0.335718	-1.57468	0.0727273	0.2	-0.127273	0.440452	Not significant	Not significant
group_2001	histidine kinase	4	9	51	36	0.0762677	0.335718	-1.57468	0.0727273	0.2	-0.127273	0.440452	Not significant	Not significant
group_20149	hypothetical protein;Flavin reductase	4	9	51	36	0.0762677	0.335718	-1.57468	0.0727273	0.2	-0.127273	0.440452	Not significant	Not significant
group_20160	GDP-L-fucose synthase;hypothetical protein	4	9	51	36	0.0762677	0.335718	-1.57468	0.0727273	0.2	-0.127273	0.440452	Not significant	Not significant
group_20209	4-hydroxy-tetrahydrodipicolinate reductase	4	9	51	36	0.0762677	0.335718	-1.57468	0.0727273	0.2	-0.127273	0.440452	Not significant	Not significant
group_21208	Aryl-phospho-beta-D-glucosidase BglH;Putative aryl-phospho-beta-D-glucosidase BglH;6-phospho-beta-glucosidase;Glycosyl hydrolase family 1;Glycoside hydrolase	4	9	51	36	0.0762677	0.335718	-1.57468	0.0727273	0.2	-0.127273	0.440452	Not significant	Not significant
group_21301	N-acetyltransferase domain-containing protein;Acetyltransferase GNAT family	4	9	51	36	0.0762677	0.335718	-1.57468	0.0727273	0.2	-0.127273	0.440452	Not significant	Not significant
group_21783	HAD superfamily hydrolase;Cof-like protein hydrolase	4	9	51	36	0.0762677	0.335718	-1.57468	0.0727273	0.2	-0.127273	0.440452	Not significant	Not significant
group_2547	ABC transporter permease	4	9	51	36	0.0762677	0.335718	-1.57468	0.0727273	0.2	-0.127273	0.440452	Not significant	Not significant
group_2561	Helix-turn-helix transcriptional regulator;Transcriptional regulator;Helix-turn-helix family protein;Transcriptional activator	4	9	51	36	0.0762677	0.335718	-1.57468	0.0727273	0.2	-0.127273	0.440452	Not significant	Not significant
group_2655	Elongation factor Tu	4	9	51	36	0.0762677	0.335718	-1.57468	0.0727273	0.2	-0.127273	0.440452	Not significant	Not significant
group_7904	DNA-binding response regulator	4	9	51	36	0.0762677	0.335718	-1.57468	0.0727273	0.2	-0.127273	0.440452	Not significant	Not significant
traX~~~laaN	conjugal transfer protein TraX;Protein TraX;Conserved membrane protein;TraX protein;Membrane protein LaaN;TraX family protein	4	9	51	36	0.0762677	0.335718	-1.57468	0.0727273	0.2	-0.127273	0.440452	Not significant	Not significant
yjdF	YjdF family protein;DUF2992 domain-containing protein	4	9	51	36	0.0762677	0.335718	-1.57468	0.0727273	0.2	-0.127273	0.440452	Not significant	Not significant
group_1675	Nudix hydrolase domain-containing protein;Phosphohydrolase	7	13	48	32	0.0768674	0.372279	-1.42554	0.127273	0.288889	-0.161616	0.440452	Not significant	Not significant
group_1680	SIALI-17 repeat-containing surface protein;Beta-galactosidase;LPXTG cell wall anchor domain-containing protein;hypothetical protein	7	13	48	32	0.0768674	0.372279	-1.42554	0.127273	0.288889	-0.161616	0.440452	Not significant	Not significant
group_2895	Dsg protein involved in extracellular polysaccharide synthesis and transport;Transporter;Major facilitator superfamily (MFS) profile domain-containing protein;Permease	7	13	48	32	0.0768674	0.372279	-1.42554	0.127273	0.288889	-0.161616	0.440452	Not significant	Not significant
group_2925	pyrroline-5-carboxylate reductase	7	13	48	32	0.0768674	0.372279	-1.42554	0.127273	0.288889	-0.161616	0.440452	Not significant	Not significant
group_6977	YolD-like protein	7	13	48	32	0.0768674	0.372279	-1.42554	0.127273	0.288889	-0.161616	0.440452	Not significant	Not significant
tetM	tetracycline resistance determinant leader peptide;tetracycline resistance ribosomal protection protein Tet(M)	7	13	48	32	0.0768674	0.372279	-1.42554	0.127273	0.288889	-0.161616	0.440452	Not significant	Not significant
udg4	Chlorohydrolase;hypothetical protein;Uracil-DNA glycosylase	7	13	48	32	0.0768674	0.372279	-1.42554	0.127273	0.288889	-0.161616	0.440452	Not significant	Not significant
fbp	Fructose-16-bisphosphatase class 3;fructose-16-bisphosphatase;Fructose-16-bisphosphatase;Firmicute fructose-16-bisphosphatase domain protein	12	18	43	27	0.0784032	0.427151	-1.22718	0.218182	0.4	-0.181818	0.440452	Not significant	Not significant
group_21765	DUF4190 domain-containing protein	12	18	43	27	0.0784032	0.427151	-1.22718	0.218182	0.4	-0.181818	0.440452	Not significant	Not significant
group_2133	DNA-directed RNA polymerase subunit beta';DNA-directed RNA polymerase subunit beta;DNA-directed RNA polymerase;DNA-directed RNA polymerase subunit	43	27	12	18	0.0784032	2.34109	1.22718	0.781818	0.6	0.181818	0.440452	Not significant	Not significant
group_2184	DNA-directed RNA polymerase subunit beta;DNA-directed RNA polymerase	43	27	12	18	0.0784032	2.34109	1.22718	0.781818	0.6	0.181818	0.440452	Not significant	Not significant
group_2018	Glycosyl hydrolase;Glycoside hydrolase family 1;6-phospho-beta-glucosidase;Aryl-phospho-beta-D-glucosidase BglH;Glycosyl hydrolase family 1;Putative 6-phospho-beta-glucosidase	35	36	20	9	0.0813096	0.450718	-1.1497	0.636364	0.8	-0.163636	0.440452	Not significant	Not significant
cwlO	Peptidase C51 domain-containing protein;CHAP domain protein;Peptidoglycan DL-endopeptidase CwlO;Putative secreted protein;amidase;CHAP domain-containing protein;Secreted antigen GbpB/SagA putative peptidoglycan hydrolase;General stress protein GSP-781;Putative stress protein	44	42	11	3	0.0815423	0.31867	-1.64986	0.8	0.933333	-0.133333	0.440452	Not significant	Not significant
group_1335	ribose-phosphate diphosphokinase	44	42	11	3	0.0815423	0.31867	-1.64986	0.8	0.933333	-0.133333	0.440452	Not significant	Not significant
group_2474	AraC-type arabinose-binding/dimerisation domain-containing protein;LD-carboxypeptidase LdcB/DacB;Peptidase M15B domain-containing protein;hypothetical protein;D-alanyl-D-alanine carboxypeptidase	44	42	11	3	0.0815423	0.31867	-1.64986	0.8	0.933333	-0.133333	0.440452	Not significant	Not significant
group_2914	Nitroreductase domain-containing protein;Dihydropteridine reductase;Putative NAD(P)H nitroreductase;Nitroreductase;Putative NAD(P)H nitroreductase Spy0809;nitroreductase family protein	44	42	11	3	0.0815423	0.31867	-1.64986	0.8	0.933333	-0.133333	0.440452	Not significant	Not significant
mscS~~~ykuT	Small conductance mechanosensitive ion channel protein;Small-conductance mechanosensitive channel;Transporter small conductance mechanosensitive ion channel MscS family protein;Mechanosensitive ion channel family protein;Putative MscS family protein YkuT;Small-conductance mechanosensitive efflux channel;hypothetical protein	44	42	11	3	0.0815423	0.31867	-1.64986	0.8	0.933333	-0.133333	0.440452	Not significant	Not significant
nagA	N-acetylglucosamine-6-phosphate deacetylase	44	42	11	3	0.0815423	0.31867	-1.64986	0.8	0.933333	-0.133333	0.440452	Not significant	Not significant
asnA	aspartate--ammonia ligase	11	3	44	42	0.0815423	3.13804	1.64986	0.2	0.0666667	0.133333	0.440452	Not significant	Not significant
group_17056	Transcriptional regulator contains XRE-family HTH domain;XRE family transcriptional regulator	11	3	44	42	0.0815423	3.13804	1.64986	0.2	0.0666667	0.133333	0.440452	Not significant	Not significant
group_19605	Helicase BlpT	11	3	44	42	0.0815423	3.13804	1.64986	0.2	0.0666667	0.133333	0.440452	Not significant	Not significant
group_19873	Transporter;Major facilitator superfamily (MFS) profile domain-containing protein	11	3	44	42	0.0815423	3.13804	1.64986	0.2	0.0666667	0.133333	0.440452	Not significant	Not significant
thiT	energy-coupled thiamine transporter ThiT	11	3	44	42	0.0815423	3.13804	1.64986	0.2	0.0666667	0.133333	0.440452	Not significant	Not significant
ecfA1	energy-coupling factor ABC transporter ATP-binding protein	13	18	42	27	0.0871424	0.472178	-1.0826	0.236364	0.4	-0.163636	0.440452	Not significant	Not significant
group_2350	Acetyltransferase;Maltose acetyltransferase	13	18	42	27	0.0871424	0.472178	-1.0826	0.236364	0.4	-0.163636	0.440452	Not significant	Not significant
group_2583	HAD hydrolase family IA variant 1;HAD superfamily hydrolase;HAD-superfamily hydrolase	13	18	42	27	0.0871424	0.472178	-1.0826	0.236364	0.4	-0.163636	0.440452	Not significant	Not significant
holB	DNA polymerase III subunit delta';DNA polymerase III delta prime subunit	13	18	42	27	0.0871424	0.472178	-1.0826	0.236364	0.4	-0.163636	0.440452	Not significant	Not significant
epsJ	Glycosyltransferase group 2 family protein;Putative glycosyltransferase EpsJ	1	5	54	40	0.0875226	0.202669	-2.3028	0.0181818	0.111111	-0.0929293	0.440452	Not significant	Not significant
group_10498	Phage endolysin	1	5	54	40	0.0875226	0.202669	-2.3028	0.0181818	0.111111	-0.0929293	0.440452	Not significant	Not significant
group_1216	Lipoprotein-releasing system ATP-binding protein LolD;Peptidase C39 domain protein	1	5	54	40	0.0875226	0.202669	-2.3028	0.0181818	0.111111	-0.0929293	0.440452	Not significant	Not significant
group_1250	ABC transporter family protein	1	5	54	40	0.0875226	0.202669	-2.3028	0.0181818	0.111111	-0.0929293	0.440452	Not significant	Not significant
group_1283	WXG superfamily LXG domain protein;hypothetical protein;Virulence protein;Phage protein;virulence protein	1	5	54	40	0.0875226	0.202669	-2.3028	0.0181818	0.111111	-0.0929293	0.440452	Not significant	Not significant
group_1416	Adhesin domain-containing protein	1	5	54	40	0.0875226	0.202669	-2.3028	0.0181818	0.111111	-0.0929293	0.440452	Not significant	Not significant
group_14295	Transposase	1	5	54	40	0.0875226	0.202669	-2.3028	0.0181818	0.111111	-0.0929293	0.440452	Not significant	Not significant
group_14666	Putative IS1167 transposase domain protein	1	5	54	40	0.0875226	0.202669	-2.3028	0.0181818	0.111111	-0.0929293	0.440452	Not significant	Not significant
group_15608	Phage protein	1	5	54	40	0.0875226	0.202669	-2.3028	0.0181818	0.111111	-0.0929293	0.440452	Not significant	Not significant
group_15670	Glutamyl-tRNA amidotransferase	1	5	54	40	0.0875226	0.202669	-2.3028	0.0181818	0.111111	-0.0929293	0.440452	Not significant	Not significant
group_15731	Phage protein	1	5	54	40	0.0875226	0.202669	-2.3028	0.0181818	0.111111	-0.0929293	0.440452	Not significant	Not significant
group_1579	ABC transporter permease	1	5	54	40	0.0875226	0.202669	-2.3028	0.0181818	0.111111	-0.0929293	0.440452	Not significant	Not significant
group_16148	phage major capsid protein	1	5	54	40	0.0875226	0.202669	-2.3028	0.0181818	0.111111	-0.0929293	0.440452	Not significant	Not significant
group_16206	hypothetical protein	1	5	54	40	0.0875226	0.202669	-2.3028	0.0181818	0.111111	-0.0929293	0.440452	Not significant	Not significant
group_16207	head-tail connector protein	1	5	54	40	0.0875226	0.202669	-2.3028	0.0181818	0.111111	-0.0929293	0.440452	Not significant	Not significant
group_16312	Phage protein	1	5	54	40	0.0875226	0.202669	-2.3028	0.0181818	0.111111	-0.0929293	0.440452	Not significant	Not significant
group_16334	Prophage pi2 protein 40;hypothetical protein	1	5	54	40	0.0875226	0.202669	-2.3028	0.0181818	0.111111	-0.0929293	0.440452	Not significant	Not significant
group_16383	VRR-NUC domain-containing protein	1	5	54	40	0.0875226	0.202669	-2.3028	0.0181818	0.111111	-0.0929293	0.440452	Not significant	Not significant
group_16773	ATP-dependent Clp protease proteolytic subunit	1	5	54	40	0.0875226	0.202669	-2.3028	0.0181818	0.111111	-0.0929293	0.440452	Not significant	Not significant
group_16803	Zinc-finger protein	1	5	54	40	0.0875226	0.202669	-2.3028	0.0181818	0.111111	-0.0929293	0.440452	Not significant	Not significant
group_16833	Glycosyltransferase	1	5	54	40	0.0875226	0.202669	-2.3028	0.0181818	0.111111	-0.0929293	0.440452	Not significant	Not significant
group_17092	Recombinase family protein	1	5	54	40	0.0875226	0.202669	-2.3028	0.0181818	0.111111	-0.0929293	0.440452	Not significant	Not significant
group_17147	Oxidoreductase;NAD(P)-binding domain-containing protein;NmrA-like dehydrogenase/reductase	1	5	54	40	0.0875226	0.202669	-2.3028	0.0181818	0.111111	-0.0929293	0.440452	Not significant	Not significant
group_17355	Peptidase S74 domain-containing protein	1	5	54	40	0.0875226	0.202669	-2.3028	0.0181818	0.111111	-0.0929293	0.440452	Not significant	Not significant
group_17553	Prophage pi2 protein 38	1	5	54	40	0.0875226	0.202669	-2.3028	0.0181818	0.111111	-0.0929293	0.440452	Not significant	Not significant
group_17572	DUF2800 domain-containing protein	1	5	54	40	0.0875226	0.202669	-2.3028	0.0181818	0.111111	-0.0929293	0.440452	Not significant	Not significant
group_17629	Helicase ATP-binding domain-containing protein	1	5	54	40	0.0875226	0.202669	-2.3028	0.0181818	0.111111	-0.0929293	0.440452	Not significant	Not significant
group_17630	hypothetical protein	1	5	54	40	0.0875226	0.202669	-2.3028	0.0181818	0.111111	-0.0929293	0.440452	Not significant	Not significant
group_17646	DUF3601 domain-containing protein	1	5	54	40	0.0875226	0.202669	-2.3028	0.0181818	0.111111	-0.0929293	0.440452	Not significant	Not significant
group_17691	Phage protein	1	5	54	40	0.0875226	0.202669	-2.3028	0.0181818	0.111111	-0.0929293	0.440452	Not significant	Not significant
group_17692	N-acetylmuramoyl-L-alanine amidase	1	5	54	40	0.0875226	0.202669	-2.3028	0.0181818	0.111111	-0.0929293	0.440452	Not significant	Not significant
group_17854	Terminase large subunit-like endonuclease domain-containing protein;Terminase large subunit	1	5	54	40	0.0875226	0.202669	-2.3028	0.0181818	0.111111	-0.0929293	0.440452	Not significant	Not significant
group_18035	Phage protein	1	5	54	40	0.0875226	0.202669	-2.3028	0.0181818	0.111111	-0.0929293	0.440452	Not significant	Not significant
group_18054	Tetratricopeptide repeat protein	1	5	54	40	0.0875226	0.202669	-2.3028	0.0181818	0.111111	-0.0929293	0.440452	Not significant	Not significant
group_18063	methionine adenosyltransferase	1	5	54	40	0.0875226	0.202669	-2.3028	0.0181818	0.111111	-0.0929293	0.440452	Not significant	Not significant
group_18155	Head-tail adaptor protein	1	5	54	40	0.0875226	0.202669	-2.3028	0.0181818	0.111111	-0.0929293	0.440452	Not significant	Not significant
group_18180	hypothetical protein	1	5	54	40	0.0875226	0.202669	-2.3028	0.0181818	0.111111	-0.0929293	0.440452	Not significant	Not significant
group_18224	phage tail protein	1	5	54	40	0.0875226	0.202669	-2.3028	0.0181818	0.111111	-0.0929293	0.440452	Not significant	Not significant
group_18259	SF3 helicase domain-containing protein	1	5	54	40	0.0875226	0.202669	-2.3028	0.0181818	0.111111	-0.0929293	0.440452	Not significant	Not significant
group_18578	Methyltransferase	1	5	54	40	0.0875226	0.202669	-2.3028	0.0181818	0.111111	-0.0929293	0.440452	Not significant	Not significant
group_18599	Alpha-L-Rha alpha-13-L-rhamnosyltransferase;Rhamnan synthesis protein F family protein	1	5	54	40	0.0875226	0.202669	-2.3028	0.0181818	0.111111	-0.0929293	0.440452	Not significant	Not significant
group_19056	Prophage pi2 protein 37	1	5	54	40	0.0875226	0.202669	-2.3028	0.0181818	0.111111	-0.0929293	0.440452	Not significant	Not significant
group_19104	DUF4314 domain-containing protein	1	5	54	40	0.0875226	0.202669	-2.3028	0.0181818	0.111111	-0.0929293	0.440452	Not significant	Not significant
group_19649	DNA (cytosine-5-)-methyltransferase	1	5	54	40	0.0875226	0.202669	-2.3028	0.0181818	0.111111	-0.0929293	0.440452	Not significant	Not significant
group_19678	Cell surface protein;C protein alpha-antigen;hypothetical protein	1	5	54	40	0.0875226	0.202669	-2.3028	0.0181818	0.111111	-0.0929293	0.440452	Not significant	Not significant
group_19733	Phage protein	1	5	54	40	0.0875226	0.202669	-2.3028	0.0181818	0.111111	-0.0929293	0.440452	Not significant	Not significant
group_19987	HTH tetR-type domain-containing protein	1	5	54	40	0.0875226	0.202669	-2.3028	0.0181818	0.111111	-0.0929293	0.440452	Not significant	Not significant
group_20357	DUF1294 domain-containing protein	1	5	54	40	0.0875226	0.202669	-2.3028	0.0181818	0.111111	-0.0929293	0.440452	Not significant	Not significant
group_20509	Integral membrane protein	1	5	54	40	0.0875226	0.202669	-2.3028	0.0181818	0.111111	-0.0929293	0.440452	Not significant	Not significant
group_20761	hypothetical protein	1	5	54	40	0.0875226	0.202669	-2.3028	0.0181818	0.111111	-0.0929293	0.440452	Not significant	Not significant
group_20823	Major facilitator superfamily (MFS) profile domain-containing protein	1	5	54	40	0.0875226	0.202669	-2.3028	0.0181818	0.111111	-0.0929293	0.440452	Not significant	Not significant
group_21361	Histidine kinase N-terminal 7TM region domain-containing protein	1	5	54	40	0.0875226	0.202669	-2.3028	0.0181818	0.111111	-0.0929293	0.440452	Not significant	Not significant
group_21501	LicD-family phosphotransferase;Putative LicD-family phosphotransferase;hypothetical protein;LicD family protein;LICD family protein	1	5	54	40	0.0875226	0.202669	-2.3028	0.0181818	0.111111	-0.0929293	0.440452	Not significant	Not significant
group_21533	Lipoprotein;Alpha-L-rhamnosidase	1	5	54	40	0.0875226	0.202669	-2.3028	0.0181818	0.111111	-0.0929293	0.440452	Not significant	Not significant
group_21605	Putative glycosyltransferase EpsJ;hypothetical protein	1	5	54	40	0.0875226	0.202669	-2.3028	0.0181818	0.111111	-0.0929293	0.440452	Not significant	Not significant
group_21657	Immunity protein;Immunity protein BlpL	1	5	54	40	0.0875226	0.202669	-2.3028	0.0181818	0.111111	-0.0929293	0.440452	Not significant	Not significant
group_21764	Transposase;DUF2187 domain-containing protein	1	5	54	40	0.0875226	0.202669	-2.3028	0.0181818	0.111111	-0.0929293	0.440452	Not significant	Not significant
group_293	Glycosyltransferase family 2 protein;glycosyltransferase	1	5	54	40	0.0875226	0.202669	-2.3028	0.0181818	0.111111	-0.0929293	0.440452	Not significant	Not significant
group_3008	CRISPR-associated protein Cas7;CRISPR-associated protein Csn2-St	1	5	54	40	0.0875226	0.202669	-2.3028	0.0181818	0.111111	-0.0929293	0.440452	Not significant	Not significant
group_4213	phage portal protein	1	5	54	40	0.0875226	0.202669	-2.3028	0.0181818	0.111111	-0.0929293	0.440452	Not significant	Not significant
group_4522	General stress protein A	1	5	54	40	0.0875226	0.202669	-2.3028	0.0181818	0.111111	-0.0929293	0.440452	Not significant	Not significant
group_5272	23-butanediol dehydrogenase	1	5	54	40	0.0875226	0.202669	-2.3028	0.0181818	0.111111	-0.0929293	0.440452	Not significant	Not significant
group_571	DUF1310 domain-containing protein	1	5	54	40	0.0875226	0.202669	-2.3028	0.0181818	0.111111	-0.0929293	0.440452	Not significant	Not significant
group_590	DNA-binding helix-turn-helix protein	1	5	54	40	0.0875226	0.202669	-2.3028	0.0181818	0.111111	-0.0929293	0.440452	Not significant	Not significant
group_645	hypothetical protein	1	5	54	40	0.0875226	0.202669	-2.3028	0.0181818	0.111111	-0.0929293	0.440452	Not significant	Not significant
group_672	DUF2283 domain-containing protein	1	5	54	40	0.0875226	0.202669	-2.3028	0.0181818	0.111111	-0.0929293	0.440452	Not significant	Not significant
group_6795	Rep	1	5	54	40	0.0875226	0.202669	-2.3028	0.0181818	0.111111	-0.0929293	0.440452	Not significant	Not significant
group_689	Lipoprotein;Alpha-L-rhamnosidase	1	5	54	40	0.0875226	0.202669	-2.3028	0.0181818	0.111111	-0.0929293	0.440452	Not significant	Not significant
group_690	Lipoprotein	1	5	54	40	0.0875226	0.202669	-2.3028	0.0181818	0.111111	-0.0929293	0.440452	Not significant	Not significant
group_696	Lipoprotein;TipC family immunity protein	1	5	54	40	0.0875226	0.202669	-2.3028	0.0181818	0.111111	-0.0929293	0.440452	Not significant	Not significant
group_7059	IS3 family transposase ORF B;IS3 family transposase	1	5	54	40	0.0875226	0.202669	-2.3028	0.0181818	0.111111	-0.0929293	0.440452	Not significant	Not significant
group_741	Chromosome partition protein Smc	1	5	54	40	0.0875226	0.202669	-2.3028	0.0181818	0.111111	-0.0929293	0.440452	Not significant	Not significant
group_7561	Phage tail protein	1	5	54	40	0.0875226	0.202669	-2.3028	0.0181818	0.111111	-0.0929293	0.440452	Not significant	Not significant
group_809	hypothetical protein;Conserved domain protein	1	5	54	40	0.0875226	0.202669	-2.3028	0.0181818	0.111111	-0.0929293	0.440452	Not significant	Not significant
group_865	Transposase	1	5	54	40	0.0875226	0.202669	-2.3028	0.0181818	0.111111	-0.0929293	0.440452	Not significant	Not significant
group_9846	Phage protein	1	5	54	40	0.0875226	0.202669	-2.3028	0.0181818	0.111111	-0.0929293	0.440452	Not significant	Not significant
group_986	Putative glycosyltransferase;Beta-13-glucosyltransferase;glycosyltransferase	1	5	54	40	0.0875226	0.202669	-2.3028	0.0181818	0.111111	-0.0929293	0.440452	Not significant	Not significant
group_9969	phage terminase small subunit P27 family	1	5	54	40	0.0875226	0.202669	-2.3028	0.0181818	0.111111	-0.0929293	0.440452	Not significant	Not significant
group_3009	Amino acid ABC transporter ATP-binding protein;ABC-type polar amino acid transport system ATPase component;ATP-binding cassette domain-containing protein;ABC superfamily ATP binding cassette transporter ABC protein;Glutamine transport ATP-binding protein GlnQ;ABC transporter domain-containing protein	32	34	23	11	0.09007	0.460993	-1.11718	0.581818	0.755556	-0.173737	0.440452	Not significant	Not significant
yecS~~~hisM	Amino acid ABC transporter permease protein;ABC transporter permease protein;Inner membrane amino-acid ABC transporter permease protein YecS;ABC transporter membrane-spanning permease-glutamine transport;ABC transporter permease subunit;ABC transmembrane type-1 domain-containing protein;ABC-type amino acid transport system permease component	32	34	23	11	0.09007	0.460993	-1.11718	0.581818	0.755556	-0.173737	0.440452	Not significant	Not significant
bglB	Beta-glucosidase/6-phospho-beta-glucosidase/beta-galactosidase;6-phospho-beta-glucosidase	8	13	47	32	0.0902547	0.430799	-1.21491	0.145455	0.288889	-0.143434	0.440452	Not significant	Not significant
group_1102	Zinc protease;Peptidase M16 inactive domain protein;Putative zinc protease;Putative zinc-dependent peptidase	8	13	47	32	0.0902547	0.430799	-1.21491	0.145455	0.288889	-0.143434	0.440452	Not significant	Not significant
group_163	histidine kinase	8	13	47	32	0.0902547	0.430799	-1.21491	0.145455	0.288889	-0.143434	0.440452	Not significant	Not significant
group_19943	Integrative and conjugative element protein	8	13	47	32	0.0902547	0.430799	-1.21491	0.145455	0.288889	-0.143434	0.440452	Not significant	Not significant
group_20485	DNA-cytosine methylase	8	13	47	32	0.0902547	0.430799	-1.21491	0.145455	0.288889	-0.143434	0.440452	Not significant	Not significant
group_20690	F0F1 ATP synthase subunit delta	8	13	47	32	0.0902547	0.430799	-1.21491	0.145455	0.288889	-0.143434	0.440452	Not significant	Not significant
group_2800	Competence protein CoiA-like protein;Competence protein putative;Competence protein CoiA	8	13	47	32	0.0902547	0.430799	-1.21491	0.145455	0.288889	-0.143434	0.440452	Not significant	Not significant
group_527	thiamine diphosphokinase	8	13	47	32	0.0902547	0.430799	-1.21491	0.145455	0.288889	-0.143434	0.440452	Not significant	Not significant
group_945	CHAP domain protein;Peptidase C51 domain-containing protein;N-acetylmuramoyl-L-alanine amidase;Secreted protein putative function in cell-wall metabolism (Amidase) putative;hypothetical protein	8	13	47	32	0.0902547	0.430799	-1.21491	0.145455	0.288889	-0.143434	0.440452	Not significant	Not significant
jag	RNA-binding cell elongation regulator Jag/EloR	8	13	47	32	0.0902547	0.430799	-1.21491	0.145455	0.288889	-0.143434	0.440452	Not significant	Not significant
ribF	hypothetical protein;bifunctional riboflavin kinase/FAD synthetase	8	13	47	32	0.0902547	0.430799	-1.21491	0.145455	0.288889	-0.143434	0.440452	Not significant	Not significant
traX	Protein TraX;Beta-carotene 1515'-monooxygenase;TraX family protein	8	13	47	32	0.0902547	0.430799	-1.21491	0.145455	0.288889	-0.143434	0.440452	Not significant	Not significant
yaaA	S4 domain-containing protein YaaA;S4 domain protein YaaA	8	13	47	32	0.0902547	0.430799	-1.21491	0.145455	0.288889	-0.143434	0.440452	Not significant	Not significant
group_20049	Phage-Barnase-EndoU-ColicinE5/D-RelE like nuclease 3 domain-containing protein	5	10	50	35	0.091981	0.368223	-1.44135	0.0909091	0.222222	-0.131313	0.440452	Not significant	Not significant
group_20918	Chlorohydrolase	5	10	50	35	0.091981	0.368223	-1.44135	0.0909091	0.222222	-0.131313	0.440452	Not significant	Not significant
group_2857	ATP-dependent zinc metalloprotease FtsH;ATP-dependent metallopeptidase FtsH/Yme1/Tma family protein;ATP-dependent metalloprotease;Putative cell division protein ftsH;Cell division protein FtsH	40	25	15	20	0.0929469	2.10057	1.07078	0.727273	0.555556	0.171717	0.440452	Not significant	Not significant
tatC	twin-arginine translocase subunit TatC;Sec-independent protein translocase protein TatC	16	21	39	24	0.0958475	0.476008	-1.07094	0.290909	0.466667	-0.175758	0.440452	Not significant	Not significant
group_20901	SAG1386/EF1546 family surface-associated protein	9	14	46	31	0.0978393	0.443826	-1.17193	0.163636	0.311111	-0.147475	0.440452	Not significant	Not significant
group_21741	Peptidyl-prolyl cis-trans isomerase	9	14	46	31	0.0978393	0.443826	-1.17193	0.163636	0.311111	-0.147475	0.440452	Not significant	Not significant
group_3099	membrane protein insertase YidC	9	14	46	31	0.0978393	0.443826	-1.17193	0.163636	0.311111	-0.147475	0.440452	Not significant	Not significant
group_898	DUF2179 domain-containing protein	9	14	46	31	0.0978393	0.443826	-1.17193	0.163636	0.311111	-0.147475	0.440452	Not significant	Not significant
lepB	signal peptidase I	9	14	46	31	0.0978393	0.443826	-1.17193	0.163636	0.311111	-0.147475	0.440452	Not significant	Not significant
rodZ	cytoskeleton protein RodZ;hypothetical protein;Helix-turn-helix domain-containing protein	9	14	46	31	0.0978393	0.443826	-1.17193	0.163636	0.311111	-0.147475	0.440452	Not significant	Not significant
wefK~~~yiaH	Repeating unit O-acetyltransferase WefK;Inner membrane protein YiaH;Acetyltransferase;Acyltransferase 3 domain-containing protein;Acyltransferase family protein;Acyltransferase	9	14	46	31	0.0978393	0.443826	-1.17193	0.163636	0.311111	-0.147475	0.440452	Not significant	Not significant
yfgQ	Cation-transporting ATPase yfgQ;Putative cation-transporting ATPase;Cation-transporting P-type ATPase N-terminal domain-containing protein;HAD-IC family P-type ATPase	9	14	46	31	0.0978393	0.443826	-1.17193	0.163636	0.311111	-0.147475	0.440452	Not significant	Not significant
glpE	Rhodanese-like domain-containing protein;Thiosulfate sulfurtransferase GlpE;Rhodanese domain-containing protein	17	22	38	23	0.0987426	0.474747	-1.07477	0.309091	0.488889	-0.179798	0.440452	Not significant	Not significant
group_847	Phosphoribosylcarboxyaminoimidazole (NCAIR) mutase;N5-carboxyaminoimidazole ribonucleotide mutase	28	31	27	14	0.101629	0.477056	-1.06777	0.509091	0.688889	-0.179798	0.440452	Not significant	Not significant
group_2215	4-hydroxy-tetrahydrodipicolinate synthase/N-acetylneuraminate lyase;N-acetylneuraminate lyase;Putative N-acetylneuraminate lyase	43	41	12	4	0.10264	0.377349	-1.40603	0.781818	0.911111	-0.129293	0.440452	Not significant	Not significant
group_1141	Cof-type HAD-IIB family hydrolase;Cof-like hydrolase;HAD family phosphatase;Putative phosphatase;HAD superfamily hydrolase;hypothetical protein	12	4	43	41	0.10264	2.65006	1.40603	0.218182	0.0888889	0.129293	0.440452	Not significant	Not significant
group_3107	HD domain-containing protein;HD domain protein;hypothetical protein	12	4	43	41	0.10264	2.65006	1.40603	0.218182	0.0888889	0.129293	0.440452	Not significant	Not significant
group_3111	glutamate racemase	12	4	43	41	0.10264	2.65006	1.40603	0.218182	0.0888889	0.129293	0.440452	Not significant	Not significant
group_3112	dITP/XTP pyrophosphatase;hypothetical protein;nucleoside-triphosphate diphosphatase	12	4	43	41	0.10264	2.65006	1.40603	0.218182	0.0888889	0.129293	0.440452	Not significant	Not significant
group_3115	Phosphoesterase	12	4	43	41	0.10264	2.65006	1.40603	0.218182	0.0888889	0.129293	0.440452	Not significant	Not significant
group_3116	cyclic-di-AMP-binding protein CbpB	12	4	43	41	0.10264	2.65006	1.40603	0.218182	0.0888889	0.129293	0.440452	Not significant	Not significant
group_3125	Putative tRNA (cytidine(34)-2'-O)-methyltransferase;hypothetical protein;TrmH family RNA methyltransferase;tRNA (uridine(34)/cytosine(34)/5-carboxymethylaminomethyluridine(34)-2'-O)-methyltransferase TrmL	12	4	43	41	0.10264	2.65006	1.40603	0.218182	0.0888889	0.129293	0.440452	Not significant	Not significant
group_7105	transcription elongation factor GreA	12	4	43	41	0.10264	2.65006	1.40603	0.218182	0.0888889	0.129293	0.440452	Not significant	Not significant
group_7110	acylphosphatase	12	4	43	41	0.10264	2.65006	1.40603	0.218182	0.0888889	0.129293	0.440452	Not significant	Not significant
group_7118	Diaminopimelate decarboxylase;Putative diaminopimelate decarboxylase	12	4	43	41	0.10264	2.65006	1.40603	0.218182	0.0888889	0.129293	0.440452	Not significant	Not significant
group_7127	segregation/condensation protein A;ScpA/B-like protein	12	4	43	41	0.10264	2.65006	1.40603	0.218182	0.0888889	0.129293	0.440452	Not significant	Not significant
group_7128	SMC-Scp complex subunit ScpB	12	4	43	41	0.10264	2.65006	1.40603	0.218182	0.0888889	0.129293	0.440452	Not significant	Not significant
group_7133	Pseudouridylate synthase RsuA specific for 16S rRNA U516 and 23S rRNA U2605;Pseudouridine synthase	12	4	43	41	0.10264	2.65006	1.40603	0.218182	0.0888889	0.129293	0.440452	Not significant	Not significant
group_7135	membrane protein insertion efficiency factor YidD	12	4	43	41	0.10264	2.65006	1.40603	0.218182	0.0888889	0.129293	0.440452	Not significant	Not significant
spoU	rRNA methylase;rRNA/tRNA methylase;Putative rRNA methylase;RNA methyltransferase;SpoU rRNA methylase family protein;RNA 2'-O ribose methyltransferase substrate binding family protein;RNA 2-O ribose methyltransferase substrate binding domain-containing protein	12	4	43	41	0.10264	2.65006	1.40603	0.218182	0.0888889	0.129293	0.440452	Not significant	Not significant
amiF~~~oppF	Oligopeptide transport ATP-binding protein AmiF;ABC transporter ATP-binding protein;Oligopeptide ABC transporter ATP-binding protein AmiF;Putative oligopeptide ABC transporter ATP-binding protein OppF	46	43	9	2	0.105114	0.281307	-1.82978	0.836364	0.955556	-0.119192	0.440452	Not significant	Not significant
apt	adenine phosphoribosyltransferase	46	43	9	2	0.105114	0.281307	-1.82978	0.836364	0.955556	-0.119192	0.440452	Not significant	Not significant
arlR~~~csrR~~~ompR	Response regulator;Response regulator ArlR;Response regulator CsrR;DNA-binding response regulator OmpR family contains REC and winged-helix (wHTH) domain;Response regulator receiver domain protein;response regulator	46	43	9	2	0.105114	0.281307	-1.82978	0.836364	0.955556	-0.119192	0.440452	Not significant	Not significant
aspS	aspartate--tRNA ligase	9	2	46	43	0.105114	3.55484	1.82978	0.163636	0.0444444	0.119192	0.440452	Not significant	Not significant
atpB	F0F1 ATP synthase subunit A	46	43	9	2	0.105114	0.281307	-1.82978	0.836364	0.955556	-0.119192	0.440452	Not significant	Not significant
atpF	F0F1 ATP synthase subunit B;ATP synthase subunit b	46	43	9	2	0.105114	0.281307	-1.82978	0.836364	0.955556	-0.119192	0.440452	Not significant	Not significant
azlD	Branched-chain amino acid transport protein;Branched-chain amino acid transport protein (AzlD);AzlD domain-containing protein;Branched-chain amino acid transporter AzlD;Branched-chain amino acid transport protein azlD;Branched-chain amino acid transport protein AzlD;Branched-chain amino acid permease	46	43	9	2	0.105114	0.281307	-1.82978	0.836364	0.955556	-0.119192	0.440452	Not significant	Not significant
dnaD	DNA replication protein DnaD;Homoserine O-succinyltransferase;DnaD domain protein;DnaD domain-containing protein;Chromosome replication initiation protein dnaD;Replication initiation and membrane attachment protein DnaB/DnaD family	46	43	9	2	0.105114	0.281307	-1.82978	0.836364	0.955556	-0.119192	0.440452	Not significant	Not significant
dnaK	molecular chaperone DnaK;Chaperone protein;Chaperone protein DnaK;Hsp70 family protein	46	43	9	2	0.105114	0.281307	-1.82978	0.836364	0.955556	-0.119192	0.440452	Not significant	Not significant
dut	dUTP diphosphatase;Deoxyuridine 5'-triphosphate nucleotidohydrolase	46	43	9	2	0.105114	0.281307	-1.82978	0.836364	0.955556	-0.119192	0.440452	Not significant	Not significant
fabG	3-oxoacyl-ACP reductase	46	43	9	2	0.105114	0.281307	-1.82978	0.836364	0.955556	-0.119192	0.440452	Not significant	Not significant
glgA	glycogen synthase GlgA;Glycogen synthase ADP-glucose transglucosylase;Glycogen synthase	46	43	9	2	0.105114	0.281307	-1.82978	0.836364	0.955556	-0.119192	0.440452	Not significant	Not significant
glgB	14-alpha-glucan branching protein GlgB	46	43	9	2	0.105114	0.281307	-1.82978	0.836364	0.955556	-0.119192	0.440452	Not significant	Not significant
glgC	glucose-1-phosphate adenylyltransferase;Glucose-1-phosphate adenylyltransferase	46	43	9	2	0.105114	0.281307	-1.82978	0.836364	0.955556	-0.119192	0.440452	Not significant	Not significant
glgD	glucose-1-phosphate adenylyltransferase subunit GlgD;Glucose-1-phosphate adenylyltransferase subunit GlgD	46	43	9	2	0.105114	0.281307	-1.82978	0.836364	0.955556	-0.119192	0.440452	Not significant	Not significant
glmU	bifunctional UDP-N-acetylglucosamine diphosphorylase/glucosamine-1-phosphate N-acetyltransferase GlmU;Bifunctional protein GlmU	46	43	9	2	0.105114	0.281307	-1.82978	0.836364	0.955556	-0.119192	0.440452	Not significant	Not significant
gndA	NADP-dependent phosphogluconate dehydrogenase	46	43	9	2	0.105114	0.281307	-1.82978	0.836364	0.955556	-0.119192	0.440452	Not significant	Not significant
group_14541	50S ribosomal protein L33	9	2	46	43	0.105114	3.55484	1.82978	0.163636	0.0444444	0.119192	0.440452	Not significant	Not significant
group_14690	50S ribosomal protein L34	9	2	46	43	0.105114	3.55484	1.82978	0.163636	0.0444444	0.119192	0.440452	Not significant	Not significant
group_16124	HTH cro/C1-type domain-containing protein	9	2	46	43	0.105114	3.55484	1.82978	0.163636	0.0444444	0.119192	0.440452	Not significant	Not significant
group_16627	50S ribosomal protein L33	46	43	9	2	0.105114	0.281307	-1.82978	0.836364	0.955556	-0.119192	0.440452	Not significant	Not significant
group_17755	50S ribosomal protein L28	46	43	9	2	0.105114	0.281307	-1.82978	0.836364	0.955556	-0.119192	0.440452	Not significant	Not significant
group_18452	50S ribosomal protein L32	46	43	9	2	0.105114	0.281307	-1.82978	0.836364	0.955556	-0.119192	0.440452	Not significant	Not significant
group_21374	Spermidine synthase;hypothetical protein	46	43	9	2	0.105114	0.281307	-1.82978	0.836364	0.955556	-0.119192	0.440452	Not significant	Not significant
group_21447	Glutamine ABC transporter substrate-binding protein;ABC transmembrane type-1 domain-containing protein;ABC uptake transporter substrate binding protein /membrane-spanning protein;ABC-type amino acid transport/signal transduction system periplasmic component/domain;Amino acid ABC transporter substrate-binding protein;hypothetical protein;transporter substrate-binding domain-containing protein	46	43	9	2	0.105114	0.281307	-1.82978	0.836364	0.955556	-0.119192	0.440452	Not significant	Not significant
group_21590	Bacteriocin immunity protein	9	2	46	43	0.105114	3.55484	1.82978	0.163636	0.0444444	0.119192	0.440452	Not significant	Not significant
group_21668	histidine--tRNA ligase	9	2	46	43	0.105114	3.55484	1.82978	0.163636	0.0444444	0.119192	0.440452	Not significant	Not significant
group_2192	DNA polymerase I	46	43	9	2	0.105114	0.281307	-1.82978	0.836364	0.955556	-0.119192	0.440452	Not significant	Not significant
group_2799	8-oxo-dGTP pyrophosphatase MutT and related house-cleaning NTP pyrophosphohydrolases NUDIX family;NUDIX hydrolase;Hydrolase NUDIX family;DNA mismatch repair protein MutT;MutT/nudix family protein;MutT/NUDIX family protein;putative ADP-ribose pyrophosphatase;ADP-ribose pyrophosphatase	46	43	9	2	0.105114	0.281307	-1.82978	0.836364	0.955556	-0.119192	0.440452	Not significant	Not significant
group_2833	X-Pro aminopeptidase;Xaa-Pro aminopeptidase	9	2	46	43	0.105114	3.55484	1.82978	0.163636	0.0444444	0.119192	0.440452	Not significant	Not significant
group_2859	single-stranded-DNA-specific exonuclease RecJ;Single-stranded-DNA-specific exonuclease RecJ;hypothetical protein;Single-stranded-DNA-specific exonuclease C-terminal domain-containing protein	46	43	9	2	0.105114	0.281307	-1.82978	0.836364	0.955556	-0.119192	0.440452	Not significant	Not significant
group_287	F0F1 ATP synthase subunit C;hypothetical protein;ATP synthase subunit c	46	43	9	2	0.105114	0.281307	-1.82978	0.836364	0.955556	-0.119192	0.440452	Not significant	Not significant
group_2970	DNA gyrase subunit A	46	43	9	2	0.105114	0.281307	-1.82978	0.836364	0.955556	-0.119192	0.440452	Not significant	Not significant
group_2993	class 1b ribonucleoside-diphosphate reductase subunit alpha;ribonucleotide reductase N-terminal alpha domain-containing protein;Ribonucleotide reductase of class Ib (Aerobic) alpha subunit;Ribonucleoside-diphosphate reductase	46	43	9	2	0.105114	0.281307	-1.82978	0.836364	0.955556	-0.119192	0.440452	Not significant	Not significant
group_3029	LemA family protein;Protein LemA;Cytoplasmic membrane protein;LemA-like protein;Magnetosome formation protein MamQ lipoprotein antigen LemA family	46	43	9	2	0.105114	0.281307	-1.82978	0.836364	0.955556	-0.119192	0.440452	Not significant	Not significant
group_534	DUF2829 domain-containing protein;Methionine--tRNA ligase	46	43	9	2	0.105114	0.281307	-1.82978	0.836364	0.955556	-0.119192	0.440452	Not significant	Not significant
group_6972	GTPase HflX	46	43	9	2	0.105114	0.281307	-1.82978	0.836364	0.955556	-0.119192	0.440452	Not significant	Not significant
grpE	nucleotide exchange factor GrpE;Protein GrpE	46	43	9	2	0.105114	0.281307	-1.82978	0.836364	0.955556	-0.119192	0.440452	Not significant	Not significant
hflC~~~hflK~~~ybbK	Regulator of protease activity HflC stomatin/prohibitin superfamily;Modulator of FtsH protease HflK;SPFH domain-containing protein;Putative stomatin/prohibitin-family membrane protease subunit YbbK;Spfh domain/band 7 family;Stomatin/prohibitin-like membrane protease subunits	46	43	9	2	0.105114	0.281307	-1.82978	0.836364	0.955556	-0.119192	0.440452	Not significant	Not significant
hisS	histidine--tRNA ligase;Histidine--tRNA ligase	46	43	9	2	0.105114	0.281307	-1.82978	0.836364	0.955556	-0.119192	0.440452	Not significant	Not significant
hrcA~~~deoR	heat-inducible transcriptional repressor HrcA;DeoR family transcriptional regulator	46	43	9	2	0.105114	0.281307	-1.82978	0.836364	0.955556	-0.119192	0.440452	Not significant	Not significant
htpX	zinc metalloprotease HtpX;Protease HtpX-like protein;M48 family metalloprotease	46	43	9	2	0.105114	0.281307	-1.82978	0.836364	0.955556	-0.119192	0.440452	Not significant	Not significant
ideR~~~mntR~~~scaR~~~marR	Iron-dependent repressor IdeR;Iron-dependent transcriptional regulator;Mn-dependent transcriptional regulator MntR;Iron-dependent repressor;Fe/Mn-dependent transcriptional repressor ScaR;HTH dtxR-type domain-containing protein;Diphtheria toxin repressor;Putative transcriptional regulator;MarR family transcriptional regulator;metal-dependent transcriptional regulator;Transcriptional regulator MntR…	46	43	9	2	0.105114	0.281307	-1.82978	0.836364	0.955556	-0.119192	0.440452	Not significant	Not significant
khpA	RNA-binding protein KhpA	46	43	9	2	0.105114	0.281307	-1.82978	0.836364	0.955556	-0.119192	0.440452	Not significant	Not significant
ldh~~~mdh	L-lactate dehydrogenase	46	43	9	2	0.105114	0.281307	-1.82978	0.836364	0.955556	-0.119192	0.440452	Not significant	Not significant
miaA	tRNA (adenosine(37)-N6)-dimethylallyltransferase MiaA;hypothetical protein;tRNAdelta(2)-isopentenylpyrophosphatetransferase;isopentenyl transferase family protein;tRNA dimethylallyltransferase	46	43	9	2	0.105114	0.281307	-1.82978	0.836364	0.955556	-0.119192	0.440452	Not significant	Not significant
mscL	large conductance mechanosensitive channel protein MscL;Large-conductance mechanosensitive channel	46	43	9	2	0.105114	0.281307	-1.82978	0.836364	0.955556	-0.119192	0.440452	Not significant	Not significant
mtnN	5'-methylthioadenosine/S-adenosylhomocysteine nucleosidase;5'-methylthioadenosine/adenosylhomocysteine nucleosidase	46	43	9	2	0.105114	0.281307	-1.82978	0.836364	0.955556	-0.119192	0.440452	Not significant	Not significant
nifU~~~iscU	SUF system NifU family Fe-S cluster assembly protein	46	43	9	2	0.105114	0.281307	-1.82978	0.836364	0.955556	-0.119192	0.440452	Not significant	Not significant
nrdF	class 1b ribonucleoside-diphosphate reductase subunit beta	46	43	9	2	0.105114	0.281307	-1.82978	0.836364	0.955556	-0.119192	0.440452	Not significant	Not significant
nrdH	Glutaredoxin-like protein NrdH;glutaredoxin-like protein NrdH;Glutaredoxin	46	43	9	2	0.105114	0.281307	-1.82978	0.836364	0.955556	-0.119192	0.440452	Not significant	Not significant
oppB~~~gsiC~~~amiC	ABC transporter permease protein;ABC transporter permease;Oligopeptide transport system permease;Oligopeptide transport system permease protein OppB;Glutathione transport system permease protein GsiC;Oligopeptide transport system permease protein AmiC	46	43	9	2	0.105114	0.281307	-1.82978	0.836364	0.955556	-0.119192	0.440452	Not significant	Not significant
oppC	oligopeptide ABC transporter permease OppC	46	43	9	2	0.105114	0.281307	-1.82978	0.836364	0.955556	-0.119192	0.440452	Not significant	Not significant
oppD~~~amiE	Oligopeptide transport ATP-binding protein;ABC transporter ATP-binding protein;Oligopeptide transport ATP-binding protein OppD;Oligopeptide ABC superfamily ATP binding cassette transporter ABC protein;Oligopeptide transport ATP-binding protein AmiE	46	43	9	2	0.105114	0.281307	-1.82978	0.836364	0.955556	-0.119192	0.440452	Not significant	Not significant
prmA	50S ribosomal protein L11 methyltransferase	46	43	9	2	0.105114	0.281307	-1.82978	0.836364	0.955556	-0.119192	0.440452	Not significant	Not significant
prs1	ribose-phosphate diphosphokinase	9	2	46	43	0.105114	3.55484	1.82978	0.163636	0.0444444	0.119192	0.440452	Not significant	Not significant
radA	DNA repair protein RadA;hypothetical protein	46	43	9	2	0.105114	0.281307	-1.82978	0.836364	0.955556	-0.119192	0.440452	Not significant	Not significant
rnz	ribonuclease Z;Ribonuclease Z	46	43	9	2	0.105114	0.281307	-1.82978	0.836364	0.955556	-0.119192	0.440452	Not significant	Not significant
rplA	50S ribosomal protein L1	46	43	9	2	0.105114	0.281307	-1.82978	0.836364	0.955556	-0.119192	0.440452	Not significant	Not significant
rplK	50S ribosomal protein L11;Large ribosomal subunit protein uL11	46	43	9	2	0.105114	0.281307	-1.82978	0.836364	0.955556	-0.119192	0.440452	Not significant	Not significant
rpmF	50S ribosomal protein L32	9	2	46	43	0.105114	3.55484	1.82978	0.163636	0.0444444	0.119192	0.440452	Not significant	Not significant
rpsP	30S ribosomal protein S16;Small ribosomal subunit protein bS16	46	43	9	2	0.105114	0.281307	-1.82978	0.836364	0.955556	-0.119192	0.440452	Not significant	Not significant
rsmE	16S rRNA (uracil(1498)-N(3))-methyltransferase;RsmE family RNA methyltransferase	46	43	9	2	0.105114	0.281307	-1.82978	0.836364	0.955556	-0.119192	0.440452	Not significant	Not significant
sarA~~~aliA~~~aliB~~~oppA	ABC transporter substrate-binding protein family 5;Peptide ABC transporter substrate-binding protein;Oligopeptide-binding lipoprotein;Solute-binding protein family 5 domain-containing protein;Oligopeptide-binding protein SarA;Oligopeptide permease AliA;Putative oligopeptide-binding protein AliB;hypothetical protein;Oligopeptide ABC transporter binding protein;Putative extracellular solute-binding…	46	43	9	2	0.105114	0.281307	-1.82978	0.836364	0.955556	-0.119192	0.440452	Not significant	Not significant
sufC	Fe-S cluster assembly ATPase SufC	46	43	9	2	0.105114	0.281307	-1.82978	0.836364	0.955556	-0.119192	0.440452	Not significant	Not significant
sufD	Fe-S cluster assembly protein SufD;hypothetical protein	46	43	9	2	0.105114	0.281307	-1.82978	0.836364	0.955556	-0.119192	0.440452	Not significant	Not significant
sufS	Cysteine desulfurase;Aminotransferase class V-fold PLP-dependent enzyme;cysteine desulfurase;Selenocysteine lyase/Cysteine desulfurase;aminotransferase class V-fold PLP-dependent enzyme;putative cysteine desulfurase	46	43	9	2	0.105114	0.281307	-1.82978	0.836364	0.955556	-0.119192	0.440452	Not significant	Not significant
tgt	tRNA-guanine transglycosylase;tRNA guanosine(34) transglycosylase Tgt	46	43	9	2	0.105114	0.281307	-1.82978	0.836364	0.955556	-0.119192	0.440452	Not significant	Not significant
tsaB	tRNA (adenosine(37)-N6)-threonylcarbamoyltransferase complex dimerization subunit type 1 TsaB	46	43	9	2	0.105114	0.281307	-1.82978	0.836364	0.955556	-0.119192	0.440452	Not significant	Not significant
uppP	undecaprenyl-diphosphate phosphatase	46	43	9	2	0.105114	0.281307	-1.82978	0.836364	0.955556	-0.119192	0.440452	Not significant	Not significant
yqjQ	Putative oxidoreductase;Short chain dehydrogenase/reductase family oxidoreductase;Short-chain dehydrogenase;Oxidoreductase;KR domain protein;Short chain dehydrogenase;Beta-galactosidase	46	43	9	2	0.105114	0.281307	-1.82978	0.836364	0.955556	-0.119192	0.440452	Not significant	Not significant
bglG~~~licT	Beta-glucoside bgl operon antiterminator BglG family;PRD domain-containing protein;CAT RNA-binding domain-containing protein;Beta-glucoside operon antiterminator;CAT RNA binding domain protein;Transcription antiterminator LicT	10	15	45	30	0.105391	0.454094	-1.13894	0.181818	0.333333	-0.151515	0.440452	Not significant	Not significant
group_1590	Gram-positive signal peptide protein YSIRK family;DUF2871 domain-containing protein	10	15	45	30	0.105391	0.454094	-1.13894	0.181818	0.333333	-0.151515	0.440452	Not significant	Not significant
group_2202	phosphoenolpyruvate carboxykinase (ATP)	10	15	45	30	0.105391	0.454094	-1.13894	0.181818	0.333333	-0.151515	0.440452	Not significant	Not significant
group_2701	DUF960 domain-containing protein;GTP cyclohydrolase I;GTP cyclohydrolase	10	15	45	30	0.105391	0.454094	-1.13894	0.181818	0.333333	-0.151515	0.440452	Not significant	Not significant
group_2858	Galactoside permease;Transporter major facilitator family protein;Putative 3-phenylpropionic acid transporter;Major facilitator superfamily (MFS) profile domain-containing protein	10	15	45	30	0.105391	0.454094	-1.13894	0.181818	0.333333	-0.151515	0.440452	Not significant	Not significant
csoR	Copper-sensing transcriptional repressor CsoR;Metal-sensing transcriptional repressor	19	23	36	22	0.107344	0.511513	-0.967158	0.345455	0.511111	-0.165657	0.440452	Not significant	Not significant
sdbB	thiol-disulfide oxidoreductase-associated lipoprotein SdbB	26	29	29	16	0.10737	0.502442	-0.992972	0.472727	0.644444	-0.171717	0.440452	Not significant	Not significant
purF	amidophosphoribosyltransferase;hypothetical protein;Amidophosphoribosyltransferase	49	34	6	11	0.107565	2.53846	1.34395	0.890909	0.755556	0.135354	0.440452	Not significant	Not significant
fer	Ferredoxin	6	11	49	34	0.107565	0.393939	-1.34395	0.109091	0.244444	-0.135354	0.440452	Not significant	Not significant
group_21449	Capsule synthesis positive regulator AcpB;Aspartate aminotransferase;Mga helix-turn-helix domain-containing protein;Transcriptional regulator;HTH domain-containing protein;hypothetical protein	6	11	49	34	0.107565	0.393939	-1.34395	0.109091	0.244444	-0.135354	0.440452	Not significant	Not significant
argG	argininosuccinate synthase	3	7	52	38	0.108487	0.342222	-1.54699	0.0545455	0.155556	-0.10101	0.440452	Not significant	Not significant
argH	argininosuccinate lyase	3	7	52	38	0.108487	0.342222	-1.54699	0.0545455	0.155556	-0.10101	0.440452	Not significant	Not significant
ccoS	Cbb3-type cytochrome oxidase assembly protein CcoS	3	7	52	38	0.108487	0.342222	-1.54699	0.0545455	0.155556	-0.10101	0.440452	Not significant	Not significant
ftsH	ATP-dependent zinc metalloprotease FtsH	3	7	52	38	0.108487	0.342222	-1.54699	0.0545455	0.155556	-0.10101	0.440452	Not significant	Not significant
group_1212	DUF402 domain-containing protein	3	7	52	38	0.108487	0.342222	-1.54699	0.0545455	0.155556	-0.10101	0.440452	Not significant	Not significant
group_130	Riboflavin transporter	3	7	52	38	0.108487	0.342222	-1.54699	0.0545455	0.155556	-0.10101	0.440452	Not significant	Not significant
group_13812	Anaerobic benzoate catabolism transcriptional regulator	3	7	52	38	0.108487	0.342222	-1.54699	0.0545455	0.155556	-0.10101	0.440452	Not significant	Not significant
group_1425	Prophage ps3 protein 13;Phage regulatory protein Rha (Phage_pRha)	3	7	52	38	0.108487	0.342222	-1.54699	0.0545455	0.155556	-0.10101	0.440452	Not significant	Not significant
group_1488	Phage protein	3	7	52	38	0.108487	0.342222	-1.54699	0.0545455	0.155556	-0.10101	0.440452	Not significant	Not significant
group_1497	AAA+ ATPase domain-containing protein	3	7	52	38	0.108487	0.342222	-1.54699	0.0545455	0.155556	-0.10101	0.440452	Not significant	Not significant
group_1577	Replication protein	3	7	52	38	0.108487	0.342222	-1.54699	0.0545455	0.155556	-0.10101	0.440452	Not significant	Not significant
group_1605	DUF3642 domain-containing protein;SP_0198 family lipoprotein	3	7	52	38	0.108487	0.342222	-1.54699	0.0545455	0.155556	-0.10101	0.440452	Not significant	Not significant
group_16233	HTH arsR-type domain-containing protein;hypothetical protein	3	7	52	38	0.108487	0.342222	-1.54699	0.0545455	0.155556	-0.10101	0.440452	Not significant	Not significant
group_16317	DNA-directed RNA polymerase subunit beta	3	7	52	38	0.108487	0.342222	-1.54699	0.0545455	0.155556	-0.10101	0.440452	Not significant	Not significant
group_1660	Glycerate kinase	3	7	52	38	0.108487	0.342222	-1.54699	0.0545455	0.155556	-0.10101	0.440452	Not significant	Not significant
group_1662	CYTH domain-containing protein	3	7	52	38	0.108487	0.342222	-1.54699	0.0545455	0.155556	-0.10101	0.440452	Not significant	Not significant
group_16879	VanZ-like domain-containing protein;VanZ-like protein;VanZF-related protein	3	7	52	38	0.108487	0.342222	-1.54699	0.0545455	0.155556	-0.10101	0.440452	Not significant	Not significant
group_16935	aminoacyl-tRNA hydrolase	3	7	52	38	0.108487	0.342222	-1.54699	0.0545455	0.155556	-0.10101	0.440452	Not significant	Not significant
group_16990	Protease synthase and sporulation negative regulatory protein PAI 1	3	7	52	38	0.108487	0.342222	-1.54699	0.0545455	0.155556	-0.10101	0.440452	Not significant	Not significant
group_1726	ABC transporter ATP-binding protein	3	7	52	38	0.108487	0.342222	-1.54699	0.0545455	0.155556	-0.10101	0.440452	Not significant	Not significant
group_1772	glutamate--tRNA ligase;Glutamate--tRNA ligase	3	7	52	38	0.108487	0.342222	-1.54699	0.0545455	0.155556	-0.10101	0.440452	Not significant	Not significant
group_1774	Alpha/beta hydrolase;Cell surface hydrolase	3	7	52	38	0.108487	0.342222	-1.54699	0.0545455	0.155556	-0.10101	0.440452	Not significant	Not significant
group_17830	Permeases of the major facilitator superfamily	3	7	52	38	0.108487	0.342222	-1.54699	0.0545455	0.155556	-0.10101	0.440452	Not significant	Not significant
group_1789	RND efflux pump membrane fusion protein barrel-sandwich domain-containing protein;ATP-binding cassette transporter-like protein	3	7	52	38	0.108487	0.342222	-1.54699	0.0545455	0.155556	-0.10101	0.440452	Not significant	Not significant
group_17951	Bacteriocin immunity protein;Lipoprotein	3	7	52	38	0.108487	0.342222	-1.54699	0.0545455	0.155556	-0.10101	0.440452	Not significant	Not significant
group_18106	N-acetyltransferase domain-containing protein	3	7	52	38	0.108487	0.342222	-1.54699	0.0545455	0.155556	-0.10101	0.440452	Not significant	Not significant
group_18212	DNA-directed RNA polymerase subunit beta'	3	7	52	38	0.108487	0.342222	-1.54699	0.0545455	0.155556	-0.10101	0.440452	Not significant	Not significant
group_18240	HTH LytTR-type domain-containing protein;LytTR family DNA-binding domain-containing protein	3	7	52	38	0.108487	0.342222	-1.54699	0.0545455	0.155556	-0.10101	0.440452	Not significant	Not significant
group_18653	transcription-repair coupling factor	3	7	52	38	0.108487	0.342222	-1.54699	0.0545455	0.155556	-0.10101	0.440452	Not significant	Not significant
group_18803	5-formyltetrahydrofolate cyclo-ligase	3	7	52	38	0.108487	0.342222	-1.54699	0.0545455	0.155556	-0.10101	0.440452	Not significant	Not significant
group_190	ATPase involved in DNA repair	3	7	52	38	0.108487	0.342222	-1.54699	0.0545455	0.155556	-0.10101	0.440452	Not significant	Not significant
group_192	GNAT family N-acetyltransferase;Acetyltransferase;N-acetyltransferase domain-containing protein	3	7	52	38	0.108487	0.342222	-1.54699	0.0545455	0.155556	-0.10101	0.440452	Not significant	Not significant
group_19273	DUF3278 domain-containing protein;PF11368 family protein	3	7	52	38	0.108487	0.342222	-1.54699	0.0545455	0.155556	-0.10101	0.440452	Not significant	Not significant
group_19695	Ribosomal 50S subunit-recycling heat shock protein contains S4 domain	3	7	52	38	0.108487	0.342222	-1.54699	0.0545455	0.155556	-0.10101	0.440452	Not significant	Not significant
group_20128	Primase C-terminal 1 domain-containing protein;hypothetical protein	3	7	52	38	0.108487	0.342222	-1.54699	0.0545455	0.155556	-0.10101	0.440452	Not significant	Not significant
group_20238	Nudix hydrolase domain-containing protein;NUDIX domain-containing protein;dATP pyrophosphohydrolase	3	7	52	38	0.108487	0.342222	-1.54699	0.0545455	0.155556	-0.10101	0.440452	Not significant	Not significant
group_20314	Septum formation initiator;Cell division protein DivIC;Septum formation initiator family protein	3	7	52	38	0.108487	0.342222	-1.54699	0.0545455	0.155556	-0.10101	0.440452	Not significant	Not significant
group_20345	Thioredoxin domain-containing protein;Thioredoxin	3	7	52	38	0.108487	0.342222	-1.54699	0.0545455	0.155556	-0.10101	0.440452	Not significant	Not significant
group_20347	Mobilization protein	3	7	52	38	0.108487	0.342222	-1.54699	0.0545455	0.155556	-0.10101	0.440452	Not significant	Not significant
group_20396	histidine kinase	3	7	52	38	0.108487	0.342222	-1.54699	0.0545455	0.155556	-0.10101	0.440452	Not significant	Not significant
group_20462	mRNA degradation ribonuclease J1/J2	3	7	52	38	0.108487	0.342222	-1.54699	0.0545455	0.155556	-0.10101	0.440452	Not significant	Not significant
group_20530	fluoride efflux transporter CrcB	3	7	52	38	0.108487	0.342222	-1.54699	0.0545455	0.155556	-0.10101	0.440452	Not significant	Not significant
group_20762	Mobilization protein;Toxin-antitoxin system antitoxin component ribbon-helix-helix domain protein	3	7	52	38	0.108487	0.342222	-1.54699	0.0545455	0.155556	-0.10101	0.440452	Not significant	Not significant
group_20797	fluoride efflux transporter CrcB	3	7	52	38	0.108487	0.342222	-1.54699	0.0545455	0.155556	-0.10101	0.440452	Not significant	Not significant
group_20808	Integrative and conjugative element protein	3	7	52	38	0.108487	0.342222	-1.54699	0.0545455	0.155556	-0.10101	0.440452	Not significant	Not significant
group_20840	UDP-glucose 4-epimerase GalE;UDP-glucose 4-epimerase	3	7	52	38	0.108487	0.342222	-1.54699	0.0545455	0.155556	-0.10101	0.440452	Not significant	Not significant
group_2089	ABC superfamily ATP binding cassette transporter ABC protein	3	7	52	38	0.108487	0.342222	-1.54699	0.0545455	0.155556	-0.10101	0.440452	Not significant	Not significant
group_2090	ATP-binding cassette transporter-like protein;ABC transporter permease	3	7	52	38	0.108487	0.342222	-1.54699	0.0545455	0.155556	-0.10101	0.440452	Not significant	Not significant
group_21013	Arc-like DNA binding domain-containing protein	3	7	52	38	0.108487	0.342222	-1.54699	0.0545455	0.155556	-0.10101	0.440452	Not significant	Not significant
group_21041	DNA-entry nuclease	3	7	52	38	0.108487	0.342222	-1.54699	0.0545455	0.155556	-0.10101	0.440452	Not significant	Not significant
group_21265	Phosphorylated carbohydrates phosphatase;HAD-superfamily hydrolase	3	7	52	38	0.108487	0.342222	-1.54699	0.0545455	0.155556	-0.10101	0.440452	Not significant	Not significant
group_21355	CopY/TcrY family copper transport repressor	3	7	52	38	0.108487	0.342222	-1.54699	0.0545455	0.155556	-0.10101	0.440452	Not significant	Not significant
group_21406	Copper-translocating P-type ATPase putative;Lead cadmium zinc and mercury transporting ATPase	3	7	52	38	0.108487	0.342222	-1.54699	0.0545455	0.155556	-0.10101	0.440452	Not significant	Not significant
group_21438	Heavy metal-associated domain protein;Copper chaperone;Copper chaperone putative;HMA domain-containing protein	3	7	52	38	0.108487	0.342222	-1.54699	0.0545455	0.155556	-0.10101	0.440452	Not significant	Not significant
group_21512	PAP2 family protein;Phosphatidylglycerophosphatase B	3	7	52	38	0.108487	0.342222	-1.54699	0.0545455	0.155556	-0.10101	0.440452	Not significant	Not significant
group_21514	Aminodeoxychorismate/anthranilate synthase component 2	3	7	52	38	0.108487	0.342222	-1.54699	0.0545455	0.155556	-0.10101	0.440452	Not significant	Not significant
group_21697	formimidoylglutamase	3	7	52	38	0.108487	0.342222	-1.54699	0.0545455	0.155556	-0.10101	0.440452	Not significant	Not significant
group_21698	Transcriptional regulator LuxR family;Bacterial transcriptional activator domain-containing protein	3	7	52	38	0.108487	0.342222	-1.54699	0.0545455	0.155556	-0.10101	0.440452	Not significant	Not significant
group_21752	TIGR02206 family protein;Pr6Pr family membrane protein	3	7	52	38	0.108487	0.342222	-1.54699	0.0545455	0.155556	-0.10101	0.440452	Not significant	Not significant
group_21768	HTH cro/C1-type domain-containing protein	3	7	52	38	0.108487	0.342222	-1.54699	0.0545455	0.155556	-0.10101	0.440452	Not significant	Not significant
group_222	hypothetical protein	3	7	52	38	0.108487	0.342222	-1.54699	0.0545455	0.155556	-0.10101	0.440452	Not significant	Not significant
group_2285	aminodeoxychorismate synthase component I	3	7	52	38	0.108487	0.342222	-1.54699	0.0545455	0.155556	-0.10101	0.440452	Not significant	Not significant
group_2310	N-acetyltransferase domain-containing protein;Ribosomal-protein-alanine acetyltransferase	3	7	52	38	0.108487	0.342222	-1.54699	0.0545455	0.155556	-0.10101	0.440452	Not significant	Not significant
group_2378	Nudix hydrolase domain-containing protein;NUDIX hydrolase;MutT/NUDIX family protein;MutT/nudix family protein;Nucleoside triphosphate pyrophosphohydrolase;78-dihydro-8-oxoguanine-triphosphatase	3	7	52	38	0.108487	0.342222	-1.54699	0.0545455	0.155556	-0.10101	0.440452	Not significant	Not significant
group_253	ABC transporter ATP-binding protein;ABC transporter ATP binding protein;ABC transporter domain-containing protein	3	7	52	38	0.108487	0.342222	-1.54699	0.0545455	0.155556	-0.10101	0.440452	Not significant	Not significant
group_2793	Histidinol-phosphatase	3	7	52	38	0.108487	0.342222	-1.54699	0.0545455	0.155556	-0.10101	0.440452	Not significant	Not significant
group_3006	homoserine kinase	3	7	52	38	0.108487	0.342222	-1.54699	0.0545455	0.155556	-0.10101	0.440452	Not significant	Not significant
group_3019	Transposase;IS3 family transposase ORF A;DNA-binding protein;Mobile element protein	3	7	52	38	0.108487	0.342222	-1.54699	0.0545455	0.155556	-0.10101	0.440452	Not significant	Not significant
group_419	DUF4105 domain-containing protein	3	7	52	38	0.108487	0.342222	-1.54699	0.0545455	0.155556	-0.10101	0.440452	Not significant	Not significant
group_4996	redox-regulated ATPase YchF	3	7	52	38	0.108487	0.342222	-1.54699	0.0545455	0.155556	-0.10101	0.440452	Not significant	Not significant
group_513	TIGR01906 family membrane protein	3	7	52	38	0.108487	0.342222	-1.54699	0.0545455	0.155556	-0.10101	0.440452	Not significant	Not significant
group_649	DUF2975 domain-containing protein	3	7	52	38	0.108487	0.342222	-1.54699	0.0545455	0.155556	-0.10101	0.440452	Not significant	Not significant
group_854	FMN-dependent NADH-azoreductase 1	3	7	52	38	0.108487	0.342222	-1.54699	0.0545455	0.155556	-0.10101	0.440452	Not significant	Not significant
group_895	Calcineurin-like phosphoesterase domain-containing protein	3	7	52	38	0.108487	0.342222	-1.54699	0.0545455	0.155556	-0.10101	0.440452	Not significant	Not significant
group_949	HTH tetR-type domain-containing protein	3	7	52	38	0.108487	0.342222	-1.54699	0.0545455	0.155556	-0.10101	0.440452	Not significant	Not significant
hpt	hypoxanthine phosphoribosyltransferase	3	7	52	38	0.108487	0.342222	-1.54699	0.0545455	0.155556	-0.10101	0.440452	Not significant	Not significant
hrtB	putative hemin ABC transporter permease HrtB;Permease domain protein	3	7	52	38	0.108487	0.342222	-1.54699	0.0545455	0.155556	-0.10101	0.440452	Not significant	Not significant
hutD	HutD;HutD family protein	3	7	52	38	0.108487	0.342222	-1.54699	0.0545455	0.155556	-0.10101	0.440452	Not significant	Not significant
lytR	Sensory transduction protein LytR;LytTr family transcriptional regulator	3	7	52	38	0.108487	0.342222	-1.54699	0.0545455	0.155556	-0.10101	0.440452	Not significant	Not significant
nrdG	anaerobic ribonucleoside-triphosphate reductase activating protein	3	7	52	38	0.108487	0.342222	-1.54699	0.0545455	0.155556	-0.10101	0.440452	Not significant	Not significant
perR	Peroxide stress regulator PerR FUR family;Fur family transcriptional regulator;Transcriptional regulator Fur family;peroxide-responsive transcriptional repressor PerR	3	7	52	38	0.108487	0.342222	-1.54699	0.0545455	0.155556	-0.10101	0.440452	Not significant	Not significant
rimI	ribosomal protein S18-alanine N-acetyltransferase	3	7	52	38	0.108487	0.342222	-1.54699	0.0545455	0.155556	-0.10101	0.440452	Not significant	Not significant
rinA	Bacteriophage transcriptional activator;Phage transcriptional regulator RinA family	3	7	52	38	0.108487	0.342222	-1.54699	0.0545455	0.155556	-0.10101	0.440452	Not significant	Not significant
serB	phosphoserine phosphatase SerB	3	7	52	38	0.108487	0.342222	-1.54699	0.0545455	0.155556	-0.10101	0.440452	Not significant	Not significant
ygaZ~~~azlC	Inner membrane protein YgaZ;Putative azaleucine resistance protein AzlC;Branched-chain amino acid transport protein azlC	3	7	52	38	0.108487	0.342222	-1.54699	0.0545455	0.155556	-0.10101	0.440452	Not significant	Not significant
xerC	Tyrosine-type recombinase/integrase;site-specific integrase;Site-specific recombinase XerC;Phage integrase family recombinase;hypothetical protein;Site-specific recombinase phage integrase family;Tyrosine recombinase XerC;Tyr recombinase domain-containing protein;Integrase;tyrosine-type recombinase/integrase;Tyrosine integrase;Putative integrase/recombinase;Site-specific integrase;Site-specific r…	30	17	25	28	0.110224	1.9479	0.961919	0.545455	0.377778	0.167677	0.440452	Not significant	Not significant
sstT	serine/threonine transporter SstT;Membrane transport protein;Serine/threonine transporter SstT	37	37	18	8	0.11117	0.459459	-1.12199	0.672727	0.822222	-0.149495	0.440452	Not significant	Not significant
glnH	Amino acid ABC superfamily ATP binding cassette transporter binding protein;ABC transporter glutamine-binding protein GlnH;hypothetical protein;ABC transporter substrate binding lipoprotein-amino acid transport	11	16	44	29	0.112886	0.462036	-1.11392	0.2	0.355556	-0.155556	0.440452	Not significant	Not significant
glnQ	Glutamate ABC superfamily ATP binding cassette transporter ABC protein;ABC-type polar amino acid transport system ATPase component	11	16	44	29	0.112886	0.462036	-1.11392	0.2	0.355556	-0.155556	0.440452	Not significant	Not significant
group_1111	Amino acid permease;ABC-type amino acid transport system permease component;hypothetical protein	11	16	44	29	0.112886	0.462036	-1.11392	0.2	0.355556	-0.155556	0.440452	Not significant	Not significant
group_2345	Multidrug ABC transporter ATPase/permease;ABC transporter transmembrane region;Putative ABC-type multidrug transport system protein	11	16	44	29	0.112886	0.462036	-1.11392	0.2	0.355556	-0.155556	0.440452	Not significant	Not significant
group_3093	Integral membrane protein;MtN3/saliva family protein	11	16	44	29	0.112886	0.462036	-1.11392	0.2	0.355556	-0.155556	0.440452	Not significant	Not significant
hisM	Amino acid ABC transporter permease;ABC-type amino acid transport system permease component	11	16	44	29	0.112886	0.462036	-1.11392	0.2	0.355556	-0.155556	0.440452	Not significant	Not significant
saeR	DNA-binding response regulator;Two-component response transcriptional regulator;Response regulator SaeR;hypothetical protein	24	27	31	18	0.113069	0.523232	-0.934476	0.436364	0.6	-0.163636	0.440452	Not significant	Not significant
walK	histidine kinase;hypothetical protein;Sensor histidine kinase WalK	24	27	31	18	0.113069	0.523232	-0.934476	0.436364	0.6	-0.163636	0.440452	Not significant	Not significant
rgfB~~~elsH	Endonuclease/exonuclease/phosphatase family protein RgfB;Hydrolase;Metal-dependent hydrolase endonuclease/exonuclease/phosphatase family;Maltose 6'-phosphate phosphatase;Endonuclease/exonuclease/phosphatase domain-containing protein	43	28	12	17	0.120304	2.13684	1.09548	0.781818	0.622222	0.159596	0.440452	Not significant	Not significant
group_1509	TfoX N-terminal domain-containing protein;TfoX N-terminal domain protein;TfoX N-domain family protein	19	9	36	36	0.122315	2.05263	1.03747	0.345455	0.2	0.145455	0.440452	Not significant	Not significant
group_20310	N-acetyltransferase domain-containing protein;GNAT family N-acetyltransferase;Acetyltransferase;Acetyltransferase GNAT family;GNAT family acetyltransferase	19	9	36	36	0.122315	2.05263	1.03747	0.345455	0.2	0.145455	0.440452	Not significant	Not significant
group_1100	tagatose-bisphosphate aldolase;Tagatose 16-diphosphate aldolase	7	12	48	33	0.122848	0.414433	-1.27079	0.127273	0.266667	-0.139394	0.440452	Not significant	Not significant
group_1471	SIALI-17 repeat-containing surface protein;Sialidase A;hypothetical protein	7	12	48	33	0.122848	0.414433	-1.27079	0.127273	0.266667	-0.139394	0.440452	Not significant	Not significant
group_1522	Phosphoglycerate mutase;Histidine phosphatase superfamily (Branch 1) domain protein;Phosphoglycerate mutase family protein;Histidine phosphatase family protein	7	12	48	33	0.122848	0.414433	-1.27079	0.127273	0.266667	-0.139394	0.440452	Not significant	Not significant
group_18153	Damage-inducible protein CinA;hypothetical protein;Competence-induced protein Ccs4	7	12	48	33	0.122848	0.414433	-1.27079	0.127273	0.266667	-0.139394	0.440452	Not significant	Not significant
group_19394	Competence protein	7	12	48	33	0.122848	0.414433	-1.27079	0.127273	0.266667	-0.139394	0.440452	Not significant	Not significant
group_1940	Acyl-CoA dehydrogenase;hypothetical protein;Dehydrogenase;Acyl-CoA dehydrogenase/oxidase N-terminal domain-containing protein	7	12	48	33	0.122848	0.414433	-1.27079	0.127273	0.266667	-0.139394	0.440452	Not significant	Not significant
group_2804	glycosyltransferase;Glycosyltransferase Gtf1;Glycosyl transferase family 1 domain-containing protein;hypothetical protein	7	12	48	33	0.122848	0.414433	-1.27079	0.127273	0.266667	-0.139394	0.440452	Not significant	Not significant
group_3085	Oxidoreductase;15-anhydro-D-fructose reductase	7	12	48	33	0.122848	0.414433	-1.27079	0.127273	0.266667	-0.139394	0.440452	Not significant	Not significant
group_3089	DUF1275 domain-containing protein;Integral membrane protein	7	12	48	33	0.122848	0.414433	-1.27079	0.127273	0.266667	-0.139394	0.440452	Not significant	Not significant
group_3105	nucleoside-triphosphate diphosphatase	7	12	48	33	0.122848	0.414433	-1.27079	0.127273	0.266667	-0.139394	0.440452	Not significant	Not significant
group_3110	site-specific tyrosine recombinase XerD	7	12	48	33	0.122848	0.414433	-1.27079	0.127273	0.266667	-0.139394	0.440452	Not significant	Not significant
aliA~~~sarA~~~oppA	Solute-binding protein family 5 domain-containing protein;Oligopeptide ABC superfamily ATP binding cassette transporter binding protein;AliA;hypothetical protein;Oligopeptide-binding protein SarA;Oligopeptide ABC transporter periplasmic oligopeptide-binding protein OppA;Oligopeptide ABC transporter oligopeptide-binding protein AliA;Oligopeptide-binding protein AliA;Peptide ABC transporter ATP-bin…	42	40	13	5	0.1232	0.427526	-1.22591	0.763636	0.888889	-0.125253	0.440452	Not significant	Not significant
group_20624	elongation factor G	42	40	13	5	0.1232	0.427526	-1.22591	0.763636	0.888889	-0.125253	0.440452	Not significant	Not significant
group_2138	5-methyltetrahydropteroyltriglutamate--homocysteine S-methyltransferase;5-methyltetrahydropteroyltriglutamate--homocysteine methyltransferase;5-methyltetrahydropteroyltriglutamate/homocysteine S-methyltransferase	42	40	13	5	0.1232	0.427526	-1.22591	0.763636	0.888889	-0.125253	0.440452	Not significant	Not significant
group_3066	Lactoylglutathione lyase;Putative lactoylglutathione lyase;Catechol 23-dioxygenase or related enzyme vicinal oxygen chelate (VOC) family	42	40	13	5	0.1232	0.427526	-1.22591	0.763636	0.888889	-0.125253	0.440452	Not significant	Not significant
pyrG	CTP synthase;CTP synthase (glutamine hydrolyzing)	42	40	13	5	0.1232	0.427526	-1.22591	0.763636	0.888889	-0.125253	0.440452	Not significant	Not significant
lacI~~~galR	Transcriptional regulator LacI family;Galctose operon repressor protein;HTH-type transcriptional regulator GalR	13	5	42	40	0.1232	2.33904	1.22591	0.236364	0.111111	0.125253	0.440452	Not significant	Not significant
dapA	4-hydroxy-tetrahydrodipicolinate synthase;Dihydrodipicolinate synthase;dihydrodipicolinate synthase family protein;hypothetical protein	49	44	6	1	0.124992	0.256698	-1.96185	0.890909	0.977778	-0.0868687	0.440452	Not significant	Not significant
epsH	Glycosyltransferase group 2 family protein;Glycosyltransferase family 2 protein;Putative glycosyltransferase EpsH	6	1	49	44	0.124992	3.89562	1.96185	0.109091	0.0222222	0.0868687	0.440452	Not significant	Not significant
group_1148	DUF6287 domain-containing protein	6	1	49	44	0.124992	3.89562	1.96185	0.109091	0.0222222	0.0868687	0.440452	Not significant	Not significant
group_14753	SP_0009 family protein	6	1	49	44	0.124992	3.89562	1.96185	0.109091	0.0222222	0.0868687	0.440452	Not significant	Not significant
group_15054	Chlorohydrolase	6	1	49	44	0.124992	3.89562	1.96185	0.109091	0.0222222	0.0868687	0.440452	Not significant	Not significant
group_16179	hypothetical protein;bifunctional glutamate--cysteine ligase GshA/glutathione synthetase GshB	6	1	49	44	0.124992	3.89562	1.96185	0.109091	0.0222222	0.0868687	0.440452	Not significant	Not significant
group_16416	hypothetical protein	6	1	49	44	0.124992	3.89562	1.96185	0.109091	0.0222222	0.0868687	0.440452	Not significant	Not significant
group_16463	DUF1307 domain-containing protein;Lipoprotein	6	1	49	44	0.124992	3.89562	1.96185	0.109091	0.0222222	0.0868687	0.440452	Not significant	Not significant
group_16525	hypothetical protein	6	1	49	44	0.124992	3.89562	1.96185	0.109091	0.0222222	0.0868687	0.440452	Not significant	Not significant
group_1671	hypothetical protein;Phage protein	6	1	49	44	0.124992	3.89562	1.96185	0.109091	0.0222222	0.0868687	0.440452	Not significant	Not significant
group_17198	ABC-type glycerol-3-phosphate transport system periplasmic component	6	1	49	44	0.124992	3.89562	1.96185	0.109091	0.0222222	0.0868687	0.440452	Not significant	Not significant
group_17251	sucrose phosphorylase	6	1	49	44	0.124992	3.89562	1.96185	0.109091	0.0222222	0.0868687	0.440452	Not significant	Not significant
group_1766	Adhesin;Cna B-type domain-containing protein;Gram-positive cocci surface proteins LPxTG domain-containing protein;LPXTG-domain-containing protein	6	1	49	44	0.124992	3.89562	1.96185	0.109091	0.0222222	0.0868687	0.440452	Not significant	Not significant
group_17961	Integrase;hypothetical protein	6	1	49	44	0.124992	3.89562	1.96185	0.109091	0.0222222	0.0868687	0.440452	Not significant	Not significant
group_18696	LPXTG cell wall anchor domain-containing protein;Streptococcal pilin isopeptide linkage domain-containing protein	6	1	49	44	0.124992	3.89562	1.96185	0.109091	0.0222222	0.0868687	0.440452	Not significant	Not significant
group_18831	Alpha-galactosidase	6	1	49	44	0.124992	3.89562	1.96185	0.109091	0.0222222	0.0868687	0.440452	Not significant	Not significant
group_19185	Cna protein B-type domain protein;Alcohol dehydrogenase;Collagen adhesin	6	1	49	44	0.124992	3.89562	1.96185	0.109091	0.0222222	0.0868687	0.440452	Not significant	Not significant
group_1937	Peptide deformylase;hypothetical protein	6	1	49	44	0.124992	3.89562	1.96185	0.109091	0.0222222	0.0868687	0.440452	Not significant	Not significant
group_19807	HTH araC/xylS-type domain-containing protein	6	1	49	44	0.124992	3.89562	1.96185	0.109091	0.0222222	0.0868687	0.440452	Not significant	Not significant
group_19860	Peptidoglycan-binding domain-containingproteinputative;VWA domain-containing protein;vWA domain-containing protein;LPXTG cell wall anchor domain-containing protein;Peptidoglycan-binding protein	6	1	49	44	0.124992	3.89562	1.96185	0.109091	0.0222222	0.0868687	0.440452	Not significant	Not significant
group_20025	Demethylmenaquinone methyltransferase	6	1	49	44	0.124992	3.89562	1.96185	0.109091	0.0222222	0.0868687	0.440452	Not significant	Not significant
group_2898	Chloramphenicol acetyltransferase;Transferase hexapeptide repeat containing protein	6	1	49	44	0.124992	3.89562	1.96185	0.109091	0.0222222	0.0868687	0.440452	Not significant	Not significant
group_2913	Glycosyl transferase;Glycosyltransferase family 8;Glycosyltransferase	6	1	49	44	0.124992	3.89562	1.96185	0.109091	0.0222222	0.0868687	0.440452	Not significant	Not significant
group_2976	Exopolysaccharide biosynthesis protein;Exopolysaccharide biosynthesis protein acetyltransferase	6	1	49	44	0.124992	3.89562	1.96185	0.109091	0.0222222	0.0868687	0.440452	Not significant	Not significant
group_491	Ig-like domain-containing protein;LPXTG cell wall anchor domain-containing protein;Wall-associated protein;Gram-positive cocci surface proteins LPxTG domain-containing protein;hypothetical protein	6	1	49	44	0.124992	3.89562	1.96185	0.109091	0.0222222	0.0868687	0.440452	Not significant	Not significant
group_5572	DNA-binding transcriptional regulator LsrR DeoR family	6	1	49	44	0.124992	3.89562	1.96185	0.109091	0.0222222	0.0868687	0.440452	Not significant	Not significant
group_6337	ABC-type sugar transport system permease component	6	1	49	44	0.124992	3.89562	1.96185	0.109091	0.0222222	0.0868687	0.440452	Not significant	Not significant
group_6606	ABC-type glycerol-3-phosphate transport system permease component	6	1	49	44	0.124992	3.89562	1.96185	0.109091	0.0222222	0.0868687	0.440452	Not significant	Not significant
ybbD	Putative lipoprotein YbbD;hypothetical protein	6	1	49	44	0.124992	3.89562	1.96185	0.109091	0.0222222	0.0868687	0.440452	Not significant	Not significant
group_1569	alpha/beta hydrolase;Alpha/beta hydrolase;Hydrolase;Alpha/beta hydrolase family protein;Hydrolase alpha/beta domain protein;AB hydrolase-1 domain-containing protein;Alpha/beta hydrolase fold family protein	21	10	34	35	0.127629	2.10697	1.07517	0.381818	0.222222	0.159596	0.440452	Not significant	Not significant
padR	Transcriptional regulator PadR family;Transcription regulator PadR N-terminal domain-containing protein;DNA-binding transcriptional regulator PadR family	21	10	34	35	0.127629	2.10697	1.07517	0.381818	0.222222	0.159596	0.440452	Not significant	Not significant
group_15633	PTS system lactose-specific EIIA component;PTS lactose transporter subunit IIA	4	8	51	37	0.130298	0.385494	-1.37522	0.0727273	0.177778	-0.105051	0.440452	Not significant	Not significant
group_16349	hypothetical protein	4	8	51	37	0.130298	0.385494	-1.37522	0.0727273	0.177778	-0.105051	0.440452	Not significant	Not significant
group_16589	Phosphoribosylaminoimidazolecarboxamide formyltransferase	4	8	51	37	0.130298	0.385494	-1.37522	0.0727273	0.177778	-0.105051	0.440452	Not significant	Not significant
group_16668	PRD domain-containing protein	4	8	51	37	0.130298	0.385494	-1.37522	0.0727273	0.177778	-0.105051	0.440452	Not significant	Not significant
group_1715	Putative NrdI-like protein	4	8	51	37	0.130298	0.385494	-1.37522	0.0727273	0.177778	-0.105051	0.440452	Not significant	Not significant
group_17649	Deoxyribonuclease;hypothetical protein	4	8	51	37	0.130298	0.385494	-1.37522	0.0727273	0.177778	-0.105051	0.440452	Not significant	Not significant
group_18038	ABC3 transporter permease protein domain-containing protein	4	8	51	37	0.130298	0.385494	-1.37522	0.0727273	0.177778	-0.105051	0.440452	Not significant	Not significant
group_18704	Signal transduction histidine kinase;hypothetical protein;histidine kinase	4	8	51	37	0.130298	0.385494	-1.37522	0.0727273	0.177778	-0.105051	0.440452	Not significant	Not significant
group_1910	Putative ABC transporter ATP-binding protein;ABC transporter ATP-binding protein	4	8	51	37	0.130298	0.385494	-1.37522	0.0727273	0.177778	-0.105051	0.440452	Not significant	Not significant
group_19312	ABC transporter ATP-binding protein	4	8	51	37	0.130298	0.385494	-1.37522	0.0727273	0.177778	-0.105051	0.440452	Not significant	Not significant
group_19602	Cardiolipin synthase N-terminal domain-containing protein	4	8	51	37	0.130298	0.385494	-1.37522	0.0727273	0.177778	-0.105051	0.440452	Not significant	Not significant
group_19918	NodB-like y domain-containing protein;Peptidoglycan N-acetylglucosamine deacetylase A	4	8	51	37	0.130298	0.385494	-1.37522	0.0727273	0.177778	-0.105051	0.440452	Not significant	Not significant
group_20150	Periplasmic binding protein domain-containing protein;HTH lacI-type domain-containing protein;LacI family transcriptional regulator;Catabolite control protein B	4	8	51	37	0.130298	0.385494	-1.37522	0.0727273	0.177778	-0.105051	0.440452	Not significant	Not significant
group_20296	Integrative and conjugative element protein	4	8	51	37	0.130298	0.385494	-1.37522	0.0727273	0.177778	-0.105051	0.440452	Not significant	Not significant
group_2777	type I restriction-modification system subunit M N-terminal domain-containing protein;type I restriction-modification system subunit M;site-specific DNA-methyltransferase (adenine-specific);Type I restriction-modification system DNA-methyltransferase subunit M	4	8	51	37	0.130298	0.385494	-1.37522	0.0727273	0.177778	-0.105051	0.440452	Not significant	Not significant
group_3358	PTS system lactose-specific EIICB component	4	8	51	37	0.130298	0.385494	-1.37522	0.0727273	0.177778	-0.105051	0.440452	Not significant	Not significant
group_3836	6-phospho-beta-galactosidase	4	8	51	37	0.130298	0.385494	-1.37522	0.0727273	0.177778	-0.105051	0.440452	Not significant	Not significant
group_834	site-specific DNA-methyltransferase (adenine-specific);Type I restriction-modification system DNA methylase subunit;hypothetical protein	4	8	51	37	0.130298	0.385494	-1.37522	0.0727273	0.177778	-0.105051	0.440452	Not significant	Not significant
group_8475	Acyl-CoA thioester hydrolase	4	8	51	37	0.130298	0.385494	-1.37522	0.0727273	0.177778	-0.105051	0.440452	Not significant	Not significant
regX3	Sensory transduction protein regX3;Two component transcriptional regulator winged helix family;hypothetical protein	4	8	51	37	0.130298	0.385494	-1.37522	0.0727273	0.177778	-0.105051	0.440452	Not significant	Not significant
udp	Nucleoside phosphorylase domain-containing protein;Phosphorylase Pnp;Purine nucleoside phosphorylase DeoD-type;Uridine phosphorylase;Phosphorylase family protein;nucleoside phosphorylase	42	28	13	17	0.132902	1.93307	0.950896	0.763636	0.622222	0.141414	0.440452	Not significant	Not significant
nudI	NTP pyrophosphohydrolases including oxidative damage repair enzymes;Nucleoside triphosphatase NudI;NTP pyrophosphohydrolases including oxidative damage repair enzymes putative;Nudix hydrolase domain-containing protein;NTP pyrophosphohydrolase including oxidative damage repair enzymes;Hydrolase NUDIX family	13	17	42	28	0.132902	0.517311	-0.950896	0.236364	0.377778	-0.141414	0.440452	Not significant	Not significant
acuB~~~cBS	CBS domain-containing protein;Putative acetoin utilization protein AcuB;Acetoin utilization CBS domain-containing protein;Acetoin utilization CBS domain-containing protein / Inosine-5'-monophosphate dehydrogenase;CBS domain;hypothetical protein	45	42	10	3	0.134637	0.356863	-1.48656	0.818182	0.933333	-0.115152	0.440452	Not significant	Not significant
ant6	Aminoglycoside 6-adenylyltransferase;Putative aminoglycoside adenylyltransferase;Streptomycin adenylyltransferase;aminoglycoside 6-adenylyltransferase;Aminoglycoside adenylyltransferase;Streptomycin adenylyltransferase family protein	45	42	10	3	0.134637	0.356863	-1.48656	0.818182	0.933333	-0.115152	0.440452	Not significant	Not significant
group_739	DUF1858 domain-containing protein	45	42	10	3	0.134637	0.356863	-1.48656	0.818182	0.933333	-0.115152	0.440452	Not significant	Not significant
livG	Branched-chain amino acid ABC superfamily ATP binding cassette transporter ABC protein;ABC-type branched-chain amino acid transport system ATPase component LivG;Branched-chain amino acid transport ATP-binding protein LivG;ATP-binding cassette domain-containing protein	45	42	10	3	0.134637	0.356863	-1.48656	0.818182	0.933333	-0.115152	0.440452	Not significant	Not significant
nth	endonuclease III;Endonuclease III	45	42	10	3	0.134637	0.356863	-1.48656	0.818182	0.933333	-0.115152	0.440452	Not significant	Not significant
pbuO~~~nCS2	Xanthine/uracil/vitamin C permease;NCS2 family nucleobase:cation symporter-2;NCS2 family permease;Xanthine uracil vitamin C permease;Guanine permease;Guanine/hypoxanthine permease PbuO;Xanthine/guanine/uracil/vitamin C permease GhxP/GhxQ nucleobase:cation symporter 2 ( NCS2) family	45	42	10	3	0.134637	0.356863	-1.48656	0.818182	0.933333	-0.115152	0.440452	Not significant	Not significant
radC	DNA repair protein RadC;UPF0758 protein SpyM3_0777	45	42	10	3	0.134637	0.356863	-1.48656	0.818182	0.933333	-0.115152	0.440452	Not significant	Not significant
recO	DNA repair protein RecO	45	42	10	3	0.134637	0.356863	-1.48656	0.818182	0.933333	-0.115152	0.440452	Not significant	Not significant
tACO1	YebC/PmpR family DNA-binding transcriptional regulator	45	42	10	3	0.134637	0.356863	-1.48656	0.818182	0.933333	-0.115152	0.440452	Not significant	Not significant
truA	tRNA pseudouridine(38-40) synthase TruA	45	42	10	3	0.134637	0.356863	-1.48656	0.818182	0.933333	-0.115152	0.440452	Not significant	Not significant
tsaE	tRNA (adenosine(37)-N6)-threonylcarbamoyltransferase complex ATPase subunit type 1 TsaE;tRNA threonylcarbamoyladenosine biosynthesis protein TsaE	45	42	10	3	0.134637	0.356863	-1.48656	0.818182	0.933333	-0.115152	0.440452	Not significant	Not significant
yigL~~~cof	Cof family protein;Cof-like hydrolase;Cof-type HAD-IIB family hydrolase;Pyridoxal phosphate phosphatase YigL;HAD family hydrolase;Hydroxymethylpyrimidine pyrophosphatase and other HAD family phosphatases	45	42	10	3	0.134637	0.356863	-1.48656	0.818182	0.933333	-0.115152	0.440452	Not significant	Not significant
group_1342	hypothetical protein;Lysozyme;CHAP domain-containing protein;GBS Bsp-like repeat-containing protein;GBS Bsp-like repeat protein;N-acetylmuramidase;N-acetylmuramoyl-L-alanine amidase;Peptidase C51 domain-containing protein;N-acetylmuramidase/lysin	10	3	45	42	0.134637	2.8022	1.48656	0.181818	0.0666667	0.115152	0.440452	Not significant	Not significant
group_19493	Acetyltransferase;N-acetyltransferase domain-containing protein;GNAT family N-acetyltransferase	10	3	45	42	0.134637	2.8022	1.48656	0.181818	0.0666667	0.115152	0.440452	Not significant	Not significant
group_20447	hypothetical protein	10	3	45	42	0.134637	2.8022	1.48656	0.181818	0.0666667	0.115152	0.440452	Not significant	Not significant
group_20647	hypothetical protein;Lipoprotein	10	3	45	42	0.134637	2.8022	1.48656	0.181818	0.0666667	0.115152	0.440452	Not significant	Not significant
group_21393	IgA FC receptor;Immunoglobulin A1 protease;hypothetical protein;DUF6574 domain-containing protein	10	3	45	42	0.134637	2.8022	1.48656	0.181818	0.0666667	0.115152	0.440452	Not significant	Not significant
group_2968	histidine kinase;ABC transmembrane type-1 domain-containing protein	10	3	45	42	0.134637	2.8022	1.48656	0.181818	0.0666667	0.115152	0.440452	Not significant	Not significant
group_2986	ABC-2 family transporter protein;ABC-2 type transporter domain-containing protein;ABC-2 type transporter	10	3	45	42	0.134637	2.8022	1.48656	0.181818	0.0666667	0.115152	0.440452	Not significant	Not significant
group_2991	ABC-2 family transporter protein;ABC transporter permease	10	3	45	42	0.134637	2.8022	1.48656	0.181818	0.0666667	0.115152	0.440452	Not significant	Not significant
group_2994	ABC transporter domain-containing protein	10	3	45	42	0.134637	2.8022	1.48656	0.181818	0.0666667	0.115152	0.440452	Not significant	Not significant
nisR	Nisin biosynthesis regulatory protein nisR;Nisin biosynthesis regulatory protein NisR	10	3	45	42	0.134637	2.8022	1.48656	0.181818	0.0666667	0.115152	0.440452	Not significant	Not significant
proC	pyrroline-5-carboxylate reductase;Pyrroline-5-carboxylate reductase	10	3	45	42	0.134637	2.8022	1.48656	0.181818	0.0666667	0.115152	0.440452	Not significant	Not significant
asp4	Accessory secretory protein Asp4	2	6	53	39	0.135184	0.283968	-1.8162	0.0363636	0.133333	-0.0969697	0.440452	Not significant	Not significant
cotH	CotH protein;CotH kinase family protein;Spore coat assembly protein	2	6	53	39	0.135184	0.283968	-1.8162	0.0363636	0.133333	-0.0969697	0.440452	Not significant	Not significant
dpnD	DpnD/PcfM-like protein;DpnD protein	2	6	53	39	0.135184	0.283968	-1.8162	0.0363636	0.133333	-0.0969697	0.440452	Not significant	Not significant
gly	putative glycosyl transferase Gly;Glycosyltransferase;SP_1767 family glycosyltransferase	2	6	53	39	0.135184	0.283968	-1.8162	0.0363636	0.133333	-0.0969697	0.440452	Not significant	Not significant
group_100	HTH deoR-type domain-containing protein;Transcriptional regulator	2	6	53	39	0.135184	0.283968	-1.8162	0.0363636	0.133333	-0.0969697	0.440452	Not significant	Not significant
group_1063	Cardiolipin synthase N-terminal domain-containing protein;LPXTG cell wall anchor domain-containing protein	2	6	53	39	0.135184	0.283968	-1.8162	0.0363636	0.133333	-0.0969697	0.440452	Not significant	Not significant
group_1167	Modification methylase Sau96I	2	6	53	39	0.135184	0.283968	-1.8162	0.0363636	0.133333	-0.0969697	0.440452	Not significant	Not significant
group_1187	RggD putative;HTH cro/C1-type domain-containing protein	2	6	53	39	0.135184	0.283968	-1.8162	0.0363636	0.133333	-0.0969697	0.440452	Not significant	Not significant
group_1202	Zinc metalloprotease zmpB;SIALI-17 repeat-containing surface protein	2	6	53	39	0.135184	0.283968	-1.8162	0.0363636	0.133333	-0.0969697	0.440452	Not significant	Not significant
group_1234	Fructan beta-fructosidase putative	2	6	53	39	0.135184	0.283968	-1.8162	0.0363636	0.133333	-0.0969697	0.440452	Not significant	Not significant
group_1265	DUF4956 domain-containing protein;Mg(2+) transport ATPase	2	6	53	39	0.135184	0.283968	-1.8162	0.0363636	0.133333	-0.0969697	0.440452	Not significant	Not significant
group_1327	ABC-2 type transporter transmembrane domain-containing protein	2	6	53	39	0.135184	0.283968	-1.8162	0.0363636	0.133333	-0.0969697	0.440452	Not significant	Not significant
group_13329	Bovicin 255 variant	2	6	53	39	0.135184	0.283968	-1.8162	0.0363636	0.133333	-0.0969697	0.440452	Not significant	Not significant
group_1357	C5a peptidase	2	6	53	39	0.135184	0.283968	-1.8162	0.0363636	0.133333	-0.0969697	0.440452	Not significant	Not significant
group_1401	Putative stress-responsive transcriptional regulator PspC;Phage shock protein PspC N-terminal domain-containing protein;DNA-binding transcriptional activator PspC	2	6	53	39	0.135184	0.283968	-1.8162	0.0363636	0.133333	-0.0969697	0.440452	Not significant	Not significant
group_1423	dextransucrase;hypothetical protein	2	6	53	39	0.135184	0.283968	-1.8162	0.0363636	0.133333	-0.0969697	0.440452	Not significant	Not significant
group_1507	VTC protein;VTC domain-containing protein	2	6	53	39	0.135184	0.283968	-1.8162	0.0363636	0.133333	-0.0969697	0.440452	Not significant	Not significant
group_1542	ABC transporter ATP-binding protein	2	6	53	39	0.135184	0.283968	-1.8162	0.0363636	0.133333	-0.0969697	0.440452	Not significant	Not significant
group_1602	DUF1648 domain-containing protein	2	6	53	39	0.135184	0.283968	-1.8162	0.0363636	0.133333	-0.0969697	0.440452	Not significant	Not significant
group_16063	Bacteriocin immunity protein	2	6	53	39	0.135184	0.283968	-1.8162	0.0363636	0.133333	-0.0969697	0.440452	Not significant	Not significant
group_162	Demethylrebeccamycin-D-glucose O-methyltransferase;Demethylmenaquinone methyltransferase	2	6	53	39	0.135184	0.283968	-1.8162	0.0363636	0.133333	-0.0969697	0.440452	Not significant	Not significant
group_1623	Transcriptional regulator;HTH arsR-type domain-containing protein	2	6	53	39	0.135184	0.283968	-1.8162	0.0363636	0.133333	-0.0969697	0.440452	Not significant	Not significant
group_16256	Chemotaxis protein	2	6	53	39	0.135184	0.283968	-1.8162	0.0363636	0.133333	-0.0969697	0.440452	Not significant	Not significant
group_1631	YhfC family intramembrane metalloprotease	2	6	53	39	0.135184	0.283968	-1.8162	0.0363636	0.133333	-0.0969697	0.440452	Not significant	Not significant
group_16572	Integral membrane protein	2	6	53	39	0.135184	0.283968	-1.8162	0.0363636	0.133333	-0.0969697	0.440452	Not significant	Not significant
group_1689	hypothetical protein	2	6	53	39	0.135184	0.283968	-1.8162	0.0363636	0.133333	-0.0969697	0.440452	Not significant	Not significant
group_1696	HTH tetR-type domain-containing protein;TetR/AcrR family transcriptional regulator	2	6	53	39	0.135184	0.283968	-1.8162	0.0363636	0.133333	-0.0969697	0.440452	Not significant	Not significant
group_1703	Rhodanese-like domain-containing protein;Rhodanese family protein	2	6	53	39	0.135184	0.283968	-1.8162	0.0363636	0.133333	-0.0969697	0.440452	Not significant	Not significant
group_1741	Polysaccharide biosynthesis protein;Transmembrane protein;Brp/Blh family beta-carotene 1515'-monooxygenase	2	6	53	39	0.135184	0.283968	-1.8162	0.0363636	0.133333	-0.0969697	0.440452	Not significant	Not significant
group_1757	DUF2812 domain-containing protein;PF11193 family protein	2	6	53	39	0.135184	0.283968	-1.8162	0.0363636	0.133333	-0.0969697	0.440452	Not significant	Not significant
group_17639	V-type ATP synthase subunit E	2	6	53	39	0.135184	0.283968	-1.8162	0.0363636	0.133333	-0.0969697	0.440452	Not significant	Not significant
group_17645	ATPases with chaperone activity ATP-binding subunit	2	6	53	39	0.135184	0.283968	-1.8162	0.0363636	0.133333	-0.0969697	0.440452	Not significant	Not significant
group_17819	V-type ATP synthase subunit C	2	6	53	39	0.135184	0.283968	-1.8162	0.0363636	0.133333	-0.0969697	0.440452	Not significant	Not significant
group_18145	DUF1211 domain-containing protein;hypothetical protein;Integral membrane protein	2	6	53	39	0.135184	0.283968	-1.8162	0.0363636	0.133333	-0.0969697	0.440452	Not significant	Not significant
group_18213	penicillin-binding protein PBP1B	2	6	53	39	0.135184	0.283968	-1.8162	0.0363636	0.133333	-0.0969697	0.440452	Not significant	Not significant
group_18252	Secreted protein with PEP-CTERM sorting signal;Gram-positive signal peptide protein YSIRK family	2	6	53	39	0.135184	0.283968	-1.8162	0.0363636	0.133333	-0.0969697	0.440452	Not significant	Not significant
group_18273	Transposase;hypothetical protein	2	6	53	39	0.135184	0.283968	-1.8162	0.0363636	0.133333	-0.0969697	0.440452	Not significant	Not significant
group_18522	Cof-like hydrolase	2	6	53	39	0.135184	0.283968	-1.8162	0.0363636	0.133333	-0.0969697	0.440452	Not significant	Not significant
group_18573	DpnD protein	2	6	53	39	0.135184	0.283968	-1.8162	0.0363636	0.133333	-0.0969697	0.440452	Not significant	Not significant
group_18668	Fe3+-siderophore ABC transporter ATPase;ABC transporter ATP-binding protein;ABC transporter domain-containing protein	2	6	53	39	0.135184	0.283968	-1.8162	0.0363636	0.133333	-0.0969697	0.440452	Not significant	Not significant
group_18829	Lipoprotein	2	6	53	39	0.135184	0.283968	-1.8162	0.0363636	0.133333	-0.0969697	0.440452	Not significant	Not significant
group_18923	Divergent AAA domain;ATP-binding protein;Putative Abi-alpha protein	2	6	53	39	0.135184	0.283968	-1.8162	0.0363636	0.133333	-0.0969697	0.440452	Not significant	Not significant
group_18970	FAD-binding FR-type domain-containing protein	2	6	53	39	0.135184	0.283968	-1.8162	0.0363636	0.133333	-0.0969697	0.440452	Not significant	Not significant
group_19103	type II toxin-antitoxin system antitoxin PezA	2	6	53	39	0.135184	0.283968	-1.8162	0.0363636	0.133333	-0.0969697	0.440452	Not significant	Not significant
group_19123	hypothetical protein	2	6	53	39	0.135184	0.283968	-1.8162	0.0363636	0.133333	-0.0969697	0.440452	Not significant	Not significant
group_19237	Dihydrodipicolinate reductase	2	6	53	39	0.135184	0.283968	-1.8162	0.0363636	0.133333	-0.0969697	0.440452	Not significant	Not significant
group_19257	Bacteriocin class II with double-glycine leader peptide	2	6	53	39	0.135184	0.283968	-1.8162	0.0363636	0.133333	-0.0969697	0.440452	Not significant	Not significant
group_19269	acetylornithine transaminase	2	6	53	39	0.135184	0.283968	-1.8162	0.0363636	0.133333	-0.0969697	0.440452	Not significant	Not significant
group_19402	tyrosine--tRNA ligase	2	6	53	39	0.135184	0.283968	-1.8162	0.0363636	0.133333	-0.0969697	0.440452	Not significant	Not significant
group_19430	hypothetical protein;CAAX amino terminal protease self-immunity;CPBP family intramembrane glutamic endopeptidase	2	6	53	39	0.135184	0.283968	-1.8162	0.0363636	0.133333	-0.0969697	0.440452	Not significant	Not significant
group_19506	Nuclear transport factor 2 family protein;nuclear transport factor 2 family protein;SnoaL-like domain-containing protein	2	6	53	39	0.135184	0.283968	-1.8162	0.0363636	0.133333	-0.0969697	0.440452	Not significant	Not significant
group_19625	DUF1694 domain-containing protein	2	6	53	39	0.135184	0.283968	-1.8162	0.0363636	0.133333	-0.0969697	0.440452	Not significant	Not significant
group_19708	Fe/B12 periplasmic-binding domain-containing protein	2	6	53	39	0.135184	0.283968	-1.8162	0.0363636	0.133333	-0.0969697	0.440452	Not significant	Not significant
group_19769	phosphomevalonate kinase	2	6	53	39	0.135184	0.283968	-1.8162	0.0363636	0.133333	-0.0969697	0.440452	Not significant	Not significant
group_19793	MutG family lantibiotic protection ABC superfamily ATP binding cassette transporter permease subunit;ABC-2 family transporter protein	2	6	53	39	0.135184	0.283968	-1.8162	0.0363636	0.133333	-0.0969697	0.440452	Not significant	Not significant
group_19794	ABC-2 family transporter protein	2	6	53	39	0.135184	0.283968	-1.8162	0.0363636	0.133333	-0.0969697	0.440452	Not significant	Not significant
group_19977	type II toxin-antitoxin system toxin PezT;UDP-N-acetylglucosamine kinase	2	6	53	39	0.135184	0.283968	-1.8162	0.0363636	0.133333	-0.0969697	0.440452	Not significant	Not significant
group_19988	DUF3021 domain-containing protein	2	6	53	39	0.135184	0.283968	-1.8162	0.0363636	0.133333	-0.0969697	0.440452	Not significant	Not significant
group_20007	Tetratricopeptide repeat protein	2	6	53	39	0.135184	0.283968	-1.8162	0.0363636	0.133333	-0.0969697	0.440452	Not significant	Not significant
group_20053	Multidrug ABC transporter	2	6	53	39	0.135184	0.283968	-1.8162	0.0363636	0.133333	-0.0969697	0.440452	Not significant	Not significant
group_20071	Aspartyl-tRNA synthetase	2	6	53	39	0.135184	0.283968	-1.8162	0.0363636	0.133333	-0.0969697	0.440452	Not significant	Not significant
group_20072	Acetylglutamate kinase	2	6	53	39	0.135184	0.283968	-1.8162	0.0363636	0.133333	-0.0969697	0.440452	Not significant	Not significant
group_20267	accessory Sec system glycosylation chaperone GtfB;UDP-N-acetylglucosamine--peptide N-acetylglucosaminyltransferase stabilizing protein GtfB	2	6	53	39	0.135184	0.283968	-1.8162	0.0363636	0.133333	-0.0969697	0.440452	Not significant	Not significant
group_20346	Multidrug transporter MATE	2	6	53	39	0.135184	0.283968	-1.8162	0.0363636	0.133333	-0.0969697	0.440452	Not significant	Not significant
group_20394	ABC-2 family transporter protein;Putative membrane protein;MutG family lantibiotic protection ABC transporter permease subunit	2	6	53	39	0.135184	0.283968	-1.8162	0.0363636	0.133333	-0.0969697	0.440452	Not significant	Not significant
group_20395	Bacitracin transport ATP binding cassette transporter ABC protein	2	6	53	39	0.135184	0.283968	-1.8162	0.0363636	0.133333	-0.0969697	0.440452	Not significant	Not significant
group_20525	DUF1310 domain-containing protein;hypothetical protein	2	6	53	39	0.135184	0.283968	-1.8162	0.0363636	0.133333	-0.0969697	0.440452	Not significant	Not significant
group_20529	glutamate--cysteine ligase	2	6	53	39	0.135184	0.283968	-1.8162	0.0363636	0.133333	-0.0969697	0.440452	Not significant	Not significant
group_20553	HTH tetR-type domain-containing protein;TetR/AcrR family transcriptional regulator	2	6	53	39	0.135184	0.283968	-1.8162	0.0363636	0.133333	-0.0969697	0.440452	Not significant	Not significant
group_2057	DUF2194 domain-containing protein;PF09960 family protein	2	6	53	39	0.135184	0.283968	-1.8162	0.0363636	0.133333	-0.0969697	0.440452	Not significant	Not significant
group_20571	HTH cro/C1-type domain-containing protein;Transcription regulator -like protein	2	6	53	39	0.135184	0.283968	-1.8162	0.0363636	0.133333	-0.0969697	0.440452	Not significant	Not significant
group_20572	bifunctional glutamate N-acetyltransferase/amino-acid acetyltransferase ArgJ	2	6	53	39	0.135184	0.283968	-1.8162	0.0363636	0.133333	-0.0969697	0.440452	Not significant	Not significant
group_20699	accessory Sec system glycosyltransferase GtfA;UDP-N-acetylglucosamine--peptide N-acetylglucosaminyltransferase GtfA subunit	2	6	53	39	0.135184	0.283968	-1.8162	0.0363636	0.133333	-0.0969697	0.440452	Not significant	Not significant
group_20786	ABC transporter domain-containing protein;Putative ABC transporter ATP-binding protein YxlF	2	6	53	39	0.135184	0.283968	-1.8162	0.0363636	0.133333	-0.0969697	0.440452	Not significant	Not significant
group_20787	MutG family lantibiotic protection ABC transporter permease subunit	2	6	53	39	0.135184	0.283968	-1.8162	0.0363636	0.133333	-0.0969697	0.440452	Not significant	Not significant
group_20872	Phage protein	2	6	53	39	0.135184	0.283968	-1.8162	0.0363636	0.133333	-0.0969697	0.440452	Not significant	Not significant
group_20886	CAAX amino protease;CAAX amino terminal protease family	2	6	53	39	0.135184	0.283968	-1.8162	0.0363636	0.133333	-0.0969697	0.440452	Not significant	Not significant
group_20899	N-acetyl-gamma-glutamyl-phosphate reductase	2	6	53	39	0.135184	0.283968	-1.8162	0.0363636	0.133333	-0.0969697	0.440452	Not significant	Not significant
group_20976	Bacteriocin immunity protein	2	6	53	39	0.135184	0.283968	-1.8162	0.0363636	0.133333	-0.0969697	0.440452	Not significant	Not significant
group_20980	accessory Sec system translocase SecA2	2	6	53	39	0.135184	0.283968	-1.8162	0.0363636	0.133333	-0.0969697	0.440452	Not significant	Not significant
group_21012	Chromosome partition protein Smc	2	6	53	39	0.135184	0.283968	-1.8162	0.0363636	0.133333	-0.0969697	0.440452	Not significant	Not significant
group_21034	Glycerate kinase	2	6	53	39	0.135184	0.283968	-1.8162	0.0363636	0.133333	-0.0969697	0.440452	Not significant	Not significant
group_21037	Lipoprotein	2	6	53	39	0.135184	0.283968	-1.8162	0.0363636	0.133333	-0.0969697	0.440452	Not significant	Not significant
group_21082	Flagellar FliJ protein	2	6	53	39	0.135184	0.283968	-1.8162	0.0363636	0.133333	-0.0969697	0.440452	Not significant	Not significant
group_21090	Gram-positive cocci surface proteins LPxTG domain-containing protein;hypothetical protein;MucBP domain-containing protein;Large variant muramidase-released protein	2	6	53	39	0.135184	0.283968	-1.8162	0.0363636	0.133333	-0.0969697	0.440452	Not significant	Not significant
group_21143	accessory Sec system protein Asp3	2	6	53	39	0.135184	0.283968	-1.8162	0.0363636	0.133333	-0.0969697	0.440452	Not significant	Not significant
group_21220	DUF2974 domain-containing protein;Triacylglycerol lipase;PRC-barrel domain-containing protein	2	6	53	39	0.135184	0.283968	-1.8162	0.0363636	0.133333	-0.0969697	0.440452	Not significant	Not significant
group_21252	accessory Sec system protein Asp2	2	6	53	39	0.135184	0.283968	-1.8162	0.0363636	0.133333	-0.0969697	0.440452	Not significant	Not significant
group_21321	accessory Sec system protein Asp1	2	6	53	39	0.135184	0.283968	-1.8162	0.0363636	0.133333	-0.0969697	0.440452	Not significant	Not significant
group_21323	hypothetical protein	2	6	53	39	0.135184	0.283968	-1.8162	0.0363636	0.133333	-0.0969697	0.440452	Not significant	Not significant
group_21380	accessory Sec system protein translocase subunit SecY2	2	6	53	39	0.135184	0.283968	-1.8162	0.0363636	0.133333	-0.0969697	0.440452	Not significant	Not significant
group_21422	sugar transferase	2	6	53	39	0.135184	0.283968	-1.8162	0.0363636	0.133333	-0.0969697	0.440452	Not significant	Not significant
group_21435	Immunoglobulin A1 protease;SIALI-17 repeat-containing surface protein	2	6	53	39	0.135184	0.283968	-1.8162	0.0363636	0.133333	-0.0969697	0.440452	Not significant	Not significant
group_21679	Type VII secretion effector TIGR04197 family	2	6	53	39	0.135184	0.283968	-1.8162	0.0363636	0.133333	-0.0969697	0.440452	Not significant	Not significant
group_21773	SnoaL-like domain-containing protein	2	6	53	39	0.135184	0.283968	-1.8162	0.0363636	0.133333	-0.0969697	0.440452	Not significant	Not significant
group_21777	Flagellar FliJ protein	2	6	53	39	0.135184	0.283968	-1.8162	0.0363636	0.133333	-0.0969697	0.440452	Not significant	Not significant
group_2286	N-acetyltransferase domain-containing protein	2	6	53	39	0.135184	0.283968	-1.8162	0.0363636	0.133333	-0.0969697	0.440452	Not significant	Not significant
group_246	MutT/nudix family protein;8-oxo-dGTP diphosphatase;Nudix hydrolase domain-containing protein	2	6	53	39	0.135184	0.283968	-1.8162	0.0363636	0.133333	-0.0969697	0.440452	Not significant	Not significant
group_2931	Lipoprotein;hypothetical protein	2	6	53	39	0.135184	0.283968	-1.8162	0.0363636	0.133333	-0.0969697	0.440452	Not significant	Not significant
group_3013	Histone acetyltransferase HPA2 putative;Acetyltransferase;Acetyltransferase GNAT family;N-acetyltransferase	2	6	53	39	0.135184	0.283968	-1.8162	0.0363636	0.133333	-0.0969697	0.440452	Not significant	Not significant
group_3072	alkaline shock response membrane anchor protein AmaP	2	6	53	39	0.135184	0.283968	-1.8162	0.0363636	0.133333	-0.0969697	0.440452	Not significant	Not significant
group_332	DEAD/DEAH box helicase;Competence ComFA-like protein	2	6	53	39	0.135184	0.283968	-1.8162	0.0363636	0.133333	-0.0969697	0.440452	Not significant	Not significant
group_6130	Aldose 1-epimerase family protein	2	6	53	39	0.135184	0.283968	-1.8162	0.0363636	0.133333	-0.0969697	0.440452	Not significant	Not significant
group_695	TipC family immunity protein;Lipoprotein;Conserved domain protein	2	6	53	39	0.135184	0.283968	-1.8162	0.0363636	0.133333	-0.0969697	0.440452	Not significant	Not significant
group_841	YcxB-like protein domain-containing protein	2	6	53	39	0.135184	0.283968	-1.8162	0.0363636	0.133333	-0.0969697	0.440452	Not significant	Not significant
group_87	Ribonuclease;LXG domain-containing protein;Transposase	2	6	53	39	0.135184	0.283968	-1.8162	0.0363636	0.133333	-0.0969697	0.440452	Not significant	Not significant
group_941	YolD-like protein	2	6	53	39	0.135184	0.283968	-1.8162	0.0363636	0.133333	-0.0969697	0.440452	Not significant	Not significant
group_999	DUF5960 domain-containing protein	2	6	53	39	0.135184	0.283968	-1.8162	0.0363636	0.133333	-0.0969697	0.440452	Not significant	Not significant
hmpT	Thiamine transporter HmpT	2	6	53	39	0.135184	0.283968	-1.8162	0.0363636	0.133333	-0.0969697	0.440452	Not significant	Not significant
pelF	GT4 family glycosyltransferase PelF	2	6	53	39	0.135184	0.283968	-1.8162	0.0363636	0.133333	-0.0969697	0.440452	Not significant	Not significant
rgg	HTH cro/C1-type domain-containing protein;HTH-type transcriptional regulator rgg	2	6	53	39	0.135184	0.283968	-1.8162	0.0363636	0.133333	-0.0969697	0.440452	Not significant	Not significant
slc2	SIALI-17 repeat-containing surface protein;hypothetical protein;LPXTG-anchored collagen-like adhesin Scl2/SclB;G5 domain-containing protein;YSIRK-type signal peptide-containing protein	2	6	53	39	0.135184	0.283968	-1.8162	0.0363636	0.133333	-0.0969697	0.440452	Not significant	Not significant
slyA	Transcriptional regulator SlyA	2	6	53	39	0.135184	0.283968	-1.8162	0.0363636	0.133333	-0.0969697	0.440452	Not significant	Not significant
spaA	LPXTG cell wall surface protein;Collagen-binding protein A;SpaA isopeptide-forming pilin-related protein;Collagen adhesion protein;Cna protein B-type domain protein	2	6	53	39	0.135184	0.283968	-1.8162	0.0363636	0.133333	-0.0969697	0.440452	Not significant	Not significant
tra5~~~tnp	Transposase InsO and inactivated derivatives;IS3 family transposase;IS3 family transposase ORF B	2	6	53	39	0.135184	0.283968	-1.8162	0.0363636	0.133333	-0.0969697	0.440452	Not significant	Not significant
group_2476	GNAT family N-acetyltransferase;Acetyltransferase (GNAT) family protein;Acetyltransferase GNAT family;hypothetical protein;N-acetyltransferase domain-containing protein;GNAT family acetyltransferase	14	18	41	27	0.136474	0.519375	-0.945152	0.254545	0.4	-0.145455	0.440452	Not significant	Not significant
group_2881	Cystathionine beta-lyase;cystathionine beta-lyase	14	18	41	27	0.136474	0.519375	-0.945152	0.254545	0.4	-0.145455	0.440452	Not significant	Not significant
blpS~~~lytR~~~lytT	LytTr DNA-binding domain protein;BlpS protein;LytR family transcriptional regulator;DNA-binding response regulator LytR/AlgR family	15	6	40	39	0.137723	2.32574	1.21769	0.272727	0.133333	0.139394	0.440452	Not significant	Not significant
group_21733	aminoglycoside 6'-N-acetyltransferase	15	6	40	39	0.137723	2.32574	1.21769	0.272727	0.133333	0.139394	0.440452	Not significant	Not significant
group_2554	NAD(P)-dependent dehydrogenase short-chain alcohol dehydrogenase family;3-oxoacyl-[acyl-carrier-protein] reductase FabG	15	6	40	39	0.137723	2.32574	1.21769	0.272727	0.133333	0.139394	0.440452	Not significant	Not significant
srlA	Phosphotransferase system sorbitol-specific IIC component;PTS family glucitol/sorbitol porter IIC component	15	6	40	39	0.137723	2.32574	1.21769	0.272727	0.133333	0.139394	0.440452	Not significant	Not significant
srlB	Phosphotransferase system sorbitol-specific IIA component;PTS family glucitol/sorbitol porter IIA component	15	6	40	39	0.137723	2.32574	1.21769	0.272727	0.133333	0.139394	0.440452	Not significant	Not significant
srlE	Phosphotransferase system sorbitol-specific IIB component;PTS family glucitol/sorbitol porter IIB component	15	6	40	39	0.137723	2.32574	1.21769	0.272727	0.133333	0.139394	0.440452	Not significant	Not significant
group_17315	Chlorohydrolase	8	12	47	33	0.1422	0.479579	-1.06016	0.145455	0.266667	-0.121212	0.440452	Not significant	Not significant
group_20095	Holin-like toxin;hypothetical protein	8	12	47	33	0.1422	0.479579	-1.06016	0.145455	0.266667	-0.121212	0.440452	Not significant	Not significant
group_2283	N-acetyltransferase domain-containing protein;Acetyltransferase;GNAT family acetyltransferase PhnO	8	12	47	33	0.1422	0.479579	-1.06016	0.145455	0.266667	-0.121212	0.440452	Not significant	Not significant
group_2344	Transcriptional regulator MarR family;Winged helix DNA-binding protein;HTH marR-type domain-containing protein	8	12	47	33	0.1422	0.479579	-1.06016	0.145455	0.266667	-0.121212	0.440452	Not significant	Not significant
group_2407	Streptomycin adenylyltransferase;Aminoglycoside 6-adenylyltransferase;hypothetical protein	8	12	47	33	0.1422	0.479579	-1.06016	0.145455	0.266667	-0.121212	0.440452	Not significant	Not significant
group_2873	C69 family dipeptidase	8	12	47	33	0.1422	0.479579	-1.06016	0.145455	0.266667	-0.121212	0.440452	Not significant	Not significant
group_15676	Acid-resistance membrane protein;DUF308 domain-containing protein	16	20	39	25	0.143576	0.519605	-0.944513	0.290909	0.444444	-0.153535	0.440452	Not significant	Not significant
acpP	Acyl carrier protein	31	32	24	13	0.148971	0.534066	-0.90491	0.563636	0.711111	-0.147475	0.440452	Not significant	Not significant
comF~~~recG~~~comFA	Putative ATP-dependent RNA helicase;ComF operon protein A DNA transporter ATPase;Competence protein ComFA;Helicase;ATP-dependent DNA helicase RecG;Superfamily II DNA/RNA helicase required for DNA uptake (late competence protein);DEAD/DEAH box helicase	31	32	24	13	0.148971	0.534066	-0.90491	0.563636	0.711111	-0.147475	0.440452	Not significant	Not significant
cysK	cysteine synthase A	31	32	24	13	0.148971	0.534066	-0.90491	0.563636	0.711111	-0.147475	0.440452	Not significant	Not significant
fmnP	Riboflavin transporter;Riboflavin transporter FmnP;ECF transporter S component	31	32	24	13	0.148971	0.534066	-0.90491	0.563636	0.711111	-0.147475	0.440452	Not significant	Not significant
fmt	methionyl-tRNA formyltransferase;formyltransferase family protein	31	32	24	13	0.148971	0.534066	-0.90491	0.563636	0.711111	-0.147475	0.440452	Not significant	Not significant
gmk	guanylate kinase	31	32	24	13	0.148971	0.534066	-0.90491	0.563636	0.711111	-0.147475	0.440452	Not significant	Not significant
gntR~~~ytrA~~~yhcF	Putative transcriptional regulator;Transcriptional regulator GntR family;HTH gntR-type domain-containing protein;HTH-type transcriptional repressor YtrA;DNA-binding transcriptional regulator YhcF GntR family	31	32	24	13	0.148971	0.534066	-0.90491	0.563636	0.711111	-0.147475	0.440452	Not significant	Not significant
group_1535	cell division protein FtsL;Cell division protein FtsL	31	32	24	13	0.148971	0.534066	-0.90491	0.563636	0.711111	-0.147475	0.440452	Not significant	Not significant
group_1763	Prolyl-tRNA synthetase;Nucleotidyltransferase family protein;nucleotidyltransferase family protein	31	32	24	13	0.148971	0.534066	-0.90491	0.563636	0.711111	-0.147475	0.440452	Not significant	Not significant
group_1805	Ribosome hibernation promoting factor;Ribosome-associated translation inhibitor RaiA	31	32	24	13	0.148971	0.534066	-0.90491	0.563636	0.711111	-0.147475	0.440452	Not significant	Not significant
group_2009	primosomal protein N'	31	32	24	13	0.148971	0.534066	-0.90491	0.563636	0.711111	-0.147475	0.440452	Not significant	Not significant
group_2223	Solute-binding protein family 3/N-terminal domain-containing protein;ABC-type amino acid transport/signal transduction system periplasmic component/domain	31	32	24	13	0.148971	0.534066	-0.90491	0.563636	0.711111	-0.147475	0.440452	Not significant	Not significant
group_2542	16S rRNA (guanine(966)-N(2))-methyltransferase RsmD;Methyltransferase;16S rRNA (Guanine(966)-N(2))-methyltransferase RsmD	31	32	24	13	0.148971	0.534066	-0.90491	0.563636	0.711111	-0.147475	0.440452	Not significant	Not significant
pTC1~~~phpP	Stp1/IreP family PP2C-type Ser/Thr phosphatase	31	32	24	13	0.148971	0.534066	-0.90491	0.563636	0.711111	-0.147475	0.440452	Not significant	Not significant
rpoZ	DNA-directed RNA polymerase subunit omega	31	32	24	13	0.148971	0.534066	-0.90491	0.563636	0.711111	-0.147475	0.440452	Not significant	Not significant
rsmB	16S rRNA (cytosine(967)-C(5))-methyltransferase RsmB	31	32	24	13	0.148971	0.534066	-0.90491	0.563636	0.711111	-0.147475	0.440452	Not significant	Not significant
sepM~~~coaD~~~sdrC	SepM family pheromone-processing serine protease;pantetheine-phosphate adenylyltransferase;endopeptidase La;Phosphopantetheine adenylyltransferase	31	32	24	13	0.148971	0.534066	-0.90491	0.563636	0.711111	-0.147475	0.440452	Not significant	Not significant
yigZ~~~yIH1	Xaa-Pro dipeptidase;YigZ family protein;Putative translation regulator IMPACT (imprinted ancient) protein family	31	32	24	13	0.148971	0.534066	-0.90491	0.563636	0.711111	-0.147475	0.440452	Not significant	Not significant
ylbG	UPF0298 protein D8829_00950;UPF0298 protein HMPREF0813_00695;UPF0298 protein C6A33_01475;UPF0298 protein HMPREF9184_01783;UPF0298 protein HMPREF1116_0950;UPF0298 protein HMPREF9423_0421;UPF0298 protein SPJ_0686;UPF0298 protein HMPREF1110_0846	31	32	24	13	0.148971	0.534066	-0.90491	0.563636	0.711111	-0.147475	0.440452	Not significant	Not significant
group_15793	Cobalt transport protein	24	13	31	32	0.148971	1.87243	0.90491	0.436364	0.288889	0.147475	0.440452	Not significant	Not significant
group_16142	Signal transduction histidine kinase LytS	24	13	31	32	0.148971	1.87243	0.90491	0.436364	0.288889	0.147475	0.440452	Not significant	Not significant
group_16186	hypothetical protein;Cobalt transport protein CbiQ;Cobalt/nickel transport system ATP-binding protein	24	13	31	32	0.148971	1.87243	0.90491	0.436364	0.288889	0.147475	0.440452	Not significant	Not significant
group_16215	Cobalt transport system ATP-binding protein	24	13	31	32	0.148971	1.87243	0.90491	0.436364	0.288889	0.147475	0.440452	Not significant	Not significant
purE	Phosphoribosylcarboxyaminoimidazole (NCAIR) mutase;N5-carboxyaminoimidazole ribonucleotide mutase;hypothetical protein;Phosphoribosylaminoimidazole carboxylase catalytic subunit	26	14	29	31	0.15057	1.95149	0.964576	0.472727	0.311111	0.161616	0.440452	Not significant	Not significant
arlR	Response regulator ArlR	5	9	50	36	0.151308	0.418447	-1.25688	0.0909091	0.2	-0.109091	0.440452	Not significant	Not significant
group_1790	Single-stranded DNA-binding protein;Single-strand binding family protein;single-stranded DNA-binding protein	5	9	50	36	0.151308	0.418447	-1.25688	0.0909091	0.2	-0.109091	0.440452	Not significant	Not significant
group_18625	Clp protease	5	9	50	36	0.151308	0.418447	-1.25688	0.0909091	0.2	-0.109091	0.440452	Not significant	Not significant
group_19875	ABC-2 family transporter protein;Lantibiotic ABC transporter permease;ABC transporter permease	5	9	50	36	0.151308	0.418447	-1.25688	0.0909091	0.2	-0.109091	0.440452	Not significant	Not significant
group_20450	ABC-2 family transporter protein;ABC transporter permease	5	9	50	36	0.151308	0.418447	-1.25688	0.0909091	0.2	-0.109091	0.440452	Not significant	Not significant
group_20451	Multidrug ABC transporter	5	9	50	36	0.151308	0.418447	-1.25688	0.0909091	0.2	-0.109091	0.440452	Not significant	Not significant
group_20452	histidine kinase;hypothetical protein	5	9	50	36	0.151308	0.418447	-1.25688	0.0909091	0.2	-0.109091	0.440452	Not significant	Not significant
group_21699	DUF3899 domain-containing protein;hypothetical protein	5	9	50	36	0.151308	0.418447	-1.25688	0.0909091	0.2	-0.109091	0.440452	Not significant	Not significant
ydeE	putative transcriptional regulator YdeE contains AraC-type DNA-binding domain;HTH araC/xylS-type domain-containing protein;GyrI-like small molecule binding domain-containing protein	5	9	50	36	0.151308	0.418447	-1.25688	0.0909091	0.2	-0.109091	0.440452	Not significant	Not significant
group_1670	Integrative and conjugative element protein	9	13	46	32	0.151701	0.491836	-1.02375	0.163636	0.288889	-0.125253	0.440452	Not significant	Not significant
group_20756	DUF1146 domain-containing protein;Phosphopantetheine adenylyltransferase	9	13	46	32	0.151701	0.491836	-1.02375	0.163636	0.288889	-0.125253	0.440452	Not significant	Not significant
rpiR	RpiR family transcriptional regulator;RpiR family phosphosugar-binding transcriptional regulator;HTH-type transcriptional regulator RpiR;Sialic acid utilization regulator RpiR family;Putative phosphosugar-binding transcriptional regulator	9	13	46	32	0.151701	0.491836	-1.02375	0.163636	0.288889	-0.125253	0.440452	Not significant	Not significant
sigW	ECF family DNA-directed RNA polymerase sigma subunit SigW;DNA-directed RNA polymerase specialized sigma subunit sigma24-like protein;Putative sigma factor	9	13	46	32	0.151701	0.491836	-1.02375	0.163636	0.288889	-0.125253	0.440452	Not significant	Not significant
group_2842	Bacitracin ABC transporter ATP-binding protein;ABC transporter domain-containing protein;ABC superfamily ATP binding cassette transporter ABC protein;ABC transporter protein;ABC transporter ATP-binding protein;Putative ABC transporter ATP-binding protein;ATP-binding cassette domain-containing protein	39	38	16	7	0.152132	0.466352	-1.10051	0.709091	0.844444	-0.135354	0.440452	Not significant	Not significant
group_20218	SseB protein N-terminal domain-containing protein	16	7	39	38	0.152132	2.1443	1.10051	0.290909	0.155556	0.135354	0.440452	Not significant	Not significant
group_1839	Isoleucyl-tRNA synthetase	28	30	27	15	0.154016	0.526677	-0.925011	0.509091	0.666667	-0.157576	0.440452	Not significant	Not significant
marR~~~mgrA	HTH marR-type domain-containing protein;MarR family winged helix-turn-helix transcriptional regulator;MarR family transcriptional regulator;HTH-type transcriptional regulator MgrA;DNA-binding transcriptional regulator MarR family	30	31	25	14	0.15587	0.550576	-0.860987	0.545455	0.688889	-0.143434	0.440452	Not significant	Not significant
mntH	Mn2+/Fe2+ transporter NRAMP family;Nramp family divalent metal transporter;Divalent metal cation transporter;Natural resistance-associated macrophage family protein;Divalent metal cation transporter MntH	30	31	25	14	0.15587	0.550576	-0.860987	0.545455	0.688889	-0.143434	0.440452	Not significant	Not significant
galT2~~~galT	UDP-glucose--hexose-1-phosphate uridylyltransferase;Galactose-1-phosphate uridylyltransferase;Putative UTP--hexose-1-phosphate uridylyltransferase;hypothetical protein	27	29	28	16	0.157428	0.539697	-0.889779	0.490909	0.644444	-0.153535	0.440452	Not significant	Not significant
group_1771	DUF1827 domain-containing protein;Ribose-5-phosphate isomerase A;PF08860 domain protein	27	29	28	16	0.157428	0.539697	-0.889779	0.490909	0.644444	-0.153535	0.440452	Not significant	Not significant
group_1804	O-acetylhomoserine sulfhydrylase / O-succinylhomoserine sulfhydrylase;O-acetylhomoserine sulfhydrylase;aminotransferase class I/II-fold pyridoxal phosphate-dependent enzyme;O-acetylhomoserine aminocarboxypropyltransferase/cysteine synthase family protein;O-acetylhomoserine (Thiol)-lyase	27	29	28	16	0.157428	0.539697	-0.889779	0.490909	0.644444	-0.153535	0.440452	Not significant	Not significant
group_19418	ATPase components of ABC transporters with duplicated ATPase domains;ATP-binding cassette domain-containing protein	27	29	28	16	0.157428	0.539697	-0.889779	0.490909	0.644444	-0.153535	0.440452	Not significant	Not significant
group_21328	galactokinase;hypothetical protein;galactokinase family protein	27	29	28	16	0.157428	0.539697	-0.889779	0.490909	0.644444	-0.153535	0.440452	Not significant	Not significant
group_2644	CAAX amino terminal protease self-immunity;CPBP family intramembrane metalloprotease;CAAX amino terminal protease;CAAX amino terminal protease family;SSU0695 undefined product;CAAX amino protease;CAAX amino terminal protease family protein;CAAX protease self-immunity;hypothetical protein	27	29	28	16	0.157428	0.539697	-0.889779	0.490909	0.644444	-0.153535	0.440452	Not significant	Not significant
group_2934	ABC transporter ATP-binding protein;Lipid A export ATP-binding/permease protein MsbA;ATP-binding permease;ABC transporter ATP binding and permease protein;multidrug efflux ABC transporter subunit PatB	27	29	28	16	0.157428	0.539697	-0.889779	0.490909	0.644444	-0.153535	0.440452	Not significant	Not significant
ispA	farnesyl diphosphate synthase;polyprenyl synthetase family protein	27	29	28	16	0.157428	0.539697	-0.889779	0.490909	0.644444	-0.153535	0.440452	Not significant	Not significant
marR~~~adcR	zinc-dependent MarR family transcriptional regulator;zinc-dependent transcriptional regulator AdcR	27	29	28	16	0.157428	0.539697	-0.889779	0.490909	0.644444	-0.153535	0.440452	Not significant	Not significant
tauB	ABC transporter ATP-binding protein;ABC-type nitrate/sulfonate/bicarbonate transport system ATPase component	27	29	28	16	0.157428	0.539697	-0.889779	0.490909	0.644444	-0.153535	0.440452	Not significant	Not significant
yheI~~~msbA~~~mdlB~~~patA	Putative multidrug resistance ABC transporter ATP-binding/permease protein YheI;Lipid A export ATP-binding/permease protein MsbA;Multidrug ABC transporter ATPase/permease;ABC transporter ATP-binding protein;multidrug efflux ABC transporter subunit PatA;ABC-type multidrug transport system ATPase and permease component	27	29	28	16	0.157428	0.539697	-0.889779	0.490909	0.644444	-0.153535	0.440452	Not significant	Not significant
tatA	Sec-independent protein translocase protein TatAd;Preprotein translocase subunit TatA;TatA sec-independent protein secretion pathway component;Twin arginine-targeting protein translocase TatA/E family;Sec-independent protein translocase protein TatA;twin-arginine translocase TatA/TatE family subunit	19	22	36	23	0.159047	0.557991	-0.841687	0.345455	0.488889	-0.143434	0.440452	Not significant	Not significant
eCFS	ECF-type riboflavin transporter substrate-binding protein	20	23	35	22	0.159051	0.552892	-0.854931	0.363636	0.511111	-0.147475	0.440452	Not significant	Not significant
efeO	iron uptake system protein EfeO;Lipoprotein;Imelysin-like domain-containing protein	20	23	35	22	0.159051	0.552892	-0.854931	0.363636	0.511111	-0.147475	0.440452	Not significant	Not significant
btuE	Glutathione peroxidase;glutathione peroxidase;Thioredoxin/glutathione peroxidase BtuE reduces lipid peroxides	34	21	21	24	0.159062	1.82856	0.870705	0.618182	0.466667	0.151515	0.440452	Not significant	Not significant
group_3121	Tellurite resistance protein;Toxic anion resistance protein	21	24	34	21	0.159062	0.54688	-0.870705	0.381818	0.533333	-0.151515	0.440452	Not significant	Not significant
mazG	NTP pyrophosphohydrolase MazG-like domain-containing protein;MazG nucleotide pyrophosphohydrolase domain protein;hypothetical protein;Nucleotide pyrophosphohydrolase;MazG nucleotide pyrophosphohydrolase domain-containing protein	29	17	26	28	0.160808	1.81294	0.85833	0.527273	0.377778	0.149495	0.440452	Not significant	Not significant
yjaB~~~rimI	Acetyltransferase GNAT family;N-acetyltransferase domain-containing protein;GNAT family N-acetyltransferase;Acetyltransferase gnat family;Acetyltransferase;GNAT family acetyltransferase;Putative N-acetyltransferase YjaB;Ribosomal protein S18 acetylase RimI and related acetyltransferases	29	17	26	28	0.160808	1.81294	0.85833	0.527273	0.377778	0.149495	0.440452	Not significant	Not significant
group_16743	sigma(X)-activator ComW	10	14	45	31	0.161027	0.501326	-0.996178	0.181818	0.311111	-0.129293	0.440452	Not significant	Not significant
group_17039	DUF4299 domain-containing protein	10	14	45	31	0.161027	0.501326	-0.996178	0.181818	0.311111	-0.129293	0.440452	Not significant	Not significant
group_18508	Cell division protein DivIB;Cell division septal protein FtsQ	10	14	45	31	0.161027	0.501326	-0.996178	0.181818	0.311111	-0.129293	0.440452	Not significant	Not significant
group_19299	competence-stimulating peptide ComC	10	14	45	31	0.161027	0.501326	-0.996178	0.181818	0.311111	-0.129293	0.440452	Not significant	Not significant
group_19914	Nicotinamide mononucleotide transporter	10	14	45	31	0.161027	0.501326	-0.996178	0.181818	0.311111	-0.129293	0.440452	Not significant	Not significant
group_19996	DUF3642 domain-containing protein;SP_0198 family lipoprotein	10	14	45	31	0.161027	0.501326	-0.996178	0.181818	0.311111	-0.129293	0.440452	Not significant	Not significant
group_2657	Putative ABC transporter permease component;ABC transporter permease;Branched-chain amino acid ABC transporter permease protein	10	14	45	31	0.161027	0.501326	-0.996178	0.181818	0.311111	-0.129293	0.440452	Not significant	Not significant
group_3059	Lactoylglutathione lyase or related lyase;Glyoxalase family protein;VOC domain-containing protein;Glyoxalase-like domain protein;Glyoxalase;Putative glyoxalase;Asparaginyl-tRNA synthetase;Glyoxalase domain protein	10	14	45	31	0.161027	0.501326	-0.996178	0.181818	0.311111	-0.129293	0.440452	Not significant	Not significant
aroE	Shikimate dehydrogenase (NADP(+));hypothetical protein	11	4	44	41	0.162352	2.38327	1.25294	0.2	0.0888889	0.111111	0.440452	Not significant	Not significant
azlC~~~ygaZ	LIV-E family branched chain amino acid permease AzlC;Inner membrane protein YgaZ	11	4	44	41	0.162352	2.38327	1.25294	0.2	0.0888889	0.111111	0.440452	Not significant	Not significant
birA	bifunctional biotin--[acetyl-CoA-carboxylase] ligase/biotin operon repressor BirA	11	4	44	41	0.162352	2.38327	1.25294	0.2	0.0888889	0.111111	0.440452	Not significant	Not significant
brkB~~~yihY	YihY/virulence factor BrkB family protein;YihY family protein	11	4	44	41	0.162352	2.38327	1.25294	0.2	0.0888889	0.111111	0.440452	Not significant	Not significant
flgM	Neutral zinc metallopeptidase;Putative neutral zinc metallopeptidase;Flagellar biosynthesis protein FlgM	11	4	44	41	0.162352	2.38327	1.25294	0.2	0.0888889	0.111111	0.440452	Not significant	Not significant
fni	type 2 isopentenyl-diphosphate Delta-isomerase;Isopentenyl-diphosphate delta-isomerase FMN-dependent;hypothetical protein;Isopentenyl-diphosphate delta-isomerase	11	4	44	41	0.162352	2.38327	1.25294	0.2	0.0888889	0.111111	0.440452	Not significant	Not significant
group_1282	Endolytic murein transglycosylase;hypothetical protein	11	4	44	41	0.162352	2.38327	1.25294	0.2	0.0888889	0.111111	0.440452	Not significant	Not significant
group_1341	membrane protein insertase YidC	11	4	44	41	0.162352	2.38327	1.25294	0.2	0.0888889	0.111111	0.440452	Not significant	Not significant
group_1366	Transfer protein;Peptidase C51 domain-containing protein;Immunogenic secreted protein;CHAP domain protein	11	4	44	41	0.162352	2.38327	1.25294	0.2	0.0888889	0.111111	0.440452	Not significant	Not significant
group_138	GNAT family N-acetyltransferase;N-acetyltransferase domain-containing protein	11	4	44	41	0.162352	2.38327	1.25294	0.2	0.0888889	0.111111	0.440452	Not significant	Not significant
group_152	YhgE/Pip domain-containing protein;ABC-2 type transporter transmembrane domain-containing protein;YhgE/Pip family protein	11	4	44	41	0.162352	2.38327	1.25294	0.2	0.0888889	0.111111	0.440452	Not significant	Not significant
group_16587	D-Ala-teichoic acid biosynthesis protein;D-alanyl-lipoteichoic acid biosynthesis protein	11	4	44	41	0.162352	2.38327	1.25294	0.2	0.0888889	0.111111	0.440452	Not significant	Not significant
group_16922	PucR C-terminal helix-turn-helix domain-containing protein;Leucine-rich protein;PucR family transcriptional regulator;Leucine rich protein	11	4	44	41	0.162352	2.38327	1.25294	0.2	0.0888889	0.111111	0.440452	Not significant	Not significant
group_16963	peptide chain release factor N(5)-glutamine methyltransferase;hypothetical protein	11	4	44	41	0.162352	2.38327	1.25294	0.2	0.0888889	0.111111	0.440452	Not significant	Not significant
group_1700	DUF3165 domain-containing protein	11	4	44	41	0.162352	2.38327	1.25294	0.2	0.0888889	0.111111	0.440452	Not significant	Not significant
group_17151	ABC-2 family transporter protein	11	4	44	41	0.162352	2.38327	1.25294	0.2	0.0888889	0.111111	0.440452	Not significant	Not significant
group_17948	DUF2975 domain-containing protein	11	4	44	41	0.162352	2.38327	1.25294	0.2	0.0888889	0.111111	0.440452	Not significant	Not significant
group_17963	DUF3278 domain-containing protein;Toxin secretion/phage lysis holin;DUF6773 domain-containing protein	11	4	44	41	0.162352	2.38327	1.25294	0.2	0.0888889	0.111111	0.440452	Not significant	Not significant
group_18100	Cobalt-zinc-cadmium resistance protein;Cation efflux family protein;Cation efflux protein cytoplasmic domain-containing protein;hypothetical protein	11	4	44	41	0.162352	2.38327	1.25294	0.2	0.0888889	0.111111	0.440452	Not significant	Not significant
group_18350	Transcriptional regulator;HTH cro/C1-type domain-containing protein	11	4	44	41	0.162352	2.38327	1.25294	0.2	0.0888889	0.111111	0.440452	Not significant	Not significant
group_18429	D-alanine--poly(phosphoribitol) ligase subunit DltA	11	4	44	41	0.162352	2.38327	1.25294	0.2	0.0888889	0.111111	0.440452	Not significant	Not significant
group_18763	Homoserine O-succinyltransferase;putative acyltransferase;homoserine O-succinyltransferase	11	4	44	41	0.162352	2.38327	1.25294	0.2	0.0888889	0.111111	0.440452	Not significant	Not significant
group_18834	hypothetical protein;DegV family protein	11	4	44	41	0.162352	2.38327	1.25294	0.2	0.0888889	0.111111	0.440452	Not significant	Not significant
group_18916	CAAX amino terminal protease;CAAX amino terminal protease family protein;CPBP family intramembrane metalloprotease	11	4	44	41	0.162352	2.38327	1.25294	0.2	0.0888889	0.111111	0.440452	Not significant	Not significant
group_19005	Putative hydrolase;Phosphoglycolate phosphatase	11	4	44	41	0.162352	2.38327	1.25294	0.2	0.0888889	0.111111	0.440452	Not significant	Not significant
group_19006	Pr6Pr family membrane protein	11	4	44	41	0.162352	2.38327	1.25294	0.2	0.0888889	0.111111	0.440452	Not significant	Not significant
group_19163	Cell wall-active antibiotics response LiaF-like C-terminal domain-containing protein	11	4	44	41	0.162352	2.38327	1.25294	0.2	0.0888889	0.111111	0.440452	Not significant	Not significant
group_19243	ABC3 transporter permease protein domain-containing protein;ABC transporter permease;hypothetical protein	11	4	44	41	0.162352	2.38327	1.25294	0.2	0.0888889	0.111111	0.440452	Not significant	Not significant
group_19332	D-alanyl-D-alanine carboxypeptidase;Beta-lactamase class A catalytic domain-containing protein	11	4	44	41	0.162352	2.38327	1.25294	0.2	0.0888889	0.111111	0.440452	Not significant	Not significant
group_19376	DUF1129 domain-containing protein;hypothetical protein;Membrane protein	11	4	44	41	0.162352	2.38327	1.25294	0.2	0.0888889	0.111111	0.440452	Not significant	Not significant
group_19489	tRNA epoxyqueuosine(34) reductase QueG;4Fe-4S ferredoxin-type domain-containing protein;Iron-sulfur protein	11	4	44	41	0.162352	2.38327	1.25294	0.2	0.0888889	0.111111	0.440452	Not significant	Not significant
group_19495	YjjG family noncanonical pyrimidine nucleotidase;hypothetical protein;HAD hydrolase-like protein	11	4	44	41	0.162352	2.38327	1.25294	0.2	0.0888889	0.111111	0.440452	Not significant	Not significant
group_19505	ABC transporter ATP-binding protein;tetracycline efflux ABC transporter Tet(46) subunit A	11	4	44	41	0.162352	2.38327	1.25294	0.2	0.0888889	0.111111	0.440452	Not significant	Not significant
group_19538	D-alanyl-lipoteichoic acid biosynthesis protein DltB	11	4	44	41	0.162352	2.38327	1.25294	0.2	0.0888889	0.111111	0.440452	Not significant	Not significant
group_1957	type I pullulanase;hypothetical protein	11	4	44	41	0.162352	2.38327	1.25294	0.2	0.0888889	0.111111	0.440452	Not significant	Not significant
group_19580	FAD:protein FMN transferase	11	4	44	41	0.162352	2.38327	1.25294	0.2	0.0888889	0.111111	0.440452	Not significant	Not significant
group_19709	thiol-disulfide oxidoreductase-associated membrane protein CcdA2	11	4	44	41	0.162352	2.38327	1.25294	0.2	0.0888889	0.111111	0.440452	Not significant	Not significant
group_19739	UDP-glucose 4-epimerase;UDP-glucose 4-epimerase GalE	11	4	44	41	0.162352	2.38327	1.25294	0.2	0.0888889	0.111111	0.440452	Not significant	Not significant
group_19795	Putative histidine kinase;histidine kinase	11	4	44	41	0.162352	2.38327	1.25294	0.2	0.0888889	0.111111	0.440452	Not significant	Not significant
group_19819	Permease;TIGR02185 family protein;MptD family putative ECF transporter S component;hypothetical protein;Substrate-specific component of putative ECF transporter	11	4	44	41	0.162352	2.38327	1.25294	0.2	0.0888889	0.111111	0.440452	Not significant	Not significant
group_19824	DUF3307 domain-containing protein;Membrane protein	11	4	44	41	0.162352	2.38327	1.25294	0.2	0.0888889	0.111111	0.440452	Not significant	Not significant
group_19832	Peroxide operon regulator	11	4	44	41	0.162352	2.38327	1.25294	0.2	0.0888889	0.111111	0.440452	Not significant	Not significant
group_19864	Thioredoxin family protein;Thioredoxin domain-containing protein;Peptide methionine sulfoxide reductase MsrA/MsrB	11	4	44	41	0.162352	2.38327	1.25294	0.2	0.0888889	0.111111	0.440452	Not significant	Not significant
group_19872	Ribokinase;Carbohydrate kinase PfkB domain-containing protein;Carbohydrate kinase family protein	11	4	44	41	0.162352	2.38327	1.25294	0.2	0.0888889	0.111111	0.440452	Not significant	Not significant
group_19885	Acriflavin resistance protein A;RND efflux pump membrane fusion protein barrel-sandwich domain-containing protein	11	4	44	41	0.162352	2.38327	1.25294	0.2	0.0888889	0.111111	0.440452	Not significant	Not significant
group_19908	DUF3114 domain-containing protein	11	4	44	41	0.162352	2.38327	1.25294	0.2	0.0888889	0.111111	0.440452	Not significant	Not significant
group_19956	Amidase;Peptidase C51 domain-containing protein;CHAP domain-containing protein	11	4	44	41	0.162352	2.38327	1.25294	0.2	0.0888889	0.111111	0.440452	Not significant	Not significant
group_19993	LytTR family transcriptional regulator;DNA-binding protein;HTH LytTR-type domain-containing protein	11	4	44	41	0.162352	2.38327	1.25294	0.2	0.0888889	0.111111	0.440452	Not significant	Not significant
group_20009	LytTR family transcriptional regulator;Response regulator of the LytR/AlgR family protein;DNA-binding response regulator LytR/AlgR family	11	4	44	41	0.162352	2.38327	1.25294	0.2	0.0888889	0.111111	0.440452	Not significant	Not significant
group_20058	ABC transporter substrate-binding protein family 5;Solute-binding protein family 5 domain-containing protein	11	4	44	41	0.162352	2.38327	1.25294	0.2	0.0888889	0.111111	0.440452	Not significant	Not significant
group_20094	hypothetical protein	11	4	44	41	0.162352	2.38327	1.25294	0.2	0.0888889	0.111111	0.440452	Not significant	Not significant
group_201	Alpha/beta fold family hydrolase;45:910-diseco-3-hydroxy-59 17-trioxoandrosta-1(10)2-diene-4-oate hydrolase	11	4	44	41	0.162352	2.38327	1.25294	0.2	0.0888889	0.111111	0.440452	Not significant	Not significant
group_20110	Helicase HerA-like C-terminal domain-containing protein;DUF853 domain-containing protein;hypothetical protein	11	4	44	41	0.162352	2.38327	1.25294	0.2	0.0888889	0.111111	0.440452	Not significant	Not significant
group_20124	DUF2871 domain-containing protein;CAAX protease	11	4	44	41	0.162352	2.38327	1.25294	0.2	0.0888889	0.111111	0.440452	Not significant	Not significant
group_20169	Nucleotidyltransferase family protein;Prolyl-tRNA synthetase	11	4	44	41	0.162352	2.38327	1.25294	0.2	0.0888889	0.111111	0.440452	Not significant	Not significant
group_20190	Protease synthase and sporulation negative regulatory protein PAI 1;Acetyltransferase (GNAT) family protein;N-acetyltransferase	11	4	44	41	0.162352	2.38327	1.25294	0.2	0.0888889	0.111111	0.440452	Not significant	Not significant
group_20205	Major facilitator superfamily (MFS) profile domain-containing protein	11	4	44	41	0.162352	2.38327	1.25294	0.2	0.0888889	0.111111	0.440452	Not significant	Not significant
group_20208	DUF1722 domain-containing protein	11	4	44	41	0.162352	2.38327	1.25294	0.2	0.0888889	0.111111	0.440452	Not significant	Not significant
group_20234	D-alanine--poly(phosphoribitol) ligase subunit DltC	11	4	44	41	0.162352	2.38327	1.25294	0.2	0.0888889	0.111111	0.440452	Not significant	Not significant
group_20235	Integral membrane protein	11	4	44	41	0.162352	2.38327	1.25294	0.2	0.0888889	0.111111	0.440452	Not significant	Not significant
group_20257	Macrolide export ATP-binding/permease protein MacB;hypothetical protein	11	4	44	41	0.162352	2.38327	1.25294	0.2	0.0888889	0.111111	0.440452	Not significant	Not significant
group_20320	ABC transporter domain-containing protein	11	4	44	41	0.162352	2.38327	1.25294	0.2	0.0888889	0.111111	0.440452	Not significant	Not significant
group_20321	histidine kinase	11	4	44	41	0.162352	2.38327	1.25294	0.2	0.0888889	0.111111	0.440452	Not significant	Not significant
group_20379	Serine/alanine adding enzyme;Aminoacyltransferase;hypothetical protein;tRNA-dependent lipid II--L-alanine ligase	11	4	44	41	0.162352	2.38327	1.25294	0.2	0.0888889	0.111111	0.440452	Not significant	Not significant
group_20421	peptidylprolyl isomerase PrsA;Foldase protein PrsA;hypothetical protein	11	4	44	41	0.162352	2.38327	1.25294	0.2	0.0888889	0.111111	0.440452	Not significant	Not significant
group_20422	Formate/nitrite transporter	11	4	44	41	0.162352	2.38327	1.25294	0.2	0.0888889	0.111111	0.440452	Not significant	Not significant
group_20441	hypothetical protein;Pentapeptide MXKDX repeat protein	11	4	44	41	0.162352	2.38327	1.25294	0.2	0.0888889	0.111111	0.440452	Not significant	Not significant
group_20442	bifunctional methionine sulfoxide reductase B/A protein;peptide-methionine (S)-S-oxide reductase;peptide-methionine (R)-S-oxide reductase	11	4	44	41	0.162352	2.38327	1.25294	0.2	0.0888889	0.111111	0.440452	Not significant	Not significant
group_20561	dephospho-CoA kinase	11	4	44	41	0.162352	2.38327	1.25294	0.2	0.0888889	0.111111	0.440452	Not significant	Not significant
group_20600	hypothetical protein;LysM domain-containing protein;SAG1386/EF1546 family surface-associated protein	11	4	44	41	0.162352	2.38327	1.25294	0.2	0.0888889	0.111111	0.440452	Not significant	Not significant
group_2065	Integral membrane protein receptor;BAX inhibitor (BI)-1/YccA family protein	11	4	44	41	0.162352	2.38327	1.25294	0.2	0.0888889	0.111111	0.440452	Not significant	Not significant
group_20662	ABC transporter-like protein;ABC transporter ATP-binding protein	11	4	44	41	0.162352	2.38327	1.25294	0.2	0.0888889	0.111111	0.440452	Not significant	Not significant
group_20674	Tetratricopeptide repeat protein;hypothetical protein;TPR repeat-containing protein;tetratricopeptide repeat protein	11	4	44	41	0.162352	2.38327	1.25294	0.2	0.0888889	0.111111	0.440452	Not significant	Not significant
group_20681	D-alanyl-lipoteichoic acid biosynthesis protein DltD;hypothetical protein	11	4	44	41	0.162352	2.38327	1.25294	0.2	0.0888889	0.111111	0.440452	Not significant	Not significant
group_20719	DUF2974 domain-containing protein;Lipase	11	4	44	41	0.162352	2.38327	1.25294	0.2	0.0888889	0.111111	0.440452	Not significant	Not significant
group_20739	alpha amylase C-terminal domain-containing protein;Glucohydrolase;Alpha amylase catalytic domain protein;Glycosyl hydrolase family 13 catalytic domain-containing protein;alpha-amylase family glycosyl hydrolase	11	4	44	41	0.162352	2.38327	1.25294	0.2	0.0888889	0.111111	0.440452	Not significant	Not significant
group_20764	Galactose-1-phosphate uridylyltransferase;UDP-glucose--hexose-1-phosphate uridylyltransferase	11	4	44	41	0.162352	2.38327	1.25294	0.2	0.0888889	0.111111	0.440452	Not significant	Not significant
group_20777	Inositol monophosphatase family protein	11	4	44	41	0.162352	2.38327	1.25294	0.2	0.0888889	0.111111	0.440452	Not significant	Not significant
group_20811	ATP synthase F0 A subunit;hypothetical protein;Beta-carotene 1515'-monooxygenase;DUF6688 domain-containing protein;Putative membrane protein	11	4	44	41	0.162352	2.38327	1.25294	0.2	0.0888889	0.111111	0.440452	Not significant	Not significant
group_20820	Response regulatory domain-containing protein;AraC family transcriptional regulator	11	4	44	41	0.162352	2.38327	1.25294	0.2	0.0888889	0.111111	0.440452	Not significant	Not significant
group_20826	ABC transporter membrane protein;ABC3 transporter permease protein domain-containing protein	11	4	44	41	0.162352	2.38327	1.25294	0.2	0.0888889	0.111111	0.440452	Not significant	Not significant
group_20891	DUF1129 domain-containing protein;hypothetical protein	11	4	44	41	0.162352	2.38327	1.25294	0.2	0.0888889	0.111111	0.440452	Not significant	Not significant
group_20896	Helicase	11	4	44	41	0.162352	2.38327	1.25294	0.2	0.0888889	0.111111	0.440452	Not significant	Not significant
group_20910	DNA polymerase III subunit delta;DNA polymerase III delta subunit	11	4	44	41	0.162352	2.38327	1.25294	0.2	0.0888889	0.111111	0.440452	Not significant	Not significant
group_20932	Aldose 1-epimerase	11	4	44	41	0.162352	2.38327	1.25294	0.2	0.0888889	0.111111	0.440452	Not significant	Not significant
group_20954	6-phosphogluconolactonase	11	4	44	41	0.162352	2.38327	1.25294	0.2	0.0888889	0.111111	0.440452	Not significant	Not significant
group_20961	Serine/alanine racemase;acyltransferase;Acyltransferase 3 domain-containing protein;hypothetical protein	11	4	44	41	0.162352	2.38327	1.25294	0.2	0.0888889	0.111111	0.440452	Not significant	Not significant
group_20962	glucosamine-6-phosphate deaminase;Glucosamine-6-phosphate deaminase	11	4	44	41	0.162352	2.38327	1.25294	0.2	0.0888889	0.111111	0.440452	Not significant	Not significant
group_20982	farnesyl diphosphate synthase	11	4	44	41	0.162352	2.38327	1.25294	0.2	0.0888889	0.111111	0.440452	Not significant	Not significant
group_21003	Alanine aminotransferase	11	4	44	41	0.162352	2.38327	1.25294	0.2	0.0888889	0.111111	0.440452	Not significant	Not significant
group_21023	bifunctional riboflavin kinase/FAD synthetase	11	4	44	41	0.162352	2.38327	1.25294	0.2	0.0888889	0.111111	0.440452	Not significant	Not significant
group_21047	HAMP domain-containing protein;Sensor histidine kinase YesM;sensor histidine kinase;hypothetical protein	11	4	44	41	0.162352	2.38327	1.25294	0.2	0.0888889	0.111111	0.440452	Not significant	Not significant
group_21074	HTH-type transcriptional regulator RpiR;SIS domain-containing protein;SIS domain protein	11	4	44	41	0.162352	2.38327	1.25294	0.2	0.0888889	0.111111	0.440452	Not significant	Not significant
group_21135	aminodeoxychorismate synthase component I	11	4	44	41	0.162352	2.38327	1.25294	0.2	0.0888889	0.111111	0.440452	Not significant	Not significant
group_21136	D-alanyl-D-alanine carboxypeptidase;Serine-type D-Ala-D-Ala carboxypeptidase;Peptidase S11 D-alanyl-D-alanine carboxypeptidase A N-terminal domain-containing protein	11	4	44	41	0.162352	2.38327	1.25294	0.2	0.0888889	0.111111	0.440452	Not significant	Not significant
group_21145	DNA mismatch repair proteins mutS family domain-containing protein	11	4	44	41	0.162352	2.38327	1.25294	0.2	0.0888889	0.111111	0.440452	Not significant	Not significant
group_21179	tRNA (Adenine22-N1)-methyltransferase	11	4	44	41	0.162352	2.38327	1.25294	0.2	0.0888889	0.111111	0.440452	Not significant	Not significant
group_21201	histidine phosphatase family protein;Phosphoglycerate mutase;Phosphoserine phosphatase 1;hypothetical protein;Phosphoglycerate mutase family 5;Histidine phosphatase family protein	11	4	44	41	0.162352	2.38327	1.25294	0.2	0.0888889	0.111111	0.440452	Not significant	Not significant
group_21246	Acyl-CoA thioester hydrolase;alpha/beta hydrolase;2-succinyl-6-hydroxy-2 4-cyclohexadiene-1-carboxylate synthase;Serine aminopeptidase S33 domain-containing protein	11	4	44	41	0.162352	2.38327	1.25294	0.2	0.0888889	0.111111	0.440452	Not significant	Not significant
group_21247	MFS transporter;Major facilitator superfamily sugar transporter;hypothetical protein;Major facilitator superfamily (MFS) profile domain-containing protein	11	4	44	41	0.162352	2.38327	1.25294	0.2	0.0888889	0.111111	0.440452	Not significant	Not significant
group_21253	CapA family protein;Bacterial capsule synthesis protein;Capsule synthesis protein CapA domain-containing protein;Poly-gamma-glutamate biosynthesis protein	11	4	44	41	0.162352	2.38327	1.25294	0.2	0.0888889	0.111111	0.440452	Not significant	Not significant
group_21278	Solute-binding protein family 5 domain-containing protein;Peptide ABC transporter ATP-binding protein	11	4	44	41	0.162352	2.38327	1.25294	0.2	0.0888889	0.111111	0.440452	Not significant	Not significant
group_21334	adenosine deaminase;Adenosine deaminase;hypothetical protein	11	4	44	41	0.162352	2.38327	1.25294	0.2	0.0888889	0.111111	0.440452	Not significant	Not significant
group_21387	Peptide ABC transporter ATP-binding protein;Solute-binding protein family 5 domain-containing protein;hypothetical protein	11	4	44	41	0.162352	2.38327	1.25294	0.2	0.0888889	0.111111	0.440452	Not significant	Not significant
group_21481	hypothetical protein;Alpha/beta hydrolase	11	4	44	41	0.162352	2.38327	1.25294	0.2	0.0888889	0.111111	0.440452	Not significant	Not significant
group_21485	F0F1 ATP synthase subunit delta	11	4	44	41	0.162352	2.38327	1.25294	0.2	0.0888889	0.111111	0.440452	Not significant	Not significant
group_21499	DNA-directed RNA polymerase subunit beta	11	4	44	41	0.162352	2.38327	1.25294	0.2	0.0888889	0.111111	0.440452	Not significant	Not significant
group_2151	Transporter major facilitator domain protein;Major facilitator family transporter;hypothetical protein;Major facilitator superfamily (MFS) profile domain-containing protein	11	4	44	41	0.162352	2.38327	1.25294	0.2	0.0888889	0.111111	0.440452	Not significant	Not significant
group_21564	RNA-binding cell elongation regulator Jag/EloR	11	4	44	41	0.162352	2.38327	1.25294	0.2	0.0888889	0.111111	0.440452	Not significant	Not significant
group_21621	DUF4982 domain-containing protein;Gram-positive signal peptide protein YSIRK family;hypothetical protein;Beta-galactosidase	11	4	44	41	0.162352	2.38327	1.25294	0.2	0.0888889	0.111111	0.440452	Not significant	Not significant
group_21625	Membrane protein insertase YidC;membrane protein insertase YidC;hypothetical protein	11	4	44	41	0.162352	2.38327	1.25294	0.2	0.0888889	0.111111	0.440452	Not significant	Not significant
group_21636	Glycosyltransferase RgtA/B/C/D-like domain-containing protein;hypothetical protein;Putative membrane protein	11	4	44	41	0.162352	2.38327	1.25294	0.2	0.0888889	0.111111	0.440452	Not significant	Not significant
group_21645	Acetyltransferase GNAT family;hypothetical protein;N-acetyltransferase domain-containing protein	11	4	44	41	0.162352	2.38327	1.25294	0.2	0.0888889	0.111111	0.440452	Not significant	Not significant
group_21689	competence type IV pilus ATPase ComGA	11	4	44	41	0.162352	2.38327	1.25294	0.2	0.0888889	0.111111	0.440452	Not significant	Not significant
group_21720	competence type IV pilus assembly protein ComGB;hypothetical protein;type II secretion system F family protein	11	4	44	41	0.162352	2.38327	1.25294	0.2	0.0888889	0.111111	0.440452	Not significant	Not significant
group_21749	Transcriptional activator Rgg/GadR/MutR family domain-containing protein;Positive transcriptional regulator MutRfamily;Transcriptional activator Rgg/GadR/MutR family domain protein	11	4	44	41	0.162352	2.38327	1.25294	0.2	0.0888889	0.111111	0.440452	Not significant	Not significant
group_21761	competence type IV pilus major pilin ComGC	11	4	44	41	0.162352	2.38327	1.25294	0.2	0.0888889	0.111111	0.440452	Not significant	Not significant
group_218	DUF6287 domain-containing protein;hypothetical protein;Lipoprotein	11	4	44	41	0.162352	2.38327	1.25294	0.2	0.0888889	0.111111	0.440452	Not significant	Not significant
group_2385	Thiamine transporter HmpT;ECF transporter S component	11	4	44	41	0.162352	2.38327	1.25294	0.2	0.0888889	0.111111	0.440452	Not significant	Not significant
group_2492	site-specific tyrosine recombinase XerD	11	4	44	41	0.162352	2.38327	1.25294	0.2	0.0888889	0.111111	0.440452	Not significant	Not significant
group_250	Class I SAM-dependent methyltransferase;Ubiquinone biosynthesis O-methyltransferase;Methyltransferase type 11 domain-containing protein;methyltransferase domain-containing protein	11	4	44	41	0.162352	2.38327	1.25294	0.2	0.0888889	0.111111	0.440452	Not significant	Not significant
group_2563	Cation transport protein;Trk transporter membrane-spanning protein;TrkH family potassium uptake protein	11	4	44	41	0.162352	2.38327	1.25294	0.2	0.0888889	0.111111	0.440452	Not significant	Not significant
group_2594	Trk system potassium transporter TrkA;TrkA C-terminal domain-containing protein	11	4	44	41	0.162352	2.38327	1.25294	0.2	0.0888889	0.111111	0.440452	Not significant	Not significant
group_2819	alpha-amylase;Glycosyl hydrolase family 13 catalytic domain-containing protein;Cytoplasmic alpha-amylase	11	4	44	41	0.162352	2.38327	1.25294	0.2	0.0888889	0.111111	0.440452	Not significant	Not significant
group_2824	Peptidase M20/M25/M40 family;M20/M25/M40 family metallo-hydrolase;Peptidase M20;Peptidase M20 dimerisation domain-containing protein	11	4	44	41	0.162352	2.38327	1.25294	0.2	0.0888889	0.111111	0.440452	Not significant	Not significant
group_355	DUF4430 domain-containing protein	11	4	44	41	0.162352	2.38327	1.25294	0.2	0.0888889	0.111111	0.440452	Not significant	Not significant
group_492	DUF4044 domain-containing protein	11	4	44	41	0.162352	2.38327	1.25294	0.2	0.0888889	0.111111	0.440452	Not significant	Not significant
group_589	YolD-like protein	11	4	44	41	0.162352	2.38327	1.25294	0.2	0.0888889	0.111111	0.440452	Not significant	Not significant
group_764	LytR family transcriptional regulator;Transcriptional regulator;Cell envelope-related transcriptional attenuator domain-containing protein	11	4	44	41	0.162352	2.38327	1.25294	0.2	0.0888889	0.111111	0.440452	Not significant	Not significant
group_840	DUF1836 domain-containing protein;BS_ykrK family protein	11	4	44	41	0.162352	2.38327	1.25294	0.2	0.0888889	0.111111	0.440452	Not significant	Not significant
group_939	Channel protein hemolysin III family;Hemolysin III family channel protein	11	4	44	41	0.162352	2.38327	1.25294	0.2	0.0888889	0.111111	0.440452	Not significant	Not significant
group_977	Amino acid ABC transporter;Amino acid transporter AAT family	11	4	44	41	0.162352	2.38327	1.25294	0.2	0.0888889	0.111111	0.440452	Not significant	Not significant
malA	Maltodextrose utilization protein MalA	11	4	44	41	0.162352	2.38327	1.25294	0.2	0.0888889	0.111111	0.440452	Not significant	Not significant
mapZ	Mid-cell-anchored protein Z;MapZ extracellular C-terminal domain-containing protein	11	4	44	41	0.162352	2.38327	1.25294	0.2	0.0888889	0.111111	0.440452	Not significant	Not significant
marR	MarR family transcriptional regulator;HTH marR-type domain-containing protein	11	4	44	41	0.162352	2.38327	1.25294	0.2	0.0888889	0.111111	0.440452	Not significant	Not significant
mvaD	diphosphomevalonate decarboxylase;hypothetical protein;Putative diphosphomevalonate decarboxylase	11	4	44	41	0.162352	2.38327	1.25294	0.2	0.0888889	0.111111	0.440452	Not significant	Not significant
mvk	mevalonate kinase	11	4	44	41	0.162352	2.38327	1.25294	0.2	0.0888889	0.111111	0.440452	Not significant	Not significant
prsW	PrsW family intramembrane metalloprotease	11	4	44	41	0.162352	2.38327	1.25294	0.2	0.0888889	0.111111	0.440452	Not significant	Not significant
rnpA	ribonuclease P protein component	11	4	44	41	0.162352	2.38327	1.25294	0.2	0.0888889	0.111111	0.440452	Not significant	Not significant
tlpA	TlpA family protein disulfide reductase;Thioredoxin domain-containing protein;Redoxin domain-containing protein	11	4	44	41	0.162352	2.38327	1.25294	0.2	0.0888889	0.111111	0.440452	Not significant	Not significant
vanZ	VanZF-like protein;VanZ-like domain-containing protein;VanZ like family protein;VanZ-like protein	11	4	44	41	0.162352	2.38327	1.25294	0.2	0.0888889	0.111111	0.440452	Not significant	Not significant
yfiB	ABC transporter transmembrane domain-containing protein;ABC transporter ATP-binding protein/permease;ABC transporter ATP-binding protein yfiB;ABC transporter ATP-binding protein	11	4	44	41	0.162352	2.38327	1.25294	0.2	0.0888889	0.111111	0.440452	Not significant	Not significant
yheH~~~tetB46	Putative multidrug resistance ABC transporter ATP-binding/permease protein YheH;tetracycline efflux ABC transporter Tet(46) subunit B	11	4	44	41	0.162352	2.38327	1.25294	0.2	0.0888889	0.111111	0.440452	Not significant	Not significant
yhiN	NAD(P)/FAD-dependent oxidoreductase;putative flavoprotein YhiN;Monomeric sarcosine oxidase	11	4	44	41	0.162352	2.38327	1.25294	0.2	0.0888889	0.111111	0.440452	Not significant	Not significant
yicL~~~eamA	Putative inner membrane transporter YicL;DMT superfamily drug/metabolite transporter;EamA domain-containing protein	11	4	44	41	0.162352	2.38327	1.25294	0.2	0.0888889	0.111111	0.440452	Not significant	Not significant
ylmA	Putative ABC transporter ATP-binding protein YlmA;ABC transporter ATP-binding domain protein;ABC transporter domain-containing protein	11	4	44	41	0.162352	2.38327	1.25294	0.2	0.0888889	0.111111	0.440452	Not significant	Not significant
yneF	YneF family protein;Uncharacterised protein family (UPF0154)	11	4	44	41	0.162352	2.38327	1.25294	0.2	0.0888889	0.111111	0.440452	Not significant	Not significant
yqjI~~~padR	Transcriptional regulator YqjI;Transcriptional regulator;Transcription regulator PadR N-terminal domain-containing protein;PadR family transcriptional regulator	25	27	30	18	0.164163	0.562444	-0.830218	0.454545	0.6	-0.145455	0.440452	Not significant	Not significant
group_1235	Type I restriction enzyme endonuclease subunit;Type I restriction endonuclease subunit R;Type I restriction-modification system restriction subunit R;type I site-specific deoxyribonuclease	17	8	38	37	0.16605	2.00535	1.00385	0.309091	0.177778	0.131313	0.440452	Not significant	Not significant
group_18280	glucose-6-phosphate isomerase	17	8	38	37	0.16605	2.00535	1.00385	0.309091	0.177778	0.131313	0.440452	Not significant	Not significant
group_2166	DUF262 domain-containing protein;HNH endonuclease family protein	17	8	38	37	0.16605	2.00535	1.00385	0.309091	0.177778	0.131313	0.440452	Not significant	Not significant
group_2327	DUF262 domain-containing protein;hypothetical protein	17	8	38	37	0.16605	2.00535	1.00385	0.309091	0.177778	0.131313	0.440452	Not significant	Not significant
wchO	Glycosyltransferase;UDP-N-acetyl-D-mannosamine transferase wchO;Glycosyl transferase WecB/TagA/CpsF family protein;Glycosyltransferase WecB/TagA/CpsF family	17	8	38	37	0.16605	2.00535	1.00385	0.309091	0.177778	0.131313	0.440452	Not significant	Not significant
ytfG~~~nmrA	Quinone oxidoreductase 2;hypothetical protein;Uncharacterized oxidoreductase ytfG;NmrA family protein;NmrA-like domain-containing protein;NAD(P)-binding domain-containing protein	17	8	38	37	0.16605	2.00535	1.00385	0.309091	0.177778	0.131313	0.440452	Not significant	Not significant
group_18345	Peptide ABC transporter ATP-binding protein;ABC transporter substrate-binding protein family 5;hypothetical protein;Oligopeptide ABC transporter binding protein;Oligopeptide ABC transporter periplasmic oligopeptide-binding protein OppA	11	15	44	30	0.170155	0.508518	-0.97563	0.2	0.333333	-0.133333	0.440452	Not significant	Not significant
group_1924	transposase;Transposase IS204/IS1001/IS1096/IS1165 DDE domain-containing protein;Transposase;ISL3 family ISSg1 transposase;Ribonuclease III	11	15	44	30	0.170155	0.508518	-0.97563	0.2	0.333333	-0.133333	0.440452	Not significant	Not significant
group_21148	ABC transporter ATP-binding protein;ABC-2 family transporter protein;ABC transporter permease;ABC transporter ATP-binding family protein	11	15	44	30	0.170155	0.508518	-0.97563	0.2	0.333333	-0.133333	0.440452	Not significant	Not significant
group_1026	HTH-type transcriptional regulator PuuR;DNA-binding helix-turn-helix protein;Putative transcriptional regulator	1	4	54	41	0.17128	0.253823	-1.97811	0.0181818	0.0888889	-0.0707071	0.440452	Not significant	Not significant
group_11197	CRISPR system Cms protein Csm2	1	4	54	41	0.17128	0.253823	-1.97811	0.0181818	0.0888889	-0.0707071	0.440452	Not significant	Not significant
group_1166	WXG superfamily LXG domain protein;Transposase;Ribonuclease	1	4	54	41	0.17128	0.253823	-1.97811	0.0181818	0.0888889	-0.0707071	0.440452	Not significant	Not significant
group_12501	Permease	1	4	54	41	0.17128	0.253823	-1.97811	0.0181818	0.0888889	-0.0707071	0.440452	Not significant	Not significant
group_1306	Replication initiator protein A;Replication initiator A N-terminal domain-containing protein	1	4	54	41	0.17128	0.253823	-1.97811	0.0181818	0.0888889	-0.0707071	0.440452	Not significant	Not significant
group_14828	DUF4044 domain-containing protein	1	4	54	41	0.17128	0.253823	-1.97811	0.0181818	0.0888889	-0.0707071	0.440452	Not significant	Not significant
group_15708	hypothetical protein;Peptidase C39-like domain-containing protein	1	4	54	41	0.17128	0.253823	-1.97811	0.0181818	0.0888889	-0.0707071	0.440452	Not significant	Not significant
group_15775	Glycosyltransferase 2-like domain-containing protein;hypothetical protein;Putative glycosyltransferase EpsJ	1	4	54	41	0.17128	0.253823	-1.97811	0.0181818	0.0888889	-0.0707071	0.440452	Not significant	Not significant
group_15847	hypothetical protein;Mutacin ABC transporter protein MutE	1	4	54	41	0.17128	0.253823	-1.97811	0.0181818	0.0888889	-0.0707071	0.440452	Not significant	Not significant
group_15864	histidine kinase	1	4	54	41	0.17128	0.253823	-1.97811	0.0181818	0.0888889	-0.0707071	0.440452	Not significant	Not significant
group_16000	Aminoglycoside phosphotransferase domain-containing protein	1	4	54	41	0.17128	0.253823	-1.97811	0.0181818	0.0888889	-0.0707071	0.440452	Not significant	Not significant
group_16272	hypothetical protein	1	4	54	41	0.17128	0.253823	-1.97811	0.0181818	0.0888889	-0.0707071	0.440452	Not significant	Not significant
group_16558	Malate Na(+) symporter;CCS family citrate:sodium (Na+) symporter	1	4	54	41	0.17128	0.253823	-1.97811	0.0181818	0.0888889	-0.0707071	0.440452	Not significant	Not significant
group_16694	Integrative and conjugative element protein	1	4	54	41	0.17128	0.253823	-1.97811	0.0181818	0.0888889	-0.0707071	0.440452	Not significant	Not significant
group_16828	Maltose O-acetyltransferase	1	4	54	41	0.17128	0.253823	-1.97811	0.0181818	0.0888889	-0.0707071	0.440452	Not significant	Not significant
group_16906	Peptidase C39-like domain-containing protein	1	4	54	41	0.17128	0.253823	-1.97811	0.0181818	0.0888889	-0.0707071	0.440452	Not significant	Not significant
group_16969	ABC transporter ATP-binding protein	1	4	54	41	0.17128	0.253823	-1.97811	0.0181818	0.0888889	-0.0707071	0.440452	Not significant	Not significant
group_172	Replication initiator A N-terminal domain-containing protein	1	4	54	41	0.17128	0.253823	-1.97811	0.0181818	0.0888889	-0.0707071	0.440452	Not significant	Not significant
group_17311	Lipoprotein	1	4	54	41	0.17128	0.253823	-1.97811	0.0181818	0.0888889	-0.0707071	0.440452	Not significant	Not significant
group_17447	type III-A CRISPR-associated RAMP protein Csm4	1	4	54	41	0.17128	0.253823	-1.97811	0.0181818	0.0888889	-0.0707071	0.440452	Not significant	Not significant
group_17449	Antibiotic ABC transporter protein MutG	1	4	54	41	0.17128	0.253823	-1.97811	0.0181818	0.0888889	-0.0707071	0.440452	Not significant	Not significant
group_17744	CRISPR-associated protein Csm1 family;type III-A CRISPR-associated protein Cas10/Csm1	1	4	54	41	0.17128	0.253823	-1.97811	0.0181818	0.0888889	-0.0707071	0.440452	Not significant	Not significant
group_18082	ABC transporter domain-containing protein	1	4	54	41	0.17128	0.253823	-1.97811	0.0181818	0.0888889	-0.0707071	0.440452	Not significant	Not significant
group_18136	Bacteriocin	1	4	54	41	0.17128	0.253823	-1.97811	0.0181818	0.0888889	-0.0707071	0.440452	Not significant	Not significant
group_18167	Serine/threonine protein phosphatase family protein;putative phosphodiesterase calcineurin family;Ser/Thr protein phosphatase family protein	1	4	54	41	0.17128	0.253823	-1.97811	0.0181818	0.0888889	-0.0707071	0.440452	Not significant	Not significant
group_18182	hypothetical protein	1	4	54	41	0.17128	0.253823	-1.97811	0.0181818	0.0888889	-0.0707071	0.440452	Not significant	Not significant
group_18183	hypothetical protein	1	4	54	41	0.17128	0.253823	-1.97811	0.0181818	0.0888889	-0.0707071	0.440452	Not significant	Not significant
group_18408	Site-specific DNA recombinase SpoIVCA/DNA invertase PinE	1	4	54	41	0.17128	0.253823	-1.97811	0.0181818	0.0888889	-0.0707071	0.440452	Not significant	Not significant
group_18626	type III-A CRISPR-associated CARF protein Csm6	1	4	54	41	0.17128	0.253823	-1.97811	0.0181818	0.0888889	-0.0707071	0.440452	Not significant	Not significant
group_18849	DUF2142 domain-containing protein	1	4	54	41	0.17128	0.253823	-1.97811	0.0181818	0.0888889	-0.0707071	0.440452	Not significant	Not significant
group_18989	type III-A CRISPR-associated RAMP protein Csm5	1	4	54	41	0.17128	0.253823	-1.97811	0.0181818	0.0888889	-0.0707071	0.440452	Not significant	Not significant
group_19095	hypothetical protein	1	4	54	41	0.17128	0.253823	-1.97811	0.0181818	0.0888889	-0.0707071	0.440452	Not significant	Not significant
group_19156	CRISPR-associated endoribonuclease Cas6	1	4	54	41	0.17128	0.253823	-1.97811	0.0181818	0.0888889	-0.0707071	0.440452	Not significant	Not significant
group_19529	Transposon-encoded protein TnpW;Chorismate synthase	1	4	54	41	0.17128	0.253823	-1.97811	0.0181818	0.0888889	-0.0707071	0.440452	Not significant	Not significant
group_19679	hypothetical protein;CRISPR-associated protein Csm6	1	4	54	41	0.17128	0.253823	-1.97811	0.0181818	0.0888889	-0.0707071	0.440452	Not significant	Not significant
group_19680	CRISPR-associated endonuclease Cas1	1	4	54	41	0.17128	0.253823	-1.97811	0.0181818	0.0888889	-0.0707071	0.440452	Not significant	Not significant
group_19702	67-dimethyl-8-ribityllumazine synthase	1	4	54	41	0.17128	0.253823	-1.97811	0.0181818	0.0888889	-0.0707071	0.440452	Not significant	Not significant
group_19809	ABC-type glycerol-3-phosphate transport system periplasmic component;Sugar ABC superfamily ATP binding cassette transporter binding protein	1	4	54	41	0.17128	0.253823	-1.97811	0.0181818	0.0888889	-0.0707071	0.440452	Not significant	Not significant
group_19816	Glycosyl transferase family 1 domain-containing protein	1	4	54	41	0.17128	0.253823	-1.97811	0.0181818	0.0888889	-0.0707071	0.440452	Not significant	Not significant
group_19835	YopX protein domain-containing protein;hypothetical protein	1	4	54	41	0.17128	0.253823	-1.97811	0.0181818	0.0888889	-0.0707071	0.440452	Not significant	Not significant
group_20006	CRISPR-associated endonuclease Cas2	1	4	54	41	0.17128	0.253823	-1.97811	0.0181818	0.0888889	-0.0707071	0.440452	Not significant	Not significant
group_20013	Transposase;LXG domain-containing protein	1	4	54	41	0.17128	0.253823	-1.97811	0.0181818	0.0888889	-0.0707071	0.440452	Not significant	Not significant
group_20228	DNA replication protein DnaC	1	4	54	41	0.17128	0.253823	-1.97811	0.0181818	0.0888889	-0.0707071	0.440452	Not significant	Not significant
group_20425	Toprim;LPD25 domain-containing protein	1	4	54	41	0.17128	0.253823	-1.97811	0.0181818	0.0888889	-0.0707071	0.440452	Not significant	Not significant
group_20592	DUF6287 domain-containing protein	1	4	54	41	0.17128	0.253823	-1.97811	0.0181818	0.0888889	-0.0707071	0.440452	Not significant	Not significant
group_2063	Glycerate kinase;Phage-related chromosomal island protein	1	4	54	41	0.17128	0.253823	-1.97811	0.0181818	0.0888889	-0.0707071	0.440452	Not significant	Not significant
group_20678	Phage replisome organizer putative N-terminal region;Phage replisome organiser N-terminal domain-containing protein	1	4	54	41	0.17128	0.253823	-1.97811	0.0181818	0.0888889	-0.0707071	0.440452	Not significant	Not significant
group_20952	hypothetical protein	1	4	54	41	0.17128	0.253823	-1.97811	0.0181818	0.0888889	-0.0707071	0.440452	Not significant	Not significant
group_20958	MobA/VirD2-like nuclease domain-containing protein	1	4	54	41	0.17128	0.253823	-1.97811	0.0181818	0.0888889	-0.0707071	0.440452	Not significant	Not significant
group_21018	Ltp family lipoprotein;Putative endo-beta-N-acetylglucosaminidase	1	4	54	41	0.17128	0.253823	-1.97811	0.0181818	0.0888889	-0.0707071	0.440452	Not significant	Not significant
group_21133	Bacterial mobilisation domain-containing protein;mobilization protein	1	4	54	41	0.17128	0.253823	-1.97811	0.0181818	0.0888889	-0.0707071	0.440452	Not significant	Not significant
group_21571	Phosphoglycerol transferase;VanZ family protein	1	4	54	41	0.17128	0.253823	-1.97811	0.0181818	0.0888889	-0.0707071	0.440452	Not significant	Not significant
group_21778	Bacteriocin immunity protein;hypothetical protein;Group-specific protein	1	4	54	41	0.17128	0.253823	-1.97811	0.0181818	0.0888889	-0.0707071	0.440452	Not significant	Not significant
group_22039	Cell surface protein	1	4	54	41	0.17128	0.253823	-1.97811	0.0181818	0.0888889	-0.0707071	0.440452	Not significant	Not significant
group_2648	IS30 family transposase	1	4	54	41	0.17128	0.253823	-1.97811	0.0181818	0.0888889	-0.0707071	0.440452	Not significant	Not significant
group_2908	Glyoxalase;Asparaginyl-tRNA synthetase	1	4	54	41	0.17128	0.253823	-1.97811	0.0181818	0.0888889	-0.0707071	0.440452	Not significant	Not significant
group_2984	DNA-binding helix-turn-helix protein;HTH cro/C1-type domain-containing protein	1	4	54	41	0.17128	0.253823	-1.97811	0.0181818	0.0888889	-0.0707071	0.440452	Not significant	Not significant
group_3292	Carboxylic ester hydrolase	1	4	54	41	0.17128	0.253823	-1.97811	0.0181818	0.0888889	-0.0707071	0.440452	Not significant	Not significant
group_3418	malolactic enzyme	1	4	54	41	0.17128	0.253823	-1.97811	0.0181818	0.0888889	-0.0707071	0.440452	Not significant	Not significant
group_4836	Lipoprotein	1	4	54	41	0.17128	0.253823	-1.97811	0.0181818	0.0888889	-0.0707071	0.440452	Not significant	Not significant
group_4887	ICESt1 ORFD ATP/GTP-binding protein	1	4	54	41	0.17128	0.253823	-1.97811	0.0181818	0.0888889	-0.0707071	0.440452	Not significant	Not significant
group_646	DUF1310 domain-containing protein	1	4	54	41	0.17128	0.253823	-1.97811	0.0181818	0.0888889	-0.0707071	0.440452	Not significant	Not significant
group_658	ABC transporter permease;Conserved domain protein	1	4	54	41	0.17128	0.253823	-1.97811	0.0181818	0.0888889	-0.0707071	0.440452	Not significant	Not significant
group_6988	Phage tail protein	1	4	54	41	0.17128	0.253823	-1.97811	0.0181818	0.0888889	-0.0707071	0.440452	Not significant	Not significant
group_7199	Phage protein	1	4	54	41	0.17128	0.253823	-1.97811	0.0181818	0.0888889	-0.0707071	0.440452	Not significant	Not significant
group_8135	type III-A CRISPR-associated RAMP protein Csm3	1	4	54	41	0.17128	0.253823	-1.97811	0.0181818	0.0888889	-0.0707071	0.440452	Not significant	Not significant
group_8669	hypothetical protein	1	4	54	41	0.17128	0.253823	-1.97811	0.0181818	0.0888889	-0.0707071	0.440452	Not significant	Not significant
ribA	bifunctional 34-dihydroxy-2-butanone-4-phosphate synthase/GTP cyclohydrolase II;hypothetical protein	1	4	54	41	0.17128	0.253823	-1.97811	0.0181818	0.0888889	-0.0707071	0.440452	Not significant	Not significant
ribD	bifunctional diaminohydroxyphosphoribosylaminopyrimidine deaminase/5-amino-6-(5-phosphoribosylamino)uracil reductase RibD	1	4	54	41	0.17128	0.253823	-1.97811	0.0181818	0.0888889	-0.0707071	0.440452	Not significant	Not significant
ribE	riboflavin synthase	1	4	54	41	0.17128	0.253823	-1.97811	0.0181818	0.0888889	-0.0707071	0.440452	Not significant	Not significant
spaR	Response regulator SpaR	1	4	54	41	0.17128	0.253823	-1.97811	0.0181818	0.0888889	-0.0707071	0.440452	Not significant	Not significant
tetW~~~tet32	tetracycline resistance ribosomal protection protein Tet(W);Translation elongation factor EFG/EF2 domain-containing protein;tetracycline resistance ribosomal protection protein Tet(32)	1	4	54	41	0.17128	0.253823	-1.97811	0.0181818	0.0888889	-0.0707071	0.440452	Not significant	Not significant
ubiE	Ubiquinone/menaquinone biosynthesis C-methylase UbiE/MenG	1	4	54	41	0.17128	0.253823	-1.97811	0.0181818	0.0888889	-0.0707071	0.440452	Not significant	Not significant
abrB	AbrB family transcriptional regulator	6	10	49	35	0.171356	0.443963	-1.17149	0.109091	0.222222	-0.113131	0.440452	Not significant	Not significant
group_1182	DNA-cytosine methylase;Cytosine-specific methyltransferase	6	10	49	35	0.171356	0.443963	-1.17149	0.109091	0.222222	-0.113131	0.440452	Not significant	Not significant
group_17044	hypothetical protein	6	10	49	35	0.171356	0.443963	-1.17149	0.109091	0.222222	-0.113131	0.440452	Not significant	Not significant
group_18357	PTS cellobiose transporter subunit IIC;Putative phosphotransferase (PTS) system	6	10	49	35	0.171356	0.443963	-1.17149	0.109091	0.222222	-0.113131	0.440452	Not significant	Not significant
group_21549	Recombinase family protein;Methionyl-tRNA synthetase;recombinase family protein;Resolvase N-terminal domain protein	6	10	49	35	0.171356	0.443963	-1.17149	0.109091	0.222222	-0.113131	0.440452	Not significant	Not significant
aRA1	Aldo/keto reductase related to diketogulonate reductase	8	2	47	43	0.178121	3.11368	1.63862	0.145455	0.0444444	0.10101	0.440452	Not significant	Not significant
aarF	putative protein kinase regulating ubiquinone biosynthesis AarF/ABC1/UbiB family;AarF/ABC1/UbiB kinase family protein	8	2	47	43	0.178121	3.11368	1.63862	0.145455	0.0444444	0.10101	0.440452	Not significant	Not significant
abgB	Metal-dependent amidase/aminoacylase/carboxypeptidase	8	2	47	43	0.178121	3.11368	1.63862	0.145455	0.0444444	0.10101	0.440452	Not significant	Not significant
ampC	CubicO group peptidase beta-lactamase class C family;Beta-lactamase-related domain-containing protein	8	2	47	43	0.178121	3.11368	1.63862	0.145455	0.0444444	0.10101	0.440452	Not significant	Not significant
amt	Ammonium transporter	8	2	47	43	0.178121	3.11368	1.63862	0.145455	0.0444444	0.10101	0.440452	Not significant	Not significant
apbE	FAD:protein FMN transferase ApbE	8	2	47	43	0.178121	3.11368	1.63862	0.145455	0.0444444	0.10101	0.440452	Not significant	Not significant
bceB	Peptide-4 ABC exporter (Pep4E) family substrate binding/membrane-spanning protein;Bacitracin export permease protein BceB	8	2	47	43	0.178121	3.11368	1.63862	0.145455	0.0444444	0.10101	0.440452	Not significant	Not significant
cadA	Cation-transporting P-type ATPase	8	2	47	43	0.178121	3.11368	1.63862	0.145455	0.0444444	0.10101	0.440452	Not significant	Not significant
carB	carbamoyl-phosphate synthase large subunit	8	2	47	43	0.178121	3.11368	1.63862	0.145455	0.0444444	0.10101	0.440452	Not significant	Not significant
clcB	Voltage-gated chloride channel family protein;Voltage-gated ClC-type chloride channel ClcB;Voltage-gated chloride channel	8	2	47	43	0.178121	3.11368	1.63862	0.145455	0.0444444	0.10101	0.440452	Not significant	Not significant
cof	Hydroxymethylpyrimidine pyrophosphatase and other HAD family phosphatases	8	2	47	43	0.178121	3.11368	1.63862	0.145455	0.0444444	0.10101	0.440452	Not significant	Not significant
cofD	Archaeal 2-phospho-L-lactate transferase/Bacterial gluconeogenesis factor CofD/UPF0052 family	8	2	47	43	0.178121	3.11368	1.63862	0.145455	0.0444444	0.10101	0.440452	Not significant	Not significant
comFA~~~comF	Superfamily II DNA/RNA helicase required for DNA uptake (late competence protein);ComF operon protein 1 (ATP-dependent helicase comFA)	8	2	47	43	0.178121	3.11368	1.63862	0.145455	0.0444444	0.10101	0.440452	Not significant	Not significant
comFC	DNA utilization protein ComFC/GntX contains phosphoribosyltransferase domain;Competence protein;Late competence protein	8	2	47	43	0.178121	3.11368	1.63862	0.145455	0.0444444	0.10101	0.440452	Not significant	Not significant
cotS	Thiamine kinase or a related kinase	8	2	47	43	0.178121	3.11368	1.63862	0.145455	0.0444444	0.10101	0.440452	Not significant	Not significant
cppA	CppA protein	8	2	47	43	0.178121	3.11368	1.63862	0.145455	0.0444444	0.10101	0.440452	Not significant	Not significant
cps2a	Anionic cell wall polymer biosynthesis enzyme TagV/TagU LytR-Cps2A-Psr (LCP) family (peptidoglycan teichoic acid transferase)	8	2	47	43	0.178121	3.11368	1.63862	0.145455	0.0444444	0.10101	0.440452	Not significant	Not significant
cps4B	capsular polysaccharide biosynthesis protein Cps4B	8	2	47	43	0.178121	3.11368	1.63862	0.145455	0.0444444	0.10101	0.440452	Not significant	Not significant
der	ribosome biogenesis GTPase Der	8	2	47	43	0.178121	3.11368	1.63862	0.145455	0.0444444	0.10101	0.440452	Not significant	Not significant
dltA	D-alanine--poly(phosphoribitol) ligase subunit DltA	8	2	47	43	0.178121	3.11368	1.63862	0.145455	0.0444444	0.10101	0.440452	Not significant	Not significant
dltC	D-alanine--poly(phosphoribitol) ligase subunit DltC	8	2	47	43	0.178121	3.11368	1.63862	0.145455	0.0444444	0.10101	0.440452	Not significant	Not significant
dnaQ~~~polC	bifunctional DnaQ family exonuclease/ATP-dependent helicase	8	2	47	43	0.178121	3.11368	1.63862	0.145455	0.0444444	0.10101	0.440452	Not significant	Not significant
dppD	ABC-type dipeptide/oligopeptide/nickel transport system ATPase component	8	2	47	43	0.178121	3.11368	1.63862	0.145455	0.0444444	0.10101	0.440452	Not significant	Not significant
fieF	Divalent metal cation (Fe/Co/Zn/Cd) efflux pump	8	2	47	43	0.178121	3.11368	1.63862	0.145455	0.0444444	0.10101	0.440452	Not significant	Not significant
flgJ	Flagellum-specific peptidoglycan hydrolase FlgJ	8	2	47	43	0.178121	3.11368	1.63862	0.145455	0.0444444	0.10101	0.440452	Not significant	Not significant
ftsB	Cell division protein FtsB	8	2	47	43	0.178121	3.11368	1.63862	0.145455	0.0444444	0.10101	0.440452	Not significant	Not significant
ftsE	cell division ATP-binding protein FtsE	8	2	47	43	0.178121	3.11368	1.63862	0.145455	0.0444444	0.10101	0.440452	Not significant	Not significant
glnK	Nitrogen regulatory protein PII	8	2	47	43	0.178121	3.11368	1.63862	0.145455	0.0444444	0.10101	0.440452	Not significant	Not significant
gloB~~~yqgX	Glyoxylase or a related metal-dependent hydrolase beta-lactamase superfamily II;Uncharacterized protein yqgX	8	2	47	43	0.178121	3.11368	1.63862	0.145455	0.0444444	0.10101	0.440452	Not significant	Not significant
gltA	citrate synthase	8	2	47	43	0.178121	3.11368	1.63862	0.145455	0.0444444	0.10101	0.440452	Not significant	Not significant
group_10076	SsrA-binding protein SmpB	8	2	47	43	0.178121	3.11368	1.63862	0.145455	0.0444444	0.10101	0.440452	Not significant	Not significant
group_10107	signal peptidase II	8	2	47	43	0.178121	3.11368	1.63862	0.145455	0.0444444	0.10101	0.440452	Not significant	Not significant
group_10247	DUF1836 domain-containing protein	8	2	47	43	0.178121	3.11368	1.63862	0.145455	0.0444444	0.10101	0.440452	Not significant	Not significant
group_10418	transcription antitermination factor NusB	8	2	47	43	0.178121	3.11368	1.63862	0.145455	0.0444444	0.10101	0.440452	Not significant	Not significant
group_1048	D-alanyl-D-alanine carboxypeptidase;Serine-type D-Ala-D-Ala carboxypeptidase	8	2	47	43	0.178121	3.11368	1.63862	0.145455	0.0444444	0.10101	0.440452	Not significant	Not significant
group_10540	50S ribosomal protein L11	8	2	47	43	0.178121	3.11368	1.63862	0.145455	0.0444444	0.10101	0.440452	Not significant	Not significant
group_1058	Integrase/recombinase phage associated;Transposase from transposon Tn916;Integrase/recombinase;Phage integrase family prophage Sa05;Integrase	8	2	47	43	0.178121	3.11368	1.63862	0.145455	0.0444444	0.10101	0.440452	Not significant	Not significant
group_10639	Purine nucleoside phosphoramidase/Ap4A hydrolase histidine triade (HIT) family	8	2	47	43	0.178121	3.11368	1.63862	0.145455	0.0444444	0.10101	0.440452	Not significant	Not significant
group_10640	Holliday junction resolvase RuvX	8	2	47	43	0.178121	3.11368	1.63862	0.145455	0.0444444	0.10101	0.440452	Not significant	Not significant
group_10938	Uncharacterized conserved protein YoxC contains an MCP-like domain	8	2	47	43	0.178121	3.11368	1.63862	0.145455	0.0444444	0.10101	0.440452	Not significant	Not significant
group_11275	DUF956 domain-containing protein	8	2	47	43	0.178121	3.11368	1.63862	0.145455	0.0444444	0.10101	0.440452	Not significant	Not significant
group_11344	S1 RNA-binding domain-containing protein	8	2	47	43	0.178121	3.11368	1.63862	0.145455	0.0444444	0.10101	0.440452	Not significant	Not significant
group_11552	30S ribosome-binding factor RbfA	8	2	47	43	0.178121	3.11368	1.63862	0.145455	0.0444444	0.10101	0.440452	Not significant	Not significant
group_11555	Integral membrane protein	8	2	47	43	0.178121	3.11368	1.63862	0.145455	0.0444444	0.10101	0.440452	Not significant	Not significant
group_11656	50S ribosomal protein L19	8	2	47	43	0.178121	3.11368	1.63862	0.145455	0.0444444	0.10101	0.440452	Not significant	Not significant
group_11778	YlbF/YmcA family competence regulator	8	2	47	43	0.178121	3.11368	1.63862	0.145455	0.0444444	0.10101	0.440452	Not significant	Not significant
group_11970	competence type IV pilus major pilin ComGC	8	2	47	43	0.178121	3.11368	1.63862	0.145455	0.0444444	0.10101	0.440452	Not significant	Not significant
group_12058	DNA replication initiation control protein YabA	8	2	47	43	0.178121	3.11368	1.63862	0.145455	0.0444444	0.10101	0.440452	Not significant	Not significant
group_12156	50S ribosomal protein L21	8	2	47	43	0.178121	3.11368	1.63862	0.145455	0.0444444	0.10101	0.440452	Not significant	Not significant
group_12277	UPF0473 protein M6_Spy1794	8	2	47	43	0.178121	3.11368	1.63862	0.145455	0.0444444	0.10101	0.440452	Not significant	Not significant
group_12318	Ribose 5-phosphate isomerase	8	2	47	43	0.178121	3.11368	1.63862	0.145455	0.0444444	0.10101	0.440452	Not significant	Not significant
group_12489	50S ribosomal protein L27	8	2	47	43	0.178121	3.11368	1.63862	0.145455	0.0444444	0.10101	0.440452	Not significant	Not significant
group_12698	YlxQ-related RNA-binding protein	8	2	47	43	0.178121	3.11368	1.63862	0.145455	0.0444444	0.10101	0.440452	Not significant	Not significant
group_12741	30S ribosomal protein S16	8	2	47	43	0.178121	3.11368	1.63862	0.145455	0.0444444	0.10101	0.440452	Not significant	Not significant
group_12837	type B 50S ribosomal protein L31	8	2	47	43	0.178121	3.11368	1.63862	0.145455	0.0444444	0.10101	0.440452	Not significant	Not significant
group_12838	IreB family regulatory phosphoprotein	8	2	47	43	0.178121	3.11368	1.63862	0.145455	0.0444444	0.10101	0.440452	Not significant	Not significant
group_13271	preprotein translocase subunit SecG	8	2	47	43	0.178121	3.11368	1.63862	0.145455	0.0444444	0.10101	0.440452	Not significant	Not significant
group_13346	DUF1797 domain-containing protein	8	2	47	43	0.178121	3.11368	1.63862	0.145455	0.0444444	0.10101	0.440452	Not significant	Not significant
group_1361	Uncharacterized membrane protein;DUF1003 domain-containing protein	8	2	47	43	0.178121	3.11368	1.63862	0.145455	0.0444444	0.10101	0.440452	Not significant	Not significant
group_13666	Transcriptional regulator Cro/CI family	8	2	47	43	0.178121	3.11368	1.63862	0.145455	0.0444444	0.10101	0.440452	Not significant	Not significant
group_13884	Extracellular protein	8	2	47	43	0.178121	3.11368	1.63862	0.145455	0.0444444	0.10101	0.440452	Not significant	Not significant
group_13994	DUF951 domain-containing protein	8	2	47	43	0.178121	3.11368	1.63862	0.145455	0.0444444	0.10101	0.440452	Not significant	Not significant
group_14035	Phage protein	8	2	47	43	0.178121	3.11368	1.63862	0.145455	0.0444444	0.10101	0.440452	Not significant	Not significant
group_14212	preprotein translocase subunit SecE	8	2	47	43	0.178121	3.11368	1.63862	0.145455	0.0444444	0.10101	0.440452	Not significant	Not significant
group_14287	Membrane associated protein	8	2	47	43	0.178121	3.11368	1.63862	0.145455	0.0444444	0.10101	0.440452	Not significant	Not significant
group_1439	hypothetical protein	8	2	47	43	0.178121	3.11368	1.63862	0.145455	0.0444444	0.10101	0.440452	Not significant	Not significant
group_14688	50S ribosomal protein L34	8	2	47	43	0.178121	3.11368	1.63862	0.145455	0.0444444	0.10101	0.440452	Not significant	Not significant
group_14721	ABC transporter ATP-binding protein	8	2	47	43	0.178121	3.11368	1.63862	0.145455	0.0444444	0.10101	0.440452	Not significant	Not significant
group_14789	hypothetical protein	8	2	47	43	0.178121	3.11368	1.63862	0.145455	0.0444444	0.10101	0.440452	Not significant	Not significant
group_1502	Phosphopentomutase;PF08002 family protein	8	2	47	43	0.178121	3.11368	1.63862	0.145455	0.0444444	0.10101	0.440452	Not significant	Not significant
group_1512	formate C-acetyltransferase	8	2	47	43	0.178121	3.11368	1.63862	0.145455	0.0444444	0.10101	0.440452	Not significant	Not significant
group_15503	ABC-type amino acid transport system permease component	8	2	47	43	0.178121	3.11368	1.63862	0.145455	0.0444444	0.10101	0.440452	Not significant	Not significant
group_15504	ABC-type amino acid transport system permease component	8	2	47	43	0.178121	3.11368	1.63862	0.145455	0.0444444	0.10101	0.440452	Not significant	Not significant
group_15623	Replication protein	8	2	47	43	0.178121	3.11368	1.63862	0.145455	0.0444444	0.10101	0.440452	Not significant	Not significant
group_15630	DNA topoisomerase (ATP-hydrolyzing) subunit B	8	2	47	43	0.178121	3.11368	1.63862	0.145455	0.0444444	0.10101	0.440452	Not significant	Not significant
group_15637	hypothetical protein;DUF161 DUF2179 domains-containing protein	8	2	47	43	0.178121	3.11368	1.63862	0.145455	0.0444444	0.10101	0.440452	Not significant	Not significant
group_15638	DNA-binding transcriptional regulator of sugar metabolism DeoR/GlpR family	8	2	47	43	0.178121	3.11368	1.63862	0.145455	0.0444444	0.10101	0.440452	Not significant	Not significant
group_15648	GTPase HflX	8	2	47	43	0.178121	3.11368	1.63862	0.145455	0.0444444	0.10101	0.440452	Not significant	Not significant
group_15664	DUF4044 domain-containing protein	8	2	47	43	0.178121	3.11368	1.63862	0.145455	0.0444444	0.10101	0.440452	Not significant	Not significant
group_15691	argininosuccinate lyase	8	2	47	43	0.178121	3.11368	1.63862	0.145455	0.0444444	0.10101	0.440452	Not significant	Not significant
group_15721	DUF4651 domain-containing protein	8	2	47	43	0.178121	3.11368	1.63862	0.145455	0.0444444	0.10101	0.440452	Not significant	Not significant
group_1600	ATP-dependent Clp protease ATP-binding subunit ClpA	8	2	47	43	0.178121	3.11368	1.63862	0.145455	0.0444444	0.10101	0.440452	Not significant	Not significant
group_16319	DUF1033 domain-containing protein	8	2	47	43	0.178121	3.11368	1.63862	0.145455	0.0444444	0.10101	0.440452	Not significant	Not significant
group_16320	penicillin-binding protein PBP1B	8	2	47	43	0.178121	3.11368	1.63862	0.145455	0.0444444	0.10101	0.440452	Not significant	Not significant
group_16323	carbamoyl phosphate synthase small subunit	8	2	47	43	0.178121	3.11368	1.63862	0.145455	0.0444444	0.10101	0.440452	Not significant	Not significant
group_16338	DUF3923 domain-containing protein	8	2	47	43	0.178121	3.11368	1.63862	0.145455	0.0444444	0.10101	0.440452	Not significant	Not significant
group_16343	Glutaredoxin	8	2	47	43	0.178121	3.11368	1.63862	0.145455	0.0444444	0.10101	0.440452	Not significant	Not significant
group_16344	bifunctional UDP-N-acetylglucosamine diphosphorylase/glucosamine-1-phosphate N-acetyltransferase GlmU	8	2	47	43	0.178121	3.11368	1.63862	0.145455	0.0444444	0.10101	0.440452	Not significant	Not significant
group_16351	Endonuclease MutS2	8	2	47	43	0.178121	3.11368	1.63862	0.145455	0.0444444	0.10101	0.440452	Not significant	Not significant
group_16353	Foldase protein PrsA	8	2	47	43	0.178121	3.11368	1.63862	0.145455	0.0444444	0.10101	0.440452	Not significant	Not significant
group_16357	Cytosolic protein	8	2	47	43	0.178121	3.11368	1.63862	0.145455	0.0444444	0.10101	0.440452	Not significant	Not significant
group_16360	PhoU domain-containing protein;phosphate signaling complex protein PhoU	8	2	47	43	0.178121	3.11368	1.63862	0.145455	0.0444444	0.10101	0.440452	Not significant	Not significant
group_16364	Transcriptional regulator DeoR family	8	2	47	43	0.178121	3.11368	1.63862	0.145455	0.0444444	0.10101	0.440452	Not significant	Not significant
group_16366	Sortase A;class A sortase	8	2	47	43	0.178121	3.11368	1.63862	0.145455	0.0444444	0.10101	0.440452	Not significant	Not significant
group_16367	branched-chain amino acid aminotransferase	8	2	47	43	0.178121	3.11368	1.63862	0.145455	0.0444444	0.10101	0.440452	Not significant	Not significant
group_16369	D-alanyl-D-alanine carboxypeptidase PBP3	8	2	47	43	0.178121	3.11368	1.63862	0.145455	0.0444444	0.10101	0.440452	Not significant	Not significant
group_16376	Pseudouridine synthase;Pseudouridine synthase RluA 23S rRNA- or tRNA-specific	8	2	47	43	0.178121	3.11368	1.63862	0.145455	0.0444444	0.10101	0.440452	Not significant	Not significant
group_16378	DNA polymerase IV	8	2	47	43	0.178121	3.11368	1.63862	0.145455	0.0444444	0.10101	0.440452	Not significant	Not significant
group_16379	Na+/alanine symporter	8	2	47	43	0.178121	3.11368	1.63862	0.145455	0.0444444	0.10101	0.440452	Not significant	Not significant
group_16380	O-acetylhomoserine/O-acetylserine sulfhydrylase pyridoxal phosphate-dependent	8	2	47	43	0.178121	3.11368	1.63862	0.145455	0.0444444	0.10101	0.440452	Not significant	Not significant
group_16381	aminopeptidase C	8	2	47	43	0.178121	3.11368	1.63862	0.145455	0.0444444	0.10101	0.440452	Not significant	Not significant
group_16386	8-oxo-dGTP pyrophosphatase MutT and related house-cleaning NTP pyrophosphohydrolases NUDIX family	8	2	47	43	0.178121	3.11368	1.63862	0.145455	0.0444444	0.10101	0.440452	Not significant	Not significant
group_16392	Phage protein	8	2	47	43	0.178121	3.11368	1.63862	0.145455	0.0444444	0.10101	0.440452	Not significant	Not significant
group_16393	copper chaperone CopZ	8	2	47	43	0.178121	3.11368	1.63862	0.145455	0.0444444	0.10101	0.440452	Not significant	Not significant
group_16394	CopY/TcrY family copper transport repressor	8	2	47	43	0.178121	3.11368	1.63862	0.145455	0.0444444	0.10101	0.440452	Not significant	Not significant
group_16398	class Ib ribonucleoside-diphosphate reductase assembly flavoprotein NrdI	8	2	47	43	0.178121	3.11368	1.63862	0.145455	0.0444444	0.10101	0.440452	Not significant	Not significant
group_16399	D-aminoacyl-tRNA deacylase	8	2	47	43	0.178121	3.11368	1.63862	0.145455	0.0444444	0.10101	0.440452	Not significant	Not significant
group_16402	30S ribosomal protein S10	8	2	47	43	0.178121	3.11368	1.63862	0.145455	0.0444444	0.10101	0.440452	Not significant	Not significant
group_16404	ABC-type polar amino acid transport system ATPase component	8	2	47	43	0.178121	3.11368	1.63862	0.145455	0.0444444	0.10101	0.440452	Not significant	Not significant
group_16405	type II CAAX endopeptidase family protein;CPBP family intramembrane metalloprotease	8	2	47	43	0.178121	3.11368	1.63862	0.145455	0.0444444	0.10101	0.440452	Not significant	Not significant
group_16411	DNA-processing protein DprA	8	2	47	43	0.178121	3.11368	1.63862	0.145455	0.0444444	0.10101	0.440452	Not significant	Not significant
group_16412	Phage shock protein PspC (stress-responsive transcriptional regulator);Phage shock protein PspC N-terminal domain-containing protein	8	2	47	43	0.178121	3.11368	1.63862	0.145455	0.0444444	0.10101	0.440452	Not significant	Not significant
group_16436	glycerol-3-phosphate 1-O-acyltransferase PlsY	8	2	47	43	0.178121	3.11368	1.63862	0.145455	0.0444444	0.10101	0.440452	Not significant	Not significant
group_16443	DUF3796 domain-containing protein	8	2	47	43	0.178121	3.11368	1.63862	0.145455	0.0444444	0.10101	0.440452	Not significant	Not significant
group_16444	Immunogenic protein	8	2	47	43	0.178121	3.11368	1.63862	0.145455	0.0444444	0.10101	0.440452	Not significant	Not significant
group_16449	Sugar kinase of the NBD/HSP70 family may contain an N-terminal HTH domain	8	2	47	43	0.178121	3.11368	1.63862	0.145455	0.0444444	0.10101	0.440452	Not significant	Not significant
group_16450	Cyclic di-AMP phosphodiesterase GdpP contains GGDEF-like and DHH domains	8	2	47	43	0.178121	3.11368	1.63862	0.145455	0.0444444	0.10101	0.440452	Not significant	Not significant
group_16452	CCA tRNA nucleotidyltransferase	8	2	47	43	0.178121	3.11368	1.63862	0.145455	0.0444444	0.10101	0.440452	Not significant	Not significant
group_16453	DUF308 domain-containing protein	8	2	47	43	0.178121	3.11368	1.63862	0.145455	0.0444444	0.10101	0.440452	Not significant	Not significant
group_16461	DUF3165 domain-containing protein	8	2	47	43	0.178121	3.11368	1.63862	0.145455	0.0444444	0.10101	0.440452	Not significant	Not significant
group_16462	Sugar kinase of the NBD/HSP70 family may contain an N-terminal HTH domain	8	2	47	43	0.178121	3.11368	1.63862	0.145455	0.0444444	0.10101	0.440452	Not significant	Not significant
group_16465	RIP metalloprotease RseP	8	2	47	43	0.178121	3.11368	1.63862	0.145455	0.0444444	0.10101	0.440452	Not significant	Not significant
group_16482	nucleotide exchange factor GrpE	8	2	47	43	0.178121	3.11368	1.63862	0.145455	0.0444444	0.10101	0.440452	Not significant	Not significant
group_16487	large conductance mechanosensitive channel protein MscL	8	2	47	43	0.178121	3.11368	1.63862	0.145455	0.0444444	0.10101	0.440452	Not significant	Not significant
group_16489	Oxalate:formate antiporter	8	2	47	43	0.178121	3.11368	1.63862	0.145455	0.0444444	0.10101	0.440452	Not significant	Not significant
group_16490	MarR family transcriptional regulator	8	2	47	43	0.178121	3.11368	1.63862	0.145455	0.0444444	0.10101	0.440452	Not significant	Not significant
group_16496	ABC-type multidrug transport system ATPase and permease component	8	2	47	43	0.178121	3.11368	1.63862	0.145455	0.0444444	0.10101	0.440452	Not significant	Not significant
group_16497	Puromycin N-acetyltransferase;GNAT family acetyltransferase	8	2	47	43	0.178121	3.11368	1.63862	0.145455	0.0444444	0.10101	0.440452	Not significant	Not significant
group_16509	dihydrolipoamide acetyltransferase	8	2	47	43	0.178121	3.11368	1.63862	0.145455	0.0444444	0.10101	0.440452	Not significant	Not significant
group_16510	DUF161 DUF2179 domains-containing protein	8	2	47	43	0.178121	3.11368	1.63862	0.145455	0.0444444	0.10101	0.440452	Not significant	Not significant
group_16511	Cytosolic protein	8	2	47	43	0.178121	3.11368	1.63862	0.145455	0.0444444	0.10101	0.440452	Not significant	Not significant
group_16520	Metal-sulfur cluster biosynthetic enzyme	8	2	47	43	0.178121	3.11368	1.63862	0.145455	0.0444444	0.10101	0.440452	Not significant	Not significant
group_16521	putative flavoprotein YhiN	8	2	47	43	0.178121	3.11368	1.63862	0.145455	0.0444444	0.10101	0.440452	Not significant	Not significant
group_16523	arginine repressor	8	2	47	43	0.178121	3.11368	1.63862	0.145455	0.0444444	0.10101	0.440452	Not significant	Not significant
group_16526	Cytosolic protein	8	2	47	43	0.178121	3.11368	1.63862	0.145455	0.0444444	0.10101	0.440452	Not significant	Not significant
group_16530	phosphopantothenate--cysteine ligase	8	2	47	43	0.178121	3.11368	1.63862	0.145455	0.0444444	0.10101	0.440452	Not significant	Not significant
group_16537	S-formylglutathione hydrolase FrmB	8	2	47	43	0.178121	3.11368	1.63862	0.145455	0.0444444	0.10101	0.440452	Not significant	Not significant
group_16554	Bacterial membrane protein YfhO;Uncharacterized membrane protein YfhO	8	2	47	43	0.178121	3.11368	1.63862	0.145455	0.0444444	0.10101	0.440452	Not significant	Not significant
group_16560	co-chaperone GroES	8	2	47	43	0.178121	3.11368	1.63862	0.145455	0.0444444	0.10101	0.440452	Not significant	Not significant
group_16580	putative DNA-binding protein	8	2	47	43	0.178121	3.11368	1.63862	0.145455	0.0444444	0.10101	0.440452	Not significant	Not significant
group_16582	3-isopropylmalate dehydrogenase	8	2	47	43	0.178121	3.11368	1.63862	0.145455	0.0444444	0.10101	0.440452	Not significant	Not significant
group_16583	D-alanyl-lipoteichoic acid biosynthesis protein DltB	8	2	47	43	0.178121	3.11368	1.63862	0.145455	0.0444444	0.10101	0.440452	Not significant	Not significant
group_16584	ABC-type multidrug transport system ATPase and permease component	8	2	47	43	0.178121	3.11368	1.63862	0.145455	0.0444444	0.10101	0.440452	Not significant	Not significant
group_16585	cardiolipin synthase	8	2	47	43	0.178121	3.11368	1.63862	0.145455	0.0444444	0.10101	0.440452	Not significant	Not significant
group_16598	ECF transporter S component;ECF-type riboflavin transporter membrane (S) component	8	2	47	43	0.178121	3.11368	1.63862	0.145455	0.0444444	0.10101	0.440452	Not significant	Not significant
group_16599	NADPH-dependent 24-dienoyl-CoA reductase sulfur reductase or a related oxidoreductase	8	2	47	43	0.178121	3.11368	1.63862	0.145455	0.0444444	0.10101	0.440452	Not significant	Not significant
group_16614	F0F1 ATP synthase subunit delta	8	2	47	43	0.178121	3.11368	1.63862	0.145455	0.0444444	0.10101	0.440452	Not significant	Not significant
group_16622	LysM domain-containing protein	8	2	47	43	0.178121	3.11368	1.63862	0.145455	0.0444444	0.10101	0.440452	Not significant	Not significant
group_16628	DNA replication/repair protein RecF	8	2	47	43	0.178121	3.11368	1.63862	0.145455	0.0444444	0.10101	0.440452	Not significant	Not significant
group_16629	tryptophan--tRNA ligase	8	2	47	43	0.178121	3.11368	1.63862	0.145455	0.0444444	0.10101	0.440452	Not significant	Not significant
group_16639	Oligopeptide-binding protein AmiA	8	2	47	43	0.178121	3.11368	1.63862	0.145455	0.0444444	0.10101	0.440452	Not significant	Not significant
group_16656	SUF system NifU family Fe-S cluster assembly protein	8	2	47	43	0.178121	3.11368	1.63862	0.145455	0.0444444	0.10101	0.440452	Not significant	Not significant
group_16657	ABC-type amino acid transport/signal transduction system periplasmic component/domain	8	2	47	43	0.178121	3.11368	1.63862	0.145455	0.0444444	0.10101	0.440452	Not significant	Not significant
group_16658	YolD-like protein	8	2	47	43	0.178121	3.11368	1.63862	0.145455	0.0444444	0.10101	0.440452	Not significant	Not significant
group_16667	phospho-N-acetylmuramoyl-pentapeptide-transferase	8	2	47	43	0.178121	3.11368	1.63862	0.145455	0.0444444	0.10101	0.440452	Not significant	Not significant
group_16669	Superfamily II DNA and RNA helicase	8	2	47	43	0.178121	3.11368	1.63862	0.145455	0.0444444	0.10101	0.440452	Not significant	Not significant
group_16670	Nucleotidyltransferase	8	2	47	43	0.178121	3.11368	1.63862	0.145455	0.0444444	0.10101	0.440452	Not significant	Not significant
group_16676	Response regulator (Homolog to RR11 Spn)	8	2	47	43	0.178121	3.11368	1.63862	0.145455	0.0444444	0.10101	0.440452	Not significant	Not significant
group_16686	Lipoprotein	8	2	47	43	0.178121	3.11368	1.63862	0.145455	0.0444444	0.10101	0.440452	Not significant	Not significant
group_16687	Integral membrane protein	8	2	47	43	0.178121	3.11368	1.63862	0.145455	0.0444444	0.10101	0.440452	Not significant	Not significant
group_16695	Anthranilate/para-aminobenzoate synthase component II (glutamine amidotransferase)	8	2	47	43	0.178121	3.11368	1.63862	0.145455	0.0444444	0.10101	0.440452	Not significant	Not significant
group_16697	Phage-Barnase-EndoU-ColicinE5/D-RelE like nuclease 3 domain-containing protein	8	2	47	43	0.178121	3.11368	1.63862	0.145455	0.0444444	0.10101	0.440452	Not significant	Not significant
group_16702	Nicotinamide-nucleotide adenylyltransferase NadR family / Ribosylnicotinamide kinase	8	2	47	43	0.178121	3.11368	1.63862	0.145455	0.0444444	0.10101	0.440452	Not significant	Not significant
group_16704	Putative flippase GtrA (transmembrane translocase of bactoprenol-linked glucose)	8	2	47	43	0.178121	3.11368	1.63862	0.145455	0.0444444	0.10101	0.440452	Not significant	Not significant
group_16705	Cyclic di-AMP synthase regulator CdaR YbbR domain	8	2	47	43	0.178121	3.11368	1.63862	0.145455	0.0444444	0.10101	0.440452	Not significant	Not significant
group_16716	Aspartate/methionine/tyrosine aminotransferase	8	2	47	43	0.178121	3.11368	1.63862	0.145455	0.0444444	0.10101	0.440452	Not significant	Not significant
group_16717	Glycosyltransferase	8	2	47	43	0.178121	3.11368	1.63862	0.145455	0.0444444	0.10101	0.440452	Not significant	Not significant
group_16724	DNA-binding transcriptional regulator MerR family	8	2	47	43	0.178121	3.11368	1.63862	0.145455	0.0444444	0.10101	0.440452	Not significant	Not significant
group_16730	Phosphoglycerate mutase family protein	8	2	47	43	0.178121	3.11368	1.63862	0.145455	0.0444444	0.10101	0.440452	Not significant	Not significant
group_16735	Transcriptional coactivator p15 (PC4) C-terminal domain-containing protein;Bacterial seryl-tRNA synthetase related protein	8	2	47	43	0.178121	3.11368	1.63862	0.145455	0.0444444	0.10101	0.440452	Not significant	Not significant
group_16752	primosomal protein DnaI	8	2	47	43	0.178121	3.11368	1.63862	0.145455	0.0444444	0.10101	0.440452	Not significant	Not significant
group_16753	Ribonuclease P	8	2	47	43	0.178121	3.11368	1.63862	0.145455	0.0444444	0.10101	0.440452	Not significant	Not significant
group_16770	DNA topology modulation protein	8	2	47	43	0.178121	3.11368	1.63862	0.145455	0.0444444	0.10101	0.440452	Not significant	Not significant
group_16771	Low molecular weight protein-tyrosine-phosphatase yfkJ (LMPTP);Protein-tyrosine-phosphatase	8	2	47	43	0.178121	3.11368	1.63862	0.145455	0.0444444	0.10101	0.440452	Not significant	Not significant
group_16774	Polysaccharide deacetylase family protein	8	2	47	43	0.178121	3.11368	1.63862	0.145455	0.0444444	0.10101	0.440452	Not significant	Not significant
group_16775	homoserine kinase	8	2	47	43	0.178121	3.11368	1.63862	0.145455	0.0444444	0.10101	0.440452	Not significant	Not significant
group_16776	Biotin transporter BioY	8	2	47	43	0.178121	3.11368	1.63862	0.145455	0.0444444	0.10101	0.440452	Not significant	Not significant
group_16780	Mechanosensitive ion channel;Small-conductance mechanosensitive channel	8	2	47	43	0.178121	3.11368	1.63862	0.145455	0.0444444	0.10101	0.440452	Not significant	Not significant
group_16788	Competence-associated protein	8	2	47	43	0.178121	3.11368	1.63862	0.145455	0.0444444	0.10101	0.440452	Not significant	Not significant
group_16791	Phosphate starvation-inducible protein PhoH putative ATPase	8	2	47	43	0.178121	3.11368	1.63862	0.145455	0.0444444	0.10101	0.440452	Not significant	Not significant
group_16798	Selenocysteine lyase/Cysteine desulfurase	8	2	47	43	0.178121	3.11368	1.63862	0.145455	0.0444444	0.10101	0.440452	Not significant	Not significant
group_16812	Nucleoid-associated protein	8	2	47	43	0.178121	3.11368	1.63862	0.145455	0.0444444	0.10101	0.440452	Not significant	Not significant
group_16813	NAD(P)H-dependent oxidoreductase	8	2	47	43	0.178121	3.11368	1.63862	0.145455	0.0444444	0.10101	0.440452	Not significant	Not significant
group_16814	Formate/nitrite transporter family protein	8	2	47	43	0.178121	3.11368	1.63862	0.145455	0.0444444	0.10101	0.440452	Not significant	Not significant
group_16818	N-acetylglucosamine-6-phosphate deacetylase	8	2	47	43	0.178121	3.11368	1.63862	0.145455	0.0444444	0.10101	0.440452	Not significant	Not significant
[truncated: 5,212 more rows]

## Sheet: fisher_specie_level
Gene	Annotation	resistant_present	sensitive_present	resistant_absent	sensitive_absent	p_value	or_haldane	log2_or	freq_R	freq_S	freq_diff	Species	FDR	significance_fdr	significance_nominal
group_17032	Glycosyl transferase family 11	5	0	2	8	0.00699301	37.4	5.22497	0.714286	0	0.714286	Strep. mitis	1	Not significant	Enriched in Resistant
group_18712	dTDP-4-keto-6-deoxyglucose-35-epimerase	5	0	2	8	0.00699301	37.4	5.22497	0.714286	0	0.714286	Strep. mitis	1	Not significant	Enriched in Resistant
group_18713	dTDP-glucose 46-dehydratase	5	0	2	8	0.00699301	37.4	5.22497	0.714286	0	0.714286	Strep. mitis	1	Not significant	Enriched in Resistant
group_19740	Glycosyltransferase EpsE	5	0	2	8	0.00699301	37.4	5.22497	0.714286	0	0.714286	Strep. mitis	1	Not significant	Enriched in Resistant
group_20351	glycosyltransferase;Group 1 glycosyl transferase	5	0	2	8	0.00699301	37.4	5.22497	0.714286	0	0.714286	Strep. mitis	1	Not significant	Enriched in Resistant
group_20116	hypothetical protein;ABC-2 family transporter protein;ABC transporter permease;ABC-type transport system involved in multi-copper enzyme maturation permease component	1	7	6	1	0.010101	0.0461538	-4.43741	0.142857	0.875	-0.732143	Strep. mitis	1	Not significant	Enriched in Sensitive
group_20599	ABC-type polysaccharide/polyol phosphate transport system ATPase component	1	7	6	1	0.010101	0.0461538	-4.43741	0.142857	0.875	-0.732143	Strep. mitis	1	Not significant	Enriched in Sensitive
group_21765	DUF4190 domain-containing protein	1	7	6	1	0.010101	0.0461538	-4.43741	0.142857	0.875	-0.732143	Strep. mitis	1	Not significant	Enriched in Sensitive
blpS~~~lytR~~~lytT	LytTr DNA-binding domain protein;BlpS protein;LytR family transcriptional regulator;DNA-binding response regulator LytR/AlgR family	4	0	3	8	0.025641	21.8571	4.45003	0.571429	0	0.571429	Strep. mitis	1	Not significant	Enriched in Resistant
efeO	iron uptake system protein EfeO;Lipoprotein;Imelysin-like domain-containing protein	0	5	7	3	0.025641	0.0424242	-4.55897	0	0.625	-0.625	Strep. mitis	1	Not significant	Enriched in Sensitive
group_1148	DUF6287 domain-containing protein	4	0	3	8	0.025641	21.8571	4.45003	0.571429	0	0.571429	Strep. mitis	1	Not significant	Enriched in Resistant
group_1786	Plasmid stabilization system protein;Plasmid stabilization system protein RelE/ParE family;Toxin to DNA-damage-inducible protein J;Addiction module toxin RelE/StbE family;Type II toxin-antitoxin system RelE/ParE family toxin	0	5	7	3	0.025641	0.0424242	-4.55897	0	0.625	-0.625	Strep. mitis	1	Not significant	Enriched in Sensitive
group_1800	RelB antitoxin;DNA-damage-inducible protein J;type II toxin-antitoxin system RelB/DinJ family antitoxin;RelB antitoxin family protein	0	5	7	3	0.025641	0.0424242	-4.55897	0	0.625	-0.625	Strep. mitis	1	Not significant	Enriched in Sensitive
group_197	Choline-binding protein Cbp8;hypothetical protein	4	0	3	8	0.025641	21.8571	4.45003	0.571429	0	0.571429	Strep. mitis	1	Not significant	Enriched in Resistant
group_21307	Bacteriocin immunity protein	4	0	3	8	0.025641	21.8571	4.45003	0.571429	0	0.571429	Strep. mitis	1	Not significant	Enriched in Resistant
group_2604	hypothetical protein;Methyltransferase domain-containing protein;Methyltransferase;class I SAM-dependent methyltransferase;Class I SAM-dependent methyltransferase;Ubiquinone/menaquinone biosynthesis C-methylase UbiE/MenG;Methyltransferase type 11	0	5	7	3	0.025641	0.0424242	-4.55897	0	0.625	-0.625	Strep. mitis	1	Not significant	Enriched in Sensitive
group_60	YSIRK-type signal peptide-containing protein;LPXTG-motif cell wall anchor domain protein;Gram-positive cocci surface proteins LPxTG domain-containing protein	4	0	3	8	0.025641	21.8571	4.45003	0.571429	0	0.571429	Strep. mitis	1	Not significant	Enriched in Resistant
group_1458	type II toxin-antitoxin system toxin PezT;hypothetical protein;zeta toxin family protein;UDP-N-acetylglucosamine kinase;Toxin PezT	3	8	4	0	0.025641	0.0457516	-4.45003	0.428571	1	-0.571429	Strep. mitis	1	Not significant	Enriched in Sensitive
group_1635	Antitoxin PezA;type II toxin-antitoxin system antitoxin PezA;Transcription regulator putative;helix-turn-helix transcriptional regulator	3	8	4	0	0.025641	0.0457516	-4.45003	0.428571	1	-0.571429	Strep. mitis	1	Not significant	Enriched in Sensitive
group_2333	Transporter	5	1	2	7	0.0405594	11	3.45943	0.714286	0.125	0.589286	Strep. mitis	1	Not significant	Enriched in Resistant
group_2453	MutR family transcriptional regulator;XRE family transcriptional regulator	5	1	2	7	0.0405594	11	3.45943	0.714286	0.125	0.589286	Strep. mitis	1	Not significant	Enriched in Resistant
group_1258	SAG1250 family conjugative relaxase;Lantibiotic streptin immunity protein;Lantibiotic streptin immunity protein C-terminal domain-containing protein;Tn5252 relaxase;hypothetical protein;Relaxase/mobilization nuclease family protein;MobA/VirD2-like nuclease domain-containing protein	2	7	5	1	0.0405594	0.0909091	-3.45943	0.285714	0.875	-0.589286	Strep. mitis	1	Not significant	Enriched in Sensitive
group_21425	DNA alkylation repair enzyme;DNA alkylation repair protein	6	2	1	6	0.0405594	11.2667	3.49399	0.857143	0.25	0.607143	Strep. mitis	1	Not significant	Enriched in Resistant
group_19713	DUF4767 domain-containing protein;Lipoprotein	1	6	6	2	0.0405594	0.0887574	-3.49399	0.142857	0.75	-0.607143	Strep. mitis	1	Not significant	Enriched in Sensitive
group_20918	Chlorohydrolase	1	6	6	2	0.0405594	0.0887574	-3.49399	0.142857	0.75	-0.607143	Strep. mitis	1	Not significant	Enriched in Sensitive
group_3070	Major facilitator superfamily (MFS) profile domain-containing protein;Transport protein	1	6	6	2	0.0405594	0.0887574	-3.49399	0.142857	0.75	-0.607143	Strep. mitis	1	Not significant	Enriched in Sensitive
celA	Oligo-beta-mannoside-specific phosphotransferase enzyme IIB component;PTS family porter (PTS) cellobiose-specific IIB component;Phosphotransferase system (PTS) cellobiose-specific IIB component;Phosphotransferase system cellobiose-specific component IIB	3	0	4	8	0.0769231	13.2222	3.72489	0.428571	0	0.428571	Strep. mitis	1	Not significant	Not significant
celC	Lichenan-specific phosphotransferase enzyme IIA component;PTS system Lactose/Cellobiose specific IIA subunit;NN'-diacetylchitobiose-specific phosphotransferase enzyme IIA component;Phosphotransferase system cellobiose-specific component IIA	3	0	4	8	0.0769231	13.2222	3.72489	0.428571	0	0.428571	Strep. mitis	1	Not significant	Not significant
deoR~~~ulaR~~~glpR	Transcription regulator DeoR family;HTH-type transcriptional regulator UlaR;Transcriptional regulator DeoR family;Glycerol-3-phosphate regulon repressor;DNA-binding transcriptional regulator of sugar metabolism DeoR/GlpR family	3	0	4	8	0.0769231	13.2222	3.72489	0.428571	0	0.428571	Strep. mitis	1	Not significant	Not significant
doc	Prophage maintenance system killer protein (DOC: death-on-curing) putative;Death-on-curing family protein;Prophage maintenance system killer protein;Toxin-antitoxin system toxin component Fic family;Toxin Doc	3	0	4	8	0.0769231	13.2222	3.72489	0.428571	0	0.428571	Strep. mitis	1	Not significant	Not significant
fsa	fructose-6-phosphate aldolase	3	0	4	8	0.0769231	13.2222	3.72489	0.428571	0	0.428571	Strep. mitis	1	Not significant	Not significant
gldA	Glycerol dehydrogenase;Glycerol dehydrogenase NAD+ dependent putative;Glycerol dehydrogenase or related enzyme iron-containing ADH family;hypothetical protein	3	0	4	8	0.0769231	13.2222	3.72489	0.428571	0	0.428571	Strep. mitis	1	Not significant	Not significant
group_1568	Pyruvate formate-lyase 3;4-hydroxyphenylacetate decarboxylase activating enzyme;Glycyl-radical enzyme activating protein	3	0	4	8	0.0769231	13.2222	3.72489	0.428571	0	0.428571	Strep. mitis	1	Not significant	Not significant
group_1638	Pyruvate-formate lyase	3	0	4	8	0.0769231	13.2222	3.72489	0.428571	0	0.428571	Strep. mitis	1	Not significant	Not significant
group_1679	16S rRNA processing protein RimM	3	0	4	8	0.0769231	13.2222	3.72489	0.428571	0	0.428571	Strep. mitis	1	Not significant	Not significant
group_1738	Integrase	3	0	4	8	0.0769231	13.2222	3.72489	0.428571	0	0.428571	Strep. mitis	1	Not significant	Not significant
group_1829	Autolysin;Gametolysin	3	0	4	8	0.0769231	13.2222	3.72489	0.428571	0	0.428571	Strep. mitis	1	Not significant	Not significant
group_1830	phage holin;N-acetylmuramoyl-L-alanine amidase	3	0	4	8	0.0769231	13.2222	3.72489	0.428571	0	0.428571	Strep. mitis	1	Not significant	Not significant
group_1911	Permease IIC component;Phosphotransferase system cellobiose-specific component IIC	3	0	4	8	0.0769231	13.2222	3.72489	0.428571	0	0.428571	Strep. mitis	1	Not significant	Not significant
group_20991	Chromosomal replication initiator protein DnaA;DnaA/Hda family protein;Bacterial dnaA family protein	3	0	4	8	0.0769231	13.2222	3.72489	0.428571	0	0.428571	Strep. mitis	1	Not significant	Not significant
group_21094	Alanine aminotransferase;Phage protein;Lipoprotein	4	8	3	0	0.0769231	0.0756303	-3.72489	0.571429	1	-0.428571	Strep. mitis	1	Not significant	Not significant
group_5572	DNA-binding transcriptional regulator LsrR DeoR family	3	0	4	8	0.0769231	13.2222	3.72489	0.428571	0	0.428571	Strep. mitis	1	Not significant	Not significant
acpA~~~acpB	M protein trans-acting positive regulator;Capsule synthesis positive regulator AcpA;Capsule synthesis positive regulator AcpB	0	4	7	4	0.0769231	0.0666667	-3.90689	0	0.5	-0.5	Strep. mitis	1	Not significant	Not significant
cas1	type II CRISPR-associated endonuclease Cas1	0	4	7	4	0.0769231	0.0666667	-3.90689	0	0.5	-0.5	Strep. mitis	1	Not significant	Not significant
cas2	CRISPR-associated endonuclease Cas2	0	4	7	4	0.0769231	0.0666667	-3.90689	0	0.5	-0.5	Strep. mitis	1	Not significant	Not significant
csn2	type II-A CRISPR-associated protein Csn2	0	4	7	4	0.0769231	0.0666667	-3.90689	0	0.5	-0.5	Strep. mitis	1	Not significant	Not significant
dltB	D-alanyl-lipoteichoic acid biosynthesis protein DltB;Putative membrane protein;DltB domain protein;Teichoic acid D-alanyltransferase	0	4	7	4	0.0769231	0.0666667	-3.90689	0	0.5	-0.5	Strep. mitis	1	Not significant	Not significant
dltD	D-alanyl-lipoteichoic acid biosynthesis protein DltD	0	4	7	4	0.0769231	0.0666667	-3.90689	0	0.5	-0.5	Strep. mitis	1	Not significant	Not significant
efeB	hypothetical protein;Peroxidase;iron uptake transporter deferrochelatase/peroxidase subunit;Tat pathway signal sequence domain protein	0	4	7	4	0.0769231	0.0666667	-3.90689	0	0.5	-0.5	Strep. mitis	1	Not significant	Not significant
group_1255	CRISPR-associated endonuclease Cas9/Csn1;type II CRISPR RNA-guided endonuclease Cas9	0	4	7	4	0.0769231	0.0666667	-3.90689	0	0.5	-0.5	Strep. mitis	1	Not significant	Not significant
group_1333	IS3 family transposase;Integrase catalytic domain-containing protein;Transposase;IS3 family transposase ORF B;Integrase	0	4	7	4	0.0769231	0.0666667	-3.90689	0	0.5	-0.5	Strep. mitis	1	Not significant	Not significant
group_16500	HTH cro/C1-type domain-containing protein	0	4	7	4	0.0769231	0.0666667	-3.90689	0	0.5	-0.5	Strep. mitis	1	Not significant	Not significant
group_18466	Asp-tRNA(Asn)/Glu-tRNA(Gln) amidotransferase GatCAB subunit B;Aspartyl/glutamyl-tRNA(Asn/Gln) amidotransferase subunit B;Aspartyl-tRNA(Asn) amidotransferase subunit B / Glutamyl-tRNA(Gln) amidotransferase subunit B	0	4	7	4	0.0769231	0.0666667	-3.90689	0	0.5	-0.5	Strep. mitis	1	Not significant	Not significant
group_1923	YSIRK signal domain/LPXTG anchor domain surface protein;hypothetical protein;YSIRK type signal peptide	0	4	7	4	0.0769231	0.0666667	-3.90689	0	0.5	-0.5	Strep. mitis	1	Not significant	Not significant
group_19586	N-acetyltransferase domain-containing protein;Spermine/spermidine acetyltransferase;hypothetical protein;Protein N-acetyltransferase RimJ/RimL family	0	4	7	4	0.0769231	0.0666667	-3.90689	0	0.5	-0.5	Strep. mitis	1	Not significant	Not significant
group_2037	DNA-binding protein;hypothetical protein;Transposase;IS861 transposase Orf1;IS3 family transposase ORF A;IS3 family ISSpn11 transposase ORF A;Mobile element protein	0	4	7	4	0.0769231	0.0666667	-3.90689	0	0.5	-0.5	Strep. mitis	1	Not significant	Not significant
group_20525	DUF1310 domain-containing protein;hypothetical protein	0	4	7	4	0.0769231	0.0666667	-3.90689	0	0.5	-0.5	Strep. mitis	1	Not significant	Not significant
group_2074	DNA-directed DNA polymerase IV;DNA polymerase IV	0	4	7	4	0.0769231	0.0666667	-3.90689	0	0.5	-0.5	Strep. mitis	1	Not significant	Not significant
group_20872	Phage protein	0	4	7	4	0.0769231	0.0666667	-3.90689	0	0.5	-0.5	Strep. mitis	1	Not significant	Not significant
group_21082	Flagellar FliJ protein	0	4	7	4	0.0769231	0.0666667	-3.90689	0	0.5	-0.5	Strep. mitis	1	Not significant	Not significant
group_21220	DUF2974 domain-containing protein;Triacylglycerol lipase;PRC-barrel domain-containing protein	0	4	7	4	0.0769231	0.0666667	-3.90689	0	0.5	-0.5	Strep. mitis	1	Not significant	Not significant
[truncated: 50,416 more rows]

## Sheet: enriched_location
Gene	Annotation	Group	Location	n_isolates	n_present	freq
[truncated: 200 more rows]

## Sheet: enrich_percentage
Species	Gene	Annotation	Group	Location	n_isolates	n_present	percent
[truncated: 300 more rows]

## Sheet: Chi-square
species	n	test	statistic	p_value	note	p_adj_BH
[truncated: 7 more rows]
