# Supplementary material
Source: Research Square preprint supplement (doi:10.21203/rs.3.rs-8825984/v1)
Supplement: Supplementary file 3 [file 261dccfdf9f73858566b1b13.xlsx]

## Sheet: Sup_Data S2_Metadata
isolate_id	Family	Species	UMAP_cluster	Strains	Location	Patient	Age	Sex	Cancer_type	Tumour_location	Cancer_stage	Smoking_Status	Genome_Size	GC_Content	Genome_Gene_Count	Mean	SD	Group	Resistant_level
8355A1	Streptococcus	Strep. salivarius	1	Strep. salivarius_D	Oral cavity	8355	80	Male	Laryngeal cancer	Neck	NA	Never	2235164	39.9198	2006	92.9149	5.40593	Resistant	High
8355AN2	Streptococcus	Strep. salivarius	1	Strep. salivarius_D	Oral cavity	8355	90	Male	Laryngeal cancer	Neck	NA	Never	2147822	39.7229	1967	81.5103	6.99265	Resistant	High
8514A7	Streptococcus	Strep. caecimuris	2	Strep. caecimuris	Oral cavity	8514	75	Male	Laryngeal cancer	Glottis	cT4aN2b	Nill	2219733	42.0832	2095	76.2982	4.93118	Resistant	High
8497OA7	Streptococcus	Strep. salivarius	1	Strep. salivarius_D	Oral cavity	8497	58	Male	Oropharyngeal cancer	Tonsil	pT2pN1	Yes	2243860	39.6815	2052	73.8696	14.2691	Resistant	High
8513A4	Streptococcus	Strep. oralis	6	Strep. oralis_BY	Oral cavity	8513	48	Male	Laryngeal cancer	Glottis	pT3N0Mx	Nill	1976636	40.9959	1869	72.9841	8.51977	Resistant	High
8511A7	Streptococcus	Strep. parasanguinis	2	Strep. parasanguinis	Oral cavity	8511	76	Female	Oral cancer	Tongue	pT3N0Mx	Heavy smoker	2189599	41.7348	1974	72.3002	7.48659	Resistant	High
8468T2	Streptococcus	Strep.BHI_7	7	Strep.BHI_7	Tumour	8462	69	Male	Control	Control	Control	Nill	2020539	39.7276	1846	70.5181	3.43903	Resistant	High
8421OA3	Streptococcus	Strep. salivarius	1	Strep. salivarius	Oral cavity	8421	73	Male	Laryngeal cancer	Glottis	PT4aN0M0	Yes	2306578	39.8667	2058	69.609	5.04919	Resistant	High
8457AT2	Streptococcus	Strep. salivarius	1	Strep. salivarius	Tumour	8457	77	Male	Oropharyngeal cancer	Oropharynx	rT4N0M0	Yes	2156028	39.9333	1941	62.8017	3.49421	Resistant	High
8468DM31	Streptococcus	Strep.BHI_8	4	Strep.BHI_8	Tumour	8468	59	Male	Oral cancer	Mouth	NA	Nill	2067415	39.9392	1985	60.4581	7.44054	Resistant	High
8513A7	Streptococcus	Strep. mutans	7	Strep. mutans	Oral cavity	8513	48	Male	Laryngeal cancer	Glottis	pT3N0Mx	Nill	2004987	36.9337	1859	56.9936	5.2957	Resistant	High
8515A8	Streptococcus	Strep. oralis	6	Strep. oralis_BM	Oral cavity	8515	80	Male	Oral cancer	Mandible	T4N0	Never	1995304	40.8402	1928	55.9333	6.3666	Resistant	High
8511A8	Streptococcus	Strep. oralis	6	Strep. oralis_BY	Oral cavity	8511	76	Female	Oral cancer	Tongue	pT3N0Mx	Heavy smoker	2046718	41.1837	1920	54.027	4.08996	Resistant	High
8513A11	Streptococcus	Strep.BHI_10	6	Strep.BHI_10	Oral cavity	8513	48	Male	Laryngeal cancer	Glottis	pT3N0Mx	Nill	1968622	41.0032	1867	49.122	4.58211	Resistant	Medium
8355AN1	Streptococcus	Strep. infantis	7	Strep. infantis_F	Oral cavity	8355	80	Male	Laryngeal cancer	Neck	NA	Never	2059538	39.7056	1869	48.362	4.69316	Resistant	Medium
8408OA3	Streptococcus	Strep. parasanguinis	2	Strep. parasanguinis_D	Oral cavity	8408	88	Male	Laryngeal cancer	Larynx	NA	Nill	2116670	41.7237	1998	47.2963	4.6356	Resistant	Medium
8524AN8	Streptococcus	Strep. constellatus	3	Strep. constellatus	Oral cavity	8524	81	Male	Oral cancer	Tongue	pT2N2bM0	Heavy smoker	2038119	37.8956	1980	42.5231	3.04489	Resistant	Medium
8451ANT1	Streptococcus	Strep.BHI_5	2	Strep.BHI_5	Tumour	8451	79	Male	Oral cancer	Tongue	NA	Nill	1952892	42.211	1841	42.0974	4.43031	Resistant	Medium
8468OAN3	Streptococcus	Strep. infantis	7	Strep. infantis_I	Oral cavity	8468	59	Male	Oral cancer	Mouth	NA	Nill	1740778	39.4761	1684	41.343	6.16057	Resistant	Medium
8468OAN1	Streptococcus	Strep. xiaochunlingii	2	Strep. xiaochunlingii	Oral cavity	8468	59	Male	Oral cancer	Mouth	NA	Nill	2070560	41.8062	2014	33.287	2.81624	Resistant	Medium
8420OA2	Streptococcus	Strep. oralis	6	Strep. oralis_S	Oral cavity	8420	67	Male	Laryngeal cancer	Larynx	NA	Nill	2039588	41.0323	1947	33.0553	1.99199	Resistant	Medium
8389SA4	Streptococcus	Strep. sp001556435	1	Strep. sp001556435	Oral cavity	8389	73	Male	Nasopharyngeal cancer	Sinus	NA	Heavy smoker	2267952	40.0011	2050	31.7205	3.56575	Resistant	Medium
8451AT5	Streptococcus	Strep. infantis	7	Strep. infantis_I	Tumour	8451	79	Male	Oral cancer	Tongue	NA	Nill	1708086	39.5007	1634	27.5933	3.36018	Resistant	Low
8514A6	Streptococcus	Strep. vestibularis	1	Strep. vestibularis	Oral cavity	8514	75	Male	Laryngeal cancer	Glottis	cT4aN2b	Nill	2057009	39.5036	1950	27.3387	4.3413	Resistant	Low
8451ANT4	Streptococcus	Strep. infantis	7	Strep. infantis_M	Tumour	8451	79	Male	Oral cancer	Tongue	NA	Nill	1770353	39.5617	1704	26.8597	3.94688	Resistant	Low
8691DM4	Streptococcus	Strep. xiaochunlingii	2	Strep. xiaochunlingii	Tumour	8691	76	Male	Oral cancer	Tongue	pT2N0Mx	Nill	1948656	42.2023	1879	26.8511	3.70424	Resistant	Low
8324OAN8	Streptococcus	Strep. parasanguinis	2	Strep. parasanguinis_B	Oral cavity	8324	68	Male	Salivary gland cancer	Parotid gland	T4a - invades skin	Yes	2133804	42.0732	2124	26.6413	3.18713	Resistant	Low
8507OAN12	Streptococcus	Strep.BHI_8	4	Strep.BHI_8	Oral cavity	8507	58	Female	Oral cancer	FOM	cT3N0	Heavy smoker	2290060	39.4327	2187	26.3945	1.88145	Resistant	Low
8420OA3	Streptococcus	Strep. hominis	3	Strep. hominis	Oral cavity	8420	67	Male	Laryngeal cancer	Larynx	NA	Nill	1869982	39.0479	1768	26.3542	1.88408	Resistant	Low
8513AN9.2	Streptococcus	Strep. constellatus	3	Strep. constellatus	Oral cavity	8513	48	Male	Laryngeal cancer	Glottis	pT3N0Mx	Nill	1903393	38.0016	1806	25.7703	5.56434	Resistant	Low
8513A9	Streptococcus	Strep. mitis	4	Strep. mitis_BZ	Oral cavity	8513	48	Male	Laryngeal cancer	Glottis	pT3N0Mx	Nill	1993432	40.1692	1916	25.6813	2.69928	Resistant	Low
8498OA9	Streptococcus	Strep. oralis	6	Strep. oralis_C	Oral cavity	8498	51	Male	Oral cancer	FOM	pT2N0Mx	Heavy smoker	2014768	40.8091	1902	25.6465	3.964	Resistant	Low
8451ANG2	Streptococcus	Strep. gordonii	5	Strep. gordonii	Oral cavity	8451	79	Male	Oral cancer	Tongue	NA	Nill	2255362	40.3556	2124	25.4433	3.39535	Resistant	Low
8512A8	Streptococcus	Strep. mitis	4	Strep. mitis_BX	Oral cavity	8512	57	Male	Oral cancer	Tongue	T4aN2c	Heavy smoker	2014223	39.9019	1888	25.3285	4.84551	Resistant	Low
8497OA8	Streptococcus	Strep. parasanguinis	2	Strep. parasanguinis_D	Oral cavity	8497	58	Male	Oropharyngeal cancer	Tonsil	pT2pN1	Yes	2070898	41.7328	1970	25.1333	2.0604	Resistant	Low
8507OA5	Streptococcus	Strep. sp001813105	2	Strep. sp001813105	Oral cavity	8507	58	Female	Oral cancer	FOM	cT3N0	Heavy smoker	2121398	41.9867	1984	24.7862	4.90676	Resistant	Low
8498AN14.3	Streptococcus	Strep. mitis	4	Strep. mitis_CY	Oral cavity	8498	51	Male	Oral cancer	FOM	pT2N0Mx	Heavy smoker	1835311	40.3439	1742	24.4056	3.73132	Resistant	Low
8511AN11	Streptococcus	Strep. anginosus	3	Strep. anginosus	Oral cavity	8511	76	Female	Oral cancer	Tongue	pT3N0Mx	Heavy smoker	1915637	38.5137	1845	24.2334	3.49253	Resistant	Low
8633AN4	Streptococcus	Strep.BHI_11	4	Strep.BHI_11	Oral cavity	8633	59	Male	Oral cancer	Tongue	pT3N0Mx	Yes	2155448	39.5426	2054	24.0365	3.71801	Resistant	Low
8485DM3	Streptococcus	Strep. parasanguinis	2	Strep. parasanguinis_I	Tumour	8485	72	Male	Laryngeal cancer	Larynx	pT4aN0Mx	Nill	2242498	41.7306	2158	23.3434	4.07529	Resistant	Low
8676A3	Streptococcus	Strep. mitis	4	Strep. mitis_BZ	Oral cavity	8676	61	Female	Oral cancer	Gingivobuccal sulcus	T3N0	Nill	1927314	40.2591	1843	23.2344	3.53382	Resistant	Low
8676AN8	Streptococcus	Strep. pseudopneumoniae	7	Strep. pseudopneumoniae_N	Oral cavity	8676	61	Female	Oral cancer	Gingivobuccal sulcus	T3N0	Nill	2094957	39.3223	1969	22.8943	2.39317	Resistant	Low
8451DM12	Streptococcus	Strep. gordonii	5	Strep. gordonii	Tumour	8451	79	Male	Oral cancer	Tongue	NA	Nill	2232141	40.2751	2119	22.8262	4.17444	Resistant	Low
8431AN1	Streptococcus	Strep. mitis	4	Strep. mitis	Oral cavity	8431	41	Male	Oral cancer	Tongue	cT2N0M0	Yes	2107185	39.876	2000	22.3669	1.64645	Resistant	Low
8485AN1	Streptococcus	Strep. hominis	3	Strep. hominis	Oral cavity	8485	72	Male	Laryngeal cancer	Larynx	pT4aN0Mx	Nill	1861519	38.8802	1780	21.8371	3.55428	Resistant	Low
8633TD5	Streptococcus	Strep. sinensis	5	Strep. sinensis	Tumour	8633	59	Male	Oral cancer	Tongue	pT3N0Mx	Yes	2176144	42.1294	2038	20.4559	3.66831	Resistant	Low
8676AN5	Streptococcus	Strep. mitis	4	Strep. mitis_BZ	Oral cavity	8676	61	Female	Oral cancer	Gingivobuccal sulcus	T3N0	Nill	1941094	40.2182	1843	20.2556	5.48635	Resistant	Low
8485AN10	Streptococcus	Strep. hominis	3	Strep. hominis	Oral cavity	8485	72	Male	Laryngeal cancer	Larynx	pT4aN0Mx	Nill	1928290	38.9533	1814	18.8993	3.27318	Resistant	Low
8498AN8	Streptococcus	Strep. massiliensis	7	Strep. massiliensis	Oral cavity	8498	51	Male	Oral cancer	FOM	pT2N0Mx	Heavy smoker	2041039	41.5169	2029	18.8159	1.69362	Resistant	Low
8513A12	Streptococcus	Strep. constellatus	3	Strep. constellatus	Oral cavity	8513	48	Male	Laryngeal cancer	Glottis	pT3N0Mx	Nill	1868056	38.0332	1778	18.2632	2.3794	Resistant	Low
8457OAN3	Streptococcus	Strep. infantis	7	Strep. infantis_F	Oral cavity	8457	77	Male	Oropharyngeal cancer	Oropharynx	rT4N0M0	Yes	2034800	39.4477	1912	17.2341	2.34975	Resistant	Low
8515AN11	Streptococcus	Strep. sp029691405	6	Strep. sp029691405	Oral cavity	8515	80	Male	Oral cancer	Mandible	T4N0	Never	2011507	41.1475	1904	17.1649	2.1343	Resistant	Low
8512A6.2	Streptococcus	Strep. parasanguinis	2	Strep. parasanguinis_F	Oral cavity	8512	57	Male	Oral cancer	Tongue	T4aN2c	Heavy smoker	2123739	41.9322	1979	16.5432	1.31654	Resistant	Low
8511A3	Streptococcus	Strep. salivarius	1	Strep. salivarius_D	Oral cavity	8511	76	Female	Oral cancer	Tongue	pT3N0Mx	Heavy smoker	2221993	39.9014	2004	16.0001	2.7434	Resistant	Low
8485AN4	Streptococcus	Strep. sp901875575	4	Strep. sp901875575	Oral cavity	8485	72	Male	Laryngeal cancer	Larynx	pT4aN0Mx	Nill	1922557	38.6623	1784	15.8871	1.56894	Resistant	Low
8497AN4	Streptococcus	Strep. mitis	4	Strep. mitis_CY	Oral cavity	8497	58	Male	Oropharyngeal cancer	Tonsil	pT2pN1	Yes	1840036	40.339	1740	12.4581	1.09556	Resistant	Low
8457OAN1	Streptococcus	Strep. sp002238115	4	Strep. sp002238115	Oral cavity	8457	77	Male	Oropharyngeal cancer	Oropharynx	rT4N0M0	Yes	1989117	39.86	1863	9.63313	3.74118	Sensitive	Sensitive
8485A2	Streptococcus	Strep.BHI_9	4	Strep.BHI_9	Oral cavity	8485	72	Male	Laryngeal cancer	Larynx	pT4aN0Mx	Nill	2022084	39.9668	1896	9.53516	0.880979	Sensitive	Sensitive
8511AN3	Streptococcus	Strep. hominis	3	Strep. hominis	Oral cavity	8511	76	Female	Oral cancer	Tongue	pT3N0Mx	Heavy smoker	2046162	38.7595	1965	9.32292	1.71643	Sensitive	Sensitive
8484A8	Streptococcus	Strep. mitis	4	Strep. mitis_CD	Oral cavity	8484	64	Male	Laryngeal cancer	Glottis	pT3N2cMx	Yes	2049632	40.0637	1904	9.20565	2.1112	Sensitive	Sensitive
8512AN2	Streptococcus	Strep. anginosus	3	Strep. anginosus	Oral cavity	8512	57	Male	Oral cancer	Tongue	T4aN2c	Heavy smoker	1940998	38.9618	1847	8.79432	1.27562	Sensitive	Sensitive
8451DM8	Streptococcus	Strep. hominis	3	Strep. hominis	Tumour	8451	79	Male	Oral cancer	Tongue	NA	Nill	1942109	38.9547	1810	8.58597	1.2132	Sensitive	Sensitive
8691AN2	Streptococcus	Strep. gordonii	5	Strep. gordonii	Oral cavity	8691	76	Male	Oral cancer	Tongue	pT2N0Mx	Nill	2177003	40.4611	2049	7.92724	2.26888	Sensitive	Sensitive
8468AN4	Streptococcus	Strep. rubneri	2	Strep. rubneri	Oral cavity	8468	59	Male	Oral cancer	Mouth	NA	Nill	2120646	41.7464	1987	6.62841	2.54705	Sensitive	Sensitive
8524AN5	Streptococcus	Strep. mitis	4	Strep. mitis_BX	Oral cavity	8524	71	Male	Oral cancer	Tongue	pT2N2bM0	Heavy smoker	1968138	40.0143	1821	6.55661	2.83296	Sensitive	Sensitive
8524A10	Streptococcus	Strep. mitis	4	Strep. mitis	Oral cavity	8524	71	Male	Oral cancer	Tongue	pT2N2bM0	Heavy smoker	1916567	40.1147	1825	6.35767	1.40821	Sensitive	Sensitive
8451DM4	Streptococcus	Strep. oralis	6	Strep. oralis	Tumour	8451	79	Male	Oral cancer	Tongue	NA	Nill	2104547	40.756	1952	6.20754	2.11682	Sensitive	Sensitive
8515AN14	Streptococcus	Strep. gordonii	5	Strep. gordonii	Oral cavity	8515	80	Male	Oral cancer	Mandible	T4N0	Never	2278231	40.3596	2217	5.75184	3.09476	Sensitive	Sensitive
8514A10	Streptococcus	Strep. vestibularis	1	Strep. vestibularis	Oral cavity	8514	75	Male	Laryngeal cancer	Glottis	cT4aN2b	Nill	2073618	39.5979	1934	5.73692	1.65187	Sensitive	Sensitive
8389O4	Streptococcus	Strep. sp013394695	7	Strep. sp013394695	Oral cavity	8389	73	Male	Nasopharyngeal cancer	Sinus	NA	Heavy smoker	1829093	39.5687	1771	5.67081	2.33932	Sensitive	Sensitive
8484A3	Streptococcus	Strep. mitis	4	Strep. mitis_CD	Oral cavity	8484	64	Male	Laryngeal cancer	Glottis	pT3N2cMx	Yes	2050115	40.0758	1920	5.32266	3.28234	Sensitive	Sensitive
8457OAN4	Streptococcus	Strep. infantis	7	Strep. infantis_F	Oral cavity	8457	77	Male	Oropharyngeal cancer	Oropharynx	rT4N0M0	Yes	2048590	39.4878	1922	5.29671	1.03655	Sensitive	Sensitive
8515AN6	Streptococcus	Strep. sanguinis	5	Strep. sanguinis_A	Oral cavity	8515	80	Male	Oral cancer	Mandible	T4N0	Never	2437257	43.2566	2337	5.24931	2.16678	Sensitive	Sensitive
8676A7	Streptococcus	Strep. gordonii	5	Strep. gordonii	Oral cavity	8676	61	Female	Oral cancer	Gingivobuccal sulcus	T3N0	Nill	2192399	40.3643	2066	4.67184	1.84136	Sensitive	Sensitive
8305OA4	Streptococcus	Strep.BHI_2	4	Strep.BHI_2	Oral cavity	8305	73	Male	Salivary gland cancer	Parotid gland	NA	Nill	2091830	40.1881	1962	4.52794	2.10753	Sensitive	Sensitive
8451AT8	Streptococcus	Strep.BHI_6	4	Strep.BHI_6	Tumour	8451	79	Male	Oral cancer	Tongue	NA	Nill	2107019	39.7829	2029	4.52612	2.27829	Sensitive	Sensitive
8451AT7	Streptococcus	Strep. sanguinis	5	Strep. sanguinis_O	Tumour	8451	79	Male	Oral cancer	Tongue	NA	Nill	2448944	42.7511	2336	4.31691	1.77918	Sensitive	Sensitive
8431AN6	Streptococcus	Strep.BHI_4	4	Strep.BHI_4	Oral cavity	8431	41	Male	Oral cancer	Tongue	cT2N0M0	Yes	2098193	39.4759	2006	4.25626	0.694425	Sensitive	Sensitive
8451AG2	Streptococcus	Strep. infantis	7	Strep. infantis_I	Oral cavity	8451	79	Male	Oral cancer	Tongue	NA	Nill	1707050	39.4984	1633	4.09573	0.909578	Sensitive	Sensitive
8421A4	Streptococcus	Strep. parasanguinis	2	Strep. parasanguinis_D	Oral cavity	8421	73	Male	Laryngeal cancer	Glottis	PT4aN0M0	Yes	2063219	41.8209	1970	4.07388	1.77695	Sensitive	Sensitive
8514A9	Streptococcus	Strep. parasanguinis	2	Strep. parasanguinis	Oral cavity	8514	75	Male	Laryngeal cancer	Glottis	cT4aN2b	Nill	2342880	41.3158	2164	4.03454	1.52666	Sensitive	Sensitive
8513A10	Streptococcus	Strep. gordonii	5	Strep. gordonii	Oral cavity	8513	48	Male	Laryngeal cancer	Glottis	pT3N0Mx	Nill	2180474	40.3756	2065	3.87743	3.19692	Sensitive	Sensitive
8451AT6	Streptococcus	Strep. infantis	7	Strep. infantis_M	Tumour	8451	79	Male	Oral cancer	Tongue	NA	Nill	1804609	39.4682	1688	3.6365	2.47556	Sensitive	Sensitive
8514A4	Streptococcus	Strep. vestibularis	1	Strep. vestibularis	Oral cavity	8514	75	Male	Laryngeal cancer	Glottis	cT4aN2b	Nill	2002878	39.5293	1880	3.60383	1.67256	Sensitive	Sensitive
8543AN1	Streptococcus	Strep. anginosus	3	Strep. anginosus	Oral cavity	8543	60	Male	Oropharyngeal cancer	Tonsil	NA	Heavy smoker	2021633	38.8535	1970	3.56779	2.58649	Sensitive	Sensitive
8512AN4	Streptococcus	Strep. anginosus	3	Strep. anginosus	Oral cavity	8512	57	Male	Oral cancer	Tongue	T4aN2c	Heavy smoker	1994571	38.8404	1899	3.4613	1.58281	Sensitive	Sensitive
8451DM9	Streptococcus	Strep. mitis	4	Strep. mitis	Tumour	8451	79	Male	Oral cancer	Tongue	NA	Nill	1946573	40.2327	1823	3.26862	1.86499	Sensitive	Sensitive
8324OA8	Streptococcus	Strep.BHI_3	7	Strep.BHI_3	Oral cavity	8324	68	Male	Salivary gland cancer	Parotid gland	T4a - invades skin	Yes	2044010	39.6379	1876	3.1053	1.65478	Sensitive	Sensitive
8514AN3	Streptococcus	Strep. hominis	3	Strep. hominis	Oral cavity	8514	75	Male	Laryngeal cancer	Glottis	cT4aN2b	Nill	1879474	38.7398	1773	3.05735	3.13735	Sensitive	Sensitive
8607AN3	Streptococcus	Strep. anginosus	3	Strep. anginosus	Oral cavity	8607	65	Male	Oral cancer	Tongue	T4N1 P16+	Yes	2167350	38.3608	2083	2.79132	2.72688	Sensitive	Sensitive
8468DM2	Streptococcus	Strep. cristatus	5	Strep. cristatus_J	Tumour	8468	59	Male	Oral cancer	Mouth	NA	Nill	2187039	41.8515	2131	2.73591	0.871714	Sensitive	Sensitive
8514A11	Streptococcus	Strep. oralis	6	Strep. oralis_BW	Oral cavity	8514	75	Male	Laryngeal cancer	Glottis	cT4aN2b	Nill	1861138	41.3561	1743	2.69352	1.09525	Sensitive	Sensitive
8305AN4	Streptococcus	Strep.BHI_1	4	Strep.BHI_1	Oral cavity	8305	73	Male	Salivary gland cancer	Parotid gland	NA	Nill	1937395	40.3134	1838	2.63299	2.84589	Sensitive	Sensitive
8633AN2	Streptococcus	Strep. anginosus	3	Strep. anginosus	Oral cavity	8633	59	Male	Oral cancer	Tongue	pT3N0Mx	Yes	1953079	39.0028	1871	2.61293	2.18297	Sensitive	Sensitive
8543AN4	Streptococcus	Strep. constellatus	3	Strep. constellatus	Oral cavity	8543	60	Male	Oropharyngeal cancer	Tonsil	NA	Heavy smoker	1859388	38.0227	1729	2.30889	1.98373	Sensitive	Sensitive
8543A7	Streptococcus	Strep. mitis	4	Strep. mitis_BX	Oral cavity	8543	60	Male	Oropharyngeal cancer	Tonsil	NA	Heavy smoker	2000294	40.1019	1892	1.31359	0.611367	Sensitive	Sensitive
8524AN6	Streptococcus	Strep. mitis	4	Strep. mitis	Oral cavity	8524	71	Male	Oral cancer	Tongue	pT2N2bM0	Heavy smoker	1942870	40.2094	1827	1.25903	0.691397	Sensitive	Sensitive
8507K3	Streptococcus	Strep. anginosus	3	Strep. anginosus	Oral cavity	8507	58	Female	Oral cancer	FOM	cT3N0	Heavy smoker	1961331	38.686	1915	1.2436	0.572318	Sensitive	Sensitive
8514A8	Streptococcus	Strep. parasanguinis	2	Strep. parasanguinis	Oral cavity	8514	75	Male	Laryngeal cancer	Glottis	cT4aN2b	Nill	2250528	41.4755	2055	1.19532	0.583664	Sensitive	Sensitive
8389S2	Streptococcus	Strep. oralis	6	Strep. oralis_AC	Oral cavity	8389	73	Male	Nasopharyngeal cancer	Sinus	NA	Heavy smoker	2037386	40.9778	1971	1.13433	0.875095	Sensitive	Sensitive
8691AN1	Streptococcus	Strep. mitis	4	Strep. mitis_AT	Oral cavity	8691	76	Male	Oral cancer	Tongue	pT2N0Mx	Nill	2028049	40.1258	1918	0.981994	1.07952	Sensitive	Sensitive

## Sheet: heatmap_MIC
isolate_id	Species	5-FU MIC (μg/ml)	Viability (%)	sd
8355A1	Strep. salivarius	> 1000	49.939	15.6182
8355AN2	Strep. salivarius	> 1000	59.1056	12.9678
8421OA3	Strep. salivarius	> 1000	45.1752	7.09908
8457AT2	Strep. salivarius	> 1000	43.4145	7.65398
8462T2	Strep.BHI_7	> 1000	44.2327	9.51166
8468DM31	Strep.BHI_8	> 1000	47.1033	2.78206
8497OA7	Strep. salivarius	> 1000	59.3897	13.8918
8511A7	Strep. parasanguinis	> 1000	48.5749	13.3062
8513A4	Strep. oralis	> 1000	45.3237	12.5402
8513A7	Strep. mutans	> 1000	38.9708	11.5131
8514A7	Strep. caecimuris	> 1000	47.7911	7.2714
8408OA3	Strep. parasanguinis	1000	30.3217	5.35886
8420OA2	Strep. oralis	1000	21.3554	4.46556
8451ANT1	Strep.BHI_5	1000	35.0889	11.927
8468OAN3	Strep. infantis	1000	28.4553	3.96835
8515A8	Strep. oralis	1000	25.897	4.31915
8691DM4	Strep. xiaochunlingii	1000	23.7268	4.41108
8324OAN8	Strep. parasanguinis	500	7.74992	3.35624
8355AN1	Strep. infantis	500	20.2235	7.09815
8389SA4	Strep. sp001556435	500	11.2883	2.0533
8420OA3	Strep. hominis	500	17.7402	7.3712
8431AN1	Strep. mitis	500	17.4485	1.02769
8451ANG2	Strep. gordonii	500	18.3411	4.07858
8451ANT4	Strep. infantis	500	18.66	5.37849
8451AT5	Strep. infantis	500	19.2285	4.68884
8451DM12	Strep. gordonii	500	14.5106	2.9409
8457OAN3	Strep. infantis	500	10.2037	3.58309
8468OAN1	Strep. xiaochunlingii	500	13.056	3.47797
8485AN1	Strep. hominis	500	10.1079	5.54173
8485AN10	Strep. hominis	500	15.0047	3.83228
8485AN4	Strep. sp901875575	500	10.7367	2.17924
8497OA8	Strep. parasanguinis	500	18.1339	7.71141
8498AN14.3	Strep. mitis	500	15.24	8.69493
8498AN8	Strep. massiliensis	500	14.7432	4.94738
8507OA5	Strep. sp001813105	500	12.6189	3.90799
8507OAN12	Strep.BHI_8	500	17.8374	5.61939
8511A8	Strep. oralis	500	20.0903	2.06061
8511AN11	Strep. anginosus	500	19.5518	3.56677
8512A8	Strep. mitis	500	17.4113	3.74064
8513A11	Strep.BHI_10	500	15.9343	6.93799
8513A12	Strep. constellatus	500	15.208	4.50254
8513A9	Strep. mitis	500	17.1928	2.41185
8513AN9.2	Strep. constellatus	500	19.6841	4.93007
8515AN11	Strep. sp029691405	500	10.5686	0.840474
8524AN8	Strep. constellatus	500	13.51	1.45974
8633AN4	Strep.BHI_11	500	16.7599	3.28183
8633TD5	Strep. sinensis	500	11.5822	2.44355
8676A3	Strep. mitis	500	17.0964	6.28102
8676AN5	Strep. mitis	500	18.5948	5.69016
8676AN8	Strep. pseudopneumoniae	500	16.9678	2.69826
8485DM3	Strep. parasanguinis	250	9.6736	7.6916
8512A6.2	Strep. parasanguinis	250	8.43921	2.85592
8498OA9	Strep. oralis	125	9.6785	2.23516
8511A3	Strep. salivarius	125	1.05306	0.46792
8514A6	Strep. vestibularis	125	2.98692	1.54671
8389O4	Strep. sp013394695	64	5.67081	2.33932
8451DM4	Strep. oralis	64	6.20754	2.11682
8451DM8	Strep. hominis	64	8.58597	1.2132
8457OAN1	Strep. sp002238115	64	9.63313	3.74118
8468DM2	Strep. cristatus	64	2.73591	0.871714
8484A8	Strep. mitis	64	9.20565	2.1112
8485A2	Strep.BHI_9	64	9.53516	0.880979
8507K3	Strep. anginosus	64	1.2436	0.572318
8511AN3	Strep. hominis	64	9.32292	1.71643
8512AN2	Strep. anginosus	64	8.79432	1.27562
8515AN14	Strep. gordonii	64	5.75184	3.09476
8515AN6	Strep. sanguinis	64	5.24931	2.16678
8691AN2	Strep. gordonii	64	7.92724	2.26888
8514A8	Strep. parasanguinis	32	8.81853	4.56942
8514A9	Strep. parasanguinis	32	6.74907	1.09598
8543A7	Strep. mitis	32	6.76697	0.975925
8543AN1	Strep. anginosus	32	6.91491	1.83477
8543AN4	Strep. constellatus	32	6.07785	2.15848
8676A7	Strep. gordonii	32	7.85349	2.04592
8513A10	Strep. gordonii	16	4.70533	3.88223
8514AN3	Strep. hominis	16	4.82688	5.00599
8633AN2	Strep. anginosus	16	3.03052	2.83859
8691AN1	Strep. mitis	8	1.6849	1.46108
8305AN4	Strep.BHI_1	0	4.51442	4.99624
8305OA4	Strep.BHI_2	0	7.05122	4.42991
8324OA8	Strep.BHI_3	0	3.73421	2.79306
8389S2	Strep. oralis	0	7.13348	0.939511
8421A4	Strep. parasanguinis	0	5.09183	2.33939
8431AN6	Strep.BHI_4	0	4.2595	1.16966
8451AG2	Strep. infantis	0	4.52374	1.73795
8451AT6	Strep. infantis	0	4.57165	3.16407
8451AT7	Strep. sanguinis	0	6.03397	1.9257
8451AT8	Strep.BHI_6	0	4.62192	2.38302
8451DM9	Strep. mitis	0	3.03164	1.37021
8457OAN4	Strep. infantis	0	7.48658	2.12205
8468AN4	Strep. rubneri	0	8.16105	2.17275
8484A3	Strep. mitis	0	6.27915	5.48414
8497AN4	Strep. mitis	0	7.12525	2.89755
8512AN4	Strep. anginosus	0	4.31766	2.2455
8514A10	Strep. vestibularis	0	6.51801	1.58249
8514A11	Strep. sp029691405	0	6.52154	1.08348
8514A4	Strep. vestibularis	0	3.73426	1.81369
8524A10	Strep. mitis	0	6.57735	1.23801
8524AN5	Strep. mitis	0	7.73549	1.59442
8524AN6	Strep. mitis	0	2.68817	1.65849
8607AN3	Strep. anginosus	0	4.47729	3.51734
