# Supplementary material
Source: Research Square preprint supplement (doi:10.21203/rs.3.rs-8825984/v1)
Supplement: Supplementary file 4 [file 5f26ef269bd7d9f16c200c39.xlsx]

## Sheet: CARD
Resistance_Gene	resistant_present	resistant_absent	sensitive_present	sensitive_absent	fisher_test	p_value	odds_ratio	FDR	freq_diff	significance	ARO
AAC(3)-IIIa	4	52	4	41		1	0.79034	1	-0.0174603	Not significant	ARO:3002536
AAC(3)-IIa	1	55	4	41		0.168988	0.189235	1	-0.0710317	Not significant	ARO:3002533
AAC(3)-IIb	4	52	4	41		1	0.79034	1	-0.0174603	Not significant	ARO:3002534
AAC(3)-IIc	1	55	4	41		0.168988	0.189235	1	-0.0710317	Not significant	ARO:3002535
AAC(3)-IId	1	55	4	41		0.168988	0.189235	1	-0.0710317	Not significant	ARO:3004623
AAC(3)-IIe	1	55	4	41		0.168988	0.189235	1	-0.0710317	Not significant	ARO:3004621
AAC(3)-IVa	4	52	4	41		1	0.79034	1	-0.0174603	Not significant	ARO:3002539
AAC(3)-IVb	4	52	4	41		1	0.79034	1	-0.0174603	Not significant	ARO:3005061
AAC(3)-IXa	4	52	4	41		1	0.79034	1	-0.0174603	Not significant	ARO:3002543
AAC(3)-VIa	4	52	4	41		1	0.79034	1	-0.0174603	Not significant	ARO:3002540
AAC(3)-Xa	4	52	4	41		1	0.79034	1	-0.0174603	Not significant	ARO:3002544
AAC(6')-I-48	7	49	10	35		0.284584	0.503501	1	-0.0972222	Not significant	ARO:3004638
AAC(6')-Iaa	1	55	0	45		1	Inf	1	0.0178571	Not significant	ARO:3002571
AAC(6')-Iad	25	31	17	28		0.545481	1.32453	1	0.0686508	Not significant	ARO:3002572
AAC(6')-Iaj	6	50	1	44		0.12759	5.20983	1	0.0849206	Not significant	ARO:3003677
AAC(6')-Ic	19	37	7	38		0.0415696	2.76008	0.978707	0.18373	Enriched in Resistant	ARO:3002549
AAC(6')-If	1	55	0	45		1	Inf	1	0.0178571	Not significant	ARO:3002553
AAC(6')-Ig	2	54	0	45		0.50099	Inf	1	0.0357143	Not significant	ARO:3002554
AAC(6')-Ih	3	53	1	44		0.626591	2.47015	1	0.0313492	Not significant	ARO:3002555
AAC(6')-Ij	3	53	1	44		0.626591	2.47015	1	0.0313492	Not significant	ARO:3002557
AAC(6')-Ik	4	52	1	44		0.377652	3.34922	1	0.0492063	Not significant	ARO:3002558
AAC(6')-Ir	3	53	1	44		0.626591	2.47015	1	0.0313492	Not significant	ARO:3002561
AAC(6')-Is	4	52	5	40		0.506847	0.618397	1	-0.0396825	Not significant	ARO:3002562
AAC(6')-It	3	53	1	44		0.626591	2.47015	1	0.0313492	Not significant	ARO:3002564
AAC(6')-Iu	4	52	5	40		0.506847	0.618397	1	-0.0396825	Not significant	ARO:3002565
AAC(6')-Iv	4	52	1	44		0.377652	3.34922	1	0.0492063	Not significant	ARO:3002566
AAC(6')-Iw	4	52	5	40		0.506847	0.618397	1	-0.0396825	Not significant	ARO:3002567
AAC(6')-Ix	4	52	5	40		0.506847	0.618397	1	-0.0396825	Not significant	ARO:3002568
AAC(6')-Iy	1	55	0	45		1	Inf	1	0.0178571	Not significant	ARO:3002569
ACT-106	1	55	0	45		1	Inf	1	0.0178571	Not significant	ARO:3007889
ACT-108	1	55	0	45		1	Inf	1	0.0178571	Not significant	ARO:3007891
ACT-113	1	55	0	45		1	Inf	1	0.0178571	Not significant	ARO:3007896
ACT-144	1	55	0	45		1	Inf	1	0.0178571	Not significant	ARO:3007912
ACT-151	1	55	0	45		1	Inf	1	0.0178571	Not significant	ARO:3007917
ACT-155	1	55	0	45		1	Inf	1	0.0178571	Not significant	ARO:3007920
ACT-157	1	55	0	45		1	Inf	1	0.0178571	Not significant	ARO:3007922
ACT-158	1	55	0	45		1	Inf	1	0.0178571	Not significant	ARO:3007923
ACT-16	1	55	0	45		1	Inf	1	0.0178571	Not significant	ARO:3001827
ACT-174	1	55	0	45		1	Inf	1	0.0178571	Not significant	ARO:3007937
ACT-184	1	55	0	45		1	Inf	1	0.0178571	Not significant	ARO:3007947
ACT-20	1	55	0	45		1	Inf	1	0.0178571	Not significant	ARO:3001841
ACT-25	1	55	0	45		1	Inf	1	0.0178571	Not significant	ARO:3001845
ACT-31	1	55	0	45		1	Inf	1	0.0178571	Not significant	ARO:3001851
ACT-35	1	55	0	45		1	Inf	1	0.0178571	Not significant	ARO:3001855
ACT-43	1	55	0	45		1	Inf	1	0.0178571	Not significant	ARO:3006238
ACT-55	1	55	0	45		1	Inf	1	0.0178571	Not significant	ARO:3006250
ACT-60	1	55	0	45		1	Inf	1	0.0178571	Not significant	ARO:3006255
ACT-69	1	55	0	45		1	Inf	1	0.0178571	Not significant	ARO:3006264
ACT-70	1	55	0	45		1	Inf	1	0.0178571	Not significant	ARO:3006265
ACT-83	1	55	0	45		1	Inf	1	0.0178571	Not significant	ARO:3006277
ACT-84	1	55	0	45		1	Inf	1	0.0178571	Not significant	ARO:3006278
ACT-85	1	55	0	45		1	Inf	1	0.0178571	Not significant	ARO:3007958
ACT-86	1	55	0	45		1	Inf	1	0.0178571	Not significant	ARO:3007959
ACT-90	1	55	0	45		1	Inf	1	0.0178571	Not significant	ARO:3007962
ADC-272	0	56	1	44		0.445545	0	1	-0.0222222	Not significant	ARO:3007988
ADC-288	0	56	1	44		0.445545	0	1	-0.0222222	Not significant	ARO:3008004
ADC-84	0	56	1	44		0.445545	0	1	-0.0222222	Not significant	ARO:3006441
ANT(6)-Ia	46	10	42	3		0.136126	0.33192	1	-0.111905	Not significant	ARO:3002626
ANT(6)-Ib	24	32	20	25		1	0.938104	1	-0.015873	Not significant	ARO:3002629
APH(3'')-Ia	1	55	0	45		1	Inf	1	0.0178571	Not significant	ARO:3002638
APH(3')-IIIa	1	55	0	45		1	Inf	1	0.0178571	Not significant	ARO:3002647
APH(3')-IIa	6	50	4	41		1	1.22751	1	0.018254	Not significant	ARO:3002644
APH(3')-IIb	0	56	3	42		0.0851485	0	1	-0.0666667	Not significant	ARO:3002645
APH(3')-IVa	16	40	9	36		0.36117	1.59264	1	0.0857143	Not significant	ARO:3002648
APH(3')-IXa	1	55	0	45		1	Inf	1	0.0178571	Not significant	ARO:3004087
APH(3')-VIIIa	1	55	0	45		1	Inf	1	0.0178571	Not significant	ARO:3004680
APH(3')-VIIIb	1	55	0	45		1	Inf	1	0.0178571	Not significant	ARO:3004086
APH(3')-VIIa	1	55	0	45		1	Inf	1	0.0178571	Not significant	ARO:3002654
APH(3')-VIa	1	55	0	45		1	Inf	1	0.0178571	Not significant	ARO:3002652
APH(3')-VIb	1	55	0	45		1	Inf	1	0.0178571	Not significant	ARO:3002653
APH(3')-Va	1	55	0	45		1	Inf	1	0.0178571	Not significant	ARO:3002649
APH(3')-Vc	1	55	0	45		1	Inf	1	0.0178571	Not significant	ARO:3002651
Abau_AbaF	7	49	8	37		0.575941	0.663478	1	-0.0527778	Not significant	ARO:3004573
AcrS	6	50	9	36		0.261704	0.483556	1	-0.0928571	Not significant	ARO:3000656
Afab_ACT_CHL	12	44	1	44		0.00543228	11.7819	0.670224	0.192063	Enriched in Resistant	ARO:3004451
Bado_rpoB_RIF	56	0	45	0		1	0	1	0	Not significant	ARO:3004480
Bbif_ileS_MUP	44	12	37	8		0.802564	0.794605	1	-0.0365079	Not significant	ARO:3003730
Bsub_mprF	12	44	3	42		0.0494731	3.77249	0.978707	0.147619	Enriched in Resistant	ARO:3003324
Bsui_mprF	9	47	2	43		0.105575	4.06739	1	0.11627	Not significant	ARO:3003772
CAR-1	2	54	1	44		1	1.62208	1	0.0134921	Not significant	ARO:3006903
CMA-1	0	56	1	44		0.445545	0	1	-0.0222222	Not significant	ARO:3006922
CMA-2	0	56	1	44		0.445545	0	1	-0.0222222	Not significant	ARO:3006923
CSA-1	0	56	1	44		0.445545	0	1	-0.0222222	Not significant	ARO:3006869
CSA-2	0	56	1	44		0.445545	0	1	-0.0222222	Not significant	ARO:3006870
Cper_cplR	56	0	45	0		1	0	1	0	Not significant	ARO:3007644
Cper_mprF	12	44	3	42		0.0494731	3.77249	0.978707	0.147619	Enriched in Resistant	ARO:3003773
Cspo_cplR	56	0	45	0		1	0	1	0	Not significant	ARO:3007645
Cstr_tetA	56	0	45	0		1	0	1	0	Not significant	ARO:3004639
Ctra_murA_FOF	56	0	45	0		1	0	1	0	Not significant	ARO:3003785
DfrA36	25	31	22	23		0.692872	0.844541	1	-0.0424603	Not significant	ARO:3005348
DfrA37	1	55	0	45		1	Inf	1	0.0178571	Not significant	ARO:3005347
DfrA38	29	27	20	25		0.5491	1.33865	1	0.0734127	Not significant	ARO:3005349
DfrA39	25	31	23	22		0.552555	0.77339	1	-0.0646825	Not significant	ARO:3005351
Ecol_emrE	10	46	4	41		0.252419	2.2115	1	0.0896825	Not significant	ARO:3004039
Ecol_mdfA	1	55	0	45		1	Inf	1	0.0178571	Not significant	ARO:3001328
EdeQ	12	44	10	35		1	0.954958	1	-0.00793651	Not significant	ARO:3004063
Erm(30)	56	0	45	0		1	0	1	0	Not significant	ARO:3001265
Erm(31)	0	56	2	43		0.19604	0	1	-0.0444444	Not significant	ARO:3000598
Erm(33)	3	53	3	42		1	0.7943	1	-0.0130952	Not significant	ARO:3000599
Erm(34)	29	27	20	25		0.5491	1.33865	1	0.0734127	Not significant	ARO:3000600
Erm(36)	3	53	3	42		1	0.7943	1	-0.0130952	Not significant	ARO:3000605
Erm(39)	3	53	3	42		1	0.7943	1	-0.0130952	Not significant	ARO:3000602
Erm(43)	3	53	3	42		1	0.7943	1	-0.0130952	Not significant	ARO:3003205
Erm(44)v	3	53	3	42		1	0.7943	1	-0.0130952	Not significant	ARO:3003971
Erm(47)	3	53	3	42		1	0.7943	1	-0.0130952	Not significant	ARO:3003908
Erm(48)	46	10	42	3		0.136126	0.33192	1	-0.111905	Not significant	ARO:3004094
Erm(50)	3	53	3	42		1	0.7943	1	-0.0130952	Not significant	ARO:3007032
Erm(K)	9	47	3	42		0.217489	2.65674	1	0.0940476	Not significant	ARO:3004643
ErmA	3	53	3	42		1	0.7943	1	-0.0130952	Not significant	ARO:3000347
ErmB	3	53	3	42		1	0.7943	1	-0.0130952	Not significant	ARO:3000375
ErmC	3	53	3	42		1	0.7943	1	-0.0130952	Not significant	ARO:3000250
ErmD	4	52	5	40		0.506847	0.618397	1	-0.0396825	Not significant	ARO:3000495
ErmE	9	47	3	42		0.217489	2.65674	1	0.0940476	Not significant	ARO:3000326
ErmF	3	53	3	42		1	0.7943	1	-0.0130952	Not significant	ARO:3000498
ErmG	3	53	3	42		1	0.7943	1	-0.0130952	Not significant	ARO:3000522
ErmH	22	34	23	22		0.314049	0.621893	1	-0.118254	Not significant	ARO:3002823
ErmQ	3	53	3	42		1	0.7943	1	-0.0130952	Not significant	ARO:3000593
ErmR	0	56	1	44		0.445545	0	1	-0.0222222	Not significant	ARO:3000594
ErmS	8	48	0	45		0.00809542	Inf	0.670224	0.142857	Enriched in Resistant	ARO:3001304
ErmT	3	53	3	42		1	0.7943	1	-0.0130952	Not significant	ARO:3000595
ErmV	1	55	2	43		0.584158	0.394511	1	-0.0265873	Not significant	ARO:3002824
ErmX	3	53	3	42		1	0.7943	1	-0.0130952	Not significant	ARO:3000596
ErmY	3	53	3	42		1	0.7943	1	-0.0130952	Not significant	ARO:3002825
FOX-18	0	56	1	44		0.445545	0	1	-0.0222222	Not significant	ARO:3008180
FosB1	13	43	13	32		0.647674	0.746397	1	-0.056746	Not significant	ARO:3004670
FosB3	11	45	12	33		0.476943	0.67492	1	-0.0702381	Not significant	ARO:3002873
FosB4	11	45	12	33		0.476943	0.67492	1	-0.0702381	Not significant	ARO:3004671
FosB6	5	51	3	42		0.729215	1.36833	1	0.022619	Not significant	ARO:3004673
IreK	56	0	45	0		1	0	1	0	Not significant	ARO:3007678
Kpne_KpnE	7	49	1	44		0.0723103	6.1957	1	0.102778	Not significant	ARO:3004580
Kpne_KpnH	5	51	3	42		0.729215	1.36833	1	0.022619	Not significant	ARO:3004597
Lmon_mprF	12	44	3	42		0.0494731	3.77249	0.978707	0.147619	Enriched in Resistant	ARO:3003770
LnuP	0	56	1	44		0.445545	0	1	-0.0222222	Not significant	ARO:3004601
LpsB	7	49	4	41		0.750418	1.45888	1	0.0361111	Not significant	ARO:3005051
MCR-10.2	1	55	0	45		1	Inf	1	0.0178571	Not significant	ARO:3007277
MCR-10.3	1	55	0	45		1	Inf	1	0.0178571	Not significant	ARO:3007275
MCR-10.4	1	55	0	45		1	Inf	1	0.0178571	Not significant	ARO:3007276
MCR-10.5	1	55	0	45		1	Inf	1	0.0178571	Not significant	ARO:3007274
MCR-9.1	1	55	0	45		1	Inf	1	0.0178571	Not significant	ARO:3004684
MdtK	9	47	9	36		0.613226	0.768008	1	-0.0392857	Not significant	ARO:3001327
MecI_rep	2	54	1	44		1	1.62208	1	0.0134921	Not significant	ARO:3005046
NWM-1	1	55	0	45		1	Inf	1	0.0178571	Not significant	ARO:3007848
PNC-1	0	56	1	44		0.445545	0	1	-0.0222222	Not significant	ARO:3009032
PNC-2	0	56	1	44		0.445545	0	1	-0.0222222	Not significant	ARO:3009033
PNC-3	0	56	1	44		0.445545	0	1	-0.0222222	Not significant	ARO:3009034
Paer_CpxR	56	0	45	0		1	0	1	0	Not significant	ARO:3004054
Paer_catB6	12	44	1	44		0.00543228	11.7819	0.670224	0.192063	Enriched in Resistant	ARO:3002678
Paer_catB7	5	51	1	44		0.221664	4.26175	1	0.0670635	Not significant	ARO:3002679
Paer_emrE	10	46	3	42		0.136126	3.01278	1	0.111905	Not significant	ARO:3004038
ParR	56	0	45	0		1	0	1	0	Not significant	ARO:3005068
ParS	22	34	20	25		0.685878	0.810537	1	-0.0515873	Not significant	ARO:3005067
Pmir_dfrA6	25	31	21	24		0.843845	0.922405	1	-0.0202381	Not significant	ARO:3004644
PmpM	2	54	6	39		0.134377	0.244052	1	-0.097619	Not significant	ARO:3004077
PmrF	53	3	42	3		1	1.25897	1	0.0130952	Not significant	ARO:3003578
RATA-2	8	48	2	43		0.178295	3.54374	1	0.0984127	Not significant	ARO:3007802
RanA	56	0	45	0		1	0	1	0	Not significant	ARO:3005091
Rfas_cmr	2	54	0	45		0.50099	Inf	1	0.0357143	Not significant	ARO:3002701
RlmA(II)	55	1	45	0		1	0	1	-0.0178571	Not significant	ARO:3001301
Rv1877	3	53	0	45		0.251485	Inf	1	0.0535714	Not significant	ARO:3007662
SAT-4	3	53	2	43		1	1.21464	1	0.00912698	Not significant	ARO:3002897
Saga_mprF	12	44	3	42		0.0494731	3.77249	0.978707	0.147619	Enriched in Resistant	ARO:3003774
Saur_LmrS	28	28	21	24		0.841756	1.14134	1	0.0333333	Not significant	ARO:3004572
Saur_mupA_MUP	56	0	45	0		1	0	1	0	Not significant	ARO:3000521
Saur_mupB_MUP	56	0	45	0		1	0	1	0	Not significant	ARO:3000510
Saur_norA	1	55	3	42		0.321075	0.257842	1	-0.0488095	Not significant	ARO:3004667
Scoh_vga(E)	56	0	45	0		1	0	1	0	Not significant	ARO:3004715
Sent_cmlA	2	54	0	45		0.50099	Inf	1	0.0357143	Not significant	ARO:3002691
Sfra_tlrB_TYL	24	32	8	37		0.00956341	3.42634	0.670224	0.250794	Enriched in Resistant	ARO:3001299
Spyo_ErmA_MLSb	3	53	3	42		1	0.7943	1	-0.0130952	Not significant	ARO:3005099
TaeA	56	0	45	0		1	0	1	0	Not significant	ARO:3003986
ThfT	8	48	10	35		0.311425	0.586521	1	-0.0793651	Not significant	ARO:3007427
TxR	1	55	0	45		1	Inf	1	0.0178571	Not significant	ARO:3005008
VatI	9	47	1	44		0.0396248	8.2905	0.978707	0.138492	Enriched in Resistant	ARO:3003987
YajC	8	48	3	42		0.337261	2.31503	1	0.0761905	Not significant	ARO:3005040
YojI	49	7	41	4		0.750418	0.685457	1	-0.0361111	Not significant	ARO:3003952
aad(6)	46	10	42	3		0.136126	0.33192	1	-0.111905	Not significant	ARO:3002628
aadK	46	10	42	3		0.136126	0.33192	1	-0.111905	Not significant	ARO:3002627
aadT	3	53	3	42		1	0.7943	1	-0.0130952	Not significant	ARO:3007669
abcA	14	42	4	41		0.0399882	3.37805	0.978707	0.161111	Enriched in Resistant	ARO:3003942
abeM	7	49	5	40		1	1.14136	1	0.0138889	Not significant	ARO:3000753
abeS	3	53	3	42		1	0.7943	1	-0.0130952	Not significant	ARO:3000768
adeL	1	55	0	45		1	Inf	1	0.0178571	Not significant	ARO:3000620
adeN	2	54	6	39		0.134377	0.244052	1	-0.097619	Not significant	ARO:3000559
adeR	56	0	45	0		1	0	1	0	Not significant	ARO:3000553
adeS	3	53	3	42		1	0.7943	1	-0.0130952	Not significant	ARO:3000549
almE	2	54	2	43		1	0.798113	1	-0.00873016	Not significant	ARO:3007433
aphA15	1	55	0	45		1	Inf	1	0.0178571	Not significant	ARO:3004675
arlR	56	0	45	0		1	0	1	0	Not significant	ARO:3000838
arlS	56	0	45	0		1	0	1	0	Not significant	ARO:3000839
bacA	56	0	44	1		0.445545	Inf	1	0.0222222	Not significant	ARO:3002986
basS	4	52	0	45		0.12645	Inf	1	0.0714286	Not significant	ARO:3003583
bcr-1	3	53	0	45		0.251485	Inf	1	0.0535714	Not significant	ARO:3003801
bcrA	56	0	45	0		1	0	1	0	Not significant	ARO:3002987
bcrC	4	52	2	43		0.689628	1.64593	1	0.0269841	Not significant	ARO:3003250
blt	8	48	3	42		0.337261	2.31503	1	0.0761905	Not significant	ARO:3003006
bmr	23	33	20	25		0.840014	0.872407	1	-0.0337302	Not significant	ARO:3003007
carA	56	0	45	0		1	0	1	0	Not significant	ARO:3002817
catB10	9	47	1	44		0.0396248	8.2905	0.978707	0.138492	Enriched in Resistant	ARO:3003110
catB11	9	47	1	44		0.0396248	8.2905	0.978707	0.138492	Enriched in Resistant	ARO:3004660
catB2	9	47	1	44		0.0396248	8.2905	0.978707	0.138492	Enriched in Resistant	ARO:3002675
catB3	9	47	1	44		0.0396248	8.2905	0.978707	0.138492	Enriched in Resistant	ARO:3002676
catB8	30	26	28	17		0.422835	0.703038	1	-0.0865079	Not significant	ARO:3002680
catB9	2	54	0	45		0.50099	Inf	1	0.0357143	Not significant	ARO:3002681
cdeA	4	52	4	41		1	0.79034	1	-0.0174603	Not significant	ARO:3003835
cfr(B)	46	10	39	6		0.593555	0.710085	1	-0.0452381	Not significant	ARO:3004649
cfrA	1	55	1	44		1	0.801788	1	-0.00436508	Not significant	ARO:3003441
chrB	17	39	7	38		0.102131	2.34668	1	0.148016	Not significant	ARO:3001302
clbA	47	9	39	6		0.783341	0.805147	1	-0.027381	Not significant	ARO:3002814
clcD	46	10	39	6		0.593555	0.710085	1	-0.0452381	Not significant	ARO:3004599
cmeR	1	55	5	40		0.0860322	0.147934	1	-0.093254	Not significant	ARO:3000526
cmlA1	2	54	0	45		0.50099	Inf	1	0.0357143	Not significant	ARO:3002693
cmlA4	3	53	0	45		0.251485	Inf	1	0.0535714	Not significant	ARO:3002694
cmlA5	2	54	0	45		0.50099	Inf	1	0.0357143	Not significant	ARO:3002695
cmlA6	3	53	0	45		0.251485	Inf	1	0.0535714	Not significant	ARO:3002696
cmlA8	2	54	0	45		0.50099	Inf	1	0.0357143	Not significant	ARO:3004665
cmlA9	2	54	0	45		0.50099	Inf	1	0.0357143	Not significant	ARO:3005043
cmlB	2	54	0	45		0.50099	Inf	1	0.0357143	Not significant	ARO:3002698
cmlB1	2	54	0	45		0.50099	Inf	1	0.0357143	Not significant	ARO:3002699
cmlv	2	54	0	45		0.50099	Inf	1	0.0357143	Not significant	ARO:3002700
cplR	56	0	45	0		1	0	1	0	Not significant	ARO:3007637
cprR	56	0	45	0		1	0	1	0	Not significant	ARO:3005063
dfr22	28	28	27	18		0.421581	0.669374	1	-0.1	Not significant	ARO:3005354
dfrA12	25	31	22	23		0.692872	0.844541	1	-0.0424603	Not significant	ARO:3002858
dfrA13	28	28	27	18		0.421581	0.669374	1	-0.1	Not significant	ARO:3003012
dfrA20	31	25	20	25		0.319799	1.54319	1	0.109127	Not significant	ARO:3003016
dfrA21	25	31	21	24		0.843845	0.922405	1	-0.0202381	Not significant	ARO:3003017
dfrA22	25	31	21	24		0.843845	0.922405	1	-0.0202381	Not significant	ARO:3003018
dfrA24	0	56	1	44		0.445545	0	1	-0.0222222	Not significant	ARO:3002856
dfrA26	35	21	26	19		0.684968	1.21556	1	0.0472222	Not significant	ARO:3002857
dfrA3	56	0	45	0		1	0	1	0	Not significant	ARO:3003105
dfrA31	25	31	21	24		0.843845	0.922405	1	-0.0202381	Not significant	ARO:3005084
dfrA35	28	28	24	21		0.841756	0.87616	1	-0.0333333	Not significant	ARO:3005164
dfrA6	25	31	21	24		0.843845	0.922405	1	-0.0202381	Not significant	ARO:3004547
dfrC	37	19	38	7		0.0415696	0.362309	0.978707	-0.18373	Enriched in Sensitive	ARO:3002865
dfrD	9	47	8	37		1	0.88671	1	-0.0170635	Not significant	ARO:3002866
dfrE	43	13	43	2		0.0103111	0.156301	0.670224	-0.187698	Enriched in Sensitive	ARO:3002875
dfrF	7	49	10	35		0.284584	0.503501	1	-0.0972222	Not significant	ARO:3002867
dfrG	2	54	1	44		1	1.62208	1	0.0134921	Not significant	ARO:3002868
dfrI	25	31	21	24		0.843845	0.922405	1	-0.0202381	Not significant	ARO:3004645
dfrK	7	49	7	38		0.774453	0.777488	1	-0.0305556	Not significant	ARO:3002869
dfrL	10	46	16	29		0.0660092	0.397802	1	-0.176984	Not significant	ARO:3007456
efmA	38	18	26	19		0.30825	1.536	1	0.100794	Not significant	ARO:3003954
efpA	7	49	4	41		0.750418	1.45888	1	0.0361111	Not significant	ARO:3003955
efrA	56	0	45	0		1	0	1	0	Not significant	ARO:3003948
efrB	56	0	45	0		1	0	1	0	Not significant	ARO:3003949
emeA	0	56	1	44		0.445545	0	1	-0.0222222	Not significant	ARO:3003551
emrB	5	51	3	42		0.729215	1.36833	1	0.022619	Not significant	ARO:3000074
emrR	21	35	11	34		0.198976	1.84331	1	0.130556	Not significant	ARO:3000516
emrY	3	53	3	42		1	0.7943	1	-0.0130952	Not significant	ARO:3000254
erm(32)	24	32	8	37		0.00956341	3.42634	0.670224	0.250794	Enriched in Resistant	ARO:3004592
erm(45)	3	53	3	42		1	0.7943	1	-0.0130952	Not significant	ARO:3004595
erm(56)	3	53	3	42		1	0.7943	1	-0.0130952	Not significant	ARO:3007654
evgA	56	0	45	0		1	0	1	0	Not significant	ARO:3000832
evgS	56	0	45	0		1	0	1	0	Not significant	ARO:3000833
facT	2	54	3	42		0.653538	0.521931	1	-0.0309524	Not significant	ARO:3001313
farB	1	55	0	45		1	Inf	1	0.0178571	Not significant	ARO:3003962
fexA	2	54	0	45		0.50099	Inf	1	0.0357143	Not significant	ARO:3002704
floR	2	54	0	45		0.50099	Inf	1	0.0357143	Not significant	ARO:3002705
gimA	2	54	0	45		0.50099	Inf	1	0.0357143	Not significant	ARO:3000463
hmrM	5	51	7	38		0.362904	0.535583	1	-0.0662698	Not significant	ARO:3003953
hp1181	4	52	0	45		0.12645	Inf	1	0.0714286	Not significant	ARO:3003964
kdpD	21	35	22	23		0.31238	0.630231	1	-0.113889	Not significant	ARO:3004047
kdpE	56	0	45	0		1	0	1	0	Not significant	ARO:3003841
lin	56	0	45	0		1	0	1	0	Not significant	ARO:3004651
lmrB	25	31	14	31		0.217787	1.77548	1	0.135317	Not significant	ARO:3002813
lmrC	43	13	33	12		0.817182	1.20058	1	0.0345238	Not significant	ARO:3002881
lmrD	56	0	45	0		1	0	1	0	Not significant	ARO:3002882
lmrP	3	53	0	45		0.251485	Inf	1	0.0535714	Not significant	ARO:3003969
lnuC	0	56	1	44		0.445545	0	1	-0.0222222	Not significant	ARO:3002837
lnuD	0	56	1	44		0.445545	0	1	-0.0222222	Not significant	ARO:3002838
lsaA	56	0	45	0		1	0	1	0	Not significant	ARO:3000300
lsaB	56	0	45	0		1	0	1	0	Not significant	ARO:3003111
lsaC	55	1	43	2		0.584158	2.53478	1	0.0265873	Not significant	ARO:3003112
lsaD	56	0	45	0		1	0	1	0	Not significant	ARO:3005121
lsaE	56	0	45	0		1	0	1	0	Not significant	ARO:3003206
macB	56	0	45	0		1	0	1	0	Not significant	ARO:3000535
marA	3	53	8	37		0.0583858	0.265261	1	-0.124206	Not significant	ARO:3000263
mcr-10.1	1	55	0	45		1	Inf	1	0.0178571	Not significant	ARO:3007137
mdeA	16	40	5	40		0.0472416	3.16505	0.978707	0.174603	Enriched in Resistant	ARO:3007011
mdtG	53	3	42	3		1	1.25897	1	0.0130952	Not significant	ARO:3001329
mecI	12	44	5	40		0.192055	2.16568	1	0.103175	Not significant	ARO:3000124
mef(B)	36	20	24	21		0.310844	1.5678	1	0.109524	Not significant	ARO:3003107
mef(C)	33	23	22	23		0.324306	1.4939	1	0.100397	Not significant	ARO:3003745
mef(D)	47	9	33	12		0.223349	1.88676	1	0.105952	Not significant	ARO:3005089
mef(E)	39	17	31	14		1	1.03571	1	0.00753968	Not significant	ARO:3000614
mef(F)	47	9	33	12		0.223349	1.88676	1	0.105952	Not significant	ARO:3007044
mef(J)	39	17	28	17		0.526115	1.38823	1	0.0742063	Not significant	ARO:3007049
mel	35	21	24	21		0.418371	1.45281	1	0.0916667	Not significant	ARO:3000616
mepA	1	55	0	45		1	Inf	1	0.0178571	Not significant	ARO:3000026
mepR	2	54	0	45		0.50099	Inf	1	0.0357143	Not significant	ARO:3000746
mgtA	2	54	0	45		0.50099	Inf	1	0.0357143	Not significant	ARO:3000462
mreA	56	0	45	0		1	0	1	0	Not significant	ARO:3007050
msbA	56	0	45	0		1	0	1	0	Not significant	ARO:3003950
msr(G)	56	0	45	0		1	0	1	0	Not significant	ARO:3007042
msr(I)	56	0	45	0		1	0	1	0	Not significant	ARO:3007043
msrA	56	0	45	0		1	0	1	0	Not significant	ARO:3000251
msrC	56	0	45	0		1	0	1	0	Not significant	ARO:3002819
msrE	56	0	45	0		1	0	1	0	Not significant	ARO:3003109
msrF	56	0	45	0		1	0	1	0	Not significant	ARO:3005087
msrH	56	0	45	0		1	0	1	0	Not significant	ARO:3005088
myrA	44	12	30	15		0.257912	1.82217	1	0.119048	Not significant	ARO:3001300
norB	16	40	5	40		0.0472416	3.16505	0.978707	0.174603	Enriched in Resistant	ARO:3000421
norC	8	48	0	45		0.00809542	Inf	0.670224	0.142857	Enriched in Resistant	ARO:3007010
novA	56	0	45	0		1	0	1	0	Not significant	ARO:3002522
oleB	56	0	45	0		1	0	1	0	Not significant	ARO:3003036
oleC	56	0	45	0		1	0	1	0	Not significant	ARO:3003748
oleD	1	55	0	45		1	Inf	1	0.0178571	Not significant	ARO:3000865
oleI	2	54	0	45		0.50099	Inf	1	0.0357143	Not significant	ARO:3000866
optrA	56	0	45	0		1	0	1	0	Not significant	ARO:3003746
otr(A)S.liv	56	0	45	0		1	0	1	0	Not significant	ARO:3007127
otr(A)S.rim	56	0	45	0		1	0	1	0	Not significant	ARO:3002891
otr(B)	9	47	4	41		0.375333	1.95022	1	0.0718254	Not significant	ARO:3002892
otr(C)	56	0	45	0		1	0	1	0	Not significant	ARO:3002894
patA	56	0	45	0		1	0	1	0	Not significant	ARO:3000024
patB	56	0	45	0		1	0	1	0	Not significant	ARO:3000025
pgpB	32	24	19	26		0.163332	1.81359	1	0.149206	Not significant	ARO:3003920
pmrA	53	3	42	3		1	1.25897	1	0.0130952	Not significant	ARO:3000822
poxtA	56	0	45	0		1	0	1	0	Not significant	ARO:3004470
pp-flo	2	54	0	45		0.50099	Inf	1	0.0357143	Not significant	ARO:3002812
qacE	10	46	4	41		0.252419	2.2115	1	0.0896825	Not significant	ARO:3005009
qacEdelta1	10	46	4	41		0.252419	2.2115	1	0.0896825	Not significant	ARO:3005010
qacG	10	46	4	41		0.252419	2.2115	1	0.0896825	Not significant	ARO:3007015
qacH	10	46	4	41		0.252419	2.2115	1	0.0896825	Not significant	ARO:3003836
qacJ	10	46	4	41		0.252419	2.2115	1	0.0896825	Not significant	ARO:3007014
qacL	10	46	3	42		0.136126	3.01278	1	0.111905	Not significant	ARO:3005098
ramA	17	39	13	32		1	1.0722	1	0.0146825	Not significant	ARO:3000823
rphA	1	55	0	45		1	Inf	1	0.0178571	Not significant	ARO:3000444
rphB	29	27	18	27		0.315843	1.60343	1	0.117857	Not significant	ARO:3003992
rpoB2	56	0	45	0		1	0	1	0	Not significant	ARO:3000501
salA	56	0	45	0		1	0	1	0	Not significant	ARO:3003749
salB	56	0	45	0		1	0	1	0	Not significant	ARO:3007026
salC	56	0	45	0		1	0	1	0	Not significant	ARO:3007027
salD	56	0	45	0		1	0	1	0	Not significant	ARO:3007028
salE	56	0	45	0		1	0	1	0	Not significant	ARO:3007029
sdrM	6	50	3	42		0.727468	1.67168	1	0.0404762	Not significant	ARO:3007013
smeR	56	0	45	0		1	0	1	0	Not significant	ARO:3003066
smeS	11	45	7	38		0.794311	1.32331	1	0.040873	Not significant	ARO:3003067
srmB	56	0	45	0		1	0	1	0	Not significant	ARO:3002828
sul1	2	54	0	45		0.50099	Inf	1	0.0357143	Not significant	ARO:3000410
sul2	49	7	35	10		0.284584	1.9861	1	0.0972222	Not significant	ARO:3000412
sul3	49	7	35	10		0.284584	1.9861	1	0.0972222	Not significant	ARO:3000413
sul4	49	7	35	10		0.284584	1.9861	1	0.0972222	Not significant	ARO:3004361
tcr3	5	51	4	41		1	1.00485	1	0.000397	Not significant	ARO:3002893
tet(30)	1	55	0	45		1	Inf	1	0.0178571	Not significant	ARO:3000561
tet(32)	56	0	45	0		1	0	1	0	Not significant	ARO:3000196
tet(36)	56	0	45	0		1	0	1	0	Not significant	ARO:3000197
tet(38)	1	55	0	45		1	Inf	1	0.0178571	Not significant	ARO:3000565
tet(41)	1	55	0	45		1	Inf	1	0.0178571	Not significant	ARO:3000569
tet(42)	7	49	10	35		0.284584	0.503501	1	-0.0972222	Not significant	ARO:3000572
tet(43)	5	51	0	45		0.0636492	Inf	1	0.0892857	Not significant	ARO:3000573
tet(44)	56	0	45	0		1	0	1	0	Not significant	ARO:3000556
tet(45)	0	56	1	44		0.445545	0	1	-0.0222222	Not significant	ARO:3003196
tet(62)	1	55	0	45		1	Inf	1	0.0178571	Not significant	ARO:3007492
tet(64)	1	55	0	45		1	Inf	1	0.0178571	Not significant	ARO:3007494
tet(A)	9	47	14	31		0.0956874	0.427733	1	-0.150397	Not significant	ARO:3000165
tet(H)	1	55	1	44		1	0.801788	1	-0.00436508	Not significant	ARO:3000175
tet(J)	1	55	1	44		1	0.801788	1	-0.00436508	Not significant	ARO:3000177
tet(L)	5	51	11	34		0.0531359	0.306702	1	-0.155159	Not significant	ARO:3000179
tet(M)	56	0	45	0		1	0	1	0	Not significant	ARO:3000186
tet(O)	56	0	45	0		1	0	1	0	Not significant	ARO:3000190
tet(O/32/O)	56	0	45	0		1	0	1	0	Not significant	ARO:3007119
tet(O/M/O)	56	0	45	0		1	0	1	0	Not significant	ARO:3007120
tet(O/W)	56	0	45	0		1	0	1	0	Not significant	ARO:3007121
tet(O/W/32/O)	56	0	45	0		1	0	1	0	Not significant	ARO:3007122
tet(O/W/O)	56	0	45	0		1	0	1	0	Not significant	ARO:3007123
tet(Q)	56	0	45	0		1	0	1	0	Not significant	ARO:3000191
tet(S)	56	0	45	0		1	0	1	0	Not significant	ARO:3000192
tet(T)	56	0	45	0		1	0	1	0	Not significant	ARO:3000193
tet(W)	56	0	45	0		1	0	1	0	Not significant	ARO:3000194
tet(W/32/O)	56	0	45	0		1	0	1	0	Not significant	ARO:3007124
tet(W/N/W)	56	0	45	0		1	0	1	0	Not significant	ARO:3004442
tet(Z)	1	55	0	45		1	Inf	1	0.0178571	Not significant	ARO:3000183
tetA(46)	56	0	45	0		1	0	1	0	Not significant	ARO:3004032
tetA(58)	56	0	45	0		1	0	1	0	Not significant	ARO:3003980
tetA(60)	56	0	45	0		1	0	1	0	Not significant	ARO:3004035
tetB(46)	56	0	45	0		1	0	1	0	Not significant	ARO:3004033
tetB(60)	56	0	45	0		1	0	1	0	Not significant	ARO:3004036
tetB(P)	56	0	45	0		1	0	1	0	Not significant	ARO:3000195
tlrC	55	1	44	1		1	1.24721	1	0.00436508	Not significant	ARO:3002827
tva(A)	56	0	45	0		1	0	1	0	Not significant	ARO:3004730
ugd	2	54	5	40		0.236983	0.299815	1	-0.0753968	Not significant	ARO:3003577
vanA	47	9	41	4		0.375333	0.512764	1	-0.0718254	Not significant	ARO:3000010
vanB	6	50	4	41		1	1.22751	1	0.018254	Not significant	ARO:3000013
vanC	56	0	45	0		1	0	1	0	Not significant	ARO:3000368
vanD	55	1	45	0		1	0	1	-0.0178571	Not significant	ARO:3000005
vanE	56	0	45	0		1	0	1	0	Not significant	ARO:3002907
vanF	47	9	42	3		0.217489	0.376401	1	-0.0940476	Not significant	ARO:3002908
vanG	56	0	45	0		1	0	1	0	Not significant	ARO:3002909
vanH_in_vanA_cl	1	55	0	45		1	Inf	1	0.0178571	Not significant	ARO:3002942
vanH_in_vanB_cl	1	55	0	45		1	Inf	1	0.0178571	Not significant	ARO:3002943
vanH_in_vanF_cl	1	55	3	42		0.321075	0.257842	1	-0.0488095	Not significant	ARO:3002945
vanH_in_vanM_cl	1	55	3	42		0.321075	0.257842	1	-0.0488095	Not significant	ARO:3002947
vanH_in_vanP_cl	1	55	0	45		1	Inf	1	0.0178571	Not significant	ARO:3007188
vanI	56	0	45	0		1	0	1	0	Not significant	ARO:3003723
vanL	56	0	45	0		1	0	1	0	Not significant	ARO:3002910
vanM	48	8	42	3		0.337261	0.43196	1	-0.0761905	Not significant	ARO:3002911
vanN	56	0	45	0		1	0	1	0	Not significant	ARO:3002912
vanO	56	0	45	0		1	0	1	0	Not significant	ARO:3002913
vanP	56	0	45	0		1	0	1	0	Not significant	ARO:3007189
vanR_in_vanA_cl	56	0	45	0		1	0	1	0	Not significant	ARO:3002919
vanR_in_vanB_cl	56	0	45	0		1	0	1	0	Not significant	ARO:3002921
vanR_in_vanC_cl	56	0	45	0		1	0	1	0	Not significant	ARO:3002922
vanR_in_vanD_cl	56	0	45	0		1	0	1	0	Not significant	ARO:3002923
vanR_in_vanE_cl	56	0	45	0		1	0	1	0	Not significant	ARO:3002924
vanR_in_vanF_cl	56	0	45	0		1	0	1	0	Not significant	ARO:3002925
vanR_in_vanG_cl	56	0	45	0		1	0	1	0	Not significant	ARO:3002926
vanR_in_vanI_cl	56	0	45	0		1	0	1	0	Not significant	ARO:3003728
vanR_in_vanL_cl	56	0	45	0		1	0	1	0	Not significant	ARO:3002927
vanR_in_vanM_cl	56	0	45	0		1	0	1	0	Not significant	ARO:3002928
vanR_in_vanN_cl	56	0	45	0		1	0	1	0	Not significant	ARO:3002929
vanR_in_vanO_cl	56	0	45	0		1	0	1	0	Not significant	ARO:3002930
vanR_in_vanP_cl	56	0	45	0		1	0	1	0	Not significant	ARO:3007191
vanS_in_vanA_cl	56	0	45	0		1	0	1	0	Not significant	ARO:3002931
vanS_in_vanB_cl	45	11	28	17		0.0480787	2.46068	0.978707	0.181349	Enriched in Resistant	ARO:3002932
vanS_in_vanC_cl	1	55	1	44		1	0.801788	1	-0.00436508	Not significant	ARO:3002933
vanS_in_vanD_cl	0	56	1	44		0.445545	0	1	-0.0222222	Not significant	ARO:3002934
vanS_in_vanE_cl	27	29	21	24		1	1.06337	1	0.0154762	Not significant	ARO:3002935
vanS_in_vanF_cl	12	44	19	26		0.0307327	0.377027	0.978707	-0.207937	Enriched in Sensitive	ARO:3002936
vanS_in_vanG_cl	3	53	3	42		1	0.7943	1	-0.0130952	Not significant	ARO:3002937
vanS_in_vanL_cl	20	36	22	23		0.22447	0.58398	1	-0.131746	Not significant	ARO:3002938
vanS_in_vanM_cl	47	9	43	2		0.105575	0.245858	1	-0.11627	Not significant	ARO:3002939
vanS_in_vanN_cl	0	56	1	44		0.445545	0	1	-0.0222222	Not significant	ARO:3002940
vanS_in_vanP_cl	21	35	14	31		0.534702	1.32484	1	0.0638889	Not significant	ARO:3007192
vanT_in_vanC_cl	3	53	3	42		1	0.7943	1	-0.0130952	Not significant	ARO:3002970
vanT_in_vanE_cl	8	48	3	42		0.337261	2.31503	1	0.0761905	Not significant	ARO:3002971
vanT_in_vanG_cl	55	1	44	1		1	1.24721	1	0.00436508	Not significant	ARO:3002972
vanT_in_vanN_cl	16	40	16	29		0.521202	0.727346	1	-0.0698413	Not significant	ARO:3002975
vanTm_in_vanL	11	45	9	36		1	0.977989	1	-0.00357143	Not significant	ARO:3002973
vanTr_in_vanL	9	47	2	43		0.105575	4.06739	1	0.11627	Not significant	ARO:3002974
vanU_in_vanG_cl	3	53	2	43		1	1.21464	1	0.00912698	Not significant	ARO:3004253
vanXY_in_vanC	16	40	11	34		0.659438	1.23378	1	0.0412698	Not significant	ARO:3002966
vanXY_in_vanE	56	0	45	0		1	0	1	0	Not significant	ARO:3002967
vanXY_in_vanG	3	53	0	45		0.251485	Inf	1	0.0535714	Not significant	ARO:3003069
vanXY_in_vanL	16	40	11	34		0.659438	1.23378	1	0.0412698	Not significant	ARO:3002968
vanXY_in_vanN	2	54	1	44		1	1.62208	1	0.0134921	Not significant	ARO:3002969
vanY_in_vanA_cl	20	36	15	30		0.83614	1.10995	1	0.0238095	Not significant	ARO:3002955
vanY_in_vanB_cl	15	41	11	34		0.822795	1.12945	1	0.0234127	Not significant	ARO:3002956
vanY_in_vanF_cl	16	40	11	34		0.659438	1.23378	1	0.0412698	Not significant	ARO:3002958
vanY_in_vanG_cl	0	56	1	44		0.445545	0	1	-0.0222222	Not significant	ARO:3002959
vanY_in_vanM_cl	20	36	15	30		0.83614	1.10995	1	0.0238095	Not significant	ARO:3002961
vanZ_in_vanA_cl	2	54	2	43		1	0.798113	1	-0.00873016	Not significant	ARO:3002962
vanZ_in_vanF_cl	5	51	1	44		0.221664	4.26175	1	0.0670635	Not significant	ARO:3002963
vatA	1	55	0	45		1	Inf	1	0.0178571	Not significant	ARO:3002840
vatB	33	23	32	13		0.218266	0.586014	1	-0.121825	Not significant	ARO:3002841
vatC	5	51	1	44		0.221664	4.26175	1	0.0670635	Not significant	ARO:3002842
vatE	2	54	0	45		0.50099	Inf	1	0.0357143	Not significant	ARO:3002844
vatF	2	54	5	40		0.236983	0.299815	1	-0.0753968	Not significant	ARO:3003744
vatH	25	31	27	18		0.161546	0.540989	1	-0.153571	Not significant	ARO:3002845
vgaA	56	0	45	0		1	0	1	0	Not significant	ARO:3002829
vgaALC	56	0	45	0		1	0	1	0	Not significant	ARO:3002830
vgaB	56	0	45	0		1	0	1	0	Not significant	ARO:3000118
vgaC	56	0	45	0		1	0	1	0	Not significant	ARO:3002831
vgaD	56	0	45	0		1	0	1	0	Not significant	ARO:3002832
vgaE	56	0	45	0		1	0	1	0	Not significant	ARO:3002833
vmlR	56	0	45	0		1	0	1	0	Not significant	ARO:3004476

## Sheet: Chemoresistance_gene
CRG_ID	resistant_present	resistant_absent	sensitive_present	sensitive_absent	fisher_test	p_value	odds_ratio	FDR
AEJJGP_00470	2	54	4	41		0.402714	0.383263	0.772276
AEJJGP_01235	2	54	3	42		0.653538	0.521931	0.905955
AEJJGP_01725	0	56	1	44		0.445545	0	0.778506
AEJJGP_01745	2	54	4	41		0.402714	0.383263	0.772276
AEJJGP_02460	0	56	1	44		0.445545	0	0.778506
AEJJGP_02600	3	53	6	39		0.182022	0.371588	0.687576
AEJJGP_03120	3	53	7	38		0.105099	0.310873	0.633448
AEJJGP_03135	3	53	5	40		0.461009	0.456415	0.778506
AEJJGP_03140	3	53	7	38		0.105099	0.310873	0.633448
AEJJGP_03305	2	54	3	42		0.653538	0.521931	0.905955
AEJJGP_04000	2	54	4	41		0.402714	0.383263	0.772276
AEJJGP_04915	2	54	4	41		0.402714	0.383263	0.772276
AEJJGP_04945	2	54	4	41		0.402714	0.383263	0.772276
AEJJGP_05585	2	54	4	41		0.402714	0.383263	0.772276
AEJJGP_06255	2	54	4	41		0.402714	0.383263	0.772276
AEJJGP_06680	3	53	3	42		1	0.7943	1
AEJJGP_06900	9	47	6	39		0.783341	1.24201	0.993189
AEJJGP_07320	2	54	4	41		0.402714	0.383263	0.772276
AEJJGP_08540	11	45	10	35		0.808048	0.856887	1
AEJJGP_09410	2	54	4	41		0.402714	0.383263	0.772276
AGHOLM_00365	3	53	9	36		0.0313187	0.229735	0.633448
AGHOLM_00470	3	53	9	36		0.0313187	0.229735	0.633448
AGHOLM_01550	4	52	3	42		1	1.07616	1
AGHOLM_02095	1	55	1	44		1	0.801788	1
AGHOLM_02190	7	49	10	35		0.284584	0.503501	0.745426
AGHOLM_02775	6	50	10	35		0.16993	0.423692	0.676725
AGHOLM_03740	7	49	8	37		0.575941	0.663478	0.871834
AGHOLM_03775	7	49	10	35		0.284584	0.503501	0.745426
AGHOLM_03785	5	51	9	36		0.148997	0.395864	0.676725
AGHOLM_03900	7	49	10	35		0.284584	0.503501	0.745426
AGHOLM_03945	4	52	9	36		0.0742139	0.311333	0.633448
AGHOLM_04275	2	54	3	42		0.653538	0.521931	0.905955
AGHOLM_06120	7	49	10	35		0.284584	0.503501	0.745426
AGHOLM_07225	3	53	3	42		1	0.7943	1
AGHOLM_07555	4	52	8	37		0.127306	0.35946	0.676725
AGHOLM_07710	3	53	7	38		0.105099	0.310873	0.633448
AGHOLM_08535	4	52	10	35		0.0418207	0.27278	0.633448
AGHOLM_08900	2	54	5	40		0.236983	0.299815	0.745426
AGHOLM_09070	3	53	9	36		0.0313187	0.229735	0.633448
AILIHG_00030	32	24	22	23		0.429397	1.38931	0.778506
AILIHG_00400	1	55	1	44		1	0.801788	1
AILIHG_00600	1	55	1	44		1	0.801788	1
AILIHG_00730	14	42	13	32		0.821377	0.822136	1
AILIHG_01125	11	45	14	31		0.246655	0.544628	0.745426
AILIHG_01475	18	38	17	28		0.674465	0.782126	0.925908
AILIHG_01865	1	55	2	43		0.584158	0.394511	0.871834
AILIHG_02530	5	51	8	37		0.237018	0.457044	0.745426
AILIHG_02700	2	54	1	44		1	1.62208	1
AILIHG_04085	1	55	5	40		0.0860322	0.147934	0.633448
AILIHG_04695	25	31	22	23		0.692872	0.844541	0.925908
AILIHG_04875	0	56	1	44		0.445545	0	0.778506
AILIHG_04880	9	47	14	31		0.0956874	0.427733	0.633448
AILIHG_04975	21	35	21	24		0.418371	0.688321	0.778506
AILIHG_05230	4	52	8	37		0.127306	0.35946	0.676725
AILIHG_06440	1	55	8	37		0.00983236	0.0858834	0.633448
AILIHG_06520	7	49	14	31		0.0275021	0.320079	0.633448
AILIHG_06615	11	45	14	31		0.246655	0.544628	0.745426
AILIHG_09460	9	47	13	32		0.148656	0.474963	0.676725
AILIHG_10195	23	33	20	25		0.840014	0.872407	1
AJLBDP_01010	7	49	0	45		0.0161223	Inf	0.633448
AJLBDP_01465	4	52	0	45		0.12645	Inf	0.676725
AJLBDP_01475	3	53	0	45		0.251485	Inf	0.745426
AJLBDP_01525	7	49	0	45		0.0161223	Inf	0.633448
AJLBDP_02700	3	53	0	45		0.251485	Inf	0.745426
AJLBDP_03330	8	48	2	43		0.178295	3.54374	0.676725
AJLBDP_03335	8	48	2	43		0.178295	3.54374	0.676725
AJLBDP_03720	8	48	2	43		0.178295	3.54374	0.676725
AJLBDP_03970	7	49	0	45		0.0161223	Inf	0.633448
AJLBDP_04670	8	48	2	43		0.178295	3.54374	0.676725
AJLBDP_04870	8	48	2	43		0.178295	3.54374	0.676725
AJLBDP_05560	8	48	2	43		0.178295	3.54374	0.676725
AJLBDP_06150	8	48	2	43		0.178295	3.54374	0.676725
AJLBDP_07535	7	49	0	45		0.0161223	Inf	0.633448
AJLBDP_07540	8	48	2	43		0.178295	3.54374	0.676725
AJLBDP_08380	32	24	22	23		0.429397	1.38931	0.778506
AJLBDP_08445	7	49	0	45		0.0161223	Inf	0.633448
AJLBDP_09205	8	48	2	43		0.178295	3.54374	0.676725
AJLBDP_09510	8	48	2	43		0.178295	3.54374	0.676725
AJPFNB_00005	1	55	2	43		0.584158	0.394511	0.871834
AJPFNB_01720	3	53	4	41		0.696979	0.583368	0.926187
AJPFNB_02650	7	49	10	35		0.284584	0.503501	0.745426
AJPFNB_03250	7	49	10	35		0.284584	0.503501	0.745426
AJPFNB_05620	3	53	9	36		0.0313187	0.229735	0.633448
AJPFNB_05750	3	53	9	36		0.0313187	0.229735	0.633448
AJPFNB_06480	4	52	10	35		0.0418207	0.27278	0.633448
AJPFNB_06715	7	49	10	35		0.284584	0.503501	0.745426
AJPFNB_07085	3	53	4	41		0.696979	0.583368	0.926187
AJPFNB_07805	4	52	9	36		0.0742139	0.311333	0.633448
AJPFNB_08250	4	52	9	36		0.0742139	0.311333	0.633448
AJPFNB_08680	0	56	1	44		0.445545	0	0.778506
AJPFNB_09155	4	52	9	36		0.0742139	0.311333	0.633448
AJPFNB_09435	2	54	3	42		0.653538	0.521931	0.905955
AJPFNB_10050	4	52	9	36		0.0742139	0.311333	0.633448
AJPFNB_10105	7	49	5	40		1	1.14136	1
AJPFNB_10210	4	52	9	36		0.0742139	0.311333	0.633448
AJPFNB_10215	7	49	9	36		0.412201	0.574668	0.774833
AJPFNB_10255	7	49	8	37		0.575941	0.663478	0.871834
AKAPBI_00695	0	56	1	44		0.445545	0	0.778506
AKAPBI_01005	0	56	1	44		0.445545	0	0.778506
AKAPBI_01070	0	56	1	44		0.445545	0	0.778506
AKAPBI_01260	4	52	1	44		0.377652	3.34922	0.772276
AKAPBI_01265	4	52	1	44		0.377652	3.34922	0.772276
AKAPBI_03635	0	56	1	44		0.445545	0	0.778506
AKAPBI_03650	11	45	4	41		0.164998	2.4841	0.676725
AKAPBI_03655	9	47	4	41		0.375333	1.95022	0.772276
AKAPBI_04075	0	56	1	44		0.445545	0	0.778506
AKAPBI_05295	6	50	6	39		0.762303	0.781944	0.971691
AKAPBI_05435	12	44	4	41		0.10516	2.76882	0.633448
AKAPBI_08295	0	56	1	44		0.445545	0	0.778506
AKAPBI_08675	3	53	1	44		0.626591	2.47015	0.885125
AKAPBI_09320	3	53	1	44		0.626591	2.47015	0.885125
AKAPBI_09940	0	56	1	44		0.445545	0	0.778506
AKAPBI_09965	2	54	1	44		1	1.62208	1
AKAPBI_10180	1	55	1	44		1	0.801788	1
AMINDN_00955	8	48	2	43		0.178295	3.54374	0.676725
AMINDN_01070	8	48	2	43		0.178295	3.54374	0.676725
AMINDN_01745	8	48	2	43		0.178295	3.54374	0.676725
AMINDN_02760	1	55	0	45		1	Inf	1
AMINDN_02800	1	55	0	45		1	Inf	1
AMINDN_02850	8	48	2	43		0.178295	3.54374	0.676725
AMINDN_03085	8	48	2	43		0.178295	3.54374	0.676725
AMINDN_03520	7	49	0	45		0.0161223	Inf	0.633448
AMINDN_03965	8	48	2	43		0.178295	3.54374	0.676725
AMINDN_05210	8	48	2	43		0.178295	3.54374	0.676725
AMINDN_05215	8	48	2	43		0.178295	3.54374	0.676725
AMINDN_05495	8	48	2	43		0.178295	3.54374	0.676725
AMINDN_05500	8	48	2	43		0.178295	3.54374	0.676725
AMINDN_06695	8	48	2	43		0.178295	3.54374	0.676725
AMINDN_08130	2	54	0	45		0.50099	Inf	0.801457
AMINDN_08230	7	49	0	45		0.0161223	Inf	0.633448
AMINDN_09850	13	43	4	41		0.0655186	3.06649	0.633448
AMINDN_10095	8	48	2	43		0.178295	3.54374	0.676725
BAOEDD_00170	4	52	10	35		0.0418207	0.27278	0.633448
BAOEDD_00395	7	49	10	35		0.284584	0.503501	0.745426
BAOEDD_01650	4	52	8	37		0.127306	0.35946	0.676725
BAOEDD_02105	3	53	7	38		0.105099	0.310873	0.633448
BAOEDD_03930	3	53	8	37		0.0583858	0.265261	0.633448
BAOEDD_04885	4	52	9	36		0.0742139	0.311333	0.633448
BAOEDD_04935	7	49	10	35		0.284584	0.503501	0.745426
BAOEDD_05070	7	49	10	35		0.284584	0.503501	0.745426
BAOEDD_05080	4	52	9	36		0.0742139	0.311333	0.633448
BAOEDD_05120	1	55	0	45		1	Inf	1
BAOEDD_05575	3	53	3	42		1	0.7943	1
BAOEDD_06380	3	53	4	41		0.696979	0.583368	0.926187
BAOEDD_06855	7	49	10	35		0.284584	0.503501	0.745426
BAOEDD_07435	7	49	10	35		0.284584	0.503501	0.745426
BAOEDD_07710	3	53	7	38		0.105099	0.310873	0.633448
BAOEDD_07735	1	55	0	45		1	Inf	1
BAOEDD_08975	3	53	9	36		0.0313187	0.229735	0.633448
BAOEDD_09090	4	52	1	44		0.377652	3.34922	0.772276
BCJHIH_00770	2	54	2	43		1	0.798113	1
BCJHIH_01040	14	42	3	42		0.0165634	4.60298	0.633448
BCJHIH_03505	8	48	2	43		0.178295	3.54374	0.676725
BCJHIH_04845	8	48	2	43		0.178295	3.54374	0.676725
BCJHIH_04850	2	54	2	43		1	0.798113	1
BCJHIH_05100	8	48	2	43		0.178295	3.54374	0.676725
BCJHIH_05105	8	48	2	43		0.178295	3.54374	0.676725
BCJHIH_06275	8	48	2	43		0.178295	3.54374	0.676725
BCJHIH_06950	8	48	2	43		0.178295	3.54374	0.676725
BCJHIH_07205	5	51	2	43		0.456849	2.09322	0.778506
BCJHIH_07265	1	55	2	43		0.584158	0.394511	0.871834
BCJHIH_07280	1	55	2	43		0.584158	0.394511	0.871834
BCJHIH_08480	8	48	2	43		0.178295	3.54374	0.676725
BCJHIH_09275	8	48	2	43		0.178295	3.54374	0.676725
BCJHIH_09395	8	48	2	43		0.178295	3.54374	0.676725
BCOPPB_00400	6	50	2	43		0.293429	2.55771	0.745426
BCOPPB_01665	8	48	9	36		0.593689	0.669396	0.879979
BCOPPB_01825	7	49	4	41		0.750418	1.45888	0.963259
BCOPPB_04210	0	56	1	44		0.445545	0	0.778506
BCOPPB_04875	5	51	2	43		0.456849	2.09322	0.778506
BCOPPB_05070	5	51	4	41		1	1.00485	1
BCOPPB_06090	7	49	4	41		0.750418	1.45888	0.963259
BCOPPB_06280	23	33	21	24		0.686868	0.798347	0.925908
BCOPPB_07270	0	56	1	44		0.445545	0	0.778506
BCOPPB_07520	13	43	16	29		0.191076	0.551297	0.698336
BCOPPB_07675	0	56	1	44		0.445545	0	0.778506
BCOPPB_07680	0	56	1	44		0.445545	0	0.778506
BCOPPB_08930	5	51	2	43		0.456849	2.09322	0.778506
BCOPPB_09385	0	56	1	44		0.445545	0	0.778506
BCOPPB_09460	4	52	3	42		1	1.07616	1
BCOPPB_09590	3	53	2	43		1	1.21464	1
BCPBGJ_00110	3	53	10	35		0.0162683	0.201278	0.633448
BCPBGJ_00840	5	51	13	32		0.0168102	0.244842	0.633448
BCPBGJ_01360	11	45	13	32		0.348593	0.604811	0.75987
BCPBGJ_01425	1	55	5	40		0.0860322	0.147934	0.633448
BCPBGJ_01955	22	34	19	26		0.839507	0.88652	1
BCPBGJ_02180	8	48	10	35		0.311425	0.586521	0.745426
BCPBGJ_02185	10	46	14	31		0.158914	0.484946	0.676725
BCPBGJ_02500	10	46	14	31		0.158914	0.484946	0.676725
BCPBGJ_02770	0	56	4	41		0.0364922	0	0.633448
BCPBGJ_03525	11	45	14	31		0.246655	0.544628	0.745426
BCPBGJ_03820	11	45	15	30		0.169098	0.492449	0.676725
BCPBGJ_03910	10	46	10	35		0.62247	0.762958	0.885125
BCPBGJ_04410	29	27	19	26		0.423356	1.46413	0.778506
BCPBGJ_04445	8	48	8	37		0.785021	0.772847	0.993189
BCPBGJ_05275	0	56	3	42		0.0851485	0	0.633448
BCPBGJ_06120	5	51	10	35		0.0904307	0.346852	0.633448
BCPBGJ_08330	4	52	9	36		0.0742139	0.311333	0.633448
BCPBGJ_08610	8	48	11	34		0.21137	0.518604	0.744023
BCPBGJ_09210	7	49	6	39		1	0.929255	1
BCPBGJ_09260	5	51	4	41		1	1.00485	1
BDCJPF_00685	2	54	0	45		0.50099	Inf	0.801457
BDCJPF_00965	10	46	14	31		0.158914	0.484946	0.676725
BDCJPF_02045	11	45	14	31		0.246655	0.544628	0.745426
BDCJPF_02160	12	44	15	30		0.257912	0.548796	0.745426
BDCJPF_02590	32	24	20	25		0.233402	1.6582	0.745426
BDCJPF_02735	7	49	6	39		1	0.929255	1
BDCJPF_04170	4	52	10	35		0.0418207	0.27278	0.633448
BDCJPF_04320	25	31	22	23		0.692872	0.844541	0.925908
BDCJPF_04540	1	55	4	41		0.168988	0.189235	0.676725
BDCJPF_04545	12	44	14	31		0.360183	0.606988	0.772276
BDCJPF_04675	25	31	22	23		0.692872	0.844541	0.925908
BDCJPF_05040	2	54	0	45		0.50099	Inf	0.801457
BDCJPF_05330	13	43	14	31		0.49789	0.672151	0.801457
BDCJPF_05880	2	54	0	45		0.50099	Inf	0.801457
BDCJPF_07220	10	46	13	32		0.235126	0.538499	0.745426
BDCJPF_07415	8	48	3	42		0.337261	2.31503	0.745426
BDCJPF_07865	2	54	0	45		0.50099	Inf	0.801457
BDCJPF_08030	11	45	14	31		0.246655	0.544628	0.745426
BDCJPF_08315	2	54	0	45		0.50099	Inf	0.801457
BDCJPF_08555	11	45	14	31		0.246655	0.544628	0.745426
BDCJPF_08865	9	47	6	39		0.783341	1.24201	0.993189
BDCJPF_09070	5	51	3	42		0.729215	1.36833	0.946784
BDHDFG_00130	6	50	3	42		0.727468	1.67168	0.946784
BDHDFG_02795	5	51	2	43		0.456849	2.09322	0.778506
BDHDFG_02970	10	46	14	31		0.158914	0.484946	0.676725
BDHDFG_03515	7	49	4	41		0.750418	1.45888	0.963259
BDHDFG_03855	17	39	17	28		0.526115	0.720344	0.827848
BDHDFG_04215	9	47	8	37		1	0.88671	1
BDHDFG_04595	16	40	16	29		0.521202	0.727346	0.82175
BDHDFG_04840	0	56	2	43		0.19604	0	0.698336
BDHDFG_06565	22	34	20	25		0.685878	0.810537	0.925908
BDHDFG_06570	9	47	13	32		0.148656	0.474963	0.676725
BDHDFG_06925	19	37	17	28		0.834651	0.8472	1
BDHDFG_08425	9	47	9	36		0.613226	0.768008	0.885125
BDHDFG_08525	6	50	8	37		0.388852	0.558307	0.772276
BDHDFG_08620	11	45	15	30		0.169098	0.492449	0.676725
BEPOIK_00505	2	54	4	41		0.402714	0.383263	0.772276
BEPOIK_00955	3	53	5	40		0.461009	0.456415	0.778506
BEPOIK_01725	2	54	4	41		0.402714	0.383263	0.772276
BEPOIK_02525	2	54	4	41		0.402714	0.383263	0.772276
BEPOIK_02560	2	54	4	41		0.402714	0.383263	0.772276
BEPOIK_03465	5	51	4	41		1	1.00485	1
BEPOIK_04295	2	54	4	41		0.402714	0.383263	0.772276
BEPOIK_04955	2	54	4	41		0.402714	0.383263	0.772276
BEPOIK_05615	2	54	3	42		0.653538	0.521931	0.905955
BEPOIK_05795	3	53	7	38		0.105099	0.310873	0.633448
BEPOIK_05800	3	53	5	40		0.461009	0.456415	0.778506
BEPOIK_05815	3	53	7	38		0.105099	0.310873	0.633448
BEPOIK_06670	11	45	10	35		0.808048	0.856887	1
BEPOIK_07400	2	54	4	41		0.402714	0.383263	0.772276
BEPOIK_08385	2	54	4	41		0.402714	0.383263	0.772276
BEPOIK_08925	2	54	4	41		0.402714	0.383263	0.772276
BEPOIK_08945	2	54	0	45		0.50099	Inf	0.801457
BEPOIK_09685	3	53	7	38		0.105099	0.310873	0.633448
BFELMI_00960	8	48	2	43		0.178295	3.54374	0.676725
BFELMI_01080	8	48	2	43		0.178295	3.54374	0.676725
BFELMI_01760	8	48	2	43		0.178295	3.54374	0.676725
BFELMI_02550	1	55	0	45		1	Inf	1
BFELMI_02570	1	55	0	45		1	Inf	1
BFELMI_02620	7	49	0	45		0.0161223	Inf	0.633448
BFELMI_03030	8	48	2	43		0.178295	3.54374	0.676725
BFELMI_03740	7	49	0	45		0.0161223	Inf	0.633448
BFELMI_03770	2	54	0	45		0.50099	Inf	0.801457
BFELMI_04160	8	48	2	43		0.178295	3.54374	0.676725
BFELMI_05305	8	48	2	43		0.178295	3.54374	0.676725
BFELMI_05310	7	49	0	45		0.0161223	Inf	0.633448
BFELMI_05465	32	24	22	23		0.429397	1.38931	0.778506
BFELMI_05705	8	48	2	43		0.178295	3.54374	0.676725
BFELMI_05710	8	48	2	43		0.178295	3.54374	0.676725
BFELMI_06890	8	48	2	43		0.178295	3.54374	0.676725
BFELMI_08225	2	54	0	45		0.50099	Inf	0.801457
BFELMI_08340	7	49	0	45		0.0161223	Inf	0.633448
BFELMI_09740	6	50	0	45		0.0320463	Inf	0.633448
BFELMI_09995	7	49	0	45		0.0161223	Inf	0.633448
BJDNIP_00985	3	53	1	44		0.626591	2.47015	0.885125
BJDNIP_01835	5	51	3	42		0.729215	1.36833	0.946784
BJDNIP_02340	0	56	1	44		0.445545	0	0.778506
BJDNIP_02765	4	52	3	42		1	1.07616	1
BJDNIP_03685	7	49	8	37		0.575941	0.663478	0.871834
BJDNIP_03705	3	53	1	44		0.626591	2.47015	0.885125
BJDNIP_03715	5	51	7	38		0.362904	0.535583	0.772276
BJDNIP_03825	4	52	6	39		0.334006	0.503476	0.745426
BJDNIP_03875	3	53	1	44		0.626591	2.47015	0.885125
BJDNIP_04520	3	53	1	44		0.626591	2.47015	0.885125
BJDNIP_05300	3	53	1	44		0.626591	2.47015	0.885125
BJDNIP_06215	3	53	1	44		0.626591	2.47015	0.885125
BJDNIP_07575	3	53	1	44		0.626591	2.47015	0.885125
BJDNIP_07835	3	53	1	44		0.626591	2.47015	0.885125
BJDNIP_08030	4	52	10	35		0.0418207	0.27278	0.633448
BJDNIP_08760	4	52	1	44		0.377652	3.34922	0.772276
BJDNIP_08855	4	52	1	44		0.377652	3.34922	0.772276
BLBGDH_00160	0	56	3	42		0.0851485	0	0.633448
BLBGDH_03695	4	52	9	36		0.0742139	0.311333	0.633448
BLBGDH_04050	9	47	11	34		0.324177	0.595025	0.745426
BLBGDH_04760	1	55	1	44		1	0.801788	1
BLBGDH_04810	1	55	3	42		0.321075	0.257842	0.745426
BLBGDH_04815	5	51	4	41		1	1.00485	1
BLBGDH_05920	3	53	10	35		0.0162683	0.201278	0.633448
BLBGDH_06795	4	52	13	32		0.00626207	0.19255	0.633448
BLBGDH_07405	0	56	1	44		0.445545	0	0.778506
BLBGDH_07505	1	55	5	40		0.0860322	0.147934	0.633448
BLBGDH_08150	22	34	19	26		0.839507	0.88652	1
BLBGDH_08195	11	45	11	34		0.631304	0.757683	0.890724
BLBGDH_08415	8	48	10	35		0.311425	0.586521	0.745426
BLBGDH_08420	7	49	10	35		0.284584	0.503501	0.745426
BLBGDH_08790	10	46	14	31		0.158914	0.484946	0.676725
BLBGDH_09095	0	56	4	41		0.0364922	0	0.633448
BLBGDH_10040	11	45	14	31		0.246655	0.544628	0.745426
BLBGDH_10390	6	50	10	35		0.16993	0.423692	0.676725
BLBGDH_10500	11	45	14	31		0.246655	0.544628	0.745426
BLBGDH_11075	0	56	1	44		0.445545	0	0.778506
BLBGDH_11110	8	48	8	37		0.785021	0.772847	0.993189
BLHMGG_00640	1	55	0	45		1	Inf	1
BLHMGG_01065	1	55	0	45		1	Inf	1
BLHMGG_01070	1	55	0	45		1	Inf	1
BLHMGG_01485	1	55	0	45		1	Inf	1
BLHMGG_01535	1	55	0	45		1	Inf	1
BLHMGG_02220	1	55	0	45		1	Inf	1
BLHMGG_02690	1	55	0	45		1	Inf	1
BLHMGG_03410	1	55	0	45		1	Inf	1
BLHMGG_04725	1	55	0	45		1	Inf	1
BLHMGG_04730	1	55	0	45		1	Inf	1
BLHMGG_07275	1	55	0	45		1	Inf	1
BLHMGG_07335	1	55	0	45		1	Inf	1
BLHMGG_07995	1	55	0	45		1	Inf	1
BLHMGG_08795	2	54	0	45		0.50099	Inf	0.801457
BLHMGG_09130	1	55	0	45		1	Inf	1
BOCDIA_00055	1	55	0	45		1	Inf	1
BOCDIA_00395	1	55	0	45		1	Inf	1
BOCDIA_00510	9	47	5	40		0.56929	1.52559	0.871834
BOCDIA_00515	3	53	0	45		0.251485	Inf	0.745426
BOCDIA_00600	8	48	5	40		0.768535	1.32959	0.978584
BOCDIA_01080	6	50	3	42		0.727468	1.67168	0.946784
BOCDIA_01350	7	49	4	41		0.750418	1.45888	0.963259
BOCDIA_02230	4	52	3	42		1	1.07616	1
BOCDIA_03095	1	55	0	45		1	Inf	1
BOCDIA_05675	7	49	5	40		1	1.14136	1
BOCDIA_06125	7	49	6	39		1	0.929255	1
BOCDIA_06520	9	47	2	43		0.105575	4.06739	0.633448
BOCDIA_07725	7	49	5	40		1	1.14136	1
BOCDIA_08150	4	52	1	44		0.377652	3.34922	0.772276
BOCDIA_09535	4	52	3	42		1	1.07616	1
BOCDIA_09595	1	55	5	40		0.0860322	0.147934	0.633448
BOCFFO_00265	9	47	9	36		0.613226	0.768008	0.885125
BOCFFO_00820	1	55	1	44		1	0.801788	1
BOCFFO_02545	11	45	14	31		0.246655	0.544628	0.745426
BOCFFO_02635	11	45	15	30		0.169098	0.492449	0.676725
BOCFFO_02785	2	54	4	41		0.402714	0.383263	0.772276
BOCFFO_04205	5	51	3	42		0.729215	1.36833	0.946784
BOCFFO_04290	4	52	10	35		0.0418207	0.27278	0.633448
BOCFFO_04730	18	38	17	28		0.674465	0.782126	0.925908
BOCFFO_05255	9	47	11	34		0.324177	0.595025	0.745426
BOCFFO_06945	0	56	4	41		0.0364922	0	0.633448
BOCFFO_07030	10	46	14	31		0.158914	0.484946	0.676725
BOCFFO_07035	25	31	22	23		0.692872	0.844541	0.925908
BOCFFO_07620	23	33	21	24		0.686868	0.798347	0.925908
BOCFFO_07875	10	46	13	32		0.235126	0.538499	0.745426
BOCFFO_09155	4	52	7	38		0.210441	0.421243	0.744023
CHFDFJ_00045	10	46	14	31		0.158914	0.484946	0.676725
CHFDFJ_00325	2	54	0	45		0.50099	Inf	0.801457
CHFDFJ_02285	7	49	6	39		1	0.929255	1
CHFDFJ_02430	32	24	22	23		0.429397	1.38931	0.778506
CHFDFJ_02860	12	44	15	30		0.257912	0.548796	0.745426
CHFDFJ_02975	11	45	15	30		0.169098	0.492449	0.676725
CHFDFJ_03740	4	52	10	35		0.0418207	0.27278	0.633448
CHFDFJ_04430	25	31	22	23		0.692872	0.844541	0.925908
CHFDFJ_04560	12	44	14	31		0.360183	0.606988	0.772276
CHFDFJ_04565	1	55	4	41		0.168988	0.189235	0.676725
CHFDFJ_04785	25	31	22	23		0.692872	0.844541	0.925908
CHFDFJ_05040	2	54	0	45		0.50099	Inf	0.801457
CHFDFJ_05330	13	43	15	30		0.273419	0.607739	0.745426
CHFDFJ_05880	2	54	0	45		0.50099	Inf	0.801457
CHFDFJ_06895	8	48	3	42		0.337261	2.31503	0.745426
CHFDFJ_07175	11	45	14	31		0.246655	0.544628	0.745426
CHFDFJ_07510	10	46	13	32		0.235126	0.538499	0.745426
CHFDFJ_07660	2	54	0	45		0.50099	Inf	0.801457
CHFDFJ_07900	11	45	14	31		0.246655	0.544628	0.745426
CHFDFJ_08210	9	47	6	39		0.783341	1.24201	0.993189
CHFDFJ_08295	5	51	3	42		0.729215	1.36833	0.946784
CHFDFJ_09520	2	54	0	45		0.50099	Inf	0.801457
CIAFCG_00755	7	49	5	40		1	1.14136	1
CIAFCG_01630	9	47	5	40		0.56929	1.52559	0.871834
CIAFCG_01740	25	31	22	23		0.692872	0.844541	0.925908
CIAFCG_01745	1	55	2	43		0.584158	0.394511	0.871834
CIAFCG_01790	3	53	2	43		1	1.21464	1
CIAFCG_02000	6	50	4	41		1	1.22751	1
CIAFCG_02280	7	49	5	40		1	1.14136	1
CIAFCG_02885	6	50	5	40		1	0.960368	1
CIAFCG_03015	7	49	5	40		1	1.14136	1
CIAFCG_03835	23	33	20	25		0.840014	0.872407	1
CIAFCG_05095	7	49	5	40		1	1.14136	1
CIAFCG_06165	4	52	2	43		0.689628	1.64593	0.925908
CIAFCG_06405	32	24	22	23		0.429397	1.38931	0.778506
CIAFCG_07025	2	54	2	43		1	0.798113	1
CIAFCG_07860	3	53	2	43		1	1.21464	1
CIAFCG_08835	3	53	2	43		1	1.21464	1
CICHAD_00125	25	31	22	23		0.692872	0.844541	0.925908
CICHAD_00950	7	49	5	40		1	1.14136	1
CICHAD_02710	12	44	9	36		1	1.08995	1
CICHAD_02835	1	55	2	43		0.584158	0.394511	0.871834
CICHAD_02840	11	45	7	38		0.794311	1.32331	1
CICHAD_02945	9	47	5	40		0.56929	1.52559	0.871834
CICHAD_03915	7	49	5	40		1	1.14136	1
CICHAD_04775	32	24	22	23		0.429397	1.38931	0.778506
CICHAD_05585	0	56	1	44		0.445545	0	0.778506
CICHAD_05785	3	53	2	43		1	1.21464	1
CICHAD_06010	8	48	7	38		1	0.905663	1
CICHAD_06885	7	49	5	40		1	1.14136	1
CICHAD_07170	3	53	2	43		1	1.21464	1
CICHAD_07370	2	54	2	43		1	0.798113	1
CICHAD_07530	4	52	4	41		1	0.79034	1
CMAINI_00215	10	46	14	31		0.158914	0.484946	0.676725
CMAINI_00220	1	55	1	44		1	0.801788	1
CMAINI_00395	18	38	16	29		0.832707	0.859857	1
CMAINI_01035	11	45	13	32		0.348593	0.604811	0.75987
CMAINI_01515	1	55	0	45		1	Inf	1
CMAINI_02190	11	45	10	35		0.808048	0.856887	1
CMAINI_02475	4	52	9	36		0.0742139	0.311333	0.633448
CMAINI_02760	15	41	7	38		0.227339	1.97293	0.745426
CMAINI_03275	28	28	23	22		1	0.956918	1
CMAINI_05540	2	54	1	44		1	1.62208	1
CMAINI_05625	11	45	15	30		0.169098	0.492449	0.676725
CMAINI_06305	2	54	4	41		0.402714	0.383263	0.772276
CMAINI_07705	1	55	0	45		1	Inf	1
CMAINI_08535	24	32	21	24		0.84056	0.858458	1
CMAINI_09000	8	48	14	31		0.0534637	0.372827	0.633448
CMNBJG_00525	2	54	4	41		0.402714	0.383263	0.772276
CMNBJG_00555	2	54	4	41		0.402714	0.383263	0.772276
CMNBJG_01415	2	54	4	41		0.402714	0.383263	0.772276
CMNBJG_02440	9	47	8	37		1	0.88671	1
CMNBJG_02845	2	54	4	41		0.402714	0.383263	0.772276
CMNBJG_03645	3	53	7	38		0.105099	0.310873	0.633448
CMNBJG_03660	3	53	5	40		0.461009	0.456415	0.778506
CMNBJG_03665	3	53	7	38		0.105099	0.310873	0.633448
CMNBJG_04515	2	54	4	41		0.402714	0.383263	0.772276
CMNBJG_05010	2	54	4	41		0.402714	0.383263	0.772276
CMNBJG_05855	2	54	4	41		0.402714	0.383263	0.772276
CMNBJG_06945	11	45	10	35		0.808048	0.856887	1
CMNBJG_08225	2	54	4	41		0.402714	0.383263	0.772276
CMNBJG_09110	0	56	1	44		0.445545	0	0.778506
CMNBJG_09605	3	53	7	38		0.105099	0.310873	0.633448
CMNBJG_09740	0	56	1	44		0.445545	0	0.778506
CMNBJG_10415	2	54	4	41		0.402714	0.383263	0.772276
CMNBJG_10435	0	56	2	43		0.19604	0	0.698336
CPJEBP_00280	11	45	10	35		0.808048	0.856887	1
CPJEBP_00325	6	50	2	43		0.293429	2.55771	0.745426
CPJEBP_00515	8	48	3	42		0.337261	2.31503	0.745426
CPJEBP_00780	8	48	3	42		0.337261	2.31503	0.745426
CPJEBP_02015	8	48	3	42		0.337261	2.31503	0.745426
CPJEBP_03080	8	48	3	42		0.337261	2.31503	0.745426
CPJEBP_03110	11	45	4	41		0.164998	2.4841	0.676725
CPJEBP_03115	11	45	4	41		0.164998	2.4841	0.676725
CPJEBP_04040	5	51	3	42		0.729215	1.36833	0.946784
CPJEBP_04045	6	50	3	42		0.727468	1.67168	0.946784
CPJEBP_04225	8	48	3	42		0.337261	2.31503	0.745426
CPJEBP_04545	8	48	3	42		0.337261	2.31503	0.745426
CPJEBP_05705	8	48	3	42		0.337261	2.31503	0.745426
CPJEBP_06510	6	50	3	42		0.727468	1.67168	0.946784
CPJEBP_06515	7	49	3	42		0.505296	1.98697	0.801457
CPJEBP_06645	8	48	3	42		0.337261	2.31503	0.745426
CPJEBP_07830	3	53	3	42		1	0.7943	1
CPJEBP_09215	15	41	8	37		0.343937	1.6834	0.75877
CPJEBP_09615	1	55	0	45		1	Inf	1
CPJEBP_09925	7	49	5	40		1	1.14136	1
CPJEBP_10505	4	52	1	44		0.377652	3.34922	0.772276
DAKCMC_00135	8	48	2	43		0.178295	3.54374	0.676725
DAKCMC_01395	8	48	2	43		0.178295	3.54374	0.676725
DAKCMC_01400	8	48	2	43		0.178295	3.54374	0.676725
DAKCMC_01980	3	53	0	45		0.251485	Inf	0.745426
DAKCMC_02495	8	48	2	43		0.178295	3.54374	0.676725
DAKCMC_02630	8	48	2	43		0.178295	3.54374	0.676725
DAKCMC_02830	8	48	2	43		0.178295	3.54374	0.676725
DAKCMC_02985	1	55	0	45		1	Inf	1
DAKCMC_03065	7	49	0	45		0.0161223	Inf	0.633448
DAKCMC_04940	2	54	0	45		0.50099	Inf	0.801457
DAKCMC_05560	8	48	2	43		0.178295	3.54374	0.676725
DAKCMC_06315	7	49	0	45		0.0161223	Inf	0.633448
DAKCMC_06820	8	48	2	43		0.178295	3.54374	0.676725
DAKCMC_07445	4	52	0	45		0.12645	Inf	0.676725
DAKCMC_07460	1	55	0	45		1	Inf	1
DAKCMC_07510	8	48	2	43		0.178295	3.54374	0.676725
DAKCMC_09645	8	48	2	43		0.178295	3.54374	0.676725
DAKCMC_09650	7	49	0	45		0.0161223	Inf	0.633448
DAKCMC_09740	8	48	2	43		0.178295	3.54374	0.676725
DAKCMC_10005	7	49	0	45		0.0161223	Inf	0.633448
DCPFCH_00190	4	52	2	43		0.689628	1.64593	0.925908
DCPFCH_00345	3	53	1	44		0.626591	2.47015	0.885125
DCPFCH_01165	7	49	10	35		0.284584	0.503501	0.745426
DCPFCH_01670	5	51	3	42		0.729215	1.36833	0.946784
DCPFCH_02500	4	52	1	44		0.377652	3.34922	0.772276
DCPFCH_02650	4	52	1	44		0.377652	3.34922	0.772276
DCPFCH_03460	3	53	1	44		0.626591	2.47015	0.885125
DCPFCH_04350	3	53	1	44		0.626591	2.47015	0.885125
DCPFCH_04395	6	50	6	39		0.762303	0.781944	0.971691
DCPFCH_04515	3	53	1	44		0.626591	2.47015	0.885125
DCPFCH_04525	3	53	1	44		0.626591	2.47015	0.885125
DCPFCH_04545	7	49	8	37		0.575941	0.663478	0.871834
DCPFCH_04740	2	54	0	45		0.50099	Inf	0.801457
DCPFCH_05310	4	52	3	42		1	1.07616	1
DCPFCH_05830	3	53	1	44		0.626591	2.47015	0.885125
DCPFCH_06125	3	53	1	44		0.626591	2.47015	0.885125
DCPFCH_06215	3	53	1	44		0.626591	2.47015	0.885125
DCPFCH_07595	4	52	4	41		1	0.79034	1
DCPFCH_07795	5	51	6	39		0.533012	0.640152	0.833182
DCPFCH_08045	3	53	1	44		0.626591	2.47015	0.885125
DDKKGJ_00100	4	52	9	36		0.0742139	0.311333	0.633448
DDKKGJ_00250	7	49	8	37		0.575941	0.663478	0.871834
DDKKGJ_00290	7	49	9	36		0.412201	0.574668	0.774833
DDKKGJ_00300	7	49	10	35		0.284584	0.503501	0.745426
DDKKGJ_00705	2	54	8	37		0.0218802	0.17417	0.633448
DDKKGJ_00760	4	52	9	36		0.0742139	0.311333	0.633448
DDKKGJ_01415	3	53	7	38		0.105099	0.310873	0.633448
DDKKGJ_01765	1	55	2	43		0.584158	0.394511	0.871834
DDKKGJ_03040	3	53	7	38		0.105099	0.310873	0.633448
DDKKGJ_03070	3	53	8	37		0.0583858	0.265261	0.633448
DDKKGJ_04270	3	53	9	36		0.0313187	0.229735	0.633448
DDKKGJ_04900	4	52	9	36		0.0742139	0.311333	0.633448
DDKKGJ_05305	4	52	9	36		0.0742139	0.311333	0.633448
DDKKGJ_05785	0	56	5	40		0.0154245	0	0.633448
DDKKGJ_06390	1	55	5	40		0.0860322	0.147934	0.633448
DDKKGJ_06795	3	53	8	37		0.0583858	0.265261	0.633448
DDKKGJ_07580	7	49	10	35		0.284584	0.503501	0.745426
DDKKGJ_08065	2	54	7	38		0.0739063	0.204145	0.633448
DDKKGJ_08225	4	52	10	35		0.0418207	0.27278	0.633448
DDKKGJ_09205	3	53	9	36		0.0313187	0.229735	0.633448
DFGBPA_00855	1	55	0	45		1	Inf	1
DFGBPA_01000	10	46	14	31		0.158914	0.484946	0.676725
DFGBPA_01165	1	55	0	45		1	Inf	1
DFGBPA_01790	13	43	15	30		0.273419	0.607739	0.745426
DFGBPA_02135	11	45	14	31		0.246655	0.544628	0.745426
DFGBPA_02480	7	49	6	39		1	0.929255	1
DFGBPA_03075	10	46	14	31		0.158914	0.484946	0.676725
DFGBPA_03495	3	53	3	42		1	0.7943	1
DFGBPA_03735	17	39	18	27		0.400594	0.656656	0.772276
DFGBPA_04715	3	53	1	44		0.626591	2.47015	0.885125
DFGBPA_04720	22	34	20	25		0.685878	0.810537	0.925908
DFGBPA_05765	2	54	0	45		0.50099	Inf	0.801457
DFGBPA_06810	4	52	6	39		0.334006	0.503476	0.745426
DFGBPA_08160	7	49	6	39		1	0.929255	1
DFGBPA_08505	7	49	3	42		0.505296	1.98697	0.801457
DFGBPA_09290	1	55	0	45		1	Inf	1
DFGBPA_09365	1	55	0	45		1	Inf	1
DFGBPA_09810	2	54	0	45		0.50099	Inf	0.801457
DFGBPA_09880	11	45	14	31		0.246655	0.544628	0.745426
DFGBPA_10130	4	52	11	34		0.0228419	0.241201	0.633448
DJCBPA_02050	4	52	2	43		0.689628	1.64593	0.925908
DJCBPA_02590	6	50	7	38		0.555876	0.654246	0.860991
DJCBPA_03115	4	52	3	42		1	1.07616	1
DJCBPA_04315	4	52	1	44		0.377652	3.34922	0.772276
DJCBPA_05160	7	49	9	36		0.412201	0.574668	0.774833
DJCBPA_05200	4	52	3	42		1	1.07616	1
DJCBPA_05300	3	53	0	45		0.251485	Inf	0.745426
DJCBPA_05330	5	51	2	43		0.456849	2.09322	0.778506
DJCBPA_06660	3	53	1	44		0.626591	2.47015	0.885125
DJCBPA_08300	1	55	0	45		1	Inf	1
DJCGGI_00900	4	52	3	42		1	1.07616	1
DJCGGI_01650	6	50	7	38		0.555876	0.654246	0.860991
DJCGGI_02180	5	51	3	42		0.729215	1.36833	0.946784
DJCGGI_03720	3	53	1	44		0.626591	2.47015	0.885125
DJCGGI_04155	3	53	1	44		0.626591	2.47015	0.885125
DJCGGI_04755	3	53	1	44		0.626591	2.47015	0.885125
DJCGGI_04795	7	49	10	35		0.284584	0.503501	0.745426
DJCGGI_04915	7	49	9	36		0.412201	0.574668	0.774833
DJCGGI_04925	3	53	1	44		0.626591	2.47015	0.885125
DJCGGI_04945	6	50	2	43		0.293429	2.55771	0.745426
DJCGGI_05470	3	53	1	44		0.626591	2.47015	0.885125
DJCGGI_05900	4	52	1	44		0.377652	3.34922	0.772276
DJCGGI_06515	3	53	1	44		0.626591	2.47015	0.885125
DJCGGI_07755	4	52	4	41		1	0.79034	1
DJCGGI_07960	3	53	1	44		0.626591	2.47015	0.885125
DJCGGI_08220	3	53	1	44		0.626591	2.47015	0.885125
DJCGGI_08990	4	52	1	44		0.377652	3.34922	0.772276
DJCGGI_09795	4	52	1	44		0.377652	3.34922	0.772276
DKCNHM_02135	23	33	22	23		0.546038	0.730965	0.849075
DKCNHM_02795	1	55	0	45		1	Inf	1
DKCNHM_03670	21	35	19	26		0.684968	0.822669	0.925908
DKCNHM_03870	5	51	4	41		1	1.00485	1
DKCNHM_03875	12	44	14	31		0.360183	0.606988	0.772276
DKCNHM_04380	2	54	0	45		0.50099	Inf	0.801457
DKCNHM_04640	10	46	13	32		0.235126	0.538499	0.745426
DKCNHM_05010	8	48	3	42		0.337261	2.31503	0.745426
DKCNHM_05500	2	54	0	45		0.50099	Inf	0.801457
DKCNHM_06155	5	51	3	42		0.729215	1.36833	0.946784
DKCNHM_07775	11	45	13	32		0.348593	0.604811	0.75987
DKCNHM_07855	2	54	0	45		0.50099	Inf	0.801457
DKCNHM_08390	18	38	17	28		0.674465	0.782126	0.925908
DKCNHM_09180	2	54	0	45		0.50099	Inf	0.801457
DKCNHM_09295	11	45	10	35		0.808048	0.856887	1
DKCNHM_09665	12	44	15	30		0.257912	0.548796	0.745426
DKCNHM_10025	7	49	6	39		1	0.929255	1
DKCNHM_10575	11	45	15	30		0.169098	0.492449	0.676725
DKCNHM_10715	2	54	0	45		0.50099	Inf	0.801457
DKCNHM_10810	1	55	2	43		0.584158	0.394511	0.871834
DKCNHM_10905	4	52	10	35		0.0418207	0.27278	0.633448
DMDOFA_00875	4	52	10	35		0.0418207	0.27278	0.633448
DMDOFA_01090	7	49	9	36		0.412201	0.574668	0.774833
DMDOFA_02295	4	52	8	37		0.127306	0.35946	0.676725
DMDOFA_02720	3	53	7	38		0.105099	0.310873	0.633448
DMDOFA_04440	3	53	8	37		0.0583858	0.265261	0.633448
DMDOFA_05310	4	52	9	36		0.0742139	0.311333	0.633448
DMDOFA_05355	3	53	8	37		0.0583858	0.265261	0.633448
DMDOFA_05480	7	49	10	35		0.284584	0.503501	0.745426
DMDOFA_05490	4	52	9	36		0.0742139	0.311333	0.633448
DMDOFA_05530	7	49	8	37		0.575941	0.663478	0.871834
DMDOFA_05975	3	53	3	42		1	0.7943	1
DMDOFA_06730	3	53	4	41		0.696979	0.583368	0.926187
DMDOFA_07185	6	50	6	39		0.762303	0.781944	0.971691
DMDOFA_07750	7	49	10	35		0.284584	0.503501	0.745426
DMDOFA_08000	3	53	7	38		0.105099	0.310873	0.633448
DMDOFA_08025	1	55	0	45		1	Inf	1
DMDOFA_09230	3	53	9	36		0.0313187	0.229735	0.633448
DMDOFA_09340	4	52	1	44		0.377652	3.34922	0.772276
DMFPHE_01110	4	52	10	35		0.0418207	0.27278	0.633448
DMFPHE_01315	7	49	10	35		0.284584	0.503501	0.745426
DMFPHE_01955	6	50	10	35		0.16993	0.423692	0.676725
DMFPHE_02540	7	49	10	35		0.284584	0.503501	0.745426
DMFPHE_02795	4	52	8	37		0.127306	0.35946	0.676725
DMFPHE_03165	3	53	7	38		0.105099	0.310873	0.633448
DMFPHE_04610	4	52	9	36		0.0742139	0.311333	0.633448
DMFPHE_05265	4	52	9	36		0.0742139	0.311333	0.633448
DMFPHE_05310	7	49	10	35		0.284584	0.503501	0.745426
DMFPHE_05440	5	51	9	36		0.148997	0.395864	0.676725
DMFPHE_05450	7	49	10	35		0.284584	0.503501	0.745426
DMFPHE_05485	7	49	8	37		0.575941	0.663478	0.871834
DMFPHE_05930	3	53	3	42		1	0.7943	1
DMFPHE_06120	1	55	1	44		1	0.801788	1
DMFPHE_06675	4	52	3	42		1	1.07616	1
DMFPHE_07785	3	53	9	36		0.0313187	0.229735	0.633448
DMFPHE_08965	3	53	9	36		0.0313187	0.229735	0.633448
DMFPHE_09065	3	53	9	36		0.0313187	0.229735	0.633448
DNBDFF_00140	13	43	14	31		0.49789	0.672151	0.801457
DNBDFF_00960	6	50	3	42		0.727468	1.67168	0.946784
DNBDFF_01095	6	50	4	41		1	1.22751	1
DNBDFF_02650	12	44	8	37		0.802564	1.25849	1
DNBDFF_02765	3	53	0	45		0.251485	Inf	0.745426
DNBDFF_02770	1	55	0	45		1	Inf	1
DNBDFF_02880	9	47	5	40		0.56929	1.52559	0.871834
DNBDFF_03740	7	49	5	40		1	1.14136	1
DNBDFF_04600	32	24	20	25		0.233402	1.6582	0.745426
DNBDFF_05000	3	53	3	42		1	0.7943	1
DNBDFF_05705	3	53	2	43		1	1.21464	1
DNBDFF_05960	8	48	9	36		0.593689	0.669396	0.879979
DNBDFF_06735	7	49	5	40		1	1.14136	1
DNBDFF_07025	7	49	4	41		0.750418	1.45888	0.963259
DNBDFF_07230	3	53	1	44		0.626591	2.47015	0.885125
DNBDFF_07385	6	50	3	42		0.727468	1.67168	0.946784
DOLCOI_00385	7	49	10	35		0.284584	0.503501	0.745426
DOLCOI_00965	7	49	10	35		0.284584	0.503501	0.745426
DOLCOI_01965	3	53	7	38		0.105099	0.310873	0.633448
DOLCOI_01995	3	53	8	37		0.0583858	0.265261	0.633448
DOLCOI_03545	4	52	9	36		0.0742139	0.311333	0.633448
DOLCOI_03950	4	52	9	36		0.0742139	0.311333	0.633448
DOLCOI_04430	0	56	5	40		0.0154245	0	0.633448
DOLCOI_05035	1	55	5	40		0.0860322	0.147934	0.633448
DOLCOI_06255	3	53	7	38		0.105099	0.310873	0.633448
DOLCOI_07555	4	52	10	35		0.0418207	0.27278	0.633448
DOLCOI_07715	7	49	10	35		0.284584	0.503501	0.745426
DOLCOI_07750	3	53	9	36		0.0313187	0.229735	0.633448
DOLCOI_08195	4	52	9	36		0.0742139	0.311333	0.633448
DOLCOI_08250	7	49	10	35		0.284584	0.503501	0.745426
DOLCOI_08370	7	49	10	35		0.284584	0.503501	0.745426
DOLCOI_08380	7	49	9	36		0.412201	0.574668	0.774833
DOLCOI_08420	7	49	8	37		0.575941	0.663478	0.871834
DOLCOI_09005	4	52	9	36		0.0742139	0.311333	0.633448
DOLCOI_09185	3	53	9	36		0.0313187	0.229735	0.633448
Deoxycytidine_kinase	3	53	1	44		0.626591	2.47015	0.885125
EAMEJM_00245	3	53	6	39		0.182022	0.371588	0.687576
EAMEJM_00755	3	53	7	38		0.105099	0.310873	0.633448
EAMEJM_00770	3	53	5	40		0.461009	0.456415	0.778506
EAMEJM_00775	3	53	7	38		0.105099	0.310873	0.633448
EAMEJM_00955	2	54	3	42		0.653538	0.521931	0.905955
EAMEJM_01625	2	54	4	41		0.402714	0.383263	0.772276
EAMEJM_02475	2	54	4	41		0.402714	0.383263	0.772276
EAMEJM_02770	0	56	1	44		0.445545	0	0.778506
EAMEJM_03280	5	51	4	41		1	1.00485	1
EAMEJM_04440	2	54	4	41		0.402714	0.383263	0.772276
EAMEJM_04470	2	54	4	41		0.402714	0.383263	0.772276
EAMEJM_05185	9	47	6	39		0.783341	1.24201	0.993189
EAMEJM_05630	2	54	4	41		0.402714	0.383263	0.772276
EAMEJM_06730	11	45	10	35		0.808048	0.856887	1
EAMEJM_07175	2	54	4	41		0.402714	0.383263	0.772276
EAMEJM_08095	0	56	1	44		0.445545	0	0.778506
EAMEJM_08115	2	54	4	41		0.402714	0.383263	0.772276
EAMEJM_09130	2	54	4	41		0.402714	0.383263	0.772276
EAMEJM_09165	1	55	3	42		0.321075	0.257842	0.745426
EAMEJM_09605	2	54	4	41		0.402714	0.383263	0.772276
EAOBLI_00425	3	53	3	42		1	0.7943	1
EAOBLI_01075	5	51	4	41		1	1.00485	1
EAOBLI_01170	12	44	9	36		1	1.08995	1
EAOBLI_01175	3	53	3	42		1	0.7943	1
EAOBLI_01250	7	49	5	40		1	1.14136	1
EAOBLI_01550	4	52	1	44		0.377652	3.34922	0.772276
EAOBLI_01890	4	52	1	44		0.377652	3.34922	0.772276
EAOBLI_03255	6	50	5	40		1	0.960368	1
EAOBLI_03450	2	54	2	43		1	0.798113	1
EAOBLI_04140	3	53	3	42		1	0.7943	1
EAOBLI_04305	7	49	5	40		1	1.14136	1
EAOBLI_05160	1	55	2	43		0.584158	0.394511	0.871834
EAOBLI_05465	32	24	22	23		0.429397	1.38931	0.778506
EAOBLI_06495	5	51	5	40		0.748204	0.786224	0.963259
EAOBLI_07155	2	54	2	43		1	0.798113	1
EAOBLI_07525	28	28	22	23		1	1.04502	1
EBJDFK_00455	15	41	10	35		0.648535	1.27737	0.905955
EBJDFK_00825	6	50	4	41		1	1.22751	1
EBJDFK_01370	3	53	0	45		0.251485	Inf	0.745426
EBJDFK_01900	11	45	10	35		0.808048	0.856887	1
EBJDFK_01945	6	50	2	43		0.293429	2.55771	0.745426
EBJDFK_02135	8	48	3	42		0.337261	2.31503	0.745426
EBJDFK_02375	5	51	4	41		1	1.00485	1
EBJDFK_02410	8	48	3	42		0.337261	2.31503	0.745426
EBJDFK_02865	6	50	4	41		1	1.22751	1
EBJDFK_03835	8	48	3	42		0.337261	2.31503	0.745426
EBJDFK_05055	8	48	3	42		0.337261	2.31503	0.745426
EBJDFK_05070	2	54	1	44		1	1.62208	1
EBJDFK_05075	11	45	4	41		0.164998	2.4841	0.676725
EBJDFK_05080	11	45	4	41		0.164998	2.4841	0.676725
EBJDFK_05970	8	48	4	41		0.540452	1.69957	0.842042
EBJDFK_05975	3	53	1	44		0.626591	2.47015	0.885125
EBJDFK_06385	8	48	3	42		0.337261	2.31503	0.745426
EBJDFK_06450	8	48	3	42		0.337261	2.31503	0.745426
EBJDFK_06715	7	49	3	42		0.505296	1.98697	0.801457
EBJDFK_07330	8	48	3	42		0.337261	2.31503	0.745426
EBJDFK_07880	6	50	3	42		0.727468	1.67168	0.946784
EBJDFK_07885	8	48	3	42		0.337261	2.31503	0.745426
EBJDFK_08015	8	48	3	42		0.337261	2.31503	0.745426
EBJDFK_08670	3	53	1	44		0.626591	2.47015	0.885125
ECEKJL_01280	7	49	6	39		1	0.929255	1
ECEKJL_01425	32	24	22	23		0.429397	1.38931	0.778506
ECEKJL_01855	12	44	15	30		0.257912	0.548796	0.745426
ECEKJL_01970	11	45	15	30		0.169098	0.492449	0.676725
ECEKJL_03170	4	52	10	35		0.0418207	0.27278	0.633448
ECEKJL_03425	25	31	22	23		0.692872	0.844541	0.925908
ECEKJL_03555	12	44	14	31		0.360183	0.606988	0.772276
ECEKJL_03560	1	55	4	41		0.168988	0.189235	0.676725
ECEKJL_03780	25	31	22	23		0.692872	0.844541	0.925908
ECEKJL_03860	10	46	14	31		0.158914	0.484946	0.676725
ECEKJL_04140	2	54	0	45		0.50099	Inf	0.801457
ECEKJL_04375	13	43	15	30		0.273419	0.607739	0.745426
ECEKJL_04660	2	54	0	45		0.50099	Inf	0.801457
ECEKJL_05800	2	54	0	45		0.50099	Inf	0.801457
ECEKJL_06735	10	46	13	32		0.235126	0.538499	0.745426
ECEKJL_06930	8	48	3	42		0.337261	2.31503	0.745426
ECEKJL_07570	11	45	14	31		0.246655	0.544628	0.745426
ECEKJL_07820	2	54	0	45		0.50099	Inf	0.801457
ECEKJL_08015	11	45	14	31		0.246655	0.544628	0.745426
ECEKJL_08195	9	47	6	39		0.783341	1.24201	0.993189
ECEKJL_08410	5	51	3	42		0.729215	1.36833	0.946784
ECEKJL_09825	2	54	0	45		0.50099	Inf	0.801457
EHFKIP_00455	29	27	23	22		1	1.02711	1
EHFKIP_00795	2	54	1	44		1	1.62208	1
EHFKIP_01150	11	45	9	36		1	0.977989	1
EHFKIP_01520	11	45	10	35		0.808048	0.856887	1
EHFKIP_01635	1	55	1	44		1	0.801788	1
EHFKIP_01840	1	55	1	44		1	0.801788	1
EHFKIP_02155	32	24	22	23		0.429397	1.38931	0.778506
EHFKIP_02795	6	50	6	39		0.762303	0.781944	0.971691
EHFKIP_03645	12	44	15	30		0.257912	0.548796	0.745426
EHFKIP_03735	6	50	3	42		0.727468	1.67168	0.946784
EHFKIP_03835	9	47	10	35		0.454074	0.672921	0.778506
EHFKIP_06155	1	55	0	45		1	Inf	1
EHFKIP_08000	8	48	3	42		0.337261	2.31503	0.745426
EHFKIP_08185	2	54	2	43		1	0.798113	1
EHFKIP_08330	9	47	7	38		1	1.03912	1
EHFKIP_08335	8	48	7	38		1	0.905663	1
EHFKIP_08505	25	31	22	23		0.692872	0.844541	0.925908
EHFKIP_08880	9	47	4	41		0.375333	1.95022	0.772276
EHFKIP_09405	10	46	13	32		0.235126	0.538499	0.745426
EHFKIP_10220	10	46	14	31		0.158914	0.484946	0.676725
EIANDJ_00475	4	52	2	43		0.689628	1.64593	0.925908
EIANDJ_01120	6	50	1	44		0.12759	5.20983	0.676725
EIANDJ_01780	8	48	3	42		0.337261	2.31503	0.745426
EIANDJ_01915	8	48	3	42		0.337261	2.31503	0.745426
EIANDJ_01920	1	55	0	45		1	Inf	1
EIANDJ_02450	8	48	3	42		0.337261	2.31503	0.745426
EIANDJ_03675	7	49	3	42		0.505296	1.98697	0.801457
EIANDJ_04005	8	48	3	42		0.337261	2.31503	0.745426
EIANDJ_04175	8	48	3	42		0.337261	2.31503	0.745426
EIANDJ_04180	8	48	3	42		0.337261	2.31503	0.745426
EIANDJ_05190	11	45	4	41		0.164998	2.4841	0.676725
EIANDJ_05195	11	45	4	41		0.164998	2.4841	0.676725
EIANDJ_05205	8	48	3	42		0.337261	2.31503	0.745426
EIANDJ_06230	8	48	3	42		0.337261	2.31503	0.745426
EIANDJ_07010	6	50	4	41		1	1.22751	1
EIANDJ_07495	8	48	3	42		0.337261	2.31503	0.745426
EIANDJ_07530	5	51	4	41		1	1.00485	1
EIANDJ_07775	8	48	3	42		0.337261	2.31503	0.745426
EIANDJ_07960	6	50	2	43		0.293429	2.55771	0.745426
EIANDJ_08005	11	45	10	35		0.808048	0.856887	1
EIANDJ_09595	12	44	4	41		0.10516	2.76882	0.633448
EMEJDB_00190	4	52	2	43		0.689628	1.64593	0.925908
EMEJDB_00345	3	53	1	44		0.626591	2.47015	0.885125
EMEJDB_01345	3	53	1	44		0.626591	2.47015	0.885125
EMEJDB_02640	3	53	1	44		0.626591	2.47015	0.885125
EMEJDB_03535	5	51	3	42		0.729215	1.36833	0.946784
EMEJDB_04040	7	49	10	35		0.284584	0.503501	0.745426
EMEJDB_04645	4	52	1	44		0.377652	3.34922	0.772276
EMEJDB_04795	4	52	1	44		0.377652	3.34922	0.772276
EMEJDB_05625	3	53	1	44		0.626591	2.47015	0.885125
EMEJDB_05670	6	50	6	39		0.762303	0.781944	0.971691
EMEJDB_05790	3	53	1	44		0.626591	2.47015	0.885125
EMEJDB_05800	3	53	1	44		0.626591	2.47015	0.885125
EMEJDB_05820	7	49	8	37		0.575941	0.663478	0.871834
EMEJDB_06205	4	52	3	42		1	1.07616	1
EMEJDB_06990	3	53	1	44		0.626591	2.47015	0.885125
EMEJDB_07670	2	54	0	45		0.50099	Inf	0.801457
EMEJDB_07760	3	53	1	44		0.626591	2.47015	0.885125
EMEJDB_08055	3	53	1	44		0.626591	2.47015	0.885125
EMEJDB_08705	5	51	6	39		0.533012	0.640152	0.833182
EMEJDB_08905	4	52	4	41		1	0.79034	1
ENDBJL_00070	9	47	2	43		0.105575	4.06739	0.633448
ENDBJL_00705	7	49	5	40		1	1.14136	1
ENDBJL_00825	6	50	4	41		1	1.22751	1
ENDBJL_02270	6	50	5	40		1	0.960368	1
ENDBJL_03050	3	53	3	42		1	0.7943	1
ENDBJL_03235	7	49	5	40		1	1.14136	1
ENDBJL_04090	12	44	12	33		0.639703	0.752169	0.902039
ENDBJL_05075	5	51	5	40		0.748204	0.786224	0.963259
ENDBJL_05745	3	53	3	42		1	0.7943	1
ENDBJL_05810	3	53	2	43		1	1.21464	1
ENDBJL_05815	3	53	3	42		1	0.7943	1
ENDBJL_05925	9	47	5	40		0.56929	1.52559	0.871834
ENDBJL_06475	7	49	3	42		0.505296	1.98697	0.801457
ENDBJL_06780	2	54	3	42		0.653538	0.521931	0.905955
ENKODN_00125	5	51	2	43		0.456849	2.09322	0.778506
ENKODN_03535	12	44	16	29		0.12477	0.497863	0.676725
ENKODN_03980	22	34	18	27		1	0.970862	1
ENKODN_04085	7	49	2	43		0.291966	3.04102	0.745426
ENKODN_04155	5	51	2	43		0.456849	2.09322	0.778506
ENKODN_04795	6	50	2	43		0.293429	2.55771	0.745426
ENKODN_04900	7	49	12	33		0.0794069	0.396601	0.633448
ENKODN_05620	0	56	1	44		0.445545	0	0.778506
ENKODN_07420	3	53	1	44		0.626591	2.47015	0.885125
ENKODN_07585	10	46	6	39		0.593555	1.40828	0.879979
ENKODN_07590	7	49	2	43		0.291966	3.04102	0.745426
ENKODN_08810	7	49	4	41		0.750418	1.45888	0.963259
ENKODN_09170	5	51	2	43		0.456849	2.09322	0.778506
ENKODN_09670	4	52	3	42		1	1.07616	1
ENKODN_09795	7	49	2	43		0.291966	3.04102	0.745426
EOEAFO_00470	6	50	10	35		0.16993	0.423692	0.676725
EOEAFO_02905	10	46	6	39		0.593555	1.40828	0.879979
EOEAFO_03015	3	53	0	45		0.251485	Inf	0.745426
EOEAFO_03020	10	46	6	39		0.593555	1.40828	0.879979
EOEAFO_03160	9	47	5	40		0.56929	1.52559	0.871834
EOEAFO_04110	7	49	5	40		1	1.14136	1
EOEAFO_05405	3	53	2	43		1	1.21464	1
EOEAFO_06070	3	53	2	43		1	1.21464	1
EOEAFO_06315	8	48	6	39		1	1.08251	1
EOEAFO_07115	7	49	5	40		1	1.14136	1
EOEAFO_07440	5	51	4	41		1	1.00485	1
EOEAFO_07650	3	53	2	43		1	1.21464	1
EOEAFO_07810	6	50	5	40		1	0.960368	1
EOEAFO_09275	6	50	5	40		1	0.960368	1
EOEAFO_09400	6	50	3	42		0.727468	1.67168	0.946784
FCMJMD_00930	9	47	3	42		0.217489	2.65674	0.745426
FCMJMD_02145	8	48	3	42		0.337261	2.31503	0.745426
FCMJMD_03635	11	45	10	35		0.808048	0.856887	1
FCMJMD_03850	8	48	3	42		0.337261	2.31503	0.745426
FCMJMD_04060	5	51	4	41		1	1.00485	1
FCMJMD_04690	7	49	3	42		0.505296	1.98697	0.801457
FCMJMD_05020	8	48	3	42		0.337261	2.31503	0.745426
FCMJMD_05190	8	48	4	41		0.540452	1.69957	0.842042
FCMJMD_05195	9	47	4	41		0.375333	1.95022	0.772276
FCMJMD_06160	12	44	6	39		0.433309	1.76293	0.778506
FCMJMD_06460	4	52	2	43		0.689628	1.64593	0.925908
FCMJMD_07140	6	50	4	41		1	1.22751	1
FCMJMD_07255	11	45	3	42		0.0830102	3.38437	0.633448
FCMJMD_07260	11	45	4	41		0.164998	2.4841	0.676725
FCMJMD_08125	8	48	3	42		0.337261	2.31503	0.745426
FCMJMD_08500	8	48	3	42		0.337261	2.31503	0.745426
FCMJMD_08590	2	54	0	45		0.50099	Inf	0.801457
FCMJMD_08930	1	55	0	45		1	Inf	1
FCMJMD_08955	8	48	3	42		0.337261	2.31503	0.745426
FCMJMD_10010	8	48	3	42		0.337261	2.31503	0.745426
FCMJMD_10015	1	55	0	45		1	Inf	1
FOJMPD_00865	2	54	1	44		1	1.62208	1
FOJMPD_01110	10	46	5	40		0.40792	1.72988	0.774833
FOJMPD_01570	28	28	23	22		1	0.956918	1
FOJMPD_01655	6	50	2	43		0.293429	2.55771	0.745426
FOJMPD_01725	7	49	4	41		0.750418	1.45888	0.963259
FOJMPD_02360	0	56	1	44		0.445545	0	0.778506
FOJMPD_02455	6	50	3	42		0.727468	1.67168	0.946784
FOJMPD_04230	15	41	15	30		0.516289	0.734007	0.816169
FOJMPD_04405	10	46	5	40		0.40792	1.72988	0.774833
FOJMPD_04410	7	49	2	43		0.291966	3.04102	0.745426
FOJMPD_05680	7	49	3	42		0.505296	1.98697	0.801457
FOJMPD_05965	2	54	1	44		1	1.62208	1
FOJMPD_06655	7	49	3	42		0.505296	1.98697	0.801457
FOJMPD_08240	24	32	22	23		0.554463	0.785997	0.860991
FOJMPD_08730	7	49	3	42		0.505296	1.98697	0.801457
GAJJLC_00370	3	53	9	36		0.0313187	0.229735	0.633448
GAJJLC_00460	4	52	4	41		1	0.79034	1
GAJJLC_01070	1	55	0	45		1	Inf	1
GAJJLC_02360	3	53	7	38		0.105099	0.310873	0.633448
GAJJLC_02660	1	55	2	43		0.584158	0.394511	0.871834
GAJJLC_03625	4	52	9	36		0.0742139	0.311333	0.633448
GAJJLC_03675	3	53	9	36		0.0313187	0.229735	0.633448
GAJJLC_03800	4	52	10	35		0.0418207	0.27278	0.633448
GAJJLC_03810	7	49	10	35		0.284584	0.503501	0.745426
GAJJLC_03850	4	52	7	38		0.210441	0.421243	0.744023
GAJJLC_04415	1	55	4	41		0.168988	0.189235	0.676725
GAJJLC_04470	1	55	1	44		1	0.801788	1
GAJJLC_05000	1	55	0	45		1	Inf	1
GAJJLC_05765	1	55	8	37		0.00983236	0.0858834	0.633448
GAJJLC_06140	4	52	6	39		0.334006	0.503476	0.745426
GAJJLC_06555	2	54	3	42		0.653538	0.521931	0.905955
GAJJLC_07100	7	49	10	35		0.284584	0.503501	0.745426
GAJJLC_08055	4	52	10	35		0.0418207	0.27278	0.633448
GAJJLC_08215	7	49	10	35		0.284584	0.503501	0.745426
GAJJLC_08585	3	53	7	38		0.105099	0.310873	0.633448
GAJJLC_08610	3	53	9	36		0.0313187	0.229735	0.633448
GAJJLC_09080	3	53	7	38		0.105099	0.310873	0.633448
GBAHFN_00040	11	45	10	35		0.808048	0.856887	1
GBAHFN_00595	0	56	2	43		0.19604	0	0.698336
GBAHFN_02285	3	53	7	38		0.105099	0.310873	0.633448
GBAHFN_02290	0	56	4	41		0.0364922	0	0.633448
GBAHFN_02305	3	53	7	38		0.105099	0.310873	0.633448
GBAHFN_02760	0	56	1	44		0.445545	0	0.778506
GBAHFN_02795	0	56	2	43		0.19604	0	0.698336
GBAHFN_02990	3	53	5	40		0.461009	0.456415	0.778506
GBAHFN_06670	0	56	2	43		0.19604	0	0.698336
GBAHFN_06940	3	53	3	42		1	0.7943	1
GBAHFN_07385	0	56	2	43		0.19604	0	0.698336
GBAHFN_07990	0	56	2	43		0.19604	0	0.698336
GBAHFN_08490	0	56	1	44		0.445545	0	0.778506
GBAHFN_09020	0	56	2	43		0.19604	0	0.698336
GBAHFN_11050	5	51	4	41		1	1.00485	1
GBAHFN_11225	0	56	2	43		0.19604	0	0.698336
GBKAOJ_00545	2	54	4	41		0.402714	0.383263	0.772276
GBKAOJ_00580	2	54	4	41		0.402714	0.383263	0.772276
GBKAOJ_01385	2	54	4	41		0.402714	0.383263	0.772276
GBKAOJ_02155	3	53	7	38		0.105099	0.310873	0.633448
GBKAOJ_02605	2	54	4	41		0.402714	0.383263	0.772276
GBKAOJ_03585	2	54	4	41		0.402714	0.383263	0.772276
GBKAOJ_04415	5	51	4	41		1	1.00485	1
GBKAOJ_04960	2	54	4	41		0.402714	0.383263	0.772276
GBKAOJ_05620	2	54	3	42		0.653538	0.521931	0.905955
GBKAOJ_05800	3	53	7	38		0.105099	0.310873	0.633448
GBKAOJ_05805	3	53	5	40		0.461009	0.456415	0.778506
GBKAOJ_05820	3	53	7	38		0.105099	0.310873	0.633448
GBKAOJ_06955	11	45	10	35		0.808048	0.856887	1
GBKAOJ_07405	2	54	4	41		0.402714	0.383263	0.772276
GBKAOJ_08300	2	54	4	41		0.402714	0.383263	0.772276
GBKAOJ_08840	2	54	4	41		0.402714	0.383263	0.772276
GBKAOJ_08860	2	54	0	45		0.50099	Inf	0.801457
GBKAOJ_09645	3	53	7	38		0.105099	0.310873	0.633448
GCOIEL_01205	8	48	2	43		0.178295	3.54374	0.676725
GCOIEL_01890	8	48	2	43		0.178295	3.54374	0.676725
GCOIEL_02195	8	48	2	43		0.178295	3.54374	0.676725
GCOIEL_02200	8	48	2	43		0.178295	3.54374	0.676725
GCOIEL_02445	2	54	2	43		1	0.798113	1
GCOIEL_02450	8	48	2	43		0.178295	3.54374	0.676725
GCOIEL_04835	8	48	2	43		0.178295	3.54374	0.676725
GCOIEL_04955	8	48	2	43		0.178295	3.54374	0.676725
GCOIEL_05155	8	48	2	43		0.178295	3.54374	0.676725
GCOIEL_05500	8	48	2	43		0.178295	3.54374	0.676725
GCOIEL_06240	2	54	2	43		1	0.798113	1
GCOIEL_06750	5	51	2	43		0.456849	2.09322	0.778506
GCOIEL_08290	14	42	3	42		0.0165634	4.60298	0.633448
GCOIEL_09405	1	55	2	43		0.584158	0.394511	0.871834
GCOIEL_10020	1	55	2	43		0.584158	0.394511	0.871834
GDACIC_00190	4	52	2	43		0.689628	1.64593	0.925908
GDACIC_00345	3	53	1	44		0.626591	2.47015	0.885125
GDACIC_01345	3	53	1	44		0.626591	2.47015	0.885125
GDACIC_02300	7	49	10	35		0.284584	0.503501	0.745426
GDACIC_02805	7	49	10	35		0.284584	0.503501	0.745426
GDACIC_03685	3	53	1	44		0.626591	2.47015	0.885125
GDACIC_04855	4	52	1	44		0.377652	3.34922	0.772276
GDACIC_05005	4	52	1	44		0.377652	3.34922	0.772276
GDACIC_05575	7	49	8	37		0.575941	0.663478	0.871834
GDACIC_05595	7	49	10	35		0.284584	0.503501	0.745426
GDACIC_05605	3	53	1	44		0.626591	2.47015	0.885125
GDACIC_05725	6	50	9	36		0.261704	0.483556	0.745426
GDACIC_05770	3	53	1	44		0.626591	2.47015	0.885125
GDACIC_06770	2	54	0	45		0.50099	Inf	0.801457
GDACIC_06800	4	52	3	42		1	1.07616	1
GDACIC_07635	4	52	4	41		1	0.79034	1
GDACIC_07835	6	50	10	35		0.16993	0.423692	0.676725
GDACIC_08085	3	53	1	44		0.626591	2.47015	0.885125
GDACIC_08370	3	53	1	44		0.626591	2.47015	0.885125
GDACIC_08705	3	53	1	44		0.626591	2.47015	0.885125
GFIEMM_00485	3	53	3	42		1	0.7943	1
GFIEMM_00650	7	49	5	40		1	1.14136	1
GFIEMM_01715	2	54	0	45		0.50099	Inf	0.801457
GFIEMM_03630	7	49	5	40		1	1.14136	1
GFIEMM_04225	16	40	14	31		0.828773	0.886784	1
GFIEMM_04935	5	51	4	41		1	1.00485	1
GFIEMM_05015	3	53	2	43		1	1.21464	1
GFIEMM_05020	3	53	3	42		1	0.7943	1
GFIEMM_05095	7	49	5	40		1	1.14136	1
GFIEMM_05375	5	51	3	42		0.729215	1.36833	0.946784
GFIEMM_05670	3	53	3	42		1	0.7943	1
GFIEMM_06025	2	54	2	43		1	0.798113	1
GFIEMM_06230	7	49	5	40		1	1.14136	1
GFIEMM_07695	1	55	1	44		1	0.801788	1
GFIEMM_08245	4	52	4	41		1	0.79034	1
GGMAOG_00125	24	32	22	23		0.554463	0.785997	0.860991
GGMAOG_00775	7	49	5	40		1	1.14136	1
GGMAOG_00950	3	53	3	42		1	0.7943	1
GGMAOG_01550	1	55	1	44		1	0.801788	1
GGMAOG_02480	7	49	5	40		1	1.14136	1
GGMAOG_03230	3	53	3	42		1	0.7943	1
GGMAOG_03385	7	49	5	40		1	1.14136	1
GGMAOG_04540	2	54	0	45		0.50099	Inf	0.801457
GGMAOG_04690	31	25	19	26		0.231361	1.68792	0.745426
GGMAOG_05580	3	53	3	42		1	0.7943	1
GGMAOG_06255	5	51	4	41		1	1.00485	1
GGMAOG_06355	12	44	9	36		1	1.08995	1
GGMAOG_06360	3	53	3	42		1	0.7943	1
GGMAOG_06435	7	49	5	40		1	1.14136	1
GGMAOG_06745	5	51	4	41		1	1.00485	1
GGMAOG_07080	2	54	1	44		1	1.62208	1
GGMAOG_08880	2	54	2	43		1	0.798113	1
GHBPIN_00165	11	45	4	41		0.164998	2.4841	0.676725
GHBPIN_00170	11	45	4	41		0.164998	2.4841	0.676725
GHBPIN_00175	2	54	1	44		1	1.62208	1
GHBPIN_00190	8	48	3	42		0.337261	2.31503	0.745426
GHBPIN_00730	32	24	22	23		0.429397	1.38931	0.778506
GHBPIN_01425	8	48	3	42		0.337261	2.31503	0.745426
GHBPIN_02395	6	50	4	41		1	1.22751	1
GHBPIN_02850	8	48	3	42		0.337261	2.31503	0.745426
GHBPIN_02885	5	51	4	41		1	1.00485	1
GHBPIN_03125	8	48	3	42		0.337261	2.31503	0.745426
GHBPIN_03315	6	50	2	43		0.293429	2.55771	0.745426
GHBPIN_03360	11	45	10	35		0.808048	0.856887	1
GHBPIN_03890	3	53	0	45		0.251485	Inf	0.745426
GHBPIN_04435	6	50	4	41		1	1.22751	1
GHBPIN_04805	15	41	10	35		0.648535	1.27737	0.905955
GHBPIN_06090	3	53	1	44		0.626591	2.47015	0.885125
GHBPIN_07100	8	48	3	42		0.337261	2.31503	0.745426
GHBPIN_07230	8	48	3	42		0.337261	2.31503	0.745426
GHBPIN_07235	6	50	3	42		0.727468	1.67168	0.946784
GHBPIN_07785	8	48	3	42		0.337261	2.31503	0.745426
GHBPIN_08925	7	49	3	42		0.505296	1.98697	0.801457
GHBPIN_09190	8	48	3	42		0.337261	2.31503	0.745426
GHBPIN_09255	8	48	3	42		0.337261	2.31503	0.745426
GHBPIN_09665	3	53	1	44		0.626591	2.47015	0.885125
GHBPIN_09670	8	48	4	41		0.540452	1.69957	0.842042
GMIFDB_00390	1	55	0	45		1	Inf	1
GMIFDB_00525	1	55	0	45		1	Inf	1
GMIFDB_00605	1	55	0	45		1	Inf	1
GMIFDB_00655	1	55	0	45		1	Inf	1
GMIFDB_00710	1	55	0	45		1	Inf	1
GMIFDB_01850	1	55	0	45		1	Inf	1
GMIFDB_02415	1	55	0	45		1	Inf	1
GMIFDB_02720	1	55	0	45		1	Inf	1
GMIFDB_03535	1	55	0	45		1	Inf	1
GMIFDB_03920	1	55	0	45		1	Inf	1
GMIFDB_04210	1	55	0	45		1	Inf	1
GMIFDB_04215	1	55	0	45		1	Inf	1
GMIFDB_04250	1	55	0	45		1	Inf	1
GMIFDB_04415	1	55	0	45		1	Inf	1
GMIFDB_04685	1	55	0	45		1	Inf	1
GMIFDB_05480	1	55	0	45		1	Inf	1
GMIFDB_05835	1	55	0	45		1	Inf	1
GMIFDB_06350	1	55	0	45		1	Inf	1
GMIFDB_06845	1	55	0	45		1	Inf	1
GMIFDB_08190	1	55	0	45		1	Inf	1
GMIFDB_08230	1	55	0	45		1	Inf	1
GMIFDB_08640	1	55	0	45		1	Inf	1
GMIFDB_09005	1	55	0	45		1	Inf	1
GMIFDB_09490	1	55	0	45		1	Inf	1
GMLADM_01070	4	52	10	35		0.0418207	0.27278	0.633448
GMLADM_01310	7	49	10	35		0.284584	0.503501	0.745426
GMLADM_02000	7	49	10	35		0.284584	0.503501	0.745426
GMLADM_02570	2	54	3	42		0.653538	0.521931	0.905955
GMLADM_03075	4	52	3	42		1	1.07616	1
GMLADM_03655	0	56	1	44		0.445545	0	0.778506
GMLADM_03710	1	55	4	41		0.168988	0.189235	0.676725
GMLADM_04095	4	52	9	36		0.0742139	0.311333	0.633448
GMLADM_04750	2	54	6	39		0.134377	0.244052	0.676725
GMLADM_04790	7	49	10	35		0.284584	0.503501	0.745426
GMLADM_04800	7	49	10	35		0.284584	0.503501	0.745426
GMLADM_04930	7	49	10	35		0.284584	0.503501	0.745426
GMLADM_04975	4	52	9	36		0.0742139	0.311333	0.633448
GMLADM_05685	4	52	9	36		0.0742139	0.311333	0.633448
GMLADM_07530	1	55	8	37		0.00983236	0.0858834	0.633448
GMLADM_07925	4	52	9	36		0.0742139	0.311333	0.633448
GMLADM_08820	3	53	7	38		0.105099	0.310873	0.633448
GMLADM_08845	3	53	9	36		0.0313187	0.229735	0.633448
GMLADM_10645	3	53	9	36		0.0313187	0.229735	0.633448
GMLADM_10790	3	53	9	36		0.0313187	0.229735	0.633448
GOGCFM_00370	8	48	3	42		0.337261	2.31503	0.745426
GOGCFM_00700	6	50	6	39		0.762303	0.781944	0.971691
GOGCFM_01235	12	44	15	30		0.257912	0.548796	0.745426
GOGCFM_01355	10	46	12	33		0.336585	0.600946	0.745426
GOGCFM_01450	11	45	14	31		0.246655	0.544628	0.745426
GOGCFM_02875	10	46	14	31		0.158914	0.484946	0.676725
GOGCFM_03030	5	51	2	43		0.456849	2.09322	0.778506
GOGCFM_03875	10	46	9	36		0.803097	0.870777	1
GOGCFM_04205	18	38	17	28		0.674465	0.782126	0.925908
GOGCFM_04555	28	28	23	22		1	0.956918	1
GOGCFM_05260	7	49	4	41		0.750418	1.45888	0.963259
GOGCFM_06265	10	46	5	40		0.40792	1.72988	0.774833
GOGCFM_06655	1	55	3	42		0.321075	0.257842	0.745426
GOGCFM_07165	17	39	16	29		0.67081	0.791928	0.925908
GOGCFM_07310	22	34	20	25		0.685878	0.810537	0.925908
GOGCFM_07315	1	55	1	44		1	0.801788	1
GOGCFM_07435	3	53	1	44		0.626591	2.47015	0.885125
GOGCFM_09235	10	46	13	32		0.235126	0.538499	0.745426
GOIBIF_00445	10	46	14	31		0.158914	0.484946	0.676725
GOIBIF_01345	8	48	8	37		0.785021	0.772847	0.993189
GOIBIF_01895	5	51	1	44		0.221664	4.26175	0.745426
GOIBIF_02335	29	27	23	22		1	1.02711	1
GOIBIF_03090	9	47	13	32		0.148656	0.474963	0.676725
GOIBIF_03095	22	34	21	24		0.544648	0.741735	0.848023
GOIBIF_03270	25	31	22	23		0.692872	0.844541	0.925908
GOIBIF_03870	18	38	17	28		0.674465	0.782126	0.925908
GOIBIF_05360	13	43	15	30		0.273419	0.607739	0.745426
GOIBIF_05450	12	44	15	30		0.257912	0.548796	0.745426
GOIBIF_05900	6	50	6	39		0.762303	0.781944	0.971691
GOIBIF_06560	25	31	22	23		0.692872	0.844541	0.925908
GOIBIF_08215	11	45	13	32		0.348593	0.604811	0.75987
GOIBIF_08460	0	56	1	44		0.445545	0	0.778506
GOIBIF_08715	0	56	3	42		0.0851485	0	0.633448
GOIBIF_09325	4	52	9	36		0.0742139	0.311333	0.633448
GOINND_00395	4	52	10	35		0.0418207	0.27278	0.633448
GOINND_01075	4	52	10	35		0.0418207	0.27278	0.633448
GOINND_01635	28	28	23	22		1	0.956918	1
GOINND_03385	10	46	15	30		0.104018	0.43849	0.633448
GOINND_03870	2	54	4	41		0.402714	0.383263	0.772276
GOINND_04020	10	46	15	30		0.104018	0.43849	0.633448
GOINND_04105	12	44	15	30		0.257912	0.548796	0.745426
GOINND_05260	17	39	17	28		0.526115	0.720344	0.827848
GOINND_06165	9	47	15	30		0.0596326	0.386762	0.633448
GOINND_07260	0	56	3	42		0.0851485	0	0.633448
GOINND_07550	23	33	20	25		0.840014	0.872407	1
GOINND_08110	10	46	14	31		0.158914	0.484946	0.676725
GOINND_09315	3	53	3	42		1	0.7943	1
GOINND_09320	15	41	14	31		0.66346	0.811811	0.918102
GOINND_09730	4	52	7	38		0.210441	0.421243	0.744023
GOMLKM_00015	4	52	9	36		0.0742139	0.311333	0.633448
GOMLKM_00160	7	49	8	37		0.575941	0.663478	0.871834
GOMLKM_00195	7	49	10	35		0.284584	0.503501	0.745426
GOMLKM_00205	5	51	9	36		0.148997	0.395864	0.676725
GOMLKM_00320	7	49	9	36		0.412201	0.574668	0.774833
GOMLKM_00365	4	52	9	36		0.0742139	0.311333	0.633448
GOMLKM_01000	2	54	3	42		0.653538	0.521931	0.905955
GOMLKM_02075	3	53	8	37		0.0583858	0.265261	0.633448
GOMLKM_02100	3	53	6	39		0.182022	0.371588	0.687576
GOMLKM_02690	1	55	0	45		1	Inf	1
GOMLKM_03280	3	53	4	41		0.696979	0.583368	0.926187
GOMLKM_04900	7	49	10	35		0.284584	0.503501	0.745426
GOMLKM_05555	3	53	9	36		0.0313187	0.229735	0.633448
GOMLKM_05710	3	53	9	36		0.0313187	0.229735	0.633448
GOMLKM_06300	7	49	10	35		0.284584	0.503501	0.745426
GOMLKM_06505	4	52	10	35		0.0418207	0.27278	0.633448
GOMLKM_07245	3	53	3	42		1	0.7943	1
GOMLKM_07365	2	54	1	44		1	1.62208	1
GOMLKM_08055	4	52	8	37		0.127306	0.35946	0.676725
GOMLKM_08420	3	53	7	38		0.105099	0.310873	0.633448
GOMLKM_08520	7	49	10	35		0.284584	0.503501	0.745426
HBLJJG_00900	4	52	10	35		0.0418207	0.27278	0.633448
HBLJJG_01060	4	52	9	36		0.0742139	0.311333	0.633448
HBLJJG_01690	3	53	8	37		0.0583858	0.265261	0.633448
HBLJJG_02280	7	49	10	35		0.284584	0.503501	0.745426
HBLJJG_02775	1	55	5	40		0.0860322	0.147934	0.633448
HBLJJG_03380	0	56	5	40		0.0154245	0	0.633448
HBLJJG_03830	4	52	9	36		0.0742139	0.311333	0.633448
HBLJJG_03980	7	49	8	37		0.575941	0.663478	0.871834
HBLJJG_04020	7	49	9	36		0.412201	0.574668	0.774833
HBLJJG_04030	7	49	10	35		0.284584	0.503501	0.745426
HBLJJG_04435	5	51	8	37		0.237018	0.457044	0.745426
HBLJJG_04490	4	52	9	36		0.0742139	0.311333	0.633448
HBLJJG_05145	3	53	7	38		0.105099	0.310873	0.633448
HBLJJG_05495	1	55	2	43		0.584158	0.394511	0.871834
HBLJJG_07240	4	52	9	36		0.0742139	0.311333	0.633448
HBLJJG_07645	4	52	9	36		0.0742139	0.311333	0.633448
HBLJJG_08370	3	53	7	38		0.105099	0.310873	0.633448
HBLJJG_08400	3	53	8	37		0.0583858	0.265261	0.633448
HBLJJG_09600	3	53	9	36		0.0313187	0.229735	0.633448
HBLJJG_09730	3	53	9	36		0.0313187	0.229735	0.633448
HCCONP_00885	4	52	10	35		0.0418207	0.27278	0.633448
HCCONP_01090	7	49	10	35		0.284584	0.503501	0.745426
HCCONP_01725	6	50	9	36		0.261704	0.483556	0.745426
HCCONP_02310	7	49	10	35		0.284584	0.503501	0.745426
HCCONP_02565	4	52	8	37		0.127306	0.35946	0.676725
HCCONP_02945	3	53	7	38		0.105099	0.310873	0.633448
HCCONP_04490	2	54	3	42		0.653538	0.521931	0.905955
HCCONP_04895	2	54	5	40		0.236983	0.299815	0.745426
HCCONP_05550	4	52	9	36		0.0742139	0.311333	0.633448
HCCONP_05595	7	49	9	36		0.412201	0.574668	0.774833
HCCONP_05710	5	51	9	36		0.148997	0.395864	0.676725
HCCONP_05720	7	49	10	35		0.284584	0.503501	0.745426
HCCONP_05755	7	49	8	37		0.575941	0.663478	0.871834
HCCONP_06205	3	53	3	42		1	0.7943	1
HCCONP_06385	1	55	1	44		1	0.801788	1
HCCONP_06930	4	52	3	42		1	1.07616	1
HCCONP_08040	3	53	9	36		0.0313187	0.229735	0.633448
HCCONP_09215	3	53	9	36		0.0313187	0.229735	0.633448
HCCONP_09320	3	53	9	36		0.0313187	0.229735	0.633448
HCOFBA_00595	4	52	0	45		0.12645	Inf	0.676725
HCOFBA_01665	8	48	3	42		0.337261	2.31503	0.745426
HCOFBA_01805	7	49	2	43		0.291966	3.04102	0.745426
HCOFBA_01810	6	50	3	42		0.727468	1.67168	0.946784
HCOFBA_02295	8	48	3	42		0.337261	2.31503	0.745426
HCOFBA_03435	8	48	3	42		0.337261	2.31503	0.745426
HCOFBA_03765	8	48	3	42		0.337261	2.31503	0.745426
HCOFBA_03770	8	48	3	42		0.337261	2.31503	0.745426
HCOFBA_03940	8	48	3	42		0.337261	2.31503	0.745426
HCOFBA_03945	3	53	0	45		0.251485	Inf	0.745426
HCOFBA_05215	11	45	4	41		0.164998	2.4841	0.676725
HCOFBA_05220	11	45	4	41		0.164998	2.4841	0.676725
HCOFBA_05250	8	48	3	42		0.337261	2.31503	0.745426
HCOFBA_06425	8	48	3	42		0.337261	2.31503	0.745426
HCOFBA_07670	8	48	3	42		0.337261	2.31503	0.745426
HCOFBA_07930	8	48	3	42		0.337261	2.31503	0.745426
HCOFBA_08155	6	50	2	43		0.293429	2.55771	0.745426
HCOFBA_08200	11	45	10	35		0.808048	0.856887	1
HCOFBA_08560	1	55	1	44		1	0.801788	1
HCOFBA_09410	3	53	3	42		1	0.7943	1
HCOFBA_09840	13	43	7	38		0.452503	1.6333	0.778506
HFLBPK_00155	25	31	22	23		0.692872	0.844541	0.925908
HFLBPK_01075	9	47	9	36		0.613226	0.768008	0.885125
HFLBPK_03315	4	52	9	36		0.0742139	0.311333	0.633448
HFLBPK_03655	5	51	1	44		0.221664	4.26175	0.745426
HFLBPK_04140	29	27	23	22		1	1.02711	1
HFLBPK_05325	3	53	5	40		0.461009	0.456415	0.778506
HFLBPK_06385	10	46	14	31		0.158914	0.484946	0.676725
HFLBPK_07975	25	31	22	23		0.692872	0.844541	0.925908
HFLBPK_08155	18	38	18	27		0.531005	0.712971	0.832785
HFLBPK_08160	8	48	10	35		0.311425	0.586521	0.745426
HFLBPK_08600	0	56	1	44		0.445545	0	0.778506
HFLBPK_09845	2	54	5	40		0.236983	0.299815	0.745426
HFLBPK_10010	13	43	15	30		0.273419	0.607739	0.745426
HFLBPK_10125	12	44	15	30		0.257912	0.548796	0.745426
HFLBPK_10635	6	50	6	39		0.762303	0.781944	0.971691
HJFKMO_00130	9	47	11	34		0.324177	0.595025	0.745426
HJFKMO_03350	0	56	1	44		0.445545	0	0.778506
HJFKMO_03525	10	46	14	31		0.158914	0.484946	0.676725
HJFKMO_04200	11	45	14	31		0.246655	0.544628	0.745426
HJFKMO_05070	10	46	8	37		1	1.00538	1
HJFKMO_05440	5	51	3	42		0.729215	1.36833	0.946784
HJFKMO_06100	18	38	17	28		0.674465	0.782126	0.925908
HJFKMO_06405	16	40	12	33		1	1.09896	1
HJFKMO_06930	7	49	6	39		1	0.929255	1
HJFKMO_06935	0	56	1	44		0.445545	0	0.778506
HJFKMO_07015	16	40	16	29		0.521202	0.727346	0.82175
HJFKMO_07275	4	52	5	40		0.506847	0.618397	0.802311
HJFKMO_08675	0	56	1	44		0.445545	0	0.778506
HJFKMO_08770	11	45	13	32		0.348593	0.604811	0.75987
HJFKMO_08870	8	48	10	35		0.311425	0.586521	0.745426
HJFKMO_08995	1	55	5	40		0.0860322	0.147934	0.633448
HJFKMO_09485	1	55	2	43		0.584158	0.394511	0.871834
HJFKMO_09855	8	48	3	42		0.337261	2.31503	0.745426
HJFKMO_09860	1	55	1	44		1	0.801788	1
HNAOOL_00870	4	52	10	35		0.0418207	0.27278	0.633448
HNAOOL_01085	7	49	9	36		0.412201	0.574668	0.774833
HNAOOL_02290	4	52	8	37		0.127306	0.35946	0.676725
HNAOOL_02715	3	53	7	38		0.105099	0.310873	0.633448
HNAOOL_04435	3	53	8	37		0.0583858	0.265261	0.633448
HNAOOL_05305	4	52	9	36		0.0742139	0.311333	0.633448
HNAOOL_05350	3	53	8	37		0.0583858	0.265261	0.633448
HNAOOL_05475	7	49	10	35		0.284584	0.503501	0.745426
HNAOOL_05485	4	52	9	36		0.0742139	0.311333	0.633448
HNAOOL_05525	7	49	8	37		0.575941	0.663478	0.871834
HNAOOL_05970	3	53	3	42		1	0.7943	1
HNAOOL_06725	3	53	4	41		0.696979	0.583368	0.926187
HNAOOL_07180	6	50	7	38		0.555876	0.654246	0.860991
HNAOOL_07745	7	49	10	35		0.284584	0.503501	0.745426
HNAOOL_07995	3	53	7	38		0.105099	0.310873	0.633448
HNAOOL_08020	1	55	0	45		1	Inf	1
HNAOOL_09225	3	53	9	36		0.0313187	0.229735	0.633448
HNAOOL_09335	4	52	1	44		0.377652	3.34922	0.772276
HNHNDD_00905	32	24	22	23		0.429397	1.38931	0.778506
HNHNDD_01315	7	49	12	33		0.0794069	0.396601	0.633448
HNHNDD_01415	5	51	1	44		0.221664	4.26175	0.745426
HNHNDD_01995	5	51	2	43		0.456849	2.09322	0.778506
HNHNDD_02065	7	49	2	43		0.291966	3.04102	0.745426
HNHNDD_02155	22	34	18	27		1	0.970862	1
HNHNDD_02500	7	49	4	41		0.750418	1.45888	0.963259
HNHNDD_03725	6	50	2	43		0.293429	2.55771	0.745426
HNHNDD_03730	13	43	6	39		0.305805	1.95236	0.745426
HNHNDD_03895	25	31	22	23		0.692872	0.844541	0.925908
HNHNDD_04470	5	51	2	43		0.456849	2.09322	0.778506
HNHNDD_05085	6	50	3	42		0.727468	1.67168	0.946784
HNHNDD_06505	8	48	9	36		0.593689	0.669396	0.879979
HNHNDD_07520	10	46	6	39		0.593555	1.40828	0.879979
HNHNDD_09090	7	49	11	34		0.18998	0.445222	0.698336
HNHNDD_09550	3	53	0	45		0.251485	Inf	0.745426
HNHNDD_09760	7	49	3	42		0.505296	1.98697	0.801457
HOOHFL_00410	0	56	1	44		0.445545	0	0.778506
HOOHFL_01510	17	39	17	28		0.526115	0.720344	0.827848
HOOHFL_03240	11	45	14	31		0.246655	0.544628	0.745426
HOOHFL_03655	8	48	14	31		0.0534637	0.372827	0.633448
HOOHFL_03890	25	31	22	23		0.692872	0.844541	0.925908
HOOHFL_04040	9	47	9	36		0.613226	0.768008	0.885125
HOOHFL_04045	9	47	14	31		0.0956874	0.427733	0.633448
HOOHFL_04660	0	56	1	44		0.445545	0	0.778506
HOOHFL_04825	7	49	4	41		0.750418	1.45888	0.963259
HOOHFL_05555	4	52	8	37		0.127306	0.35946	0.676725
HOOHFL_06320	12	44	15	30		0.257912	0.548796	0.745426
HOOHFL_06395	1	55	3	42		0.321075	0.257842	0.745426
HOOHFL_07525	10	46	14	31		0.158914	0.484946	0.676725
HOOHFL_08580	32	24	22	23		0.429397	1.38931	0.778506
HOOHFL_08990	5	51	2	43		0.456849	2.09322	0.778506
HOOHFL_09335	14	42	16	29		0.278975	0.607258	0.745426
IANIOK_00220	7	49	7	38		0.774453	0.777488	0.985592
IANIOK_00415	3	53	4	41		0.696979	0.583368	0.926187
IANIOK_00420	1	55	4	41		0.168988	0.189235	0.676725
IANIOK_00580	25	31	22	23		0.692872	0.844541	0.925908
IANIOK_01140	13	43	15	30		0.273419	0.607739	0.745426
IANIOK_01640	0	56	1	44		0.445545	0	0.778506
IANIOK_02325	1	55	4	41		0.168988	0.189235	0.676725
IANIOK_02585	32	24	22	23		0.429397	1.38931	0.778506
IANIOK_03495	16	40	12	33		1	1.09896	1
IANIOK_04035	14	42	14	31		0.511413	0.74035	0.809
IANIOK_05360	12	44	15	30		0.257912	0.548796	0.745426
IANIOK_05445	5	51	6	39		0.533012	0.640152	0.833182
IANIOK_06095	11	45	13	32		0.348593	0.604811	0.75987
IANIOK_06880	8	48	14	31		0.0534637	0.372827	0.633448
IANIOK_06965	24	32	21	24		0.84056	0.858458	1
IANIOK_07595	0	56	3	42		0.0851485	0	0.633448
IANIOK_09440	4	52	8	37		0.127306	0.35946	0.676725
IBFBPF_00860	15	41	10	35		0.648535	1.27737	0.905955
IBFBPF_01470	5	51	4	41		1	1.00485	1
IBFBPF_01775	9	47	3	42		0.217489	2.65674	0.745426
IBFBPF_01780	7	49	3	42		0.505296	1.98697	0.801457
IBFBPF_01950	8	48	3	42		0.337261	2.31503	0.745426
IBFBPF_02280	7	49	3	42		0.505296	1.98697	0.801457
IBFBPF_03590	8	48	3	42		0.337261	2.31503	0.745426
IBFBPF_03705	8	48	3	42		0.337261	2.31503	0.745426
IBFBPF_03710	6	50	3	42		0.727468	1.67168	0.946784
IBFBPF_04275	4	52	1	44		0.377652	3.34922	0.772276
IBFBPF_05695	0	56	1	44		0.445545	0	0.778506
IBFBPF_06285	8	48	3	42		0.337261	2.31503	0.745426
IBFBPF_06680	3	53	1	44		0.626591	2.47015	0.885125
IBFBPF_07185	5	51	4	41		1	1.00485	1
IBFBPF_07220	8	48	3	42		0.337261	2.31503	0.745426
IBFBPF_07665	11	45	10	35		0.808048	0.856887	1
IBFBPF_07855	0	56	1	44		0.445545	0	0.778506
IBFBPF_07895	8	48	3	42		0.337261	2.31503	0.745426
IBFBPF_08725	8	48	3	42		0.337261	2.31503	0.745426
IBFBPF_09135	2	54	1	44		1	1.62208	1
IBFBPF_09150	8	48	3	42		0.337261	2.31503	0.745426
IBFBPF_10095	11	45	4	41		0.164998	2.4841	0.676725
IBFBPF_10100	11	45	4	41		0.164998	2.4841	0.676725
ICLAPH_02260	5	51	3	42		0.729215	1.36833	0.946784
ICLAPH_02565	0	56	2	43		0.19604	0	0.698336
ICLAPH_05230	4	52	5	40		0.506847	0.618397	0.802311
ICLAPH_05360	0	56	2	43		0.19604	0	0.698336
ICLAPH_05935	11	45	10	35		0.808048	0.856887	1
ICLAPH_07010	0	56	1	44		0.445545	0	0.778506
ICLAPH_08285	0	56	2	43		0.19604	0	0.698336
ICLAPH_08445	0	56	2	43		0.19604	0	0.698336
ICLAPH_08480	0	56	1	44		0.445545	0	0.778506
ICLAPH_08925	0	56	2	43		0.19604	0	0.698336
ICLAPH_09405	0	56	2	43		0.19604	0	0.698336
ICLAPH_10120	0	56	2	43		0.19604	0	0.698336
ICLAPH_10315	0	56	2	43		0.19604	0	0.698336
ICLAPH_10480	3	53	7	38		0.105099	0.310873	0.633448
ICLAPH_10485	0	56	2	43		0.19604	0	0.698336
ICLAPH_10500	3	53	7	38		0.105099	0.310873	0.633448
ICLAPH_10980	3	53	7	38		0.105099	0.310873	0.633448
ICLAPH_11745	0	56	1	44		0.445545	0	0.778506
ICLAPH_11755	0	56	1	44		0.445545	0	0.778506
IDLAKN_00130	4	52	9	36		0.0742139	0.311333	0.633448
IDLAKN_00535	4	52	9	36		0.0742139	0.311333	0.633448
IDLAKN_01290	1	55	5	40		0.0860322	0.147934	0.633448
IDLAKN_01895	0	56	5	40		0.0154245	0	0.633448
IDLAKN_02630	7	49	10	35		0.284584	0.503501	0.745426
IDLAKN_03210	7	49	10	35		0.284584	0.503501	0.745426
IDLAKN_04880	3	53	9	36		0.0313187	0.229735	0.633448
IDLAKN_05525	3	53	7	38		0.105099	0.310873	0.633448
IDLAKN_05555	3	53	8	37		0.0583858	0.265261	0.633448
IDLAKN_06670	3	53	7	38		0.105099	0.310873	0.633448
IDLAKN_07110	4	52	10	35		0.0418207	0.27278	0.633448
IDLAKN_07270	7	49	10	35		0.284584	0.503501	0.745426
IDLAKN_07955	3	53	9	36		0.0313187	0.229735	0.633448
IDLAKN_08360	7	49	8	37		0.575941	0.663478	0.871834
IDLAKN_08400	7	49	9	36		0.412201	0.574668	0.774833
IDLAKN_08410	7	49	10	35		0.284584	0.503501	0.745426
IDLAKN_08530	7	49	10	35		0.284584	0.503501	0.745426
IDLAKN_08585	4	52	9	36		0.0742139	0.311333	0.633448
IDLAKN_09005	4	52	9	36		0.0742139	0.311333	0.633448
IGEJPM_00830	2	54	1	44		1	1.62208	1
IGEJPM_01085	15	41	12	33		1	1.00604	1
IGEJPM_01630	1	55	0	45		1	Inf	1
IGEJPM_01730	7	49	2	43		0.291966	3.04102	0.745426
IGEJPM_01800	7	49	4	41		0.750418	1.45888	0.963259
IGEJPM_02405	2	54	0	45		0.50099	Inf	0.801457
IGEJPM_02505	5	51	4	41		1	1.00485	1
IGEJPM_04575	1	55	0	45		1	Inf	1
IGEJPM_04735	7	49	5	40		1	1.14136	1
IGEJPM_04740	7	49	2	43		0.291966	3.04102	0.745426
IGEJPM_05940	7	49	3	42		0.505296	1.98697	0.801457
IGEJPM_07055	3	53	1	44		0.626591	2.47015	0.885125
IGEJPM_07155	2	54	1	44		1	1.62208	1
IGEJPM_07195	2	54	1	44		1	1.62208	1
IGEJPM_07770	4	52	3	42		1	1.07616	1
IGEJPM_07890	7	49	2	43		0.291966	3.04102	0.745426
IGEJPM_09560	5	51	2	43		0.456849	2.09322	0.778506
IGKMML_00005	1	55	2	43		0.584158	0.394511	0.871834
IGKMML_00010	25	31	22	23		0.692872	0.844541	0.925908
IGKMML_00120	9	47	5	40		0.56929	1.52559	0.871834
IGKMML_00995	7	49	5	40		1	1.14136	1
IGKMML_01790	3	53	2	43		1	1.21464	1
IGKMML_02000	6	50	4	41		1	1.22751	1
IGKMML_02280	7	49	5	40		1	1.14136	1
IGKMML_02885	22	34	20	25		0.685878	0.810537	0.925908
IGKMML_03705	7	49	5	40		1	1.14136	1
IGKMML_03835	6	50	5	40		1	0.960368	1
IGKMML_04090	2	54	2	43		1	0.798113	1
IGKMML_04340	3	53	2	43		1	1.21464	1
IGKMML_06340	7	49	5	40		1	1.14136	1
IGKMML_07270	4	52	2	43		0.689628	1.64593	0.925908
IGKMML_07655	3	53	2	43		1	1.21464	1
IGKMML_08255	32	24	22	23		0.429397	1.38931	0.778506
IHHFKC_00935	4	52	1	44		0.377652	3.34922	0.772276
IHHFKC_01275	6	50	3	42		0.727468	1.67168	0.946784
IHHFKC_01570	8	48	5	40		0.768535	1.32959	0.978584
IHHFKC_01645	3	53	3	42		1	0.7943	1
IHHFKC_01650	15	41	9	36		0.486235	1.45795	0.801457
IHHFKC_01745	5	51	4	41		1	1.00485	1
IHHFKC_02395	4	52	4	41		1	0.79034	1
IHHFKC_03250	6	50	5	40		1	0.960368	1
IHHFKC_03440	2	54	2	43		1	0.798113	1
IHHFKC_04130	3	53	3	42		1	0.7943	1
IHHFKC_04295	7	49	5	40		1	1.14136	1
IHHFKC_05150	1	55	2	43		0.584158	0.394511	0.871834
IHHFKC_05455	32	24	22	23		0.429397	1.38931	0.778506
IHHFKC_06795	5	51	5	40		0.748204	0.786224	0.963259
IHHFKC_07455	2	54	2	43		1	0.798113	1
IHHFKC_08070	28	28	22	23		1	1.04502	1
INHKBF_00425	11	45	14	31		0.246655	0.544628	0.745426
INHKBF_00525	5	51	6	39		0.533012	0.640152	0.833182
INHKBF_00610	4	52	2	43		0.689628	1.64593	0.925908
INHKBF_01935	5	51	2	43		0.456849	2.09322	0.778506
INHKBF_02935	4	52	0	45		0.12645	Inf	0.676725
INHKBF_03085	9	47	8	37		1	0.88671	1
INHKBF_03090	9	47	14	31		0.0956874	0.427733	0.633448
INHKBF_03170	22	34	16	29		0.836572	1.17094	1
INHKBF_03700	28	28	23	22		1	0.956918	1
INHKBF_04050	11	45	13	32		0.348593	0.604811	0.75987
INHKBF_04650	9	47	8	37		1	0.88671	1
INHKBF_05910	10	46	14	31		0.158914	0.484946	0.676725
INHKBF_06075	2	54	0	45		0.50099	Inf	0.801457
INHKBF_06595	11	45	8	37		1	1.12919	1
INHKBF_08710	10	46	5	40		0.40792	1.72988	0.774833
IPNEFN_00655	0	56	1	44		0.445545	0	0.778506
IPNEFN_01165	4	52	4	41		1	0.79034	1
IPNEFN_01340	0	56	2	43		0.19604	0	0.698336
IPNEFN_01490	0	56	1	44		0.445545	0	0.778506
IPNEFN_01545	0	56	2	43		0.19604	0	0.698336
IPNEFN_02140	0	56	2	43		0.19604	0	0.698336
IPNEFN_03630	0	56	2	43		0.19604	0	0.698336
IPNEFN_03935	1	55	2	43		0.584158	0.394511	0.871834
IPNEFN_04400	0	56	2	43		0.19604	0	0.698336
IPNEFN_05475	3	53	5	40		0.461009	0.456415	0.778506
IPNEFN_05705	0	56	1	44		0.445545	0	0.778506
IPNEFN_05970	0	56	2	43		0.19604	0	0.698336
IPNEFN_06145	32	24	22	23		0.429397	1.38931	0.778506
IPNEFN_06555	3	53	7	38		0.105099	0.310873	0.633448
IPNEFN_06570	0	56	2	43		0.19604	0	0.698336
IPNEFN_06575	3	53	7	38		0.105099	0.310873	0.633448
IPNEFN_07575	0	56	1	44		0.445545	0	0.778506
IPNEFN_08300	0	56	2	43		0.19604	0	0.698336
IPNEFN_08875	4	52	7	38		0.210441	0.421243	0.744023
IPNEFN_09075	0	56	2	43		0.19604	0	0.698336
IPNEFN_11790	0	56	1	44		0.445545	0	0.778506
JBPMHL_00490	13	43	7	38		0.452503	1.6333	0.778506
JBPMHL_00825	8	48	7	38		1	0.905663	1
JBPMHL_01160	11	45	14	31		0.246655	0.544628	0.745426
JBPMHL_01545	10	46	8	37		1	1.00538	1
JBPMHL_01935	2	54	0	45		0.50099	Inf	0.801457
JBPMHL_03295	8	48	3	42		0.337261	2.31503	0.745426
JBPMHL_04105	12	44	14	31		0.360183	0.606988	0.772276
JBPMHL_04225	7	49	8	37		0.575941	0.663478	0.871834
JBPMHL_04320	9	47	10	35		0.454074	0.672921	0.778506
JBPMHL_06245	2	54	2	43		1	0.798113	1
JBPMHL_06320	10	46	14	31		0.158914	0.484946	0.676725
JBPMHL_08045	18	38	18	27		0.531005	0.712971	0.832785
JBPMHL_08050	14	42	15	30		0.383877	0.669399	0.772276
JBPMHL_08170	14	42	16	29		0.278975	0.607258	0.745426
JCKFJM_00720	5	51	3	42		0.729215	1.36833	0.946784
JCKFJM_00970	2	54	0	45		0.50099	Inf	0.801457
JCKFJM_01360	11	45	8	37		1	1.12919	1
JCKFJM_01745	11	45	14	31		0.246655	0.544628	0.745426
JCKFJM_02075	10	46	10	35		0.62247	0.762958	0.885125
JCKFJM_02410	14	42	10	35		0.816672	1.16489	1
JCKFJM_03295	8	48	3	42		0.337261	2.31503	0.745426
JCKFJM_03575	6	50	6	39		0.762303	0.781944	0.971691
JCKFJM_04095	12	44	15	30		0.257912	0.548796	0.745426
JCKFJM_04215	10	46	12	33		0.336585	0.600946	0.745426
JCKFJM_04310	9	47	10	35		0.454074	0.672921	0.778506
JCKFJM_06285	10	46	14	31		0.158914	0.484946	0.676725
JCKFJM_06960	2	54	2	43		1	0.798113	1
JCKFJM_07020	10	46	13	32		0.235126	0.538499	0.745426
JCKFJM_07140	9	47	13	32		0.148656	0.474963	0.676725
JCKFJM_07145	23	33	20	25		0.840014	0.872407	1
JCOICH_00505	2	54	4	41		0.402714	0.383263	0.772276
JCOICH_00955	8	48	8	37		0.785021	0.772847	0.993189
JCOICH_01725	2	54	4	41		0.402714	0.383263	0.772276
JCOICH_02525	2	54	4	41		0.402714	0.383263	0.772276
JCOICH_02560	2	54	4	41		0.402714	0.383263	0.772276
JCOICH_03580	2	54	4	41		0.402714	0.383263	0.772276
JCOICH_04410	5	51	4	41		1	1.00485	1
JCOICH_05310	3	53	7	38		0.105099	0.310873	0.633448
JCOICH_05325	3	53	5	40		0.461009	0.456415	0.778506
JCOICH_05330	3	53	7	38		0.105099	0.310873	0.633448
JCOICH_05510	2	54	3	42		0.653538	0.521931	0.905955
JCOICH_06170	2	54	4	41		0.402714	0.383263	0.772276
JCOICH_06435	2	54	4	41		0.402714	0.383263	0.772276
JCOICH_07075	2	54	4	41		0.402714	0.383263	0.772276
JCOICH_08180	11	45	10	35		0.808048	0.856887	1
JCOICH_09235	2	54	4	41		0.402714	0.383263	0.772276
JCOICH_09255	2	54	0	45		0.50099	Inf	0.801457
JCOICH_10040	3	53	7	38		0.105099	0.310873	0.633448
JDEAHB_01100	22	34	18	27		1	0.970862	1
JDEAHB_01180	9	47	14	31		0.0956874	0.427733	0.633448
JDEAHB_01185	11	45	10	35		0.808048	0.856887	1
JDEAHB_01335	4	52	0	45		0.12645	Inf	0.676725
JDEAHB_02330	5	51	2	43		0.456849	2.09322	0.778506
JDEAHB_02845	11	45	10	35		0.808048	0.856887	1
JDEAHB_03255	10	46	8	37		1	1.00538	1
JDEAHB_03860	11	45	13	32		0.348593	0.604811	0.75987
JDEAHB_04210	28	28	23	22		1	0.956918	1
JDEAHB_04940	11	45	14	31		0.246655	0.544628	0.745426
JDEAHB_05040	5	51	7	38		0.362904	0.535583	0.772276
JDEAHB_05125	10	46	6	39		0.593555	1.40828	0.879979
JDEAHB_06395	10	46	14	31		0.158914	0.484946	0.676725
JDEAHB_06560	2	54	0	45		0.50099	Inf	0.801457
JDEAHB_08625	10	46	5	40		0.40792	1.72988	0.774833
JEJLFF_00965	8	48	2	43		0.178295	3.54374	0.676725
JEJLFF_01165	8	48	2	43		0.178295	3.54374	0.676725
JEJLFF_01800	8	48	2	43		0.178295	3.54374	0.676725
JEJLFF_03730	8	48	2	43		0.178295	3.54374	0.676725
JEJLFF_04360	3	53	0	45		0.251485	Inf	0.745426
JEJLFF_04990	8	48	2	43		0.178295	3.54374	0.676725
JEJLFF_04995	8	48	2	43		0.178295	3.54374	0.676725
JEJLFF_05305	7	49	0	45		0.0161223	Inf	0.633448
JEJLFF_05310	8	48	2	43		0.178295	3.54374	0.676725
JEJLFF_06420	8	48	2	43		0.178295	3.54374	0.676725
JEJLFF_06885	7	49	0	45		0.0161223	Inf	0.633448
JEJLFF_06950	32	24	22	23		0.429397	1.38931	0.778506
JEJLFF_07360	8	48	2	43		0.178295	3.54374	0.676725
JEJLFF_07595	7	49	0	45		0.0161223	Inf	0.633448
JEJLFF_07645	3	53	0	45		0.251485	Inf	0.745426
JEJLFF_07655	4	52	0	45		0.12645	Inf	0.676725
JEJLFF_08110	7	49	0	45		0.0161223	Inf	0.633448
JEJLFF_09575	8	48	2	43		0.178295	3.54374	0.676725
JEJLFF_09825	7	49	0	45		0.0161223	Inf	0.633448
JEJPFJ_00900	4	52	10	35		0.0418207	0.27278	0.633448
JEJPFJ_01060	4	52	9	36		0.0742139	0.311333	0.633448
JEJPFJ_01690	3	53	8	37		0.0583858	0.265261	0.633448
JEJPFJ_02280	7	49	10	35		0.284584	0.503501	0.745426
JEJPFJ_02775	1	55	5	40		0.0860322	0.147934	0.633448
JEJPFJ_03380	0	56	5	40		0.0154245	0	0.633448
JEJPFJ_03830	4	52	9	36		0.0742139	0.311333	0.633448
JEJPFJ_03980	7	49	8	37		0.575941	0.663478	0.871834
JEJPFJ_04020	7	49	9	36		0.412201	0.574668	0.774833
JEJPFJ_04030	7	49	10	35		0.284584	0.503501	0.745426
JEJPFJ_04435	6	50	9	36		0.261704	0.483556	0.745426
JEJPFJ_04490	4	52	9	36		0.0742139	0.311333	0.633448
JEJPFJ_05145	3	53	7	38		0.105099	0.310873	0.633448
JEJPFJ_06980	4	52	9	36		0.0742139	0.311333	0.633448
JEJPFJ_07385	4	52	9	36		0.0742139	0.311333	0.633448
JEJPFJ_08110	3	53	7	38		0.105099	0.310873	0.633448
JEJPFJ_08140	3	53	8	37		0.0583858	0.265261	0.633448
JEJPFJ_09340	3	53	9	36		0.0313187	0.229735	0.633448
JEJPFJ_09470	3	53	9	36		0.0313187	0.229735	0.633448
JNNIEM_00225	8	48	3	42		0.337261	2.31503	0.745426
JNNIEM_00255	11	45	4	41		0.164998	2.4841	0.676725
JNNIEM_00260	11	45	4	41		0.164998	2.4841	0.676725
JNNIEM_01185	5	51	3	42		0.729215	1.36833	0.946784
JNNIEM_01190	6	50	3	42		0.727468	1.67168	0.946784
JNNIEM_01370	8	48	3	42		0.337261	2.31503	0.745426
JNNIEM_01690	8	48	3	42		0.337261	2.31503	0.745426
JNNIEM_02105	11	45	10	35		0.808048	0.856887	1
JNNIEM_02150	6	50	2	43		0.293429	2.55771	0.745426
JNNIEM_02340	8	48	3	42		0.337261	2.31503	0.745426
JNNIEM_02605	8	48	3	42		0.337261	2.31503	0.745426
JNNIEM_03930	4	52	1	44		0.377652	3.34922	0.772276
JNNIEM_04860	15	41	8	37		0.343937	1.6834	0.75877
JNNIEM_05285	8	48	3	42		0.337261	2.31503	0.745426
JNNIEM_06475	3	53	3	42		1	0.7943	1
JNNIEM_07370	8	48	3	42		0.337261	2.31503	0.745426
JNNIEM_08720	7	49	5	40		1	1.14136	1
JNNIEM_09925	6	50	3	42		0.727468	1.67168	0.946784
JNNIEM_09930	7	49	3	42		0.505296	1.98697	0.801457
JNNIEM_10175	8	48	3	42		0.337261	2.31503	0.745426
JNNIEM_10250	1	55	0	45		1	Inf	1
JOEECB_00290	2	54	4	41		0.402714	0.383263	0.772276
JOEECB_00325	2	54	4	41		0.402714	0.383263	0.772276
JOEECB_01130	2	54	4	41		0.402714	0.383263	0.772276
JOEECB_01900	6	50	8	37		0.388852	0.558307	0.772276
JOEECB_02350	2	54	4	41		0.402714	0.383263	0.772276
JOEECB_03215	5	51	4	41		1	1.00485	1
JOEECB_04045	2	54	4	41		0.402714	0.383263	0.772276
JOEECB_04705	2	54	4	41		0.402714	0.383263	0.772276
JOEECB_05365	2	54	3	42		0.653538	0.521931	0.905955
JOEECB_05545	3	53	7	38		0.105099	0.310873	0.633448
JOEECB_05550	3	53	5	40		0.461009	0.456415	0.778506
JOEECB_05565	3	53	7	38		0.105099	0.310873	0.633448
JOEECB_06470	11	45	10	35		0.808048	0.856887	1
JOEECB_07420	2	54	4	41		0.402714	0.383263	0.772276
JOEECB_07440	2	54	0	45		0.50099	Inf	0.801457
JOEECB_07975	2	54	4	41		0.402714	0.383263	0.772276
JOEECB_08910	2	54	4	41		0.402714	0.383263	0.772276
JOEECB_09925	3	53	7	38		0.105099	0.310873	0.633448
JOHEAJ_00540	4	52	2	43		0.689628	1.64593	0.925908
JOHEAJ_01680	8	48	3	42		0.337261	2.31503	0.745426
JOHEAJ_01765	2	54	0	45		0.50099	Inf	0.801457
JOHEAJ_01855	6	50	3	42		0.727468	1.67168	0.946784
JOHEAJ_01860	6	50	3	42		0.727468	1.67168	0.946784
JOHEAJ_02325	8	48	3	42		0.337261	2.31503	0.745426
JOHEAJ_03485	7	49	3	42		0.505296	1.98697	0.801457
JOHEAJ_03895	8	48	3	42		0.337261	2.31503	0.745426
JOHEAJ_04330	9	47	1	44		0.0396248	8.2905	0.633448
JOHEAJ_04335	8	48	3	42		0.337261	2.31503	0.745426
JOHEAJ_05985	11	45	4	41		0.164998	2.4841	0.676725
JOHEAJ_05990	11	45	4	41		0.164998	2.4841	0.676725
JOHEAJ_06020	8	48	3	42		0.337261	2.31503	0.745426
JOHEAJ_06975	8	48	3	42		0.337261	2.31503	0.745426
JOHEAJ_08125	8	48	3	42		0.337261	2.31503	0.745426
JOHEAJ_08375	8	48	3	42		0.337261	2.31503	0.745426
JOHEAJ_08605	8	48	3	42		0.337261	2.31503	0.745426
JOHEAJ_10225	15	41	9	36		0.486235	1.45795	0.801457
JPPCCD_00090	8	48	3	42		0.337261	2.31503	0.745426
JPPCCD_00525	3	53	0	45		0.251485	Inf	0.745426
JPPCCD_02090	8	48	3	42		0.337261	2.31503	0.745426
JPPCCD_02845	6	50	3	42		0.727468	1.67168	0.946784
JPPCCD_02850	6	50	3	42		0.727468	1.67168	0.946784
JPPCCD_03030	7	49	1	44		0.0723103	6.1957	0.633448
JPPCCD_04610	1	55	0	45		1	Inf	1
JPPCCD_06355	2	54	0	45		0.50099	Inf	0.801457
JPPCCD_06885	7	49	5	40		1	1.14136	1
JPPCCD_08545	1	55	0	45		1	Inf	1
JPPCCD_08610	6	50	2	43		0.293429	2.55771	0.745426
JPPCCD_08840	8	48	3	42		0.337261	2.31503	0.745426
JPPCCD_09205	8	48	3	42		0.337261	2.31503	0.745426
JPPCCD_10850	8	48	3	42		0.337261	2.31503	0.745426
JPPCCD_12190	8	48	3	42		0.337261	2.31503	0.745426
JPPCCD_12225	11	45	4	41		0.164998	2.4841	0.676725
JPPCCD_12230	9	47	3	42		0.217489	2.65674	0.745426
JPPCCD_13410	8	48	3	42		0.337261	2.31503	0.745426
JPPCCD_13415	8	48	3	42		0.337261	2.31503	0.745426
KBBBKI_00480	2	54	4	41		0.402714	0.383263	0.772276
KBBBKI_01310	5	51	4	41		1	1.00485	1
KBBBKI_01765	2	54	0	45		0.50099	Inf	0.801457
KBBBKI_01785	2	54	4	41		0.402714	0.383263	0.772276
KBBBKI_02905	2	54	4	41		0.402714	0.383263	0.772276
KBBBKI_03675	6	50	8	37		0.388852	0.558307	0.772276
KBBBKI_04125	2	54	4	41		0.402714	0.383263	0.772276
KBBBKI_04810	2	54	4	41		0.402714	0.383263	0.772276
KBBBKI_05470	2	54	3	42		0.653538	0.521931	0.905955
KBBBKI_05650	3	53	7	38		0.105099	0.310873	0.633448
KBBBKI_05655	3	53	5	40		0.461009	0.456415	0.778506
KBBBKI_05670	3	53	7	38		0.105099	0.310873	0.633448
KBBBKI_06665	2	54	4	41		0.402714	0.383263	0.772276
KBBBKI_07305	2	54	4	41		0.402714	0.383263	0.772276
KBBBKI_07755	11	45	10	35		0.808048	0.856887	1
KBBBKI_08775	2	54	4	41		0.402714	0.383263	0.772276
KBBBKI_08810	2	54	4	41		0.402714	0.383263	0.772276
KBBBKI_10040	3	53	7	38		0.105099	0.310873	0.633448
KDDCMK_00890	4	52	10	35		0.0418207	0.27278	0.633448
KDDCMK_01050	4	52	9	36		0.0742139	0.311333	0.633448
KDDCMK_01680	7	49	10	35		0.284584	0.503501	0.745426
KDDCMK_02270	7	49	10	35		0.284584	0.503501	0.745426
KDDCMK_02765	1	55	5	40		0.0860322	0.147934	0.633448
KDDCMK_03370	0	56	5	40		0.0154245	0	0.633448
KDDCMK_03805	4	52	9	36		0.0742139	0.311333	0.633448
KDDCMK_03950	7	49	8	37		0.575941	0.663478	0.871834
KDDCMK_03990	7	49	9	36		0.412201	0.574668	0.774833
KDDCMK_04000	7	49	10	35		0.284584	0.503501	0.745426
KDDCMK_04405	6	50	10	35		0.16993	0.423692	0.676725
KDDCMK_04460	4	52	9	36		0.0742139	0.311333	0.633448
KDDCMK_05125	3	53	7	38		0.105099	0.310873	0.633448
KDDCMK_06960	4	52	9	36		0.0742139	0.311333	0.633448
KDDCMK_07365	4	52	9	36		0.0742139	0.311333	0.633448
KDDCMK_08090	3	53	7	38		0.105099	0.310873	0.633448
KDDCMK_08120	3	53	8	37		0.0583858	0.265261	0.633448
KDDCMK_09325	3	53	9	36		0.0313187	0.229735	0.633448
KDDCMK_09455	3	53	9	36		0.0313187	0.229735	0.633448
KINNJL_00040	5	51	13	32		0.0168102	0.244842	0.633448
KINNJL_00770	3	53	9	36		0.0313187	0.229735	0.633448
KINNJL_01665	5	51	4	41		1	1.00485	1
KINNJL_01715	7	49	6	39		1	0.929255	1
KINNJL_02275	11	45	15	30		0.169098	0.492449	0.676725
KINNJL_02365	10	46	10	35		0.62247	0.762958	0.885125
KINNJL_02865	28	28	15	30		0.108182	1.98618	0.647458
KINNJL_02900	8	48	8	37		0.785021	0.772847	0.993189
KINNJL_03770	10	46	14	31		0.158914	0.484946	0.676725
KINNJL_03775	5	51	10	35		0.0904307	0.346852	0.633448
KINNJL_04000	22	34	19	26		0.839507	0.88652	1
KINNJL_04530	1	55	5	40		0.0860322	0.147934	0.633448
KINNJL_04595	10	46	8	37		1	1.00538	1
KINNJL_05440	0	56	4	41		0.0364922	0	0.633448
KINNJL_06660	10	46	14	31		0.158914	0.484946	0.676725
KINNJL_06890	5	51	10	35		0.0904307	0.346852	0.633448
KINNJL_07270	0	56	3	42		0.0851485	0	0.633448
KINNJL_07630	8	48	11	34		0.21137	0.518604	0.744023
KINNJL_09650	4	52	9	36		0.0742139	0.311333	0.633448
KPJBNI_00185	1	55	0	45		1	Inf	1
KPJBNI_00215	1	55	0	45		1	Inf	1
KPJBNI_00265	8	48	2	43		0.178295	3.54374	0.676725
KPJBNI_00515	8	48	2	43		0.178295	3.54374	0.676725
KPJBNI_00925	7	49	0	45		0.0161223	Inf	0.633448
KPJBNI_01350	8	48	2	43		0.178295	3.54374	0.676725
KPJBNI_02520	8	48	2	43		0.178295	3.54374	0.676725
KPJBNI_02525	7	49	0	45		0.0161223	Inf	0.633448
KPJBNI_02795	8	48	2	43		0.178295	3.54374	0.676725
KPJBNI_02800	8	48	2	43		0.178295	3.54374	0.676725
KPJBNI_03970	7	49	0	45		0.0161223	Inf	0.633448
KPJBNI_04865	8	48	2	43		0.178295	3.54374	0.676725
KPJBNI_05115	7	49	0	45		0.0161223	Inf	0.633448
KPJBNI_05935	8	48	2	43		0.178295	3.54374	0.676725
KPJBNI_06640	8	48	2	43		0.178295	3.54374	0.676725
KPJBNI_08615	8	48	2	43		0.178295	3.54374	0.676725
KPJBNI_09470	8	48	2	43		0.178295	3.54374	0.676725
LDONIE_00050	4	52	9	36		0.0742139	0.311333	0.633448
LDONIE_00480	0	56	1	44		0.445545	0	0.778506
LDONIE_00960	4	52	9	36		0.0742139	0.311333	0.633448
LDONIE_01240	2	54	3	42		0.653538	0.521931	0.905955
LDONIE_01855	4	52	9	36		0.0742139	0.311333	0.633448
LDONIE_01910	7	49	5	40		1	1.14136	1
LDONIE_02015	4	52	9	36		0.0742139	0.311333	0.633448
LDONIE_02020	7	49	9	36		0.412201	0.574668	0.774833
LDONIE_02060	6	50	7	38		0.555876	0.654246	0.860991
LDONIE_02125	1	55	2	43		0.584158	0.394511	0.871834
LDONIE_04105	7	49	10	35		0.284584	0.503501	0.745426
LDONIE_04345	7	49	10	35		0.284584	0.503501	0.745426
LDONIE_04980	3	53	4	41		0.696979	0.583368	0.926187
LDONIE_06225	7	49	10	35		0.284584	0.503501	0.745426
LDONIE_06765	3	53	4	41		0.696979	0.583368	0.926187
LDONIE_07105	3	53	9	36		0.0313187	0.229735	0.633448
LDONIE_07600	4	52	9	36		0.0742139	0.311333	0.633448
LDONIE_08725	4	52	10	35		0.0418207	0.27278	0.633448
LDONIE_09950	3	53	9	36		0.0313187	0.229735	0.633448
LEJAMH_00430	2	54	4	41		0.402714	0.383263	0.772276
LEJAMH_00850	3	53	7	38		0.105099	0.310873	0.633448
LEJAMH_01600	2	54	4	41		0.402714	0.383263	0.772276
LEJAMH_02335	2	54	4	41		0.402714	0.383263	0.772276
LEJAMH_02365	2	54	4	41		0.402714	0.383263	0.772276
LEJAMH_03350	11	45	10	35		0.808048	0.856887	1
LEJAMH_04505	2	54	4	41		0.402714	0.383263	0.772276
LEJAMH_05140	2	54	3	42		0.653538	0.521931	0.905955
LEJAMH_05315	3	53	7	38		0.105099	0.310873	0.633448
LEJAMH_05320	3	53	5	40		0.461009	0.456415	0.778506
LEJAMH_05335	3	53	7	38		0.105099	0.310873	0.633448
LEJAMH_05835	3	53	7	38		0.105099	0.310873	0.633448
LEJAMH_06665	2	54	4	41		0.402714	0.383263	0.772276
LEJAMH_06685	0	56	2	43		0.19604	0	0.698336
LEJAMH_07190	2	54	4	41		0.402714	0.383263	0.772276
LEJAMH_07845	2	54	4	41		0.402714	0.383263	0.772276
LEJAMH_08955	2	54	4	41		0.402714	0.383263	0.772276
LEJAMH_10415	2	54	3	42		0.653538	0.521931	0.905955
LEJAMH_10565	7	49	6	39		1	0.929255	1
LEJAMH_10630	3	53	0	45		0.251485	Inf	0.745426
LHIBNM_00640	1	55	0	45		1	Inf	1
LHIBNM_01065	1	55	0	45		1	Inf	1
LHIBNM_01070	1	55	0	45		1	Inf	1
LHIBNM_01540	1	55	0	45		1	Inf	1
LHIBNM_01915	1	55	0	45		1	Inf	1
LHIBNM_02960	1	55	0	45		1	Inf	1
LHIBNM_03620	1	55	0	45		1	Inf	1
LHIBNM_04550	1	55	0	45		1	Inf	1
LHIBNM_04555	1	55	0	45		1	Inf	1
LHIBNM_07510	1	55	0	45		1	Inf	1
LHIBNM_07570	1	55	0	45		1	Inf	1
LHIBNM_08135	1	55	0	45		1	Inf	1
LHIBNM_08930	2	54	0	45		0.50099	Inf	0.801457
LHIBNM_09220	1	55	0	45		1	Inf	1
LHOFJC_00405	7	49	2	43		0.291966	3.04102	0.745426
LHOFJC_00410	9	47	7	38		1	1.03912	1
LHOFJC_00550	21	35	18	27		0.839048	0.900942	1
LHOFJC_02475	1	55	0	45		1	Inf	1
LHOFJC_02790	2	54	3	42		0.653538	0.521931	0.905955
LHOFJC_02895	5	51	2	43		0.456849	2.09322	0.778506
LHOFJC_03500	5	51	2	43		0.456849	2.09322	0.778506
LHOFJC_03570	7	49	1	44		0.0723103	6.1957	0.633448
LHOFJC_03665	28	28	23	22		1	0.956918	1
LHOFJC_04085	12	44	13	32		0.487655	0.674032	0.801457
LHOFJC_05080	2	54	0	45		0.50099	Inf	0.801457
LHOFJC_06515	7	49	3	42		0.505296	1.98697	0.801457
LHOFJC_06670	3	53	0	45		0.251485	Inf	0.745426
LHOFJC_06815	5	51	2	43		0.456849	2.09322	0.778506
LHOFJC_06850	2	54	1	44		1	1.62208	1
LHOFJC_07210	2	54	0	45		0.50099	Inf	0.801457
LHOFJC_07455	7	49	3	42		0.505296	1.98697	0.801457
LHOFJC_09365	6	50	1	44		0.12759	5.20983	0.676725
LKBEKL_00565	3	53	1	44		0.626591	2.47015	0.885125
LKBEKL_00915	3	53	0	45		0.251485	Inf	0.745426
LKBEKL_02320	7	49	6	39		1	0.929255	1
LKBEKL_02385	3	53	0	45		0.251485	Inf	0.745426
LKBEKL_02570	7	49	3	42		0.505296	1.98697	0.801457
LKBEKL_02575	4	52	3	42		1	1.07616	1
LKBEKL_03475	11	45	4	41		0.164998	2.4841	0.676725
LKBEKL_03480	11	45	4	41		0.164998	2.4841	0.676725
LKBEKL_03495	3	53	0	45		0.251485	Inf	0.745426
LKBEKL_04385	2	54	1	44		1	1.62208	1
LKBEKL_06115	4	52	1	44		0.377652	3.34922	0.772276
LKBEKL_07705	12	44	6	39		0.433309	1.76293	0.778506
LKDAMH_00125	12	44	6	39		0.433309	1.76293	0.778506
LKDAMH_00745	5	51	5	40		0.748204	0.786224	0.963259
LKDAMH_01585	1	55	1	44		1	0.801788	1
LKDAMH_02340	7	49	5	40		1	1.14136	1
LKDAMH_02525	2	54	2	43		1	0.798113	1
LKDAMH_03150	3	53	3	42		1	0.7943	1
LKDAMH_03320	7	49	5	40		1	1.14136	1
LKDAMH_04130	0	56	1	44		0.445545	0	0.778506
LKDAMH_05325	3	53	3	42		1	0.7943	1
LKDAMH_06080	5	51	4	41		1	1.00485	1
LKDAMH_06200	10	46	7	38		0.79577	1.1782	1
LKDAMH_06205	3	53	3	42		1	0.7943	1
LKDAMH_06265	7	49	5	40		1	1.14136	1
LKDAMH_06560	2	54	1	44		1	1.62208	1
LKDAMH_06885	2	54	3	42		0.653538	0.521931	0.905955
LKDAMH_08650	3	53	2	43		1	1.21464	1
LLBEKP_00445	10	46	14	31		0.158914	0.484946	0.676725
LLBEKP_01345	8	48	8	37		0.785021	0.772847	0.993189
LLBEKP_02300	29	27	23	22		1	1.02711	1
LLBEKP_02740	5	51	1	44		0.221664	4.26175	0.745426
LLBEKP_03315	18	38	17	28		0.674465	0.782126	0.925908
LLBEKP_03910	25	31	22	23		0.692872	0.844541	0.925908
LLBEKP_04085	22	34	20	25		0.685878	0.810537	0.925908
LLBEKP_04090	9	47	13	32		0.148656	0.474963	0.676725
LLBEKP_05250	4	52	9	36		0.0742139	0.311333	0.633448
LLBEKP_06095	6	50	6	39		0.762303	0.781944	0.971691
LLBEKP_06545	12	44	15	30		0.257912	0.548796	0.745426
LLBEKP_06635	13	43	15	30		0.273419	0.607739	0.745426
LLBEKP_07390	2	54	5	40		0.236983	0.299815	0.745426
LLBEKP_08230	25	31	22	23		0.692872	0.844541	0.925908
LLBEKP_08505	0	56	1	44		0.445545	0	0.778506
LLBEKP_08945	0	56	3	42		0.0851485	0	0.633448
LNJBNJ_00935	3	53	1	44		0.626591	2.47015	0.885125
LNJBNJ_01170	4	52	1	44		0.377652	3.34922	0.772276
LNJBNJ_03160	12	44	6	39		0.433309	1.76293	0.778506
LNJBNJ_05685	3	53	1	44		0.626591	2.47015	0.885125
LNJBNJ_06155	3	53	0	45		0.251485	Inf	0.745426
LNJBNJ_07655	3	53	1	44		0.626591	2.47015	0.885125
LNJBNJ_07730	2	54	0	45		0.50099	Inf	0.801457
LNJBNJ_07935	8	48	3	42		0.337261	2.31503	0.745426
LNJBNJ_07940	8	48	4	41		0.540452	1.69957	0.842042
LNJBNJ_08945	10	46	4	41		0.252419	2.2115	0.745426
LNJBNJ_08950	11	45	4	41		0.164998	2.4841	0.676725
LNJBNJ_08965	3	53	0	45		0.251485	Inf	0.745426
LNJBNJ_10095	1	55	0	45		1	Inf	1
LNJBNJ_10300	31	25	19	26		0.231361	1.68792	0.745426
MBHKLP_00510	2	54	1	44		1	1.62208	1
MBHKLP_00675	10	46	6	39		0.593555	1.40828	0.879979
MBHKLP_00680	7	49	2	43		0.291966	3.04102	0.745426
MBHKLP_02445	7	49	2	43		0.291966	3.04102	0.745426
MBHKLP_02515	5	51	2	43		0.456849	2.09322	0.778506
MBHKLP_03155	6	50	2	43		0.293429	2.55771	0.745426
MBHKLP_03260	7	49	12	33		0.0794069	0.396601	0.633448
MBHKLP_03830	7	49	2	43		0.291966	3.04102	0.745426
MBHKLP_03955	4	52	3	42		1	1.07616	1
MBHKLP_04455	5	51	2	43		0.456849	2.09322	0.778506
MBHKLP_05395	7	49	4	41		0.750418	1.45888	0.963259
MBHKLP_06965	9	47	9	36		0.613226	0.768008	0.885125
MBHKLP_07410	21	35	17	28		1	0.988349	1
MBHKLP_08275	5	51	2	43		0.456849	2.09322	0.778506
MHKAEF_00490	2	54	4	41		0.402714	0.383263	0.772276
MHKAEF_00910	3	53	7	38		0.105099	0.310873	0.633448
MHKAEF_01660	2	54	4	41		0.402714	0.383263	0.772276
MHKAEF_02395	2	54	4	41		0.402714	0.383263	0.772276
MHKAEF_02425	2	54	4	41		0.402714	0.383263	0.772276
MHKAEF_03315	3	53	7	38		0.105099	0.310873	0.633448
MHKAEF_03330	3	53	5	40		0.461009	0.456415	0.778506
MHKAEF_03335	3	53	7	38		0.105099	0.310873	0.633448
MHKAEF_03510	2	54	3	42		0.653538	0.521931	0.905955
MHKAEF_04145	2	54	4	41		0.402714	0.383263	0.772276
MHKAEF_05300	11	45	10	35		0.808048	0.856887	1
MHKAEF_06220	2	54	4	41		0.402714	0.383263	0.772276
MHKAEF_06875	2	54	4	41		0.402714	0.383263	0.772276
MHKAEF_07610	2	54	4	41		0.402714	0.383263	0.772276
MHKAEF_08495	2	54	4	41		0.402714	0.383263	0.772276
MHKAEF_08515	0	56	2	43		0.19604	0	0.698336
MHKAEF_09125	3	53	7	38		0.105099	0.310873	0.633448
MHKAEF_10180	2	54	3	42		0.653538	0.521931	0.905955
MILIOM_01285	4	52	10	35		0.0418207	0.27278	0.633448
MILIOM_01510	7	49	10	35		0.284584	0.503501	0.745426
MILIOM_02225	3	53	7	38		0.105099	0.310873	0.633448
MILIOM_02765	2	54	3	42		0.653538	0.521931	0.905955
MILIOM_03285	3	53	7	38		0.105099	0.310873	0.633448
MILIOM_03880	0	56	5	40		0.0154245	0	0.633448
MILIOM_04055	3	53	3	42		1	0.7943	1
MILIOM_04350	4	52	9	36		0.0742139	0.311333	0.633448
MILIOM_04645	3	53	8	37		0.0583858	0.265261	0.633448
MILIOM_05295	4	52	9	36		0.0742139	0.311333	0.633448
MILIOM_05345	5	51	6	39		0.533012	0.640152	0.833182
MILIOM_05465	7	49	10	35		0.284584	0.503501	0.745426
MILIOM_05475	7	49	10	35		0.284584	0.503501	0.745426
MILIOM_06625	0	56	2	43		0.19604	0	0.698336
MILIOM_07470	4	52	9	36		0.0742139	0.311333	0.633448
MILIOM_07835	3	53	9	36		0.0313187	0.229735	0.633448
MILIOM_08615	3	53	7	38		0.105099	0.310873	0.633448
MILIOM_08655	3	53	8	37		0.0583858	0.265261	0.633448
MILIOM_09960	4	52	9	36		0.0742139	0.311333	0.633448
MILIOM_10055	3	53	9	36		0.0313187	0.229735	0.633448
MJHIBB_00585	4	52	0	45		0.12645	Inf	0.676725
MJHIBB_01635	8	48	3	42		0.337261	2.31503	0.745426
MJHIBB_01775	7	49	2	43		0.291966	3.04102	0.745426
MJHIBB_01780	6	50	3	42		0.727468	1.67168	0.946784
MJHIBB_02255	8	48	3	42		0.337261	2.31503	0.745426
MJHIBB_03385	8	48	3	42		0.337261	2.31503	0.745426
MJHIBB_03705	8	48	3	42		0.337261	2.31503	0.745426
MJHIBB_03875	8	48	3	42		0.337261	2.31503	0.745426
MJHIBB_03880	3	53	0	45		0.251485	Inf	0.745426
MJHIBB_05105	11	45	4	41		0.164998	2.4841	0.676725
MJHIBB_05110	11	45	4	41		0.164998	2.4841	0.676725
MJHIBB_05140	8	48	3	42		0.337261	2.31503	0.745426
MJHIBB_06295	8	48	3	42		0.337261	2.31503	0.745426
MJHIBB_07520	8	48	3	42		0.337261	2.31503	0.745426
MJHIBB_07780	8	48	3	42		0.337261	2.31503	0.745426
MJHIBB_07995	6	50	2	43		0.293429	2.55771	0.745426
MJHIBB_08040	11	45	10	35		0.808048	0.856887	1
MJHIBB_08385	1	55	1	44		1	0.801788	1
MJHIBB_09205	3	53	3	42		1	0.7943	1
MJHIBB_09630	12	44	7	38		0.609524	1.47485	0.885125
MLCCNE_00655	2	54	0	45		0.50099	Inf	0.801457
MLCCNE_01250	4	52	2	43		0.689628	1.64593	0.925908
MLCCNE_01695	19	37	14	31		0.832707	1.13562	1
MLCCNE_01790	7	49	2	43		0.291966	3.04102	0.745426
MLCCNE_01860	5	51	2	43		0.456849	2.09322	0.778506
MLCCNE_02430	6	50	2	43		0.293429	2.55771	0.745426
MLCCNE_02535	2	54	1	44		1	1.62208	1
MLCCNE_04440	13	43	15	30		0.273419	0.607739	0.745426
MLCCNE_04580	8	48	4	41		0.540452	1.69957	0.842042
MLCCNE_04585	7	49	2	43		0.291966	3.04102	0.745426
MLCCNE_05535	7	49	3	42		0.505296	1.98697	0.801457
MLCCNE_05790	2	54	0	45		0.50099	Inf	0.801457
MLCCNE_06365	5	51	2	43		0.456849	2.09322	0.778506
MLCCNE_06505	3	53	0	45		0.251485	Inf	0.745426
MLCCNE_06655	7	49	3	42		0.505296	1.98697	0.801457
MLCCNE_08115	5	51	2	43		0.456849	2.09322	0.778506
MLLHKN_00425	14	42	16	29		0.278975	0.607258	0.745426
MLLHKN_03360	0	56	1	44		0.445545	0	0.778506
MLLHKN_03545	10	46	13	32		0.235126	0.538499	0.745426
MLLHKN_04205	9	47	12	33		0.223349	0.530009	0.745426
MLLHKN_05160	1	55	5	40		0.0860322	0.147934	0.633448
MLLHKN_05525	13	43	9	36		0.809967	1.20704	1
MLLHKN_05890	3	53	3	42		1	0.7943	1
MLLHKN_06605	13	43	15	30		0.273419	0.607739	0.745426
MLLHKN_06900	29	27	23	22		1	1.02711	1
MLLHKN_07205	25	31	22	23		0.692872	0.844541	0.925908
MLLHKN_07320	15	41	14	31		0.66346	0.811811	0.918102
MLLHKN_07325	10	46	14	31		0.158914	0.484946	0.676725
MLLHKN_07405	21	35	21	24		0.418371	0.688321	0.778506
MLLHKN_07655	1	55	7	38		0.02067	0.100691	0.633448
MLLHKN_07980	0	56	1	44		0.445545	0	0.778506
MLLHKN_09190	11	45	13	32		0.348593	0.604811	0.75987
MLLHKN_09290	0	56	5	40		0.0154245	0	0.633448
MLLHKN_09395	2	54	5	40		0.236983	0.299815	0.745426
MLLHKN_09860	1	55	2	43		0.584158	0.394511	0.871834
MLLHKN_09940	6	50	6	39		0.762303	0.781944	0.971691
MLLHKN_10260	8	48	3	42		0.337261	2.31503	0.745426
MMMLKC_00355	8	48	2	43		0.178295	3.54374	0.676725
MMMLKC_00820	1	55	1	44		1	0.801788	1
MMMLKC_02285	8	48	2	43		0.178295	3.54374	0.676725
MMMLKC_02965	8	48	2	43		0.178295	3.54374	0.676725
MMMLKC_03140	8	48	2	43		0.178295	3.54374	0.676725
MMMLKC_04900	7	49	0	45		0.0161223	Inf	0.633448
MMMLKC_05160	8	48	2	43		0.178295	3.54374	0.676725
MMMLKC_06765	7	49	0	45		0.0161223	Inf	0.633448
MMMLKC_07235	4	52	0	45		0.12645	Inf	0.676725
MMMLKC_07245	3	53	0	45		0.251485	Inf	0.745426
MMMLKC_07295	8	48	2	43		0.178295	3.54374	0.676725
MMMLKC_07495	8	48	2	43		0.178295	3.54374	0.676725
MMMLKC_07960	7	49	0	45		0.0161223	Inf	0.633448
MMMLKC_08000	1	55	0	45		1	Inf	1
MMMLKC_08410	8	48	2	43		0.178295	3.54374	0.676725
MMMLKC_09500	8	48	2	43		0.178295	3.54374	0.676725
MMMLKC_09505	7	49	0	45		0.0161223	Inf	0.633448
MMMLKC_09780	8	48	2	43		0.178295	3.54374	0.676725
MMMLKC_09785	8	48	2	43		0.178295	3.54374	0.676725
MMMNBM_00125	2	54	2	43		1	0.798113	1
MMMNBM_00885	10	46	13	32		0.235126	0.538499	0.745426
MMMNBM_02765	0	56	1	44		0.445545	0	0.778506
MMMNBM_02935	10	46	14	31		0.158914	0.484946	0.676725
MMMNBM_03460	3	53	3	42		1	0.7943	1
MMMNBM_03790	10	46	11	34		0.465743	0.674635	0.785941
MMMNBM_04125	11	45	13	32		0.348593	0.604811	0.75987
MMMNBM_04500	11	45	10	35		0.808048	0.856887	1
MMMNBM_04865	32	24	22	23		0.429397	1.38931	0.778506
MMMNBM_06515	25	31	22	23		0.692872	0.844541	0.925908
MMMNBM_06665	18	38	18	27		0.531005	0.712971	0.832785
MMMNBM_06670	14	42	15	30		0.383877	0.669399	0.772276
MMMNBM_06825	2	54	1	44		1	1.62208	1
MMMNBM_07075	3	53	3	42		1	0.7943	1
MMMNBM_08315	9	47	10	35		0.454074	0.672921	0.778506
MMMNBM_08465	13	43	15	30		0.273419	0.607739	0.745426
MMMNBM_08585	7	49	9	36		0.412201	0.574668	0.774833
MMMNBM_09040	6	50	6	39		0.762303	0.781944	0.971691
MMMNBM_09320	8	48	3	42		0.337261	2.31503	0.745426
MMMOHJ_00675	3	53	0	45		0.251485	Inf	0.745426
MMMOHJ_00690	11	45	4	41		0.164998	2.4841	0.676725
MMMOHJ_00695	10	46	4	41		0.252419	2.2115	0.745426
MMMOHJ_01575	1	55	0	45		1	Inf	1
MMMOHJ_01580	1	55	0	45		1	Inf	1
MMMOHJ_01765	3	53	0	45		0.251485	Inf	0.745426
MMMOHJ_01830	8	48	6	39		1	1.08251	1
MMMOHJ_03945	3	53	1	44		0.626591	2.47015	0.885125
MMMOHJ_04205	3	53	0	45		0.251485	Inf	0.745426
MMMOHJ_05405	4	52	1	44		0.377652	3.34922	0.772276
MMMOHJ_06435	13	43	6	39		0.305805	1.95236	0.745426
MMMOHJ_06835	3	53	1	44		0.626591	2.47015	0.885125
MMMOHJ_07170	3	53	0	45		0.251485	Inf	0.745426
[truncated: 377 more rows]

## Sheet: known_drug_metabolism_pathway
Gene_label	resistant_present	resistant_absent	sensitive_present	sensitive_absent	fisher_test	p_value	odds_ratio	FDR	freq_diff	significance
ARAF	0	22	0	28		1	0	1	0	Not significant
ARC	0	22	0	28		1	0	1	0	Not significant
BAX	0	22	0	28		1	0	1	0	Not significant
CBL	0	22	0	28		1	0	1	0	Not significant
DCK	0	22	0	28		1	0	1	0	Not significant
DEDD	0	22	0	28		1	0	1	0	Not significant
DHFR	1	21	8	20		0.0595513	0.123378	1	-0.24026	Not significant
EBP	0	22	0	28		1	0	1	0	Not significant
FADD	0	22	0	28		1	0	1	0	Not significant
GSS	0	22	0	28		1	0	1	0	Not significant
GST	0	22	0	28		1	0	1	0	Not significant
LDHA	0	22	0	28		1	0	1	0	Not significant
LRP	0	22	0	28		1	0	1	0	Not significant
MVK	22	0	28	0		1	0	1	0	Not significant
OGT	0	22	0	28		1	0	1	0	Not significant
PURA	22	0	28	0		1	0	1	0	Not significant
RELB	4	18	11	17		0.130536	0.350781	1	-0.211039	Not significant
SDHB	0	22	0	28		1	0	1	0	Not significant
Tkt	17	5	23	5		0.731719	0.743671	1	-0.0487013	Not significant
XDH	0	22	0	28		1	0	1	0	Not significant
cls	22	0	26	2		0.497143	Inf	1	0.0714286	Not significant

## Sheet: MFS
Gene_label	resistant_present	resistant_absent	sensitive_present	sensitive_absent	fisher_test	p_value	odds_ratio	FDR	freq_diff	significance
acrA	1	21	0	28		0.44	Inf	1	0.0454545	Not significant
araJ	1	21	0	28		0.44	Inf	1	0.0454545	Not significant
cynX	7	15	5	23		0.324331	2.11321	1	0.13961	Not significant
entS	11	11	12	16		0.775906	1.32563	1	0.0714286	Not significant
fieF	6	16	1	27		0.0344773	9.68998	0.48787	0.237013	Enriched in Resistant
fieF~~~mntE	6	16	11	17		0.54844	0.585892	1	-0.12013	Not significant
group_1022	2	20	1	27		0.575714	2.64713	1	0.0551948	Not significant
group_10593	1	21	0	28		0.44	Inf	1	0.0454545	Not significant
group_1115	0	22	0	28		1	0	1	0	Not significant
group_11564	0	22	0	28		1	0	1	0	Not significant
group_11627	0	22	0	28		1	0	1	0	Not significant
group_1268	0	22	2	26		0.497143	0	1	-0.0714286	Not significant
group_13868	0	22	0	28		1	0	1	0	Not significant
group_14346	0	22	0	28		1	0	1	0	Not significant
group_1565	0	22	0	28		1	0	1	0	Not significant
group_15671	0	22	0	28		1	0	1	0	Not significant
group_16070	0	22	0	28		1	0	1	0	Not significant
group_1611	2	20	5	23		0.444403	0.466838	1	-0.0876623	Not significant
group_1633	0	22	2	26		0.497143	0	1	-0.0714286	Not significant
group_16355	0	22	0	28		1	0	1	0	Not significant
group_16567	0	22	1	27		1	0	1	-0.0357143	Not significant
group_16700	0	22	1	27		1	0	1	-0.0357143	Not significant
group_16870	0	22	2	26		0.497143	0	1	-0.0714286	Not significant
group_17153	6	16	1	27		0.0344773	9.68998	0.48787	0.237013	Enriched in Resistant
group_17201	2	20	2	26		1	1.29312	1	0.0194805	Not significant
group_17606	0	22	2	26		0.497143	0	1	-0.0714286	Not significant
group_17802	2	20	1	27		0.575714	2.64713	1	0.0551948	Not significant
group_17830	0	22	6	22		0.0284036	0	0.48787	-0.214286	Enriched in Sensitive
group_1789	0	22	4	24		0.120669	0	0.68204	-0.142857	Not significant
group_17988	12	10	12	16		0.569274	1.58484	1	0.116883	Not significant
group_18079	0	22	2	26		0.497143	0	1	-0.0714286	Not significant
group_18510	1	21	7	21		0.0637984	0.147612	0.48787	-0.204545	Not significant
group_18718	0	22	0	28		1	0	1	0	Not significant
group_19258	0	22	0	28		1	0	1	0	Not significant
group_19325	0	22	1	27		1	0	1	-0.0357143	Not significant
group_19331	3	19	3	25		1	1.3085	1	0.0292208	Not significant
group_1962	3	19	11	17		0.0605337	0.250841	0.48787	-0.256494	Not significant
group_19822	6	16	0	28		0.00469539	Inf	0.48787	0.272727	Enriched in Resistant
group_19873	0	22	0	28		1	0	1	0	Not significant
group_19885	3	19	3	25		1	1.3085	1	0.0292208	Not significant
group_19921	1	21	7	21		0.0637984	0.147612	0.48787	-0.204545	Not significant
group_19968	6	16	1	27		0.0344773	9.68998	0.48787	0.237013	Enriched in Resistant
group_20070	0	22	1	27		1	0	1	-0.0357143	Not significant
group_20108	3	19	3	25		1	1.3085	1	0.0292208	Not significant
group_20205	5	17	3	25		0.27702	2.40645	1	0.12013	Not significant
group_20283	1	21	7	21		0.0637984	0.147612	0.48787	-0.204545	Not significant
group_20471	2	20	8	20		0.153539	0.256517	0.83167	-0.194805	Not significant
group_2073	0	22	2	26		0.497143	0	1	-0.0714286	Not significant
group_20798	3	19	0	28		0.0785714	Inf	0.537594	0.136364	Not significant
group_20823	0	22	2	26		0.497143	0	1	-0.0714286	Not significant
group_21010	2	20	0	28		0.188571	Inf	0.980571	0.0909091	Not significant
group_21048	6	16	4	24		0.30226	2.21285	1	0.12987	Not significant
group_21056	1	21	1	27		1	1.2792	1	0.00974026	Not significant
group_21121	1	21	7	21		0.0637984	0.147612	0.48787	-0.204545	Not significant
group_21215	0	22	6	22		0.0284036	0	0.48787	-0.214286	Enriched in Sensitive
group_21247	4	18	3	25		0.68432	1.82872	1	0.0746753	Not significant
group_21419	1	21	1	27		1	1.2792	1	0.00974026	Not significant
group_2151	3	19	3	25		1	1.3085	1	0.0292208	Not significant
group_21568	6	16	1	27		0.0344773	9.68998	0.48787	0.237013	Enriched in Resistant
group_21576	4	18	4	24		0.71809	1.32559	1	0.038961	Not significant
group_2169	0	22	4	24		0.120669	0	0.68204	-0.142857	Not significant
group_21738	0	22	2	26		0.497143	0	1	-0.0714286	Not significant
group_22170	0	22	0	28		1	0	1	0	Not significant
group_22631	0	22	0	28		1	0	1	0	Not significant
group_2496	5	17	12	16		0.228731	0.399581	1	-0.201299	Not significant
group_25	7	15	6	22		0.520393	1.69242	1	0.103896	Not significant
group_2858	1	21	7	21		0.0637984	0.147612	0.48787	-0.204545	Not significant
group_2877	4	18	3	25		0.68432	1.82872	1	0.0746753	Not significant
group_2887	1	21	7	21		0.0637984	0.147612	0.48787	-0.204545	Not significant
group_2895	0	22	2	26		0.497143	0	1	-0.0714286	Not significant
group_2947	1	21	7	21		0.0637984	0.147612	0.48787	-0.204545	Not significant
group_2960	0	22	1	27		1	0	1	-0.0357143	Not significant
group_2978	7	15	3	25		0.083645	3.78055	0.543692	0.211039	Not significant
group_3070	3	19	14	14		0.00836957	0.163966	0.48787	-0.363636	Enriched in Sensitive
group_3124	1	21	0	28		0.44	Inf	1	0.0454545	Not significant
group_3937	1	21	0	28		0.44	Inf	1	0.0454545	Not significant
group_4020	0	22	1	27		1	0	1	-0.0357143	Not significant
group_4128	1	21	0	28		0.44	Inf	1	0.0454545	Not significant
group_4168	1	21	0	28		0.44	Inf	1	0.0454545	Not significant
group_4185	0	22	0	28		1	0	1	0	Not significant
group_4292	0	22	1	27		1	0	1	-0.0357143	Not significant
group_4448	1	21	0	28		0.44	Inf	1	0.0454545	Not significant
group_4454	0	22	0	28		1	0	1	0	Not significant
group_4461	1	21	0	28		0.44	Inf	1	0.0454545	Not significant
group_4478	1	21	0	28		0.44	Inf	1	0.0454545	Not significant
group_4491	1	21	1	27		1	1.2792	1	0.00974026	Not significant
group_4493	0	22	0	28		1	0	1	0	Not significant
group_4537	0	22	1	27		1	0	1	-0.0357143	Not significant
group_4555	0	22	1	27		1	0	1	-0.0357143	Not significant
group_4603	0	22	0	28		1	0	1	0	Not significant
group_4611	3	19	0	28		0.0785714	Inf	0.537594	0.136364	Not significant
group_4667	1	21	0	28		0.44	Inf	1	0.0454545	Not significant
group_4679	1	21	0	28		0.44	Inf	1	0.0454545	Not significant
group_4694	0	22	2	26		0.497143	0	1	-0.0714286	Not significant
group_4699	0	22	1	27		1	0	1	-0.0357143	Not significant
group_4704	1	21	0	28		0.44	Inf	1	0.0454545	Not significant
group_4712	0	22	1	27		1	0	1	-0.0357143	Not significant
group_4717	1	21	0	28		0.44	Inf	1	0.0454545	Not significant
group_4727	0	22	1	27		1	0	1	-0.0357143	Not significant
group_4741	0	22	0	28		1	0	1	0	Not significant
group_4750	0	22	0	28		1	0	1	0	Not significant
group_4754	1	21	0	28		0.44	Inf	1	0.0454545	Not significant
group_4803	0	22	0	28		1	0	1	0	Not significant
group_4833	0	22	0	28		1	0	1	0	Not significant
group_4881	0	22	2	26		0.497143	0	1	-0.0714286	Not significant
group_4980	1	21	0	28		0.44	Inf	1	0.0454545	Not significant
group_5045	0	22	1	27		1	0	1	-0.0357143	Not significant
group_5049	0	22	0	28		1	0	1	0	Not significant
group_5091	0	22	0	28		1	0	1	0	Not significant
group_5100	0	22	1	27		1	0	1	-0.0357143	Not significant
group_7807	0	22	0	28		1	0	1	0	Not significant
group_7879	0	22	0	28		1	0	1	0	Not significant
group_8625	1	21	0	28		0.44	Inf	1	0.0454545	Not significant
group_8824	0	22	0	28		1	0	1	0	Not significant
group_9501	0	22	1	27		1	0	1	-0.0357143	Not significant
group_9626	0	22	0	28		1	0	1	0	Not significant
group_9985	0	22	0	28		1	0	1	0	Not significant
lmrB	3	19	3	25		1	1.3085	1	0.0292208	Not significant
mdeA	1	21	0	28		0.44	Inf	1	0.0454545	Not significant
mdtK~~~norM~~~pdrM	6	16	2	26		0.116331	4.72053	0.68204	0.201299	Not significant
mefA	1	21	0	28		0.44	Inf	1	0.0454545	Not significant
natB	1	21	5	23		0.21087	0.224865	1	-0.133117	Not significant
norM	1	21	0	28		0.44	Inf	1	0.0454545	Not significant
norM~~~dinF	5	17	9	19		0.537412	0.626811	1	-0.0941558	Not significant
norM~~~mepA	14	8	14	14		0.3978	1.73041	1	0.136364	Not significant
pmrA	0	22	0	28		1	0	1	0	Not significant
soxR~~~merR~~~pmrA	3	19	5	23		1	0.730907	1	-0.0422078	Not significant
ydhC~~~pmrA	6	16	12	16		0.374399	0.506984	1	-0.155844	Not significant
yycB	1	21	7	21		0.0637984	0.147612	0.48787	-0.204545	Not significant
NA	3	19	5	23		1	0.730907	1	-0.0422078	Not significant

## Sheet: Plasmid
subject_id	resistant_present	resistant_absent	sensitive_present	sensitive_absent	fisher_test	p_value	odds_ratio	FDR	freq_diff	significance
repUS38_1_rep(pFW213)_EU685104	0	22	2	26		0.497143	0	0.497143	-0.0714286	Not significant
repUS43_1_CDS12738(DOp1)_CP003584	2	20	10	18		0.0447174	0.185867	0.0894347	-0.266234	Enriched in Sensitive

## Sheet: VFDB
VF_Gene	resistant_present	resistant_absent	sensitive_present	sensitive_absent	fisher_test	p_value	odds_ratio	FDR	freq_diff	significance
AAF34780	0	56	1	44		0.445545	0	0.730198	-0.0222222	Not significant
ABK58691	3	53	0	45		0.251485	Inf	0.674437	0.0535714	Not significant
SGO_RS00800	2	54	4	41		0.402714	0.383263	0.730198	-0.0531746	Not significant
SGO_RS04955	3	53	7	38		0.105099	0.310873	0.64081	-0.101984	Not significant
SGO_RS05010	2	54	3	42		0.653538	0.521931	0.929127	-0.0309524	Not significant
SGO_RS05015	2	54	4	41		0.402714	0.383263	0.730198	-0.0531746	Not significant
SGO_RS05020	8	48	7	38		1	0.905663	1	-0.0126984	Not significant
SGO_RS05025	3	53	5	40		0.461009	0.456415	0.735123	-0.0575397	Not significant
SGO_RS05035	2	54	4	41		0.402714	0.383263	0.730198	-0.0531746	Not significant
SGO_RS08445	2	54	4	41		0.402714	0.383263	0.730198	-0.0531746	Not significant
SGO_RS09810	2	54	4	41		0.402714	0.383263	0.730198	-0.0531746	Not significant
SGO_RS09900	0	56	1	44		0.445545	0	0.730198	-0.0222222	Not significant
SGO_RS09905	0	56	1	44		0.445545	0	0.730198	-0.0222222	Not significant
SGO_RS09910	0	56	1	44		0.445545	0	0.730198	-0.0222222	Not significant
SGO_RS09915	2	54	4	41		0.402714	0.383263	0.730198	-0.0531746	Not significant
SGO_RS10300	2	54	4	41		0.402714	0.383263	0.730198	-0.0531746	Not significant
SMUNN2025_RS00190	1	55	0	45		1	Inf	1	0.0178571	Not significant
SMUNN2025_RS03705	1	55	0	45		1	Inf	1	0.0178571	Not significant
SMUNN2025_RS05360	1	55	0	45		1	Inf	1	0.0178571	Not significant
SMUNN2025_RS06365	1	55	0	45		1	Inf	1	0.0178571	Not significant
SMUNN2025_RS09535	1	55	0	45		1	Inf	1	0.0178571	Not significant
SMU_RS01255	1	55	0	45		1	Inf	1	0.0178571	Not significant
SMU_RS03820	1	55	0	45		1	Inf	1	0.0178571	Not significant
SMU_RS03825	1	55	0	45		1	Inf	1	0.0178571	Not significant
SMU_RS03830	1	55	0	45		1	Inf	1	0.0178571	Not significant
SMU_RS06625	1	55	0	45		1	Inf	1	0.0178571	Not significant
SPCG_RS01825	0	56	1	44		0.445545	0	0.730198	-0.0222222	Not significant
SPD_RS01725	0	56	1	44		0.445545	0	0.730198	-0.0222222	Not significant
SPD_RS01730	0	56	1	44		0.445545	0	0.730198	-0.0222222	Not significant
SPD_RS01735	0	56	2	43		0.19604	0	0.64081	-0.0444444	Not significant
SPR_RS06970	0	56	1	44		0.445545	0	0.730198	-0.0222222	Not significant
SSA_RS06920	3	53	7	38		0.105099	0.310873	0.64081	-0.101984	Not significant
SSA_RS07375	0	56	2	43		0.19604	0	0.64081	-0.0444444	Not significant
SSA_RS07380	0	56	2	43		0.19604	0	0.64081	-0.0444444	Not significant
SSA_RS07385	0	56	2	43		0.19604	0	0.64081	-0.0444444	Not significant
SSA_RS07390	0	56	2	43		0.19604	0	0.64081	-0.0444444	Not significant
SSA_RS07400	0	56	2	43		0.19604	0	0.64081	-0.0444444	Not significant
SSA_RS07405	0	56	2	43		0.19604	0	0.64081	-0.0444444	Not significant
SSA_RS07410	0	56	3	42		0.0851485	0	0.64081	-0.0666667	Not significant
SSA_RS07415	1	55	3	42		0.321075	0.257842	0.730198	-0.0488095	Not significant
SSA_RS07420	1	55	3	42		0.321075	0.257842	0.730198	-0.0488095	Not significant
SSA_RS07425	0	56	2	43		0.19604	0	0.64081	-0.0444444	Not significant
SSA_RS07430	0	56	3	42		0.0851485	0	0.64081	-0.0666667	Not significant
SSA_RS07435	0	56	2	43		0.19604	0	0.64081	-0.0444444	Not significant
SSA_RS10860	0	56	2	43		0.19604	0	0.64081	-0.0444444	Not significant
SSA_RS10865	0	56	2	43		0.19604	0	0.64081	-0.0444444	Not significant
SSA_RS10870	0	56	2	43		0.19604	0	0.64081	-0.0444444	Not significant
SSA_RS10875	0	56	2	43		0.19604	0	0.64081	-0.0444444	Not significant
SSA_RS10880	0	56	2	43		0.19604	0	0.64081	-0.0444444	Not significant
SSA_RS10885	0	56	2	43		0.19604	0	0.64081	-0.0444444	Not significant
SSA_RS10890	0	56	2	43		0.19604	0	0.64081	-0.0444444	Not significant
STER_RS05300	3	53	0	45		0.251485	Inf	0.674437	0.0535714	Not significant
STER_RS05305	2	54	0	45		0.50099	Inf	0.73896	0.0357143	Not significant
STER_RS05315	5	51	0	45		0.0636492	Inf	0.577739	0.0892857	Not significant
STER_RS05320	3	53	0	45		0.251485	Inf	0.674437	0.0535714	Not significant
STER_RS06030	5	51	3	42		0.729215	1.36833	1	0.022619	Not significant
STER_RS07055	2	54	0	45		0.50099	Inf	0.73896	0.0357143	Not significant
STER_RS07060	6	50	3	42		0.727468	1.67168	1	0.0404762	Not significant
STER_RS07065	8	48	3	42		0.337261	2.31503	0.730198	0.0761905	Not significant
STER_RS07075	3	53	2	43		1	1.21464	1	0.00912698	Not significant
STER_RS07085	7	49	4	41		0.750418	1.45888	1	0.0361111	Not significant
STER_RS07090	7	49	2	43		0.291966	3.04102	0.730198	0.0805556	Not significant
STER_RS07095	2	54	0	45		0.50099	Inf	0.73896	0.0357143	Not significant
STER_RS07100	6	50	2	43		0.293429	2.55771	0.730198	0.0626984	Not significant
STR_RS05250	2	54	0	45		0.50099	Inf	0.73896	0.0357143	Not significant
STR_RS05260	5	51	0	45		0.0636492	Inf	0.577739	0.0892857	Not significant
STR_RS05265	1	55	0	45		1	Inf	1	0.0178571	Not significant
STR_RS06895	2	54	0	45		0.50099	Inf	0.73896	0.0357143	Not significant
STR_RS06900	6	50	3	42		0.727468	1.67168	1	0.0404762	Not significant
STR_RS06905	6	50	0	45		0.0320463	Inf	0.577739	0.107143	Enriched in Resistant
STU_RS14630	3	53	0	45		0.251485	Inf	0.674437	0.0535714	Not significant
STU_RS14635	2	54	0	45		0.50099	Inf	0.73896	0.0357143	Not significant
STU_RS14645	5	51	0	45		0.0636492	Inf	0.577739	0.0892857	Not significant
STU_RS14650	3	53	0	45		0.251485	Inf	0.674437	0.0535714	Not significant
STU_RS16230	1	55	0	45		1	Inf	1	0.0178571	Not significant
STU_RS16240	1	55	0	45		1	Inf	1	0.0178571	Not significant
STU_RS16245	1	55	0	45		1	Inf	1	0.0178571	Not significant
STU_RS16250	1	55	0	45		1	Inf	1	0.0178571	Not significant
cpbA	0	56	1	44		0.445545	0	0.730198	-0.0222222	Not significant
cppA	6	51	15	35		0.0147189	0.27787	0.577739	-0.22619	Enriched in Sensitive
cps4A	0	56	1	44		0.445545	0	0.730198	-0.0222222	Not significant
cps4B	0	56	2	44		0.200932	0	0.64081	-0.0444444	Not significant
cpsC	0	56	1	44		0.445545	0	0.730198	-0.0222222	Not significant
cshA	0	56	1	44		0.445545	0	0.730198	-0.0222222	Not significant
eno	172	10	154	2		0.0418449	0.22421	0.577739	-0.350794	Enriched in Sensitive
fbp54	27	45	13	36		0.24108	1.65464	0.674437	0.193254	Not significant
galU	1	55	0	45		1	Inf	1	0.0178571	Not significant
gbpA	1	55	0	45		1	Inf	1	0.0178571	Not significant
gbpC	1	55	0	45		1	Inf	1	0.0178571	Not significant
gbpD	1	55	0	45		1	Inf	1	0.0178571	Not significant
gtfB	1	55	0	45		1	Inf	1	0.0178571	Not significant
gtfC	1	55	0	45		1	Inf	1	0.0178571	Not significant
gtfD	1	55	1	44		1	0.801788	1	-0.00436508	Not significant
gtfG	2	54	2	43		1	0.798113	1	-0.00873016	Not significant
htrA/degP	36	42	46	27		0.0497063	0.505437	0.577739	-0.379365	Enriched in Sensitive
hysA	8	54	4	44		0.546107	1.62264	0.785861	0.0539683	Not significant
lmb	18	47	29	28		0.00977325	0.372931	0.577739	-0.323016	Enriched in Sensitive
nanB	1	55	3	42		0.321075	0.257842	0.730198	-0.0488095	Not significant
pavA	51	37	58	21		0.0503815	0.501161	0.577739	-0.378175	Not significant
pblA	1	55	0	45		1	Inf	1	0.0178571	Not significant
piuA	6	53	0	45		0.0350621	Inf	0.577739	0.107143	Enriched in Resistant
plr/gapA	209	7	202	2		0.176594	0.296409	0.64081	-0.756746	Not significant
ply	6	53	0	45		0.0350621	Inf	0.577739	0.107143	Enriched in Resistant
pply	3	53	0	45		0.251485	Inf	0.674437	0.0535714	Not significant
psaA	5	52	12	36		0.0332369	0.291929	0.577739	-0.177381	Enriched in Sensitive
rfbA	48	30	41	24		0.864336	0.937035	1	-0.0539683	Not significant
rfbB	64	22	39	25		0.108767	1.8569	0.64081	0.27619	Not significant
rfbD	39	34	19	32		0.0998254	1.92156	0.64081	0.274206	Not significant
rrgC	0	56	1	44		0.445545	0	0.730198	-0.0222222	Not significant
sipA	5	51	2	43		0.456849	2.09322	0.735123	0.0448413	Not significant
slrA	19	46	30	30		0.0273127	0.41607	0.577739	-0.327381	Enriched in Sensitive
spaP/pac	1	55	0	45		1	Inf	1	0.0178571	Not significant
srtA	7	52	4	42		0.752102	1.40891	1	0.0361111	Not significant
srtG1	0	56	1	44		0.445545	0	0.730198	-0.0222222	Not significant
sspA	0	56	1	44		0.445545	0	0.730198	-0.0222222	Not significant
sspB	1	55	0	45		1	Inf	1	0.0178571	Not significant
tig/ropA	101	28	83	18		0.509322	0.783102	0.741975	-0.040873	Not significant
wapA	1	55	0	45		1	Inf	1	0.0178571	Not significant
