# Supplementary material
Source: Research Square preprint supplement (doi:10.21203/rs.3.rs-8825984/v1)
Supplement: Supplementary file 5 [file e99503abad1b09d99f339c14.xlsx]

## Sheet: PERMDISP_homogeneity_results
Factor	F	p
species	9.15043	0.0001
resistance	1.56645	0.215
location	0.333455	0.5712

## Sheet: PERMDISP_betadisper_results
Factor	F	p
species	9.15043	0.0001
resistance	1.56645	0.215
location	0.333455	0.5712

## Sheet: PERMANOVA_within_species_mitis_
species	Term	Df	SumOfSqs	R2	F	Pr(>F)
Strep. mitis	resistance	1	0.512364	0.145773	2.18972	0.046
Strep. mitis	location	1	0.286977	0.0816479	1.22647	0.2305
Strep. mitis	Residual	12	2.80783	0.798856	NA	NA
Strep. mitis	Total	14	3.51481	1	NA	NA
Strep. parasanguinis	resistance	1	0.321246	0.182023	1.60867	0.1361
Strep. parasanguinis	location	1	0.215473	0.12209	1.079	0.3613
Strep. parasanguinis	Residual	6	1.19817	0.678905	NA	NA
Strep. parasanguinis	Total	8	1.76486	1	NA	NA

## Sheet: PERMANOVA_within_species_ALL_el
species	n_isolates	n_resistant	n_sensitive	Term	Df	SumOfSqs	R2	F	Pr(>F)
Strep. mitis	15	7	8	resistance	1	0.512364	0.145773	2.18972	0.046
Strep. mitis	15	7	8	location	1	0.286977	0.0816479	1.22647	0.2305
Strep. mitis	15	7	8	Residual	12	2.80783	0.798856	NA	NA
Strep. mitis	15	7	8	Total	14	3.51481	1	NA	NA
Strep. parasanguinis	9	6	3	resistance	1	0.321246	0.182023	1.60867	0.1361
Strep. parasanguinis	9	6	3	location	1	0.215473	0.12209	1.079	0.3613
Strep. parasanguinis	9	6	3	Residual	6	1.19817	0.678905	NA	NA
Strep. parasanguinis	9	6	3	Total	8	1.76486	1	NA	NA
Strep. infantis	8	5	3	resistance	1	0.119146	0.065528	0.466835	0.7408
Strep. infantis	8	5	3	location	1	0.433846	0.238608	1.69989	0.1687
Strep. infantis	8	5	3	Residual	5	1.2761	0.701833	NA	NA
Strep. infantis	8	5	3	Total	7	1.81824	1	NA	NA
Strep. oralis	8	5	3	resistance	1	0.298784	0.167544	1.17141	0.2948
Strep. oralis	8	5	3	location	1	0.331309	0.185781	1.29892	0.237
Strep. oralis	8	5	3	Residual	5	1.27532	0.715139	NA	NA
Strep. oralis	8	5	3	Total	7	1.78332	1	NA	NA
Strep. gordonii	6	2	4	resistance	1	0.228356	0.210438	0.973969	0.6
Strep. gordonii	6	2	4	location	1	0.000603748	0.000556376	0.00257507	1
Strep. gordonii	6	2	4	Residual	3	0.703377	0.648188	NA	NA
Strep. gordonii	6	2	4	Total	5	1.08514	1	NA	NA
Strep. hominis	6	3	3	resistance	1	0.297275	0.247623	1.21357	0.3
Strep. hominis	6	3	3	location	1	0.274265	0.228457	1.11964	0.35
Strep. hominis	6	3	3	Residual	3	0.734876	0.612136	NA	NA
Strep. hominis	6	3	3	Total	5	1.20051	1	NA	NA

## Sheet: PERMANOVA_species_resistance_lo
Term	Df	SumOfSqs	R2	F	Pr(>F)
species	34	24.4902	0.925486	35.0139	0.0001
resistance	1	0.0233206	0.000881286	1.13362	0.3119
location	1	0.0359022	0.00135675	1.74521	0.1105
Residual	63	1.29603	0.0489768	NA	NA
Total	99	26.462	1	NA	NA

## Sheet: PERMANOVA_global_species_resist
Term	Df	SumOfSqs	R2	F	Pr(>F)
species	34	24.4902	0.925486	35.0139	0.0001
resistance	1	0.0233206	0.000881286	1.13362	0.3122
location	1	0.0359022	0.00135675	1.74521	0.1102
Residual	63	1.29603	0.0489768	NA	NA
Total	99	26.462	1	NA	NA

## Sheet: PCoA_scores_with_metadata
PCoA1	PCoA2	isolate_id	family	species	colour	umap_cluster	strains	location	patient	age	sex	cancer_type	tumour_location	cancer_stage	smoking_status	genome_size	gc_content	genome_gene_count	mean	sd	group	resistant_level	resistance	group4
-0.327284	-0.0155297	8305AN4	Streptococcus	Strep.BHI_1	#d2691e	4	Strep.BHI_1	Oral cavity	8305	73	Male	Salivary gland cancer	Parotid gland	NA	Nill	1937395	40.3134	1838	2.63299	2.84589	Sensitive	Sensitive	Sensitive	Sensitive √ó Oral cavity
-0.318634	-0.0150906	8305OA4	Streptococcus	Strep.BHI_2	#808080	4	Strep.BHI_2	Oral cavity	8305	73	Male	Salivary gland cancer	Parotid gland	NA	Nill	2091830	40.1881	1962	4.52794	2.10753	Sensitive	Sensitive	Sensitive	Sensitive √ó Oral cavity
-0.2959	-0.013786	8324OA8	Streptococcus	Strep.BHI_3	#c7c7c7	7	Strep.BHI_3	Oral cavity	8324	68	Male	Salivary gland cancer	Parotid gland	T4a - invades skin	Yes	2044010	39.6379	1876	3.1053	1.65478	Sensitive	Sensitive	Sensitive	Sensitive √ó Oral cavity
0.187265	0.0720396	8324OAN8	Streptococcus	Strep. parasanguinis	#ff0000	2	Strep. parasanguinis_B	Oral cavity	8324	68	Male	Salivary gland cancer	Parotid gland	T4a - invades skin	Yes	2133804	42.0732	2124	26.6413	3.18713	Resistant	Low	Resistant	Resistant √ó Oral cavity
0.358402	-0.649628	8355A1	Streptococcus	Strep. salivarius	#9acd32	1	Strep. salivarius_D	Oral cavity	8355	80	Male	Laryngeal cancer	Neck	NA	Never	2235164	39.9198	2006	92.9149	5.40593	Resistant	High	Resistant	Resistant √ó Oral cavity
-0.296703	-0.0112784	8355AN1	Streptococcus	Strep. infantis	#ff1493	7	Strep. infantis_F	Oral cavity	8355	80	Male	Laryngeal cancer	Neck	NA	Never	2059538	39.7056	1869	48.362	4.69316	Resistant	Medium	Resistant	Resistant √ó Oral cavity
0.358379	-0.649814	8355AN2	Streptococcus	Strep. salivarius	#9acd32	1	Strep. salivarius_D	Oral cavity	8355	90	Male	Laryngeal cancer	Neck	NA	Never	2147822	39.7229	1967	81.5103	6.99265	Resistant	High	Resistant	Resistant √ó Oral cavity
-0.293183	-0.00899391	8389O4	Streptococcus	Strep. sp013394695	#6a5acd	7	Strep. sp013394695	Oral cavity	8389	73	Male	Nasopharyngeal cancer	Sinus	NA	Heavy smoker	1829093	39.5687	1771	5.67081	2.33932	Sensitive	Sensitive	Sensitive	Sensitive √ó Oral cavity
-0.3105	-0.00875507	8389S2	Streptococcus	Strep. oralis	#2f4f4f	6	Strep. oralis_AC	Oral cavity	8389	73	Male	Nasopharyngeal cancer	Sinus	NA	Heavy smoker	2037386	40.9778	1971	1.13433	0.875095	Sensitive	Sensitive	Sensitive	Sensitive √ó Oral cavity
0.360322	-0.652077	8389SA4	Streptococcus	Strep. sp001556435	#7cfc00	1	Strep. sp001556435	Oral cavity	8389	73	Male	Nasopharyngeal cancer	Sinus	NA	Heavy smoker	2267952	40.0011	2050	31.7205	3.56575	Resistant	Medium	Resistant	Resistant √ó Oral cavity
0.193177	0.0696705	8408OA3	Streptococcus	Strep. parasanguinis	#ff0000	2	Strep. parasanguinis_D	Oral cavity	8408	88	Male	Laryngeal cancer	Larynx	NA	Nill	2116670	41.7237	1998	47.2963	4.6356	Resistant	Medium	Resistant	Resistant √ó Oral cavity
-0.309007	-0.0214244	8420OA2	Streptococcus	Strep. oralis	#2f4f4f	6	Strep. oralis_S	Oral cavity	8420	67	Male	Laryngeal cancer	Larynx	NA	Nill	2039588	41.0323	1947	33.0553	1.99199	Resistant	Medium	Resistant	Resistant √ó Oral cavity
0.340423	0.292875	8420OA3	Streptococcus	Strep. hominis	#17b99b	3	Strep. hominis	Oral cavity	8420	67	Male	Laryngeal cancer	Larynx	NA	Nill	1869982	39.0479	1768	26.3542	1.88408	Resistant	Low	Resistant	Resistant √ó Oral cavity
0.18799	0.0727541	8421A4	Streptococcus	Strep. parasanguinis	#ff0000	2	Strep. parasanguinis_D	Oral cavity	8421	73	Male	Laryngeal cancer	Glottis	PT4aN0M0	Yes	2063219	41.8209	1970	4.07388	1.77695	Sensitive	Sensitive	Sensitive	Sensitive √ó Oral cavity
0.358984	-0.650859	8421OA3	Streptococcus	Strep. salivarius	#9acd32	1	Strep. salivarius	Oral cavity	8421	73	Male	Laryngeal cancer	Glottis	PT4aN0M0	Yes	2306578	39.8667	2058	69.609	5.04919	Resistant	High	Resistant	Resistant √ó Oral cavity
-0.323084	-0.019372	8431AN1	Streptococcus	Strep. mitis	#f7b6d2	4	Strep. mitis	Oral cavity	8431	41	Male	Oral cancer	Tongue	cT2N0M0	Yes	2107185	39.876	2000	22.3669	1.64645	Resistant	Low	Resistant	Resistant √ó Oral cavity
-0.315308	-0.0151219	8431AN6	Streptococcus	Strep.BHI_4	#ffff00	4	Strep.BHI_4	Oral cavity	8431	41	Male	Oral cancer	Tongue	cT2N0M0	Yes	2098193	39.4759	2006	4.25626	0.694425	Sensitive	Sensitive	Sensitive	Sensitive √ó Oral cavity
-0.297647	-0.0142261	8451AG2	Streptococcus	Strep. infantis	#ff1493	7	Strep. infantis_I	Oral cavity	8451	79	Male	Oral cancer	Tongue	NA	Nill	1707050	39.4984	1633	4.09573	0.909578	Sensitive	Sensitive	Sensitive	Sensitive √ó Oral cavity
0.201227	0.116827	8451ANG2	Streptococcus	Strep. gordonii	#00ced1	5	Strep. gordonii	Oral cavity	8451	79	Male	Oral cancer	Tongue	NA	Nill	2255362	40.3556	2124	25.4433	3.39535	Resistant	Low	Resistant	Resistant √ó Oral cavity
0.1543	0.0951221	8451ANT1	Streptococcus	Strep.BHI_5	#dbdb8d	2	Strep.BHI_5	Tumour	8451	79	Male	Oral cancer	Tongue	NA	Nill	1952892	42.211	1841	42.0974	4.43031	Resistant	Medium	Resistant	Resistant √ó Tumour
-0.296037	-0.00828719	8451ANT4	Streptococcus	Strep. infantis	#ff1493	7	Strep. infantis_M	Tumour	8451	79	Male	Oral cancer	Tongue	NA	Nill	1770353	39.5617	1704	26.8597	3.94688	Resistant	Low	Resistant	Resistant √ó Tumour
-0.297639	-0.0142875	8451AT5	Streptococcus	Strep. infantis	#ff1493	7	Strep. infantis_I	Tumour	8451	79	Male	Oral cancer	Tongue	NA	Nill	1708086	39.5007	1634	27.5933	3.36018	Resistant	Low	Resistant	Resistant √ó Tumour
-0.293475	-0.00823984	8451AT6	Streptococcus	Strep. infantis	#ff1493	7	Strep. infantis_M	Tumour	8451	79	Male	Oral cancer	Tongue	NA	Nill	1804609	39.4682	1688	3.6365	2.47556	Sensitive	Sensitive	Sensitive	Sensitive √ó Tumour
0.182681	0.144698	8451AT7	Streptococcus	Strep. sanguinis	#ff9896	5	Strep. sanguinis_O	Tumour	8451	79	Male	Oral cancer	Tongue	NA	Nill	2448944	42.7511	2336	4.31691	1.77918	Sensitive	Sensitive	Sensitive	Sensitive √ó Tumour
-0.316524	-0.0191018	8451AT8	Streptococcus	Strep.BHI_6	#b6d7a8	4	Strep.BHI_6	Tumour	8451	79	Male	Oral cancer	Tongue	NA	Nill	2107019	39.7829	2029	4.52612	2.27829	Sensitive	Sensitive	Sensitive	Sensitive √ó Tumour
0.200431	0.116705	8451DM12	Streptococcus	Strep. gordonii	#00ced1	5	Strep. gordonii	Tumour	8451	79	Male	Oral cancer	Tongue	NA	Nill	2232141	40.2751	2119	22.8262	4.17444	Resistant	Low	Resistant	Resistant √ó Tumour
-0.299903	-0.0162463	8451DM4	Streptococcus	Strep. oralis	#2f4f4f	6	Strep. oralis	Tumour	8451	79	Male	Oral cancer	Tongue	NA	Nill	2104547	40.756	1952	6.20754	2.11682	Sensitive	Sensitive	Sensitive	Sensitive √ó Tumour
0.337809	0.292066	8451DM8	Streptococcus	Strep. hominis	#17b99b	3	Strep. hominis	Tumour	8451	79	Male	Oral cancer	Tongue	NA	Nill	1942109	38.9547	1810	8.58597	1.2132	Sensitive	Sensitive	Sensitive	Sensitive √ó Tumour
-0.322003	-0.0162501	8451DM9	Streptococcus	Strep. mitis	#f7b6d2	4	Strep. mitis	Tumour	8451	79	Male	Oral cancer	Tongue	NA	Nill	1946573	40.2327	1823	3.26862	1.86499	Sensitive	Sensitive	Sensitive	Sensitive √ó Tumour
0.363775	-0.651504	8457AT2	Streptococcus	Strep. salivarius	#9acd32	1	Strep. salivarius	Tumour	8457	77	Male	Oropharyngeal cancer	Oropharynx	rT4N0M0	Yes	2156028	39.9333	1941	62.8017	3.49421	Resistant	High	Resistant	Resistant √ó Tumour
-0.328011	-0.0202149	8457OAN1	Streptococcus	Strep. sp002238115	#9932cc	4	Strep. sp002238115	Oral cavity	8457	77	Male	Oropharyngeal cancer	Oropharynx	rT4N0M0	Yes	1989117	39.86	1863	9.63313	3.74118	Sensitive	Sensitive	Sensitive	Sensitive √ó Oral cavity
-0.293061	-0.0124593	8457OAN3	Streptococcus	Strep. infantis	#ff1493	7	Strep. infantis_F	Oral cavity	8457	77	Male	Oropharyngeal cancer	Oropharynx	rT4N0M0	Yes	2034800	39.4477	1912	17.2341	2.34975	Resistant	Low	Resistant	Resistant √ó Oral cavity
-0.29287	-0.0123486	8457OAN4	Streptococcus	Strep. infantis	#ff1493	7	Strep. infantis_F	Oral cavity	8457	77	Male	Oropharyngeal cancer	Oropharynx	rT4N0M0	Yes	2048590	39.4878	1922	5.29671	1.03655	Sensitive	Sensitive	Sensitive	Sensitive √ó Oral cavity
0.158779	0.0993229	8468AN4	Streptococcus	Strep. rubneri	#e1b7ff	2	Strep. rubneri	Oral cavity	8468	59	Male	Oral cancer	Mouth	NA	Nill	2120646	41.7464	1987	6.62841	2.54705	Sensitive	Sensitive	Sensitive	Sensitive √ó Oral cavity
0.155274	0.121319	8468DM2	Streptococcus	Strep. cristatus	#0000ff	5	Strep. cristatus_J	Tumour	8468	59	Male	Oral cancer	Mouth	NA	Nill	2187039	41.8515	2131	2.73591	0.871714	Sensitive	Sensitive	Sensitive	Sensitive √ó Tumour
-0.319986	-0.0159917	8468DM31	Streptococcus	Strep.BHI_8	#f65d0a	4	Strep.BHI_8	Tumour	8468	59	Male	Oral cancer	Mouth	NA	Nill	2067415	39.9392	1985	60.4581	7.44054	Resistant	High	Resistant	Resistant √ó Tumour
0.155186	0.0980431	8468OAN1	Streptococcus	Strep. xiaochunlingii	#ffbb78	2	Strep. xiaochunlingii	Oral cavity	8468	59	Male	Oral cancer	Mouth	NA	Nill	2070560	41.8062	2014	33.287	2.81624	Resistant	Medium	Resistant	Resistant √ó Oral cavity
-0.293377	-0.0132855	8468OAN3	Streptococcus	Strep. infantis	#ff1493	7	Strep. infantis_I	Oral cavity	8468	59	Male	Oral cancer	Mouth	NA	Nill	1740778	39.4761	1684	41.343	6.16057	Resistant	Medium	Resistant	Resistant √ó Oral cavity
-0.321145	-0.0189437	8484A3	Streptococcus	Strep. mitis	#f7b6d2	4	Strep. mitis_CD	Oral cavity	8484	64	Male	Laryngeal cancer	Glottis	pT3N2cMx	Yes	2050115	40.0758	1920	5.32266	3.28234	Sensitive	Sensitive	Sensitive	Sensitive √ó Oral cavity
-0.321738	-0.0193795	8484A8	Streptococcus	Strep. mitis	#f7b6d2	4	Strep. mitis_CD	Oral cavity	8484	64	Male	Laryngeal cancer	Glottis	pT3N2cMx	Yes	2049632	40.0637	1904	9.20565	2.1112	Sensitive	Sensitive	Sensitive	Sensitive √ó Oral cavity
-0.322372	-0.0189462	8485A2	Streptococcus	Strep.BHI_9	#660000	4	Strep.BHI_9	Oral cavity	8485	72	Male	Laryngeal cancer	Larynx	pT4aN0Mx	Nill	2022084	39.9668	1896	9.53516	0.880979	Sensitive	Sensitive	Sensitive	Sensitive √ó Oral cavity
0.337638	0.296013	8485AN1	Streptococcus	Strep. hominis	#17b99b	3	Strep. hominis	Oral cavity	8485	72	Male	Laryngeal cancer	Larynx	pT4aN0Mx	Nill	1861519	38.8802	1780	21.8371	3.55428	Resistant	Low	Resistant	Resistant √ó Oral cavity
0.3423	0.294329	8485AN10	Streptococcus	Strep. hominis	#17b99b	3	Strep. hominis	Oral cavity	8485	72	Male	Laryngeal cancer	Larynx	pT4aN0Mx	Nill	1928290	38.9533	1814	18.8993	3.27318	Resistant	Low	Resistant	Resistant √ó Oral cavity
-0.31473	-0.0156374	8485AN4	Streptococcus	Strep. sp901875575	#8000ff	4	Strep. sp901875575	Oral cavity	8485	72	Male	Laryngeal cancer	Larynx	pT4aN0Mx	Nill	1922557	38.6623	1784	15.8871	1.56894	Resistant	Low	Resistant	Resistant √ó Oral cavity
0.184637	0.0692555	8485DM3	Streptococcus	Strep. parasanguinis	#ff0000	2	Strep. parasanguinis_I	Tumour	8485	72	Male	Laryngeal cancer	Larynx	pT4aN0Mx	Nill	2242498	41.7306	2158	23.3434	4.07529	Resistant	Low	Resistant	Resistant √ó Tumour
-0.331162	-0.0148685	8497AN4	Streptococcus	Strep. mitis	#f7b6d2	4	Strep. mitis_CY	Oral cavity	8497	58	Male	Oropharyngeal cancer	Tonsil	pT2pN1	Yes	1840036	40.339	1740	12.4581	1.09556	Resistant	Low	Resistant	Resistant √ó Oral cavity
0.364722	-0.645972	8497OA7	Streptococcus	Strep. salivarius	#9acd32	1	Strep. salivarius_D	Oral cavity	8497	58	Male	Oropharyngeal cancer	Tonsil	pT2pN1	Yes	2243860	39.6815	2052	73.8696	14.2691	Resistant	High	Resistant	Resistant √ó Oral cavity
0.193316	0.0694999	8497OA8	Streptococcus	Strep. parasanguinis	#ff0000	2	Strep. parasanguinis_D	Oral cavity	8497	58	Male	Oropharyngeal cancer	Tonsil	pT2pN1	Yes	2070898	41.7328	1970	25.1333	2.0604	Resistant	Low	Resistant	Resistant √ó Oral cavity
-0.331158	-0.0149318	8498AN14.3	Streptococcus	Strep. mitis	#f7b6d2	4	Strep. mitis_CY	Oral cavity	8498	51	Male	Oral cancer	FOM	pT2N0Mx	Heavy smoker	1835311	40.3439	1742	24.4056	3.73132	Resistant	Low	Resistant	Resistant √ó Oral cavity
0.171606	-0.0445555	8498AN8	Streptococcus	Strep. massiliensis	#db7093	7	Strep. massiliensis	Oral cavity	8498	51	Male	Oral cancer	FOM	pT2N0Mx	Heavy smoker	2041039	41.5169	2029	18.8159	1.69362	Resistant	Low	Resistant	Resistant √ó Oral cavity
-0.302699	-0.0147948	8498OA9	Streptococcus	Strep. oralis	#2f4f4f	6	Strep. oralis_C	Oral cavity	8498	51	Male	Oral cancer	FOM	pT2N0Mx	Heavy smoker	2014768	40.8091	1902	25.6465	3.964	Resistant	Low	Resistant	Resistant √ó Oral cavity
0.338977	0.295044	8507K3	Streptococcus	Strep. anginosus	#1f77b4	3	Strep. anginosus	Oral cavity	8507	58	Female	Oral cancer	FOM	cT3N0	Heavy smoker	1961331	38.686	1915	1.2436	0.572318	Sensitive	Sensitive	Sensitive	Sensitive √ó Oral cavity
0.189879	0.0714748	8507OA5	Streptococcus	Strep. sp001813105	#800080	2	Strep. sp001813105	Oral cavity	8507	58	Female	Oral cancer	FOM	cT3N0	Heavy smoker	2121398	41.9867	1984	24.7862	4.90676	Resistant	Low	Resistant	Resistant √ó Oral cavity
-0.314174	-0.0159359	8507OAN12	Streptococcus	Strep.BHI_8	#f65d0a	4	Strep.BHI_8	Oral cavity	8507	58	Female	Oral cancer	FOM	cT3N0	Heavy smoker	2290060	39.4327	2187	26.3945	1.88145	Resistant	Low	Resistant	Resistant √ó Oral cavity
0.359016	-0.649814	8511A3	Streptococcus	Strep. salivarius	#9acd32	1	Strep. salivarius_D	Oral cavity	8511	76	Female	Oral cancer	Tongue	pT3N0Mx	Heavy smoker	2221993	39.9014	2004	16.0001	2.7434	Resistant	Low	Resistant	Resistant √ó Oral cavity
0.191119	0.0727843	8511A7	Streptococcus	Strep. parasanguinis	#ff0000	2	Strep. parasanguinis	Oral cavity	8511	76	Female	Oral cancer	Tongue	pT3N0Mx	Heavy smoker	2189599	41.7348	1974	72.3002	7.48659	Resistant	High	Resistant	Resistant √ó Oral cavity
-0.305507	-0.0170258	8511A8	Streptococcus	Strep. oralis	#2f4f4f	6	Strep. oralis_BY	Oral cavity	8511	76	Female	Oral cancer	Tongue	pT3N0Mx	Heavy smoker	2046718	41.1837	1920	54.027	4.08996	Resistant	High	Resistant	Resistant √ó Oral cavity
0.339361	0.292102	8511AN11	Streptococcus	Strep. anginosus	#1f77b4	3	Strep. anginosus	Oral cavity	8511	76	Female	Oral cancer	Tongue	pT3N0Mx	Heavy smoker	1915637	38.5137	1845	24.2334	3.49253	Resistant	Low	Resistant	Resistant √ó Oral cavity
0.334318	0.292617	8511AN3	Streptococcus	Strep. hominis	#17b99b	3	Strep. hominis	Oral cavity	8511	76	Female	Oral cancer	Tongue	pT3N0Mx	Heavy smoker	2046162	38.7595	1965	9.32292	1.71643	Sensitive	Sensitive	Sensitive	Sensitive √ó Oral cavity
0.190091	0.0724809	8512A6.2	Streptococcus	Strep. parasanguinis	#ff0000	2	Strep. parasanguinis_F	Oral cavity	8512	57	Male	Oral cancer	Tongue	T4aN2c	Heavy smoker	2123739	41.9322	1979	16.5432	1.31654	Resistant	Low	Resistant	Resistant √ó Oral cavity
-0.32617	-0.0193906	8512A8	Streptococcus	Strep. mitis	#f7b6d2	4	Strep. mitis_BX	Oral cavity	8512	57	Male	Oral cancer	Tongue	T4aN2c	Heavy smoker	2014223	39.9019	1888	25.3285	4.84551	Resistant	Low	Resistant	Resistant √ó Oral cavity
0.343832	0.294062	8512AN2	Streptococcus	Strep. anginosus	#1f77b4	3	Strep. anginosus	Oral cavity	8512	57	Male	Oral cancer	Tongue	T4aN2c	Heavy smoker	1940998	38.9618	1847	8.79432	1.27562	Sensitive	Sensitive	Sensitive	Sensitive √ó Oral cavity
0.342497	0.294258	8512AN4	Streptococcus	Strep. anginosus	#1f77b4	3	Strep. anginosus	Oral cavity	8512	57	Male	Oral cancer	Tongue	T4aN2c	Heavy smoker	1994571	38.8404	1899	3.4613	1.58281	Sensitive	Sensitive	Sensitive	Sensitive √ó Oral cavity
0.204794	0.117267	8513A10	Streptococcus	Strep. gordonii	#00ced1	5	Strep. gordonii	Oral cavity	8513	48	Male	Laryngeal cancer	Glottis	pT3N0Mx	Nill	2180474	40.3756	2065	3.87743	3.19692	Sensitive	Sensitive	Sensitive	Sensitive √ó Oral cavity
-0.31144	-0.0217694	8513A11	Streptococcus	Strep.BHI_10	#ffd700	6	Strep.BHI_10	Oral cavity	8513	48	Male	Laryngeal cancer	Glottis	pT3N0Mx	Nill	1968622	41.0032	1867	49.122	4.58211	Resistant	Medium	Resistant	Resistant √ó Oral cavity
0.336315	0.289705	8513A12	Streptococcus	Strep. constellatus	#00b7eb	3	Strep. constellatus	Oral cavity	8513	48	Male	Laryngeal cancer	Glottis	pT3N0Mx	Nill	1868056	38.0332	1778	18.2632	2.3794	Resistant	Low	Resistant	Resistant √ó Oral cavity
-0.311158	-0.0217936	8513A4	Streptococcus	Strep. oralis	#2f4f4f	6	Strep. oralis_BY	Oral cavity	8513	48	Male	Laryngeal cancer	Glottis	pT3N0Mx	Nill	1976636	40.9959	1869	72.9841	8.51977	Resistant	High	Resistant	Resistant √ó Oral cavity
0.188712	-0.163008	8513A7	Streptococcus	Strep. mutans	#ff00ff	7	Strep. mutans	Oral cavity	8513	48	Male	Laryngeal cancer	Glottis	pT3N0Mx	Nill	2004987	36.9337	1859	56.9936	5.2957	Resistant	High	Resistant	Resistant √ó Oral cavity
-0.329705	-0.015216	8513A9	Streptococcus	Strep. mitis	#f7b6d2	4	Strep. mitis_BZ	Oral cavity	8513	48	Male	Laryngeal cancer	Glottis	pT3N0Mx	Nill	1993432	40.1692	1916	25.6813	2.69928	Resistant	Low	Resistant	Resistant √ó Oral cavity
0.336775	0.289522	8513AN9.2	Streptococcus	Strep. constellatus	#00b7eb	3	Strep. constellatus	Oral cavity	8513	48	Male	Laryngeal cancer	Glottis	pT3N0Mx	Nill	1903393	38.0016	1806	25.7703	5.56434	Resistant	Low	Resistant	Resistant √ó Oral cavity
0.356217	-0.645215	8514A10	Streptococcus	Strep. vestibularis	#b22222	1	Strep. vestibularis	Oral cavity	8514	75	Male	Laryngeal cancer	Glottis	cT4aN2b	Nill	2073618	39.5979	1934	5.73692	1.65187	Sensitive	Sensitive	Sensitive	Sensitive √ó Oral cavity
-0.306152	-0.0122604	8514A11	Streptococcus	Strep. oralis	#2f4f4f	6	Strep. oralis_BW	Oral cavity	8514	75	Male	Laryngeal cancer	Glottis	cT4aN2b	Nill	1861138	41.3561	1743	2.69352	1.09525	Sensitive	Sensitive	Sensitive	Sensitive √ó Oral cavity
0.355903	-0.644872	8514A4	Streptococcus	Strep. vestibularis	#b22222	1	Strep. vestibularis	Oral cavity	8514	75	Male	Laryngeal cancer	Glottis	cT4aN2b	Nill	2002878	39.5293	1880	3.60383	1.67256	Sensitive	Sensitive	Sensitive	Sensitive √ó Oral cavity
0.35424	-0.642825	8514A6	Streptococcus	Strep. vestibularis	#b22222	1	Strep. vestibularis	Oral cavity	8514	75	Male	Laryngeal cancer	Glottis	cT4aN2b	Nill	2057009	39.5036	1950	27.3387	4.3413	Resistant	Low	Resistant	Resistant √ó Oral cavity
0.187735	0.0785337	8514A7	Streptococcus	Strep. caecimuris	#4169e1	2	Strep. caecimuris	Oral cavity	8514	75	Male	Laryngeal cancer	Glottis	cT4aN2b	Nill	2219733	42.0832	2095	76.2982	4.93118	Resistant	High	Resistant	Resistant √ó Oral cavity
0.20024	0.0777682	8514A8	Streptococcus	Strep. parasanguinis	#ff0000	2	Strep. parasanguinis	Oral cavity	8514	75	Male	Laryngeal cancer	Glottis	cT4aN2b	Nill	2250528	41.4755	2055	1.19532	0.583664	Sensitive	Sensitive	Sensitive	Sensitive √ó Oral cavity
0.198444	0.0777966	8514A9	Streptococcus	Strep. parasanguinis	#ff0000	2	Strep. parasanguinis	Oral cavity	8514	75	Male	Laryngeal cancer	Glottis	cT4aN2b	Nill	2342880	41.3158	2164	4.03454	1.52666	Sensitive	Sensitive	Sensitive	Sensitive √ó Oral cavity
0.338541	0.297903	8514AN3	Streptococcus	Strep. hominis	#17b99b	3	Strep. hominis	Oral cavity	8514	75	Male	Laryngeal cancer	Glottis	cT4aN2b	Nill	1879474	38.7398	1773	3.05735	3.13735	Sensitive	Sensitive	Sensitive	Sensitive √ó Oral cavity
-0.307251	-0.0121599	8515A8	Streptococcus	Strep. oralis	#2f4f4f	6	Strep. oralis_BM	Oral cavity	8515	80	Male	Oral cancer	Mandible	T4N0	Never	1995304	40.8402	1928	55.9333	6.3666	Resistant	High	Resistant	Resistant √ó Oral cavity
-0.3124	-0.0155285	8515AN11	Streptococcus	Strep. sp029691405	#9467bd	6	Strep. sp029691405	Oral cavity	8515	80	Male	Oral cancer	Mandible	T4N0	Never	2011507	41.1475	1904	17.1649	2.1343	Resistant	Low	Resistant	Resistant √ó Oral cavity
0.203352	0.117157	8515AN14	Streptococcus	Strep. gordonii	#00ced1	5	Strep. gordonii	Oral cavity	8515	80	Male	Oral cancer	Mandible	T4N0	Never	2278231	40.3596	2217	5.75184	3.09476	Sensitive	Sensitive	Sensitive	Sensitive √ó Oral cavity
0.195606	0.149762	8515AN6	Streptococcus	Strep. sanguinis	#ff9896	5	Strep. sanguinis_A	Oral cavity	8515	80	Male	Oral cancer	Mandible	T4N0	Never	2437257	43.2566	2337	5.24931	2.16678	Sensitive	Sensitive	Sensitive	Sensitive √ó Oral cavity
-0.321612	-0.017825	8524A10	Streptococcus	Strep. mitis	#f7b6d2	4	Strep. mitis	Oral cavity	8524	71	Male	Oral cancer	Tongue	pT2N2bM0	Heavy smoker	1916567	40.1147	1825	6.35767	1.40821	Sensitive	Sensitive	Sensitive	Sensitive √ó Oral cavity
-0.329434	-0.0144468	8524AN5	Streptococcus	Strep. mitis	#f7b6d2	4	Strep. mitis_BX	Oral cavity	8524	71	Male	Oral cancer	Tongue	pT2N2bM0	Heavy smoker	1968138	40.0143	1821	6.55661	2.83296	Sensitive	Sensitive	Sensitive	Sensitive √ó Oral cavity
-0.321653	-0.0178342	8524AN6	Streptococcus	Strep. mitis	#f7b6d2	4	Strep. mitis	Oral cavity	8524	71	Male	Oral cancer	Tongue	pT2N2bM0	Heavy smoker	1942870	40.2094	1827	1.25903	0.691397	Sensitive	Sensitive	Sensitive	Sensitive √ó Oral cavity
0.336495	0.287177	8524AN8	Streptococcus	Strep. constellatus	#00b7eb	3	Strep. constellatus	Oral cavity	8524	81	Male	Oral cancer	Tongue	pT2N2bM0	Heavy smoker	2038119	37.8956	1980	42.5231	3.04489	Resistant	Medium	Resistant	Resistant √ó Oral cavity
-0.327341	-0.0176186	8543A7	Streptococcus	Strep. mitis	#f7b6d2	4	Strep. mitis_BX	Oral cavity	8543	60	Male	Oropharyngeal cancer	Tonsil	NA	Heavy smoker	2000294	40.1019	1892	1.31359	0.611367	Sensitive	Sensitive	Sensitive	Sensitive √ó Oral cavity
0.33909	0.292794	8543AN1	Streptococcus	Strep. anginosus	#1f77b4	3	Strep. anginosus	Oral cavity	8543	60	Male	Oropharyngeal cancer	Tonsil	NA	Heavy smoker	2021633	38.8535	1970	3.56779	2.58649	Sensitive	Sensitive	Sensitive	Sensitive √ó Oral cavity
0.337543	0.28603	8543AN4	Streptococcus	Strep. constellatus	#00b7eb	3	Strep. constellatus	Oral cavity	8543	60	Male	Oropharyngeal cancer	Tonsil	NA	Heavy smoker	1859388	38.0227	1729	2.30889	1.98373	Sensitive	Sensitive	Sensitive	Sensitive √ó Oral cavity
0.340358	0.29267	8607AN3	Streptococcus	Strep. anginosus	#1f77b4	3	Strep. anginosus	Oral cavity	8607	65	Male	Oral cancer	Tongue	T4N1 P16+	Yes	2167350	38.3608	2083	2.79132	2.72688	Sensitive	Sensitive	Sensitive	Sensitive √ó Oral cavity
0.342654	0.291064	8633AN2	Streptococcus	Strep. anginosus	#1f77b4	3	Strep. anginosus	Oral cavity	8633	59	Male	Oral cancer	Tongue	pT3N0Mx	Yes	1953079	39.0028	1871	2.61293	2.18297	Sensitive	Sensitive	Sensitive	Sensitive √ó Oral cavity
-0.305358	-0.0143931	8633AN4	Streptococcus	Strep.BHI_11	#8b4513	4	Strep.BHI_11	Oral cavity	8633	59	Male	Oral cancer	Tongue	pT3N0Mx	Yes	2155448	39.5426	2054	24.0365	3.71801	Resistant	Low	Resistant	Resistant √ó Oral cavity
0.192598	0.125932	8633TD5	Streptococcus	Strep. sinensis	#008000	5	Strep. sinensis	Tumour	8633	59	Male	Oral cancer	Tongue	pT3N0Mx	Yes	2176144	42.1294	2038	20.4559	3.66831	Resistant	Low	Resistant	Resistant √ó Tumour
-0.328621	-0.018223	8676A3	Streptococcus	Strep. mitis	#f7b6d2	4	Strep. mitis_BZ	Oral cavity	8676	61	Female	Oral cancer	Gingivobuccal sulcus	T3N0	Nill	1927314	40.2591	1843	23.2344	3.53382	Resistant	Low	Resistant	Resistant √ó Oral cavity
0.201171	0.113419	8676A7	Streptococcus	Strep. gordonii	#00ced1	5	Strep. gordonii	Oral cavity	8676	61	Female	Oral cancer	Gingivobuccal sulcus	T3N0	Nill	2192399	40.3643	2066	4.67184	1.84136	Sensitive	Sensitive	Sensitive	Sensitive √ó Oral cavity
-0.326296	-0.0216909	8676AN5	Streptococcus	Strep. mitis	#f7b6d2	4	Strep. mitis_BZ	Oral cavity	8676	61	Female	Oral cancer	Gingivobuccal sulcus	T3N0	Nill	1941094	40.2182	1843	20.2556	5.48635	Resistant	Low	Resistant	Resistant √ó Oral cavity
-0.295439	-0.00772575	8676AN8	Streptococcus	Strep. pseudopneumoniae	#32cd32	7	Strep. pseudopneumoniae_N	Oral cavity	8676	61	Female	Oral cancer	Gingivobuccal sulcus	T3N0	Nill	2094957	39.3223	1969	22.8943	2.39317	Resistant	Low	Resistant	Resistant √ó Oral cavity
-0.317685	-0.0175927	8691AN1	Streptococcus	Strep. mitis	#f7b6d2	4	Strep. mitis_AT	Oral cavity	8691	76	Male	Oral cancer	Tongue	pT2N0Mx	Nill	2028049	40.1258	1918	0.981994	1.07952	Sensitive	Sensitive	Sensitive	Sensitive √ó Oral cavity
0.201018	0.114776	8691AN2	Streptococcus	Strep. gordonii	#00ced1	5	Strep. gordonii	Oral cavity	8691	76	Male	Oral cancer	Tongue	pT2N0Mx	Nill	2177003	40.4611	2049	7.92724	2.26888	Sensitive	Sensitive	Sensitive	Sensitive √ó Oral cavity
0.157018	0.101729	8691DM4	Streptococcus	Strep. xiaochunlingii	#ffbb78	2	Strep. xiaochunlingii	Tumour	8691	76	Male	Oral cancer	Tongue	pT2N0Mx	Nill	1948656	42.2023	1879	26.8511	3.70424	Resistant	Low	Resistant	Resistant √ó Tumour
