# Supplementary material
Source: Research Square preprint supplement (doi:10.21203/rs.3.rs-8825984/v1)
Supplement: Supplementary file 6 [file eaabacc62afaf9e68ceea4e0.xlsx]

## Sheet: KEGG_enrichment
category	subcategory	ID	Description	GeneRatio	BgRatio	RichFactor	FoldEnrichment	zScore	pvalue	p.adjust	qvalue	geneID	Count	Group
Metabolism	Global and overview maps	ko01230	Biosynthesis of amino acids	43/260	241/14447	0.178423	9.91416	18.8916	1.07841e-30	1.53135e-28	1.10112e-28	K01914/K01647/K00891/K01624/K02502/K00616/K00147/K00286/K01703/K01807/K04516/K14170/K00872/K00826/K00766/K13497/K01834/K00927/K01817/K01649/K01609/K01439/K01704/K01940/K01714/K01915/K00611/K00600/K00928/K00789/K01754/K01653/K00014/K01693/K00013/K01523/K01814/K11755/K00765/K01687/K00931/K00948/K00615	43	Resistant
Metabolism	Global and overview maps	ko01240	Biosynthesis of cofactors	27/260	380/14447	0.0710526	3.94807	7.88394	1.18493e-09	8.41299e-08	6.04937e-08	K01955/K01598/K13038/K01919/K00940/K00059/K01465/K00867/K07130/K00950/K21977/K00826/K01956/K00226/K17828/K00609/K00287/K00763/K00600/K02823/K01491/K00789/K03148/K00949/K09458/K06215/K00254	27	Resistant
Metabolism	Glycan biosynthesis and metabolism	ko00550	Peptidoglycan biosynthesis	11/260	55/14447	0.2	11.1131	10.1723	3.086e-09	1.46071e-07	1.05032e-07	K01925/K05366/K00687/K12553/K21465/K21466/K18866/K07258/K07260/K12554/K12555	11	Resistant
Metabolism	Amino acid metabolism	ko00290	Valine, leucine and isoleucine biosynthesis	7/260	19/14447	0.368421	20.4715	11.4971	2.36333e-08	8.3898e-07	6.0327e-07	K01703/K00826/K01649/K01704/K01754/K01653/K01687	7	Resistant
Environmental Information Processing	Membrane transport	ko02060	Phosphotransferase system (PTS)	11/260	72/14447	0.152778	8.48916	8.62403	5.94953e-08	1.68967e-06	1.21496e-06	K02796/K02795/K02757/K02800/K02794/K02822/K02821/K02773/K02783/K02781/K02782	11	Resistant
Metabolism	Nucleotide metabolism	ko00240	Pyrimidine metabolism	12/260	114/14447	0.105263	5.84899	7.03639	9.72473e-07	2.30152e-05	1.65491e-05	K01955/K00940/K01465/K01956/K00226/K17828/K01489/K00609/K02823/K01081/K00525/K00254	12	Resistant
Metabolism	Metabolism of cofactors and vitamins	ko00770	Pantothenate and CoA biosynthesis	8/260	45/14447	0.177778	9.87829	8.07494	1.19713e-06	2.42846e-05	1.74619e-05	K01598/K13038/K00867/K21977/K00826/K06133/K01653/K01687	8	Resistant
Metabolism	Nucleotide metabolism	ko00230	Purine metabolism	16/260	224/14447	0.0714286	3.96896	6.06244	3.00651e-06	5.33656e-05	3.83726e-05	K00942/K00940/K01952/K03783/K01835/K01488/K21053/K00951/K01139/K01951/K01129/K01081/K00525/K00948/K01588/K00764	16	Resistant
Metabolism	Energy metabolism	ko00710	Carbon fixation by Calvin cycle	7/260	37/14447	0.189189	10.5124	7.84283	3.6606e-06	5.44803e-05	3.91741e-05	K01624/K00616/K01807/K00927/K01006/K04041/K00615	7	Resistant
Metabolism	Carbohydrate metabolism	ko00010	Glycolysis / Gluconeogenesis	11/260	108/14447	0.101852	5.65944	6.57962	3.83664e-06	5.44803e-05	3.91741e-05	K01223/K01624/K01007/K00845/K01834/K00927/K01835/K01006/K04041/K00016/K00161	11	Resistant
Metabolism	Amino acid metabolism	ko00340	Histidine metabolism	7/260	47/14447	0.148936	8.2757	6.76328	1.91807e-05	0.000247606	0.000178041	K02502/K01693/K00013/K01523/K01814/K11755/K00765	7	Resistant
Metabolism	Carbohydrate metabolism	ko00030	Pentose phosphate pathway	9/260	89/14447	0.101124	5.61897	5.91709	3.12414e-05	0.00036969	0.000265826	K01624/K00616/K01807/K01619/K01835/K04041/K07404/K00948/K00615	9	Resistant
Metabolism	Amino acid metabolism	ko00250	Alanine, aspartate and glutamate metabolism	8/260	70/14447	0.114286	6.35033	6.0745	3.55686e-05	0.000388519	0.000279365	K01914/K01955/K00262/K01956/K01940/K00609/K01915/K00764	8	Resistant
Metabolism	Carbohydrate metabolism	ko00051	Fructose and mannose metabolism	10/260	118/14447	0.0847458	4.70893	5.47642	5.30984e-05	0.000478913	0.000344363	K01795/K01624/K02796/K02795/K02800/K04041/K02794/K02783/K02781/K02782	10	Resistant
Metabolism	Amino acid metabolism	ko00400	Phenylalanine, tyrosine and tryptophan biosynthesis	8/260	74/14447	0.108108	6.00707	5.84576	5.33752e-05	0.000478913	0.000344363	K00891/K04516/K14170/K00766/K13497/K01817/K01609/K00014	8	Resistant
Metabolism	Global and overview maps	ko01200	Carbon metabolism	19/260	377/14447	0.0503979	2.80038	4.79515	5.3962e-05	0.000478913	0.000344363	K01647/K01624/K00626/K00244/K00616/K01007/K00845/K01807/K01834/K00927/K02160/K01006/K00600/K01491/K07404/K01754/K00161/K00948/K00615	19	Resistant
Genetic Information Processing	Translation	ko03010	Ribosome	13/260	201/14447	0.0646766	3.59378	5.01303	7.22058e-05	0.000596109	0.000428633	K02899/K02959/K02992/K02914/K02970/K02913/K02986/K02867/K02902/K02911/K02990/K02956/K02963	13	Resistant
Metabolism	Global and overview maps	ko01232	Nucleotide metabolism	10/260	123/14447	0.0813008	4.51751	5.3036	7.55631e-05	0.000596109	0.000428633	K00942/K00940/K03783/K01489/K01488/K21053/K01951/K01129/K01081/K00525	10	Resistant
Metabolism	Glycan biosynthesis and metabolism	ko00552	Teichoic acid biosynthesis	6/260	41/14447	0.146341	8.13152	6.19038	8.49992e-05	0.000635257	0.000456782	K03367/K14188/K19005/K05946/K03740/K02851	6	Resistant
Cellular Processes	Cellular community - prokaryotes	ko02024	Quorum sensing	15/260	283/14447	0.0530035	2.94516	4.47374	0.000192407	0.00136461	0.000981224	K15583/K07707/K20276/K03106/K20492/K20487/K15580/K07706/K20344/K01635/K01997/K03073/K20345/K12295/K20488	15	Resistant
Metabolism	Global and overview maps	ko01210	2-Oxocarboxylic acid metabolism	9/260	113/14447	0.079646	4.42556	4.94883	0.000201808	0.00136461	0.000981224	K01647/K01703/K00826/K01649/K01704/K00928/K01653/K01687/K00161	9	Resistant
Metabolism	Carbohydrate metabolism	ko00520	Amino sugar and nucleotide sugar metabolism	9/260	117/14447	0.0769231	4.27426	4.81391	0.000262328	0.00169321	0.0012175	K00849/K12373/K02796/K02795/K01784/K00845/K01443/K01835/K02794	9	Resistant
Metabolism	Amino acid metabolism	ko00270	Cysteine and methionine metabolism	9/260	128/14447	0.0703125	3.90694	4.47198	0.000510314	0.00315064	0.00226547	K00558/K01919/K00772/K00872/K00826/K00928/K08968/K00789/K00016	9	Resistant
Metabolism	Carbohydrate metabolism	ko00052	Galactose metabolism	7/260	80/14447	0.0875	4.86197	4.68906	0.000585371	0.00346344	0.00249039	K00849/K01784/K00845/K01835/K01635/K02773/K01190	7	Resistant
Metabolism	Carbohydrate metabolism	ko00500	Starch and sucrose metabolism	8/260	106/14447	0.0754717	4.19361	4.46746	0.000651839	0.00370245	0.00266225	K01223/K00845/K00689/K01835/K00688/K00700/K01176/K01200	8	Resistant
Metabolism	Carbohydrate metabolism	ko00620	Pyruvate metabolism	9/260	134/14447	0.0671642	3.732	4.30114	0.000711466	0.00375658	0.00270118	K01069/K00626/K00244/K01007/K01649/K02160/K01006/K00016/K00161	9	Resistant
Metabolism	Lipid metabolism	ko00061	Fatty acid biosynthesis	5/260	40/14447	0.125	6.94567	5.09753	0.00071428	0.00375658	0.00270118	K00059/K01071/K02160/K00645/K09458	5	Resistant
Metabolism	Amino acid metabolism	ko00220	Arginine biosynthesis	6/260	67/14447	0.0895522	4.976	4.41591	0.00127779	0.00648021	0.0046596	K01955/K00262/K01956/K01940/K01915/K00611	6	Resistant
Human Diseases	Drug resistance: antimicrobial	ko01503	Cationic antimicrobial peptide (CAMP) resistance	5/260	54/14447	0.0925926	5.14494	4.131	0.00279922	0.0137065	0.00985571	K03367/K14188/K03767/K03740/K01448	5	Resistant
Human Diseases	Drug resistance: antimicrobial	ko01501	beta-Lactam resistance	7/260	112/14447	0.0625	3.47284	3.55648	0.00411173	0.0194622	0.0139943	K15583/K05366/K15580/K00687/K12553/K01467/K12555	7	Resistant
Metabolism	Biosynthesis of other secondary metabolites	ko00521	Streptomycin biosynthesis	3/260	21/14447	0.142857	7.93791	4.30706	0.00602914	0.0276173	0.0198583	K00845/K01835/K01092	3	Resistant
Metabolism	Metabolism of cofactors and vitamins	ko00670	One carbon pool by folate	5/260	65/14447	0.0769231	4.27426	3.58159	0.00623348	0.0276611	0.0198897	K00287/K00600/K01491/K00789/K01934	5	Resistant
Metabolism	Glycan biosynthesis and metabolism	ko00511	Other glycan degradation	3/260	22/14447	0.136364	7.5771	4.17929	0.00688941	0.0296453	0.0213165	K01227/K12373/K01190	3	Resistant
NA	NA	ko04981	Folate transport and metabolism	3/260	24/14447	0.125	6.94567	3.94634	0.00881866	0.0368309	0.0264833	K00287/K00600/K01934	3	Resistant
Cellular Processes	Cellular community - prokaryotes	ko02024	Quorum sensing	20/179	283/14447	0.0706714	5.70385	8.95102	3.37348e-10	4.14938e-08	2.91184e-08	K10823/K01626/K12296/K03106/K03110/K01897/K11063/K07706/K02031/K02032/K02035/K15580/K01996/K01997/K01999/K01998/K15581/K15582/K15583/K03217	20	Sensitive
Metabolism	Metabolism of cofactors and vitamins	ko00770	Pantothenate and CoA biosynthesis	9/179	45/14447	0.2	16.1419	11.3945	3.39695e-09	2.08912e-07	1.46605e-07	K00997/K00867/K21977/K01598/K13038/K00859/K06133/K00077/K00826	9	Sensitive
Metabolism	Carbohydrate metabolism	ko00500	Starch and sucrose metabolism	12/179	106/14447	0.113208	9.13692	9.41764	7.23686e-09	2.42982e-07	1.70514e-07	K01176/K02759/K00703/K00700/K00975/K00688/K01223/K05350/K02761/K00845/K01193/K01212	12	Sensitive
Metabolism	Global and overview maps	ko01230	Biosynthesis of amino acids	17/179	241/14447	0.0705394	5.6932	8.22926	7.90185e-09	2.42982e-07	1.70514e-07	K01439/K01735/K01736/K03785/K01626/K00600/K01752/K00031/K00826/K01586/K00651/K01243/K14155/K00850/K00948/K00873/K04517	17	Sensitive
Metabolism	Nucleotide metabolism	ko00240	Pyrimidine metabolism	12/179	114/14447	0.105263	8.49574	8.99947	1.66674e-08	4.10018e-07	2.87732e-07	K01956/K01520/K00526/K00609/K00226/K17828/K00762/K01591/K00857/K00560/K00943/K00761	12	Sensitive
Metabolism	Global and overview maps	ko01240	Biosynthesis of cofactors	20/179	380/14447	0.0526316	4.24787	7.18635	5.19766e-08	1.06552e-06	7.47734e-07	K01956/K00867/K21977/K01598/K13038/K00859/K00059/K00600/K00077/K00826/K00382/K03800/K00858/K00609/K00226/K17828/K00762/K01591/K03151/K21064	20	Sensitive
Metabolism	Global and overview maps	ko01232	Nucleotide metabolism	10/179	123/14447	0.0813008	6.56175	6.93826	2.97162e-06	5.22155e-05	3.66425e-05	K00759/K01520/K01951/K00088/K00364/K00526/K00857/K00560/K00943/K00761	10	Sensitive
Metabolism	Glycan biosynthesis and metabolism	ko00550	Peptidoglycan biosynthesis	7/179	55/14447	0.127273	10.2721	7.71647	4.89877e-06	7.53187e-05	5.28552e-05	K00887/K01000/K00075/K01928/K05362/K05837/K06153	7	Sensitive
Metabolism	Carbohydrate metabolism	ko00010	Glycolysis / Gluconeogenesis	9/179	108/14447	0.0833333	6.72579	6.6897	7.68168e-06	0.000104983	7.36723e-05	K00627/K00162/K01785/K01223/K00016/K00382/K00845/K00850/K00873	9	Sensitive
Genetic Information Processing	Translation	ko00970	Aminoacyl-tRNA biosynthesis	7/179	66/14447	0.106061	8.5601	6.89483	1.67657e-05	0.000206218	0.000144714	K01887/K01893/K01892/K04567/K01874/K01875/K01867	7	Sensitive
Human Diseases	Cancer: overview	ko05230	Central carbon metabolism in cancer	6/179	49/14447	0.122449	9.8828	6.97614	2.98997e-05	0.000334333	0.00023462	K00162/K00031/K00016/K00850/K00873/K00036	6	Sensitive
Metabolism	Global and overview maps	ko01200	Carbon metabolism	15/179	377/14447	0.0397878	3.21125	4.87283	7.16097e-05	0.000734	0.000515088	K00627/K00162/K00600/K00033/K01752/K00031/K00382/K00297/K00845/K00850/K07404/K00948/K00625/K00873/K00036	15	Sensitive
Metabolism	Amino acid metabolism	ko00270	Cysteine and methionine metabolism	8/179	128/14447	0.0625	5.04434	5.14773	0.000191847	0.00181517	0.0012738	K01752/K00558/K00826/K00016/K00651/K01243/K14155/K12960	8	Sensitive
Genetic Information Processing	Folding, sorting and degradation	ko03060	Protein export	5/179	49/14447	0.102041	8.23566	5.68256	0.000338616	0.00297498	0.00208771	K03106/K03110/K03100/K03101/K03217	5	Sensitive
Metabolism	Metabolism of cofactors and vitamins	ko00785	Lipoic acid metabolism	4/179	31/14447	0.129032	10.4141	5.87702	0.000552044	0.00452676	0.00317668	K00627/K00162/K00382/K03800	4	Sensitive
Metabolism	Xenobiotics biodegradation and metabolism	ko00983	Drug metabolism	4/179	32/14447	0.125	10.0887	5.76484	0.000624852	0.00455217	0.00319451	K01520/K01951/K00088/K00857	4	Sensitive
Metabolism	Carbohydrate metabolism	ko00520	Amino sugar and nucleotide sugar metabolism	7/179	117/14447	0.0598291	4.82877	4.65745	0.000629162	0.00455217	0.00319451	K00975/K04042/K01207/K00075/K01443/K02564/K00845	7	Sensitive
Organismal Systems	Endocrine system	ko04922	Glucagon signaling pathway	5/179	57/14447	0.0877193	7.07978	5.15126	0.000686516	0.00469119	0.00329206	K00162/K00688/K00016/K00850/K00873	5	Sensitive
Metabolism	Metabolism of cofactors and vitamins	ko00670	One carbon pool by folate	5/179	65/14447	0.0769231	6.20842	4.71381	0.00125066	0.00809637	0.00568167	K00600/K01934/K00382/K00297/K00560	5	Sensitive
Metabolism	Carbohydrate metabolism	ko00620	Pyruvate metabolism	7/179	134/14447	0.0522388	4.21617	4.18933	0.00139721	0.00859287	0.00603009	K00627/K00162/K01069/K00016/K00382/K00625/K00873	7	Sensitive
Metabolism	Amino acid metabolism	ko00400	Phenylalanine, tyrosine and tryptophan biosynthesis	5/179	74/14447	0.0675676	5.45334	4.30177	0.00223062	0.0130651	0.00916847	K01735/K01736/K03785/K01626/K04517	5	Sensitive
Human Diseases	Drug resistance: antimicrobial	ko01501	beta-Lactam resistance	6/179	112/14447	0.0535714	4.32372	3.95507	0.00269251	0.0150536	0.0105639	K10823/K01207/K15580/K15581/K15582/K15583	6	Sensitive
NA	NA	ko04981	Folate transport and metabolism	3/179	24/14447	0.125	10.0887	4.99112	0.00312581	0.0160761	0.0112815	K00600/K01934/K00560	3	Sensitive
Metabolism	Carbohydrate metabolism	ko00052	Galactose metabolism	5/179	80/14447	0.0625	5.04434	4.06283	0.0031368	0.0160761	0.0112815	K01785/K01220/K00845/K00850/K01193	5	Sensitive
Genetic Information Processing	Translation	ko03010	Ribosome	8/179	201/14447	0.039801	3.21232	3.53768	0.0035969	0.0176967	0.0124188	K02863/K02867/K02884/K02888/K02899/K02914/K02945/K02959	8	Sensitive
Genetic Information Processing	Replication and repair	ko03410	Base excision repair	4/179	53/14447	0.0754717	6.09128	4.15904	0.00415893	0.0196749	0.013807	K10563/K03575/K10773/K01246	4	Sensitive
Metabolism	Carbohydrate metabolism	ko00030	Pentose phosphate pathway	5/179	89/14447	0.0561798	4.53424	3.74596	0.00495502	0.0225729	0.0158406	K00033/K00850/K07404/K00948/K00036	5	Sensitive
Metabolism	Metabolism of other amino acids	ko00450	Selenocompound metabolism	3/179	36/14447	0.0833333	6.72579	3.85264	0.00989328	0.0434598	0.0304981	K01874/K14155/K11717	3	Sensitive
Metabolism	Carbohydrate metabolism	ko00020	Citrate cycle (TCA cycle)	4/179	70/14447	0.0571429	4.61197	3.39295	0.0110748	0.0469725	0.0329632	K00627/K00162/K00031/K00382	4	Sensitive
Genetic Information Processing	Replication and repair	ko03440	Homologous recombination	4/179	72/14447	0.0555556	4.48386	3.31926	0.0121927	0.04999	0.0350807	K02340/K03581/K03629/K03584	4	Sensitive

## Sheet: chord_data
Gene	Group	Annotation	Type
amyA	Sensitive	K01176	KEGG
amyA	Sensitive	G	COG
carA	Sensitive	K01956	KEGG
carA	Sensitive	F	COG
cbpB	Sensitive	S	COG
coaB	Sensitive	K21977	KEGG
coaB	Sensitive	H	COG
def	Sensitive	GO:0003674	GO
def	Sensitive	GO:0003824	GO
def	Sensitive	GO:0008150	GO
def	Sensitive	GO:0008152	GO
def	Sensitive	GO:0009987	GO
def	Sensitive	GO:0016787	GO
def	Sensitive	GO:0016810	GO
def	Sensitive	GO:0016811	GO
def	Sensitive	GO:0018193	GO
def	Sensitive	GO:0018206	GO
def	Sensitive	GO:0019538	GO
def	Sensitive	GO:0031365	GO
def	Sensitive	GO:0036211	GO
def	Sensitive	GO:0042586	GO
def	Sensitive	GO:0043170	GO
def	Sensitive	GO:0043412	GO
def	Sensitive	GO:0043686	GO
def	Sensitive	GO:0044237	GO
def	Sensitive	GO:0044238	GO
def	Sensitive	K01462	KEGG
def	Sensitive	J	COG
dpnI	Sensitive	K01155	KEGG
dpnI	Sensitive	L	COG
dprA	Sensitive	K04096	KEGG
ecfT~~~mtsC~~~cbiQ	Sensitive	K16785	KEGG
ecfT~~~mtsC~~~cbiQ	Sensitive	P	COG
galK	Resistant	GO:0005975	GO
galK	Resistant	GO:0005996	GO
galK	Resistant	GO:0006012	GO
galK	Resistant	GO:0008150	GO
galK	Resistant	GO:0008152	GO
galK	Resistant	GO:0019318	GO
galK	Resistant	GO:0044238	GO
galK	Resistant	GO:0044281	GO
galK	Resistant	K00849	KEGG
galK	Resistant	G	COG
gpmB2	Sensitive	G	COG
guaB	Sensitive	GO:0003674	GO
guaB	Sensitive	GO:0003824	GO
guaB	Sensitive	GO:0003938	GO
guaB	Sensitive	GO:0005575	GO
guaB	Sensitive	GO:0005622	GO
guaB	Sensitive	GO:0005737	GO
guaB	Sensitive	GO:0006139	GO
guaB	Sensitive	GO:0006163	GO
guaB	Sensitive	GO:0006164	GO
guaB	Sensitive	GO:0006183	GO
guaB	Sensitive	GO:0006753	GO
guaB	Sensitive	GO:0006793	GO
guaB	Sensitive	GO:0006796	GO
guaB	Sensitive	GO:0008150	GO
guaB	Sensitive	GO:0008152	GO
guaB	Sensitive	GO:0009058	GO
guaB	Sensitive	GO:0009116	GO
guaB	Sensitive	GO:0009117	GO
guaB	Sensitive	GO:0009119	GO
guaB	Sensitive	GO:0009141	GO
guaB	Sensitive	GO:0009142	GO
guaB	Sensitive	GO:0009144	GO
guaB	Sensitive	GO:0009145	GO
guaB	Sensitive	GO:0009150	GO
guaB	Sensitive	GO:0009152	GO
guaB	Sensitive	GO:0009163	GO
guaB	Sensitive	GO:0009165	GO
guaB	Sensitive	GO:0009199	GO
guaB	Sensitive	GO:0009201	GO
guaB	Sensitive	GO:0009205	GO
guaB	Sensitive	GO:0009206	GO
guaB	Sensitive	GO:0009259	GO
guaB	Sensitive	GO:0009260	GO
guaB	Sensitive	GO:0009987	GO
guaB	Sensitive	GO:0016491	GO
guaB	Sensitive	GO:0016614	GO
guaB	Sensitive	GO:0016616	GO
guaB	Sensitive	GO:0019637	GO
guaB	Sensitive	GO:0019693	GO
guaB	Sensitive	GO:0034404	GO
guaB	Sensitive	GO:0034654	GO
guaB	Sensitive	GO:0042278	GO
guaB	Sensitive	GO:0042451	GO
guaB	Sensitive	GO:0042455	GO
guaB	Sensitive	GO:0044237	GO
guaB	Sensitive	GO:0044238	GO
guaB	Sensitive	GO:0044249	GO
guaB	Sensitive	GO:0044281	GO
guaB	Sensitive	GO:0044283	GO
guaB	Sensitive	GO:0046039	GO
guaB	Sensitive	GO:0046128	GO
guaB	Sensitive	GO:0046129	GO
guaB	Sensitive	GO:0046390	GO
guaB	Sensitive	GO:0055086	GO
guaB	Sensitive	GO:0072521	GO
guaB	Sensitive	GO:0072522	GO
guaB	Sensitive	GO:0090407	GO
guaB	Sensitive	GO:1901068	GO
guaB	Sensitive	GO:1901070	GO
guaB	Sensitive	GO:1901135	GO
guaB	Sensitive	GO:1901137	GO
guaB	Sensitive	GO:1901293	GO
guaB	Sensitive	GO:1901657	GO
guaB	Sensitive	GO:1901659	GO
guaB	Sensitive	K00088	KEGG
guaB	Sensitive	F	COG
holA	Sensitive	K02340	KEGG
holA	Sensitive	L	COG
icd	Sensitive	K00031	KEGG
icd	Sensitive	C	COG
lmrB	Resistant	K18926	KEGG
lysA	Sensitive	K01586	KEGG
lysA	Sensitive	E	COG
metA	Sensitive	GO:0003674	GO
metA	Sensitive	GO:0003824	GO
metA	Sensitive	GO:0008374	GO
metA	Sensitive	GO:0008899	GO
metA	Sensitive	GO:0016740	GO
metA	Sensitive	GO:0016746	GO
metA	Sensitive	GO:0016747	GO
metA	Sensitive	GO:0016748	GO
metA	Sensitive	GO:0016750	GO
metA	Sensitive	K00651	KEGG
metA	Sensitive	E	COG
niaR	Sensitive	K07105	KEGG
niaR	Sensitive	K	COG
panT	Sensitive	S	COG
pezA	Sensitive	K18830	KEGG
pezA	Sensitive	K	COG
pgl	Sensitive	GO:0003674	GO
pgl	Sensitive	GO:0003824	GO
pgl	Sensitive	GO:0005575	GO
pgl	Sensitive	GO:0005622	GO
pgl	Sensitive	GO:0005737	GO
pgl	Sensitive	GO:0005829	GO
pgl	Sensitive	GO:0016787	GO
pgl	Sensitive	GO:0016788	GO
pgl	Sensitive	GO:0017057	GO
pgl	Sensitive	GO:0052689	GO
pgl	Sensitive	K07404	KEGG
pgl	Sensitive	G	COG
ppaX~~~gph	Sensitive	S	COG
racE	Sensitive	GO:0000270	GO
racE	Sensitive	GO:0003674	GO
racE	Sensitive	GO:0003824	GO
racE	Sensitive	GO:0005488	GO
racE	Sensitive	GO:0005515	GO
racE	Sensitive	GO:0006022	GO
racE	Sensitive	GO:0006023	GO
racE	Sensitive	GO:0006024	GO
racE	Sensitive	GO:0008150	GO
racE	Sensitive	GO:0008152	GO
racE	Sensitive	GO:0008881	GO
racE	Sensitive	GO:0009058	GO
racE	Sensitive	GO:0009059	GO
racE	Sensitive	GO:0009252	GO
racE	Sensitive	GO:0009273	GO
racE	Sensitive	GO:0009987	GO
racE	Sensitive	GO:0016853	GO
racE	Sensitive	GO:0016854	GO
racE	Sensitive	GO:0016855	GO
racE	Sensitive	GO:0030203	GO
racE	Sensitive	GO:0036361	GO
racE	Sensitive	GO:0042546	GO
racE	Sensitive	GO:0042802	GO
racE	Sensitive	GO:0043170	GO
racE	Sensitive	GO:0044036	GO
racE	Sensitive	GO:0044038	GO
racE	Sensitive	GO:0044085	GO
racE	Sensitive	GO:0044237	GO
racE	Sensitive	GO:0044249	GO
racE	Sensitive	GO:0047661	GO
racE	Sensitive	GO:0071554	GO
racE	Sensitive	GO:0071840	GO
racE	Sensitive	GO:1901135	GO
racE	Sensitive	GO:1901137	GO
racE	Sensitive	K01776	KEGG
racE	Sensitive	M	COG
recF	Sensitive	GO:0000731	GO
recF	Sensitive	GO:0005575	GO
recF	Sensitive	GO:0005622	GO
recF	Sensitive	GO:0006139	GO
recF	Sensitive	GO:0006259	GO
recF	Sensitive	GO:0006281	GO
recF	Sensitive	GO:0006302	GO
recF	Sensitive	GO:0006950	GO
recF	Sensitive	GO:0006974	GO
recF	Sensitive	GO:0008150	GO
recF	Sensitive	GO:0008152	GO
recF	Sensitive	GO:0009058	GO
recF	Sensitive	GO:0009059	GO
recF	Sensitive	GO:0009295	GO
recF	Sensitive	GO:0009987	GO
recF	Sensitive	GO:0033554	GO
recF	Sensitive	GO:0034654	GO
recF	Sensitive	GO:0043170	GO
recF	Sensitive	GO:0043226	GO
recF	Sensitive	GO:0043228	GO
recF	Sensitive	GO:0043229	GO
recF	Sensitive	GO:0043232	GO
recF	Sensitive	GO:0043590	GO
recF	Sensitive	GO:0044237	GO
recF	Sensitive	GO:0044238	GO
recF	Sensitive	GO:0044249	GO
recF	Sensitive	GO:0050896	GO
recF	Sensitive	GO:0051716	GO
recF	Sensitive	GO:0071897	GO
recF	Sensitive	GO:0090304	GO
recF	Sensitive	K03629	KEGG
recF	Sensitive	L	COG
recX	Sensitive	K03565	KEGG
recX	Sensitive	S	COG
rpmH	Sensitive	GO:0003674	GO
rpmH	Sensitive	GO:0003735	GO
rpmH	Sensitive	GO:0005198	GO
rpmH	Sensitive	GO:0005575	GO
rpmH	Sensitive	GO:0005622	GO
rpmH	Sensitive	GO:0005737	GO
rpmH	Sensitive	GO:0005829	GO
rpmH	Sensitive	GO:0005840	GO
rpmH	Sensitive	GO:0006412	GO
rpmH	Sensitive	GO:0006518	GO
rpmH	Sensitive	GO:0008150	GO
rpmH	Sensitive	GO:0008152	GO
rpmH	Sensitive	GO:0009058	GO
rpmH	Sensitive	GO:0009059	GO
rpmH	Sensitive	GO:0009987	GO
rpmH	Sensitive	GO:0010467	GO
rpmH	Sensitive	GO:0015934	GO
rpmH	Sensitive	GO:0019538	GO
rpmH	Sensitive	GO:0022625	GO
rpmH	Sensitive	GO:0022626	GO
rpmH	Sensitive	GO:0032991	GO
rpmH	Sensitive	GO:0043043	GO
rpmH	Sensitive	GO:0043170	GO
rpmH	Sensitive	GO:0043226	GO
rpmH	Sensitive	GO:0043228	GO
rpmH	Sensitive	GO:0043229	GO
rpmH	Sensitive	GO:0043232	GO
rpmH	Sensitive	GO:0043603	GO
rpmH	Sensitive	GO:0043604	GO
rpmH	Sensitive	GO:0044237	GO
rpmH	Sensitive	GO:0044238	GO
rpmH	Sensitive	GO:0044249	GO
rpmH	Sensitive	GO:0044391	GO
rpmH	Sensitive	GO:1990904	GO
rpmH	Sensitive	K02914	KEGG
rpmH	Sensitive	J	COG
scpA	Sensitive	GO:0003674	GO
scpA	Sensitive	GO:0005488	GO
scpA	Sensitive	GO:0005515	GO
scpA	Sensitive	GO:0042802	GO
scpA	Sensitive	K05896	KEGG
scpA	Sensitive	D	COG
scpB	Sensitive	GO:0003674	GO
scpB	Sensitive	GO:0005488	GO
scpB	Sensitive	GO:0005515	GO
scpB	Sensitive	GO:0042802	GO
scpB	Sensitive	K06024	KEGG
scpB	Sensitive	D	COG
skfE~~~ccmA	Sensitive	K01990	KEGG
skfE~~~ccmA	Sensitive	V	COG
ssnA	Sensitive	K12960	KEGG
ssnA	Sensitive	F	COG
stbD	Resistant	K19159	KEGG
stbD	Resistant	D	COG
trmL~~~trmH	Sensitive	K03216	KEGG
trmL~~~trmH	Sensitive	J	COG
trpS	Sensitive	GO:0003674	GO
trpS	Sensitive	GO:0003824	GO
trpS	Sensitive	GO:0004812	GO
trpS	Sensitive	GO:0004830	GO
trpS	Sensitive	GO:0005575	GO
trpS	Sensitive	GO:0005622	GO
trpS	Sensitive	GO:0005737	GO
trpS	Sensitive	GO:0006082	GO
trpS	Sensitive	GO:0006139	GO
trpS	Sensitive	GO:0006399	GO
trpS	Sensitive	GO:0006412	GO
trpS	Sensitive	GO:0006418	GO
trpS	Sensitive	GO:0006436	GO
trpS	Sensitive	GO:0006518	GO
trpS	Sensitive	GO:0006520	GO
trpS	Sensitive	GO:0008150	GO
trpS	Sensitive	GO:0008152	GO
trpS	Sensitive	GO:0009058	GO
trpS	Sensitive	GO:0009059	GO
trpS	Sensitive	GO:0009987	GO
trpS	Sensitive	GO:0010467	GO
trpS	Sensitive	GO:0016070	GO
trpS	Sensitive	GO:0016874	GO
trpS	Sensitive	GO:0016875	GO
trpS	Sensitive	GO:0019538	GO
trpS	Sensitive	GO:0019752	GO
trpS	Sensitive	GO:0043038	GO
trpS	Sensitive	GO:0043039	GO
trpS	Sensitive	GO:0043043	GO
trpS	Sensitive	GO:0043170	GO
trpS	Sensitive	GO:0043436	GO
trpS	Sensitive	GO:0043603	GO
trpS	Sensitive	GO:0043604	GO
trpS	Sensitive	GO:0044237	GO
trpS	Sensitive	GO:0044238	GO
trpS	Sensitive	GO:0044249	GO
trpS	Sensitive	GO:0044281	GO
trpS	Sensitive	GO:0090304	GO
trpS	Sensitive	GO:0140098	GO
trpS	Sensitive	GO:0140101	GO
trpS	Sensitive	K01867	KEGG
trpS	Sensitive	J	COG
yfdV	Resistant	S	COG
lmrB	Resistant	NA	NA

## Sheet: fisher_genes
Gene	Annotation	resistant_present	sensitive_present	odds_ratio	p_value	FDR	freq_diff	significance
amyA	alpha-amylase;Cytoplasmic alpha-amylase	34	38	0.288212	0.0141636	1	-0.237302	Enriched in Sensitive
carA	carbamoyl phosphate synthase small subunit	35	38	0.310573	0.0243301	1	-0.219444	Enriched in Sensitive
cbpB	cyclic-di-AMP-binding protein CbpB	34	38	0.288212	0.0141636	1	-0.237302	Enriched in Sensitive
coaB	phosphopantothenate--cysteine ligase	9	17	0.319213	0.0211144	1	-0.217063	Enriched in Sensitive
cpsE~~~wcaJ~~~epsL	Galactosyl transferase cpsE;Galactosyl transferase CpsE;Sugar transferase involved in LPS biosynthesis (colanic teichoic acid);Bacterial sugar transferase domain-containing protein;Glycosyl transferase family protein;Sugar transferase;Undecaprenyl-phosphate galactosephosphotransferase;Putative sugar transferase EpsL;Exopolysaccharide biosynthesis polyprenyl glycosylphosphotransferase;Bacterial su…	50	31	3.71268	0.0129083	1	0.203968	Enriched in Resistant
def	peptide deformylase;hypothetical protein;Peptide deformylase	35	38	0.310573	0.0243301	1	-0.219444	Enriched in Sensitive
dpnI	Type II restriction endonuclease DpnI	38	40	0.267244	0.0164172	1	-0.210317	Enriched in Sensitive
dprA	DNA-processing protein DprA	35	39	0.259809	0.00705615	1	-0.241667	Enriched in Sensitive
eamA~~~yicL	Drug/metabolite transporter (DMT) superfamily protein;Membrane protein;EamA domain-containing protein;Putative inner membrane transporter YicL	35	38	0.310573	0.0243301	1	-0.219444	Enriched in Sensitive
ecfT~~~mtsC~~~cbiQ	Energy-coupling factor transporter transmembrane protein EcfT;Cobalt ABC transporter;Transmembrane component MtsC of energizing module of methionine-regulated ECF transporter;Cobalt transport protein;ABC transporter permease protein;ECF-type transporter transmembrane protein EcfT;Cobalamin biosynthesis protein CbiQ;CbiQ family ECF transporter T component;Cobalt ABC transporter permease	29	34	0.351218	0.022453	1	-0.237698	Enriched in Sensitive
galK	galactokinase;Galactokinase;hypothetical protein	19	6	3.2994	0.0208216	1	0.205952	Enriched in Resistant
gpmB2	23-bisphosphoglycerate-dependent phosphoglycerate mutase;putative phosphoglycerate mutase GpmB2;Phosphoglycerate mutase;histidine phosphatase family protein;Putative phosphoglycerate mutase	8	17	0.27825	0.0100897	1	-0.234921	Enriched in Sensitive
group_1027	Ribonuclease P;Sakacin A production response regulator	9	17	0.319213	0.0211144	1	-0.217063	Enriched in Sensitive
group_116	ABC transporter domain-containing protein;ABC transporter ATP-binding protein	22	6	4.14757	0.00398846	1	0.259524	Enriched in Resistant
group_1199	aconitate hydratase AcnA	6	14	0.269347	0.0129083	1	-0.203968	Enriched in Sensitive
group_1200	citrate synthase	6	14	0.269347	0.0129083	1	-0.203968	Enriched in Sensitive
group_123	HTH tetR-type domain-containing protein;hypothetical protein	22	6	4.14757	0.00398846	1	0.259524	Enriched in Resistant
group_1258	SAG1250 family conjugative relaxase;Lantibiotic streptin immunity protein;Lantibiotic streptin immunity protein C-terminal domain-containing protein;Tn5252 relaxase;hypothetical protein;Relaxase/mobilization nuclease family protein;MobA/VirD2-like nuclease domain-containing protein	10	21	0.252164	0.00237347	1	-0.288095	Enriched in Sensitive
group_1414	Txe/YoeB family addiction module toxin	30	12	3.13574	0.00831531	1	0.269048	Enriched in Resistant
group_1460	DNA alkylation repair enzyme;Putative DNA alkylation repair enzyme;hypothetical protein;DNA-7-methylguanine glycosylase	9	17	0.319213	0.0211144	1	-0.217063	Enriched in Sensitive
group_1511	Phosphoglycerate mutase;Histidine phosphatase family protein;histidine phosphatase family protein	8	16	0.305859	0.0181373	1	-0.212698	Enriched in Sensitive
group_15532	TraG P-loop domain-containing protein	8	16	0.305859	0.0181373	1	-0.212698	Enriched in Sensitive
group_15535	Conjugal transfer protein TrbL	8	16	0.305859	0.0181373	1	-0.212698	Enriched in Sensitive
group_15537	Integrative and conjugative element protein	8	16	0.305859	0.0181373	1	-0.212698	Enriched in Sensitive
group_16684	Response regulatory domain-containing protein	19	6	3.2994	0.0208216	1	0.205952	Enriched in Resistant
group_1683	Integrative and conjugative element protein	8	16	0.305859	0.0181373	1	-0.212698	Enriched in Sensitive
group_1786	Plasmid stabilization system protein;Plasmid stabilization system protein RelE/ParE family;Toxin to DNA-damage-inducible protein J;Addiction module toxin RelE/StbE family;Type II toxin-antitoxin system RelE/ParE family toxin	7	15	0.289429	0.0154039	1	-0.208333	Enriched in Sensitive
group_1800	RelB antitoxin;DNA-damage-inducible protein J;type II toxin-antitoxin system RelB/DinJ family antitoxin;RelB antitoxin family protein	7	15	0.289429	0.0154039	1	-0.208333	Enriched in Sensitive
group_18023	CHAP domain containing protein;CHAP domain-containing protein;phage tail tip lysozyme	6	14	0.269347	0.0129083	1	-0.203968	Enriched in Sensitive
group_18024	PrgI family protein	8	16	0.305859	0.0181373	1	-0.212698	Enriched in Sensitive
group_18109	Integrative and conjugative element protein	8	16	0.305859	0.0181373	1	-0.212698	Enriched in Sensitive
group_18492	ABC3 transporter permease protein domain-containing protein;Transmembrane protein Vexp3	19	6	3.2994	0.0208216	1	0.205952	Enriched in Resistant
group_1907	HTH LytTR-type domain-containing protein;LytTR family transcriptional regulator;Autolysis response regulater LytR	23	8	3.18644	0.0165051	1	0.232937	Enriched in Resistant
group_19080	Putative membrane protein (TMS4);Membrane protein (TMS4)	18	5	3.74189	0.0164172	1	0.210317	Enriched in Resistant
group_19305	Type IV secretory system Conjugative DNA transfer family protein;TraM recognition domain-containing protein;TraG/TraD family protein	8	16	0.305859	0.0181373	1	-0.212698	Enriched in Sensitive
group_19583	ABC transporter ATP-binding protein	19	6	3.2994	0.0208216	1	0.205952	Enriched in Resistant
group_19584	histidine kinase;histidine kinase dimerization/phospho-acceptor domain-containing protein;hypothetical protein	19	6	3.2994	0.0208216	1	0.205952	Enriched in Resistant
group_20004	ATPases with chaperone activity ATP-binding subunit	9	17	0.319213	0.0211144	1	-0.217063	Enriched in Sensitive
group_20524	Chemotaxis protein	9	17	0.319213	0.0211144	1	-0.217063	Enriched in Sensitive
group_20550	DEAD/DEAH box helicase family protein;Helicase C-terminal domain-containing protein;Helicase ATP-binding domain-containing protein	8	16	0.305859	0.0181373	1	-0.212698	Enriched in Sensitive
group_20729	NADP-dependent oxidoreductase domain-containing protein;Oxidoreductase aldo/keto reductase family protein;aldo/keto reductase;hypothetical protein	21	5	4.72857	0.00286451	1	0.263889	Enriched in Resistant
group_20844	Pantothenic acid transporter pant;Pantothenic acid transporter PanT;Thiamine transporter protein (Thia_YuaJ)	15	3	5.04798	0.00933675	1	0.20119	Enriched in Resistant
group_20870	Integrative and conjugative element protein	7	17	0.238878	0.00440126	1	-0.252778	Enriched in Sensitive
group_20884	Cell envelope biogenesis protein OmpA	8	16	0.305859	0.0181373	1	-0.212698	Enriched in Sensitive
group_21081	DNA primase;Toprim domain-containing protein	8	17	0.27825	0.0100897	1	-0.234921	Enriched in Sensitive
group_21299	HTH cro/C1-type domain-containing protein	17	4	4.40658	0.0124893	1	0.214683	Enriched in Resistant
group_21362	Aspartyl-tRNA synthetase;Preprotein translocase YajC subunit	17	4	4.40658	0.0124893	1	0.214683	Enriched in Resistant
group_21574	ABC3 transporter permease protein domain-containing protein	22	6	4.14757	0.00398846	1	0.259524	Enriched in Resistant
group_21601	Integrase	4	13	0.19255	0.00626207	1	-0.21746	Enriched in Sensitive
group_21624	Putative phosphoesterase;Calcineurin-like phosphoesterase;Ser/Thr protein phosphatase family;Phosphoesterase;Calcineurin-like phosphoesterase domain-containing protein;Serine/threonine protein phosphatase	9	17	0.319213	0.0211144	1	-0.217063	Enriched in Sensitive
group_2168	carbamoyl-phosphate synthase large subunit;ATP-grasp domain-containing protein	35	38	0.310573	0.0243301	1	-0.219444	Enriched in Sensitive
group_224	ABC superfamily ATP binding cassette transporter ABC protein;ABC transporter domain-containing protein;Putative ABC transporter ATPase	9	17	0.319213	0.0211144	1	-0.217063	Enriched in Sensitive
group_2276	prephenate dehydratase;Prephenate dehydratase	35	38	0.310573	0.0243301	1	-0.219444	Enriched in Sensitive
group_2356	Flavoprotein;NAD(P)/FAD-dependent oxidoreductase;Flavoprotein family protein;NAD(FAD)-utilizing dehydrogenases;Dihydrolipoamide dehydrogenase;putative flavoprotein YhiN	36	39	0.280371	0.0122439	1	-0.22381	Enriched in Sensitive
group_2371	arginine repressor	35	39	0.259809	0.00705615	1	-0.241667	Enriched in Sensitive
group_2379	Mobile element protein;Transposase IS204/IS1001/IS1096/IS1165 DDE domain-containing protein;ISL3 family transposase;transposase;Putative IS1167 transposase;Transposase IS204/IS1001/IS1096/IS1165 zinc-finger domain-containing protein;IS1167 transposase;transposase family protein;Transposase;Insertion element protein	12	20	0.34477	0.0180187	1	-0.230159	Enriched in Sensitive
group_2440	histidine kinase	19	6	3.2994	0.0208216	1	0.205952	Enriched in Resistant
group_2447	DUF2179 domain-containing protein	8	16	0.305859	0.0181373	1	-0.212698	Enriched in Sensitive
group_2510	ATP-binding cassette domain-containing protein;ABC transporter transmembrane domain-containing protein;Putative ABC transporter protein;ABC transporter domain-containing protein;hypothetical protein	7	17	0.238878	0.00440126	1	-0.252778	Enriched in Sensitive
group_2588	DNA-binding protein;DNA helicase	1	13	0.0459439	8.29518e-05	1	-0.271032	Enriched in Sensitive
group_2604	hypothetical protein;Methyltransferase domain-containing protein;Methyltransferase;class I SAM-dependent methyltransferase;Class I SAM-dependent methyltransferase;Ubiquinone/menaquinone biosynthesis C-methylase UbiE/MenG;Methyltransferase type 11	6	17	0.201026	0.0017374	1	-0.270635	Enriched in Sensitive
group_2612	Replication initiation factor;Replication initiation protein;Replication initiation factor family protein	1	13	0.0459439	8.29518e-05	1	-0.271032	Enriched in Sensitive
group_2647	FAD:protein FMN transferase	6	14	0.269347	0.0129083	1	-0.203968	Enriched in Sensitive
group_2654	NADPH-dependent FMN reductase-like domain-containing protein;Uncharacterized conserved protein AF0170 contains SAB hemerythrin HHE and PAS domains;Oxidoreductase;hypothetical protein;NADPH azoreductase	41	42	0.198099	0.00933675	1	-0.20119	Enriched in Sensitive
group_2664	Coenzyme A disulfide reductase;Pyridine nucleotide-disulfide oxidoreductase	13	22	0.319906	0.0111428	1	-0.256746	Enriched in Sensitive
group_2667	HTH cro/C1-type domain-containing protein;Putative transcriptional regulator;DNA-binding protein;DNA-binding helix-turn-helix protein;DNA-binding transcriptional regulator XRE-family HTH domain	36	41	0.178479	0.00195652	1	-0.268254	Enriched in Sensitive
group_2706	DNA-binding response regulator;Response regulator transcription factor;Response regulator;Putative response regulator;Response regulatory domain-containing protein;Response regulator receiver domain protein;hypothetical protein	36	38	0.335155	0.0256468	1	-0.201587	Enriched in Sensitive
group_2759	Rhodanese-like domain protein;Pyridine nucleotide-disulfide oxidoreductase;Rhodanese family protein	21	26	0.442166	0.0475975	1	-0.202778	Enriched in Sensitive
group_2775	DNA-binding response regulator;Putative two-component response transcriptional regulator	9	17	0.319213	0.0211144	1	-0.217063	Enriched in Sensitive
group_2805	Uncharacterized membrane protein;Small multi-drug export protein;Putative small multi-drug export protein;Small multidrug export protein (QacE-like)	19	6	3.2994	0.0208216	1	0.205952	Enriched in Resistant
group_2816	DUF368 domain-containing protein;Integral membrane protein;hypothetical protein	34	39	0.241105	0.00398846	1	-0.259524	Enriched in Sensitive
group_2827	Putative phosphoserine phosphatase 2;Phosphoglycerate mutase;Phosphoglycerate mutase family protein;Phosphoglycerate mutase family 5	9	17	0.319213	0.0211144	1	-0.217063	Enriched in Sensitive
group_2838	helicase-exonuclease AddAB subunit AddA;DNA 3'-5' helicase;PD-(D/E)XK nuclease family protein;ATP-dependent helicase/nuclease subunit A;Recombination helicase AddA;UvrD-helicase domain-containing protein;hypothetical protein	35	39	0.259809	0.00705615	1	-0.241667	Enriched in Sensitive
group_2848	pyruvate phosphate dikinase;Pyruvate phosphate dikinase	13	20	0.381729	0.0327261	1	-0.212302	Enriched in Sensitive
group_2889	ABC transporter substrate-binding protein;Adhesion protein;ABC-type Zn uptake system ZnuABC Zn-binding component ZnuA;Adhesion lipoprotein;High-affinity zinc uptake system binding-protein ZnuA;Metal ABC superfamily ATP binding cassette transporter binding protein;Zinc-binding lipoprotein AdcA putative;zinc-binding lipoprotein AdcAII	33	39	0.224019	0.00359171	1	-0.277381	Enriched in Sensitive
group_2905	Sugar phosphatase YidA;Cof-like hydrolase;Hydroxymethylpyrimidine pyrophosphatase and other HAD family phosphatases;Cof family protein;Putative hydrolase;HAD-IIB family hydrolase;HAD hydrolase family protein	35	39	0.259809	0.00705615	1	-0.241667	Enriched in Sensitive
group_2953	ABC transporter ATP-binding protein;Putative ABC transporter ATP-binding protein	6	15	0.243527	0.00682513	1	-0.22619	Enriched in Sensitive
group_2978	ryptide export MFS transporter;MFS transporter;Transporter major facilitator family protein	15	3	5.04798	0.00933675	1	0.20119	Enriched in Resistant
group_3070	Major facilitator superfamily (MFS) profile domain-containing protein;Transport protein	16	29	0.224362	0.000545933	1	-0.35873	Enriched in Sensitive
group_3103	UPF0154 protein SIR_0372;Conserved uncharacterized protein;Family protein;UPF0154 protein SPN23F18950;UPF0154 protein	34	38	0.288212	0.0141636	1	-0.237302	Enriched in Sensitive
group_3106	Phosphoesterase;putative phosphodiesterase calcineurin family	34	38	0.288212	0.0141636	1	-0.237302	Enriched in Sensitive
group_3113	Alcohol dehydrogenase;GroES-like protein;Zn-dependent alcohol dehydrogenase;NADP-dependent isopropanol dehydrogenase;Alcohol dehydrogenase zinc-binding protein;Threonine dehydrogenase;Zinc-containing alcohol dehydrogenase;Threonine dehydrogenase or related Zn-dependent dehydrogenase;alcohol dehydrogenase catalytic domain-containing protein	50	31	3.71268	0.0129083	1	0.203968	Enriched in Resistant
group_3114	Pseudouridylate synthase RsuA specific for 16S rRNA U516 and 23S rRNA U2605	34	38	0.288212	0.0141636	1	-0.237302	Enriched in Sensitive
group_3119	Trk system potassium transporter TrkA	35	39	0.259809	0.00705615	1	-0.241667	Enriched in Sensitive
group_576	HXXEE domain-containing protein;Membrane protein	15	2	7.73047	0.00290858	1	0.223413	Enriched in Resistant
group_586	Plasmid mobilization relaxosome protein MobC;Bacterial mobilisation domain-containing protein	6	14	0.269347	0.0129083	1	-0.203968	Enriched in Sensitive
group_6989	ABC transporter ATP-binding protein;Putative ABC transporter ATP-binding protein	6	15	0.243527	0.00682513	1	-0.22619	Enriched in Sensitive
group_719	SAG1252 family conjugative relaxosome accessory protein	6	14	0.269347	0.0129083	1	-0.203968	Enriched in Sensitive
group_921	SnoaL-like domain-containing protein;putative SnoaL-like aldol condensation-catalyzing enzyme;SnoaL-like polyketide cyclase domain protein;Polyketide cyclase;Lipoprotein	14	21	0.384775	0.0348263	1	-0.216667	Enriched in Sensitive
guaB	IMP dehydrogenase	35	39	0.259809	0.00705615	1	-0.241667	Enriched in Sensitive
holA	DNA polymerase III subunit delta	35	39	0.259809	0.00705615	1	-0.241667	Enriched in Sensitive
icd	NADP-dependent isocitrate dehydrogenase;hypothetical protein	6	14	0.269347	0.0129083	1	-0.203968	Enriched in Sensitive
lacT~~~bglG	Transcription antiterminator;Transcription antiterminator LacT;Antiterminator protein;PRD domain protein;Transcriptional antiterminator;transcription antiterminator;PRD domain-containing protein	33	36	0.362353	0.0314264	1	-0.210714	Enriched in Sensitive
lmrB	Lincomycin resistance protein lmrB;Major facilitator superfamily (MFS) profile domain-containing protein	15	3	5.04798	0.00933675	1	0.20119	Enriched in Resistant
lysA	Diaminopimelate decarboxylase;Diaminopimelate decarboxylase putative	31	37	0.271677	0.00540818	1	-0.268651	Enriched in Sensitive
lytR~~~cps2a	Cell envelope-related transcriptional attenuator domain-containing protein;Biofilm regulatory protein A;Nucleoside diphosphate kinase;LytR family transcriptional regulator;Anionic cell wall polymer biosynthesis enzyme TagV/TagU LytR-Cps2A-Psr (LCP) family (peptidoglycan teichoic acid transferase);Cell envelope-associated transcriptional attenuator LytR-CpsA-Psr subfamily F2;hypothetical protein	34	38	0.288212	0.0141636	1	-0.237302	Enriched in Sensitive
metA	homoserine O-succinyltransferase	33	38	0.267798	0.00802986	1	-0.255159	Enriched in Sensitive
niaR	Transcription repressor NiaR;DNA-binding protein;Biotin repressor family transcriptional regulator;HTH deoR-type domain-containing protein;DNA-binding transcriptional regulator;hypothetical protein;Transcriptional regulator of NAD metabolism contains HTH and 3H domains	35	39	0.259809	0.00705615	1	-0.241667	Enriched in Sensitive
nupP~~~mglC	ABC transporter permease;ABC-type guanosine uptake system NupNOPQ permease component NupP;Galactoside transport system permease protein MglC;Branched-chain amino acid ABC transporter permease protein;Sugar ABC transporter permease;Putative deoxyribose-specific ABC transporter permease protein;hypothetical protein	38	40	0.267244	0.0164172	1	-0.210317	Enriched in Sensitive
panT	Pantothenic acid transporter pant;Pantothenic acid transporter PanT;ECF transporter S component;Uncharacterized membrane protein;Thiamine transporter protein (Thia_YuaJ)	34	39	0.241105	0.00398846	1	-0.259524	Enriched in Sensitive
pezA	Antitoxin PezA;DNA-binding helix-turn-helix protein;HTH cro/C1-type domain-containing protein	1	12	0.0512742	0.000206295	1	-0.24881	Enriched in Sensitive
pgl	6-phosphogluconolactonase;6-phosphogluconolactonase cycloisomerase 2 family;beta-propeller fold lactonase family protein;3-carboxymuconate cyclase	35	39	0.259809	0.00705615	1	-0.241667	Enriched in Sensitive
ppaX~~~gph	Phosphoglycolate phosphatase;Putative HAD superfamily hydrolase;DNA gyrase subunit B;Hydrolase;Pyrophosphatase PpaX;Phosphoglycolate phosphatase HAD superfamily	35	39	0.259809	0.00705615	1	-0.241667	Enriched in Sensitive
racE	glutamate racemase;Glutamate racemase	34	38	0.288212	0.0141636	1	-0.237302	Enriched in Sensitive
recF	DNA replication/repair protein RecF;DNA replication and repair protein RecF	35	39	0.259809	0.00705615	1	-0.241667	Enriched in Sensitive
recX	recombination regulator RecX	9	17	0.319213	0.0211144	1	-0.217063	Enriched in Sensitive
rpmH	50S ribosomal protein L34;Large ribosomal subunit protein bL34	38	41	0.208996	0.00687158	1	-0.23254	Enriched in Sensitive
scpA	segregation/condensation protein A	34	38	0.288212	0.0141636	1	-0.237302	Enriched in Sensitive
scpB	SMC-Scp complex subunit ScpB;Segregation and condensation protein B	34	38	0.288212	0.0141636	1	-0.237302	Enriched in Sensitive
skfE~~~ccmA	SkfA peptide export ATP-binding protein SkfE;ABC-type multidrug transport system ATPase component;ABC transporter ATP-binding protein;ABC transporter domain-containing protein	36	39	0.280371	0.0122439	1	-0.22381	Enriched in Sensitive
ssnA	TRZ/ATZ family protein;Chlorohydrolase;5-methylthioadenosine/S-adenosylhomocysteine deaminase;Atz/Trz family protein N-terminal truncation;amidohydrolase family protein	32	36	0.336993	0.0190393	1	-0.228571	Enriched in Sensitive
stbD	Antitoxin;Antitoxin component YafN of the YafNO toxin-antitoxin module PHD/YefM family	30	12	3.13574	0.00831531	1	0.269048	Enriched in Resistant
trkH~~~trkG	Cation transport protein;TrkH family potassium uptake protein;Cation uptake protein Trk family;Potassium uptake protein Trk family putative;Potassium uptake protein TrkH;Trk-type K+ transport system membrane component	35	39	0.259809	0.00705615	1	-0.241667	Enriched in Sensitive
trmL~~~trmH	Putative tRNA (cytidine(34)-2'-O)-methyltransferase;tRNA (cytidine(34)-2'-O)-methyltransferase;tRNA(Leu) C34 or U34 (ribose-2'-O)-methylase TrmL contains SPOUT domain;TrmH family RNA methyltransferase	35	39	0.259809	0.00705615	1	-0.241667	Enriched in Sensitive
trpS	tryptophan--tRNA ligase	35	39	0.259809	0.00705615	1	-0.241667	Enriched in Sensitive
wbbJ	Acetyltransferase;Maltose O-acetyltransferase;Acetyltransferase isoleucine patch superfamily;hypothetical protein	37	20	2.41207	0.0431168	1	0.21627	Enriched in Resistant
yfdV	putative permease AEC (auxin efflux carrier) family;Transporter auxin efflux carrier family protein;Auxin efflux carrier;AEC family transporter;hypothetical protein;Malate permease	19	5	4.05342	0.00935941	1	0.228175	Enriched in Resistant
znuA	Zn/Mn ABC transporter;zinc-binding lipoprotein AdcAII;ABC-type Zn uptake system ZnuABC Zn-binding component ZnuA	1	10	0.0651227	0.00212472	1	-0.204365	Enriched in Sensitive

## Sheet: COG_enrichment
COG	count_resistant	count_sensitive	p_value	p_adj	log2FC	EnrichedIn	AbsFold	Description
A	0	2	0.0871992	0.31973	-34.2193	Sensitive	34.2193	RNA processing and modification
C	18	15	0.0529622	0.233034	0.263034	Resistant	0.263034	Energy production and conversion
D	19	12	0.318967	0.659761	0.662965	Resistant	0.662965	Cell cycle control, cell division, chromosome partitioning
E	53	34	0.0523932	0.233034	0.640458	Resistant	0.640458	Amino acid transport and metabolism
F	41	28	0.0433401	0.233034	0.550197	Resistant	0.550197	Nucleotide transport and metabolism
G	60	27	0.808751	1	1.152	Resistant	1.152	Carbohydrate transport and metabolism
H	28	24	0.0123885	0.181698	0.222392	Resistant	0.222392	Coenzyme transport and metabolism
I	17	6	0.821005	1	1.5025	Resistant	1.5025	Lipid transport and metabolism
J	45	36	0.003748	0.0824559	0.321928	Resistant	0.321928	Translation, ribosomal structure and biogenesis
K	83	27	0.277523	0.659761	1.62015	Resistant	1.62015	Transcription
L	91	38	1	1	1.25987	Resistant	1.25987	Replication, recombination and repair
M	59	24	1	1	1.29768	Resistant	1.29768	Cell wall/membrane/envelope biogenesis
N	1	0	1	1	33.2193	Resistant	33.2193	Cell motility
O	4	15	1.06433e-05	0.000468307	-1.90689	Sensitive	1.90689	Posttranslational modification, protein turnover, chaperones
P	36	26	0.0331598	0.233034	0.469485	Resistant	0.469485	Inorganic ion transport and metabolism
Q	7	2	1	1	1.80735	Resistant	1.80735	Secondary metabolites biosynthesis, transport and catabolism
S	248	97	0.545163	0.999465	1.35428	Resistant	1.35428	Function unknown
T	21	8	1	1	1.39232	Resistant	1.39232	Signal transduction mechanisms
U	6	6	0.199264	0.659761	0	Equal	0	Intracellular trafficking, secretion, and vesicular transport
V	41	12	0.287326	0.659761	1.77259	Resistant	1.77259	Defense mechanisms

## Sheet: GO_enrichment
GOs	count_resistant	count_sensitive	p_value	p_adj	log2FC	EnrichedIn	AbsFold	Description	Ontology
GO:0000027	2	1	1	1	1	Resistant	1	ribosomal large subunit assembly	BP
GO:0000028	1	0	1	1	33.2193	Resistant	33.2193	ribosomal small subunit assembly	BP
GO:0000050	5	0	0.331263	0.752643	35.5412	Resistant	35.5412	urea cycle	BP
GO:0000053	1	0	1	1	33.2193	Resistant	33.2193	argininosuccinate metabolic process	BP
GO:0000096	2	0	1	1	34.2193	Resistant	34.2193	sulfur amino acid metabolic process	BP
GO:0000097	1	0	1	1	33.2193	Resistant	33.2193	sulfur amino acid biosynthetic process	BP
GO:0000098	1	0	1	1	33.2193	Resistant	33.2193	sulfur amino acid catabolic process	BP
GO:0000105	4	0	0.580387	1	35.2193	Resistant	35.2193	L-histidine biosynthetic process	BP
GO:0000154	6	3	0.71279	1	1	Resistant	1	rRNA modification	BP
GO:0000162	1	0	1	1	33.2193	Resistant	33.2193	tryptophan biosynthetic process	BP
GO:0000166	4	5	0.0705094	0.557287	-0.321928	Sensitive	0.321928	nucleotide binding	MF
GO:0000270	2	2	0.304295	0.703246	0	Equal	0	peptidoglycan metabolic process	BP
GO:0000271	1	3	0.0657683	0.557287	-1.58496	Sensitive	1.58496	polysaccharide biosynthetic process	BP
GO:0000272	0	1	0.274909	0.682202	-33.2193	Sensitive	33.2193	polysaccharide catabolic process	BP
GO:0000278	0	1	0.274909	0.682202	-33.2193	Sensitive	33.2193	mitotic cell cycle	BP
GO:0000281	0	1	0.274909	0.682202	-33.2193	Sensitive	33.2193	mitotic cytokinesis	BP
GO:0000287	3	0	0.566027	1	34.8042	Resistant	34.8042	magnesium ion binding	MF
GO:0000413	1	0	1	1	33.2193	Resistant	33.2193	protein peptidyl-prolyl isomerization	BP
GO:0000451	0	1	0.274909	0.682202	-33.2193	Sensitive	33.2193	rRNA 2'-O-methylation	BP
GO:0000455	1	0	1	1	33.2193	Resistant	33.2193	enzyme-directed rRNA pseudouridine synthesis	BP
GO:0000470	0	1	0.274909	0.682202	-33.2193	Sensitive	33.2193	maturation of LSU-rRNA	BP
GO:0000731	1	1	0.474347	0.89713	0	Equal	0	DNA synthesis involved in DNA repair	BP
GO:0000774	0	1	0.274909	0.682202	-33.2193	Sensitive	33.2193	adenyl-nucleotide exchange factor activity	MF
GO:0000910	1	1	0.474347	0.89713	0	Equal	0	cytokinesis	BP
GO:0000917	0	1	0.274909	0.682202	-33.2193	Sensitive	33.2193	division septum assembly	BP
GO:0000918	0	1	0.274909	0.682202	-33.2193	Sensitive	33.2193	division septum site selection	BP
GO:0000921	0	1	0.274909	0.682202	-33.2193	Sensitive	33.2193	septin ring assembly	BP
GO:0000966	1	1	0.474347	0.89713	0	Equal	0	RNA 5'-end processing	BP
GO:0000967	1	1	0.474347	0.89713	0	Equal	0	rRNA 5'-end processing	BP
GO:0000976	2	1	1	1	1	Resistant	1	transcription cis-regulatory region binding	MF
GO:0001067	4	1	1	1	2	Resistant	2	transcription regulatory region nucleic acid binding	MF
GO:0001216	2	1	1	1	1	Resistant	1	DNA-binding transcription activator activity	MF
GO:0001217	2	1	1	1	1	Resistant	1	DNA-binding transcription repressor activity	MF
GO:0001510	5	4	0.269787	0.682202	0.321928	Resistant	0.321928	RNA methylation	BP
GO:0001522	1	2	0.185031	0.682202	-1	Sensitive	1	pseudouridine synthesis	BP
GO:0001817	1	0	1	1	33.2193	Resistant	33.2193	regulation of cytokine production	BP
GO:0001819	1	0	1	1	33.2193	Resistant	33.2193	positive regulation of cytokine production	BP
GO:0001882	0	1	0.274909	0.682202	-33.2193	Sensitive	33.2193	nucleoside binding	MF
GO:0001883	0	1	0.274909	0.682202	-33.2193	Sensitive	33.2193	purine nucleoside binding	MF
GO:0002020	1	0	1	1	33.2193	Resistant	33.2193	protease binding	MF
GO:0002161	1	1	0.474347	0.89713	0	Equal	0	aminoacyl-tRNA editing activity	MF
GO:0002791	1	0	1	1	33.2193	Resistant	33.2193	regulation of peptide secretion	BP
GO:0002793	1	0	1	1	33.2193	Resistant	33.2193	positive regulation of peptide secretion	BP
GO:0002949	1	2	0.185031	0.682202	-1	Sensitive	1	tRNA threonylcarbamoyladenosine modification	BP
GO:0003674	99	69	8.80737e-05	0.0088881	0.520832	Resistant	0.520832	molecular_function	MF
GO:0003676	11	5	0.779625	1	1.1375	Resistant	1.1375	nucleic acid binding	MF
GO:0003677	4	2	0.669191	1	1	Resistant	1	DNA binding	MF
GO:0003678	2	0	1	1	34.2193	Resistant	34.2193	DNA helicase activity	MF
GO:0003684	0	1	0.274909	0.682202	-33.2193	Sensitive	33.2193	damaged DNA binding	MF
GO:0003690	2	2	0.304295	0.703246	0	Equal	0	double-stranded DNA binding	MF
GO:0003700	2	1	1	1	1	Resistant	1	DNA-binding transcription factor activity	MF
GO:0003723	7	3	1	1	1.22239	Resistant	1.22239	RNA binding	MF
GO:0003724	1	0	1	1	33.2193	Resistant	33.2193	RNA helicase activity	MF
GO:0003725	1	0	1	1	33.2193	Resistant	33.2193	double-stranded RNA binding	MF
GO:0003729	2	0	1	1	34.2193	Resistant	34.2193	mRNA binding	MF
GO:0003735	8	6	0.229109	0.682202	0.415037	Resistant	0.415037	structural constituent of ribosome	MF
GO:0003746	0	1	0.274909	0.682202	-33.2193	Sensitive	33.2193	translation elongation factor activity	MF
GO:0003755	1	0	1	1	33.2193	Resistant	33.2193	peptidyl-prolyl cis-trans isomerase activity	MF
GO:0003824	77	49	0.00382454	0.115788	0.652077	Resistant	0.652077	catalytic activity	MF
GO:0003844	1	1	0.474347	0.89713	0	Equal	0	1,4-alpha-glucan branching enzyme activity	MF
GO:0003872	0	1	0.274909	0.682202	-33.2193	Sensitive	33.2193	6-phosphofructokinase activity	MF
GO:0003879	1	0	1	1	33.2193	Resistant	33.2193	ATP phosphoribosyltransferase activity	MF
GO:0003887	1	0	1	1	33.2193	Resistant	33.2193	DNA-directed DNA polymerase activity	MF
GO:0003916	1	1	0.474347	0.89713	0	Equal	0	DNA topoisomerase activity	MF
GO:0003918	1	1	0.474347	0.89713	0	Equal	0	DNA topoisomerase type II (double strand cut, ATP-hydrolyzing) activity	MF
GO:0003921	1	1	0.474347	0.89713	0	Equal	0	GMP synthase activity	MF
GO:0003922	1	1	0.474347	0.89713	0	Equal	0	GMP synthase (glutamine-hydrolyzing) activity	MF
GO:0003924	0	2	0.0754708	0.557287	-34.2193	Sensitive	34.2193	GTPase activity	MF
GO:0003938	0	1	0.274909	0.682202	-33.2193	Sensitive	33.2193	IMP dehydrogenase activity	MF
GO:0003951	0	1	0.274909	0.682202	-33.2193	Sensitive	33.2193	NAD+ kinase activity	MF
GO:0003977	0	1	0.274909	0.682202	-33.2193	Sensitive	33.2193	UDP-N-acetylglucosamine diphosphorylase activity	MF
GO:0003984	1	0	1	1	33.2193	Resistant	33.2193	acetolactate synthase activity	MF
GO:0003999	0	1	0.274909	0.682202	-33.2193	Sensitive	33.2193	adenine phosphoribosyltransferase activity	MF
GO:0004016	1	0	1	1	33.2193	Resistant	33.2193	adenylate cyclase activity	MF
GO:0004038	2	0	1	1	34.2193	Resistant	34.2193	allantoinase activity	MF
GO:0004045	1	0	1	1	33.2193	Resistant	33.2193	aminoacyl-tRNA hydrolase activity	MF
GO:0004048	1	0	1	1	33.2193	Resistant	33.2193	anthranilate phosphoribosyltransferase activity	MF
GO:0004055	1	0	1	1	33.2193	Resistant	33.2193	argininosuccinate synthase activity	MF
GO:0004070	1	1	0.474347	0.89713	0	Equal	0	aspartate carbamoyltransferase activity	MF
GO:0004072	1	0	1	1	33.2193	Resistant	33.2193	aspartate kinase activity	MF
GO:0004087	2	0	1	1	34.2193	Resistant	34.2193	carbamoyl-phosphate synthase (ammonia) activity	MF
GO:0004088	2	0	1	1	34.2193	Resistant	34.2193	carbamoyl-phosphate synthase (glutamine-hydrolyzing) activity	MF
GO:0004107	0	1	0.274909	0.682202	-33.2193	Sensitive	33.2193	chorismate synthase activity	MF
GO:0004139	1	0	1	1	33.2193	Resistant	33.2193	deoxyribose-phosphate aldolase activity	MF
GO:0004140	0	1	0.274909	0.682202	-33.2193	Sensitive	33.2193	dephospho-CoA kinase activity	MF
GO:0004152	3	1	1	1	1.58496	Resistant	1.58496	dihydroorotate dehydrogenase activity	MF
GO:0004175	2	0	1	1	34.2193	Resistant	34.2193	endopeptidase activity	MF
GO:0004180	1	0	1	1	33.2193	Resistant	33.2193	carboxypeptidase activity	MF
GO:0004185	1	0	1	1	33.2193	Resistant	33.2193	serine-type carboxypeptidase activity	MF
GO:0004222	1	0	1	1	33.2193	Resistant	33.2193	metalloendopeptidase activity	MF
GO:0004340	2	1	1	1	1	Resistant	1	glucokinase activity	MF
GO:0004350	3	0	0.566027	1	34.8042	Resistant	34.8042	glutamate-5-semialdehyde dehydrogenase activity	MF
GO:0004385	1	0	1	1	33.2193	Resistant	33.2193	guanylate kinase activity	MF
GO:0004386	3	0	0.566027	1	34.8042	Resistant	34.8042	helicase activity	MF
GO:0004396	2	1	1	1	1	Resistant	1	hexokinase activity	MF
GO:0004399	1	0	1	1	33.2193	Resistant	33.2193	histidinol dehydrogenase activity	MF
GO:0004413	1	0	1	1	33.2193	Resistant	33.2193	homoserine kinase activity	MF
GO:0004424	1	0	1	1	33.2193	Resistant	33.2193	imidazoleglycerol-phosphate dehydratase activity	MF
GO:0004425	3	0	0.566027	1	34.8042	Resistant	34.8042	indole-3-glycerol-phosphate synthase activity	MF
GO:0004427	1	1	0.474347	0.89713	0	Equal	0	inorganic diphosphate phosphatase activity	MF
GO:0004477	1	0	1	1	33.2193	Resistant	33.2193	methenyltetrahydrofolate cyclohydrolase activity	MF
GO:0004478	1	0	1	1	33.2193	Resistant	33.2193	methionine adenosyltransferase activity	MF
GO:0004488	1	0	1	1	33.2193	Resistant	33.2193	methylenetetrahydrofolate dehydrogenase (NADP+) activity	MF
GO:0004518	3	3	0.355329	0.78666	0	Equal	0	nuclease activity	MF
GO:0004519	2	3	0.131229	0.682202	-0.584963	Sensitive	0.584963	endonuclease activity	MF
GO:0004521	1	3	0.0657683	0.557287	-1.58496	Sensitive	1.58496	RNA endonuclease activity	MF
GO:0004523	0	2	0.0754708	0.557287	-34.2193	Sensitive	34.2193	RNA-DNA hybrid ribonuclease activity	MF
GO:0004525	1	0	1	1	33.2193	Resistant	33.2193	ribonuclease III activity	MF
GO:0004527	2	0	1	1	34.2193	Resistant	34.2193	exonuclease activity	MF
GO:0004540	1	3	0.0657683	0.557287	-1.58496	Sensitive	1.58496	RNA nuclease activity	MF
GO:0004585	1	0	1	1	33.2193	Resistant	33.2193	ornithine carbamoyltransferase activity	MF
GO:0004590	0	1	0.274909	0.682202	-33.2193	Sensitive	33.2193	orotidine-5'-phosphate decarboxylase activity	MF
GO:0004594	1	1	0.474347	0.89713	0	Equal	0	pantothenate kinase activity	MF
GO:0004618	1	0	1	1	33.2193	Resistant	33.2193	phosphoglycerate kinase activity	MF
GO:0004619	1	0	1	1	33.2193	Resistant	33.2193	phosphoglycerate mutase activity	MF
GO:0004636	1	0	1	1	33.2193	Resistant	33.2193	phosphoribosyl-ATP diphosphatase activity	MF
GO:0004645	0	1	0.274909	0.682202	-33.2193	Sensitive	33.2193	1,4-alpha-oligoglucan phosphorylase activity	MF
GO:0004654	1	0	1	1	33.2193	Resistant	33.2193	polyribonucleotide nucleotidyltransferase activity	MF
GO:0004721	1	0	1	1	33.2193	Resistant	33.2193	phosphoprotein phosphatase activity	MF
GO:0004743	0	1	0.274909	0.682202	-33.2193	Sensitive	33.2193	pyruvate kinase activity	MF
GO:0004764	1	0	1	1	33.2193	Resistant	33.2193	shikimate 3-dehydrogenase (NADP+) activity	MF
GO:0004765	1	0	1	1	33.2193	Resistant	33.2193	shikimate kinase activity	MF
GO:0004797	0	1	0.274909	0.682202	-33.2193	Sensitive	33.2193	thymidine kinase activity	MF
GO:0004798	0	1	0.274909	0.682202	-33.2193	Sensitive	33.2193	thymidylate kinase activity	MF
GO:0004812	1	3	0.0657683	0.557287	-1.58496	Sensitive	1.58496	aminoacyl-tRNA ligase activity	MF
GO:0004814	0	1	0.274909	0.682202	-33.2193	Sensitive	33.2193	arginine-tRNA ligase activity	MF
GO:0004825	0	1	0.274909	0.682202	-33.2193	Sensitive	33.2193	methionine-tRNA ligase activity	MF
GO:0004829	1	0	1	1	33.2193	Resistant	33.2193	threonine-tRNA ligase activity	MF
GO:0004830	0	1	0.274909	0.682202	-33.2193	Sensitive	33.2193	tryptophan-tRNA ligase activity	MF
GO:0004844	1	0	1	1	33.2193	Resistant	33.2193	uracil DNA N-glycosylase activity	MF
GO:0004849	0	1	0.274909	0.682202	-33.2193	Sensitive	33.2193	uridine kinase activity	MF
GO:0005198	8	6	0.229109	0.682202	0.415037	Resistant	0.415037	structural molecule activity	MF
GO:0005215	6	5	0.186735	0.682202	0.263034	Resistant	0.263034	transporter activity	MF
GO:0005345	1	0	1	1	33.2193	Resistant	33.2193	purine nucleobase transmembrane transporter activity	MF
GO:0005363	1	0	1	1	33.2193	Resistant	33.2193	maltose transmembrane transporter activity	MF
GO:0005488	27	19	0.0436761	0.539712	0.50696	Resistant	0.50696	binding	MF
GO:0005515	7	7	0.0717492	0.557287	0	Equal	0	protein binding	MF
GO:0005524	2	1	1	1	1	Resistant	1	ATP binding	MF
GO:0005525	0	1	0.274909	0.682202	-33.2193	Sensitive	33.2193	GTP binding	MF
GO:0005575	94	59	0.00181673	0.0785734	0.671946	Resistant	0.671946	cellular_component	CC
GO:0005576	3	1	1	1	1.58496	Resistant	1.58496	extracellular region	CC
GO:0005618	4	1	1	1	2	Resistant	2	cell wall	CC
GO:0005622	66	43	0.00554074	0.143671	0.618129	Resistant	0.618129	intracellular anatomical structure	CC
GO:0005737	64	38	0.0297831	0.421319	0.752072	Resistant	0.752072	cytoplasm	CC
GO:0005829	28	17	0.128785	0.682202	0.719892	Resistant	0.719892	cytosol	CC
GO:0005840	12	6	0.598339	1	1	Resistant	1	ribosome	CC
GO:0005886	18	12	0.147501	0.682202	0.584963	Resistant	0.584963	plasma membrane	CC
GO:0005948	1	0	1	1	33.2193	Resistant	33.2193	acetolactate synthase complex	CC
GO:0005951	1	0	1	1	33.2193	Resistant	33.2193	carbamoyl-phosphate synthase complex	CC
GO:0005975	8	8	0.0514581	0.557287	0	Equal	0	carbohydrate metabolic process	BP
GO:0005976	1	4	0.0221278	0.37742	-2	Sensitive	2	polysaccharide metabolic process	BP
GO:0005977	1	3	0.0657683	0.557287	-1.58496	Sensitive	1.58496	glycogen metabolic process	BP
GO:0005978	1	2	0.185031	0.682202	-1	Sensitive	1	glycogen biosynthetic process	BP
GO:0005980	0	1	0.274909	0.682202	-33.2193	Sensitive	33.2193	glycogen catabolic process	BP
GO:0005996	2	0	1	1	34.2193	Resistant	34.2193	monosaccharide metabolic process	BP
GO:0006006	1	0	1	1	33.2193	Resistant	33.2193	glucose metabolic process	BP
GO:0006012	1	0	1	1	33.2193	Resistant	33.2193	galactose metabolic process	BP
GO:0006020	1	0	1	1	33.2193	Resistant	33.2193	inositol metabolic process	BP
GO:0006022	2	2	0.304295	0.703246	0	Equal	0	aminoglycan metabolic process	BP
GO:0006023	2	2	0.304295	0.703246	0	Equal	0	aminoglycan biosynthetic process	BP
GO:0006024	2	2	0.304295	0.703246	0	Equal	0	glycosaminoglycan biosynthetic process	BP
GO:0006040	0	1	0.274909	0.682202	-33.2193	Sensitive	33.2193	amino sugar metabolic process	BP
GO:0006066	1	0	1	1	33.2193	Resistant	33.2193	alcohol metabolic process	BP
GO:0006082	23	8	1	1	1.52356	Resistant	1.52356	organic acid metabolic process	BP
GO:0006090	2	2	0.304295	0.703246	0	Equal	0	pyruvate metabolic process	BP
GO:0006091	3	5	0.0402655	0.502696	-0.736966	Sensitive	0.736966	generation of precursor metabolites and energy	BP
GO:0006094	1	0	1	1	33.2193	Resistant	33.2193	gluconeogenesis	BP
GO:0006096	2	2	0.304295	0.703246	0	Equal	0	glycolytic process	BP
GO:0006109	1	0	1	1	33.2193	Resistant	33.2193	regulation of carbohydrate metabolic process	BP
GO:0006112	1	3	0.0657683	0.557287	-1.58496	Sensitive	1.58496	energy reserve metabolic process	BP
GO:0006116	0	2	0.0754708	0.557287	-34.2193	Sensitive	34.2193	NADH oxidation	BP
GO:0006139	34	38	4.86355e-06	0.00339317	-0.160465	Sensitive	0.160465	nucleobase-containing compound metabolic process	BP
GO:0006140	1	0	1	1	33.2193	Resistant	33.2193	regulation of nucleotide metabolic process	BP
GO:0006144	2	1	1	1	1	Resistant	1	purine nucleobase metabolic process	BP
GO:0006145	2	0	1	1	34.2193	Resistant	34.2193	purine nucleobase catabolic process	BP
GO:0006163	6	7	0.0546267	0.557287	-0.222392	Sensitive	0.222392	purine nucleotide metabolic process	BP
GO:0006164	4	6	0.030964	0.421319	-0.584963	Sensitive	0.584963	purine nucleotide biosynthetic process	BP
GO:0006168	0	1	0.274909	0.682202	-33.2193	Sensitive	33.2193	adenine salvage	BP
GO:0006177	1	1	0.474347	0.89713	0	Equal	0	GMP biosynthetic process	BP
GO:0006183	0	1	0.274909	0.682202	-33.2193	Sensitive	33.2193	GTP biosynthetic process	BP
GO:0006195	1	0	1	1	33.2193	Resistant	33.2193	purine nucleotide catabolic process	BP
GO:0006203	1	0	1	1	33.2193	Resistant	33.2193	dGTP catabolic process	BP
GO:0006206	2	3	0.131229	0.682202	-0.584963	Sensitive	0.584963	pyrimidine nucleobase metabolic process	BP
GO:0006207	2	2	0.304295	0.703246	0	Equal	0	'de novo' pyrimidine nucleobase biosynthetic process	BP
GO:0006213	0	2	0.0754708	0.557287	-34.2193	Sensitive	34.2193	pyrimidine nucleoside metabolic process	BP
GO:0006220	2	4	0.0520279	0.557287	-1	Sensitive	1	pyrimidine nucleotide metabolic process	BP
GO:0006221	2	4	0.0520279	0.557287	-1	Sensitive	1	pyrimidine nucleotide biosynthetic process	BP
GO:0006222	0	1	0.274909	0.682202	-33.2193	Sensitive	33.2193	UMP biosynthetic process	BP
GO:0006227	0	1	0.274909	0.682202	-33.2193	Sensitive	33.2193	dUDP biosynthetic process	BP
GO:0006233	0	1	0.274909	0.682202	-33.2193	Sensitive	33.2193	dTDP biosynthetic process	BP
GO:0006235	0	1	0.274909	0.682202	-33.2193	Sensitive	33.2193	dTTP biosynthetic process	BP
GO:0006259	6	7	0.0546267	0.557287	-0.222392	Sensitive	0.222392	DNA metabolic process	BP
GO:0006260	2	2	0.304295	0.703246	0	Equal	0	DNA replication	BP
GO:0006261	2	2	0.304295	0.703246	0	Equal	0	DNA-templated DNA replication	BP
GO:0006265	1	1	0.474347	0.89713	0	Equal	0	DNA topological change	BP
GO:0006268	1	0	1	1	33.2193	Resistant	33.2193	DNA unwinding involved in DNA replication	BP
GO:0006270	1	0	1	1	33.2193	Resistant	33.2193	DNA replication initiation	BP
GO:0006271	0	2	0.0754708	0.557287	-34.2193	Sensitive	34.2193	DNA strand elongation involved in DNA replication	BP
GO:0006273	0	2	0.0754708	0.557287	-34.2193	Sensitive	34.2193	lagging strand elongation	BP
GO:0006275	0	1	0.274909	0.682202	-33.2193	Sensitive	33.2193	regulation of DNA replication	BP
GO:0006281	5	5	0.14987	0.682202	0	Equal	0	DNA repair	BP
GO:0006284	1	0	1	1	33.2193	Resistant	33.2193	base-excision repair	BP
GO:0006285	1	0	1	1	33.2193	Resistant	33.2193	base-excision repair, AP site formation	BP
GO:0006298	0	3	0.0206904	0.373972	-34.8042	Sensitive	34.8042	mismatch repair	BP
GO:0006302	3	2	0.619705	1	0.584963	Resistant	0.584963	double-strand break repair	BP
GO:0006310	2	0	1	1	34.2193	Resistant	34.2193	DNA recombination	BP
GO:0006355	6	2	1	1	1.58496	Resistant	1.58496	regulation of DNA-templated transcription	BP
GO:0006364	7	5	0.328985	0.752643	0.485427	Resistant	0.485427	rRNA processing	BP
GO:0006396	9	12	0.00497271	0.136862	-0.415037	Sensitive	0.415037	RNA processing	BP
GO:0006399	4	11	0.000274911	0.0192822	-1.45943	Sensitive	1.45943	tRNA metabolic process	BP
GO:0006400	2	6	0.00696441	0.175706	-1.58496	Sensitive	1.58496	tRNA modification	BP
GO:0006401	1	2	0.185031	0.682202	-1	Sensitive	1	RNA catabolic process	BP
GO:0006402	1	0	1	1	33.2193	Resistant	33.2193	mRNA catabolic process	BP
GO:0006412	6	8	0.0291569	0.421319	-0.415037	Sensitive	0.415037	translation	BP
GO:0006414	0	1	0.274909	0.682202	-33.2193	Sensitive	33.2193	translational elongation	BP
GO:0006417	2	0	1	1	34.2193	Resistant	34.2193	regulation of translation	BP
GO:0006418	1	3	0.0657683	0.557287	-1.58496	Sensitive	1.58496	tRNA aminoacylation for protein translation	BP
GO:0006420	0	1	0.274909	0.682202	-33.2193	Sensitive	33.2193	arginyl-tRNA aminoacylation	BP
GO:0006431	0	1	0.274909	0.682202	-33.2193	Sensitive	33.2193	methionyl-tRNA aminoacylation	BP
GO:0006435	1	0	1	1	33.2193	Resistant	33.2193	threonyl-tRNA aminoacylation	BP
GO:0006436	0	1	0.274909	0.682202	-33.2193	Sensitive	33.2193	tryptophanyl-tRNA aminoacylation	BP
GO:0006448	1	0	1	1	33.2193	Resistant	33.2193	regulation of translational elongation	BP
GO:0006450	2	1	1	1	1	Resistant	1	regulation of translational fidelity	BP
GO:0006465	1	0	1	1	33.2193	Resistant	33.2193	signal peptide processing	BP
GO:0006470	1	0	1	1	33.2193	Resistant	33.2193	protein dephosphorylation	BP
GO:0006508	5	1	1	1	2.32193	Resistant	2.32193	proteolysis	BP
GO:0006518	7	8	0.0377754	0.502696	-0.192645	Sensitive	0.192645	peptide metabolic process	BP
GO:0006520	19	5	0.645726	1	1.926	Resistant	1.926	amino acid metabolic process	BP
GO:0006525	5	0	0.331263	0.752643	35.5412	Resistant	35.5412	arginine metabolic process	BP
GO:0006526	5	0	0.331263	0.752643	35.5412	Resistant	35.5412	L-arginine biosynthetic process	BP
GO:0006541	1	0	1	1	33.2193	Resistant	33.2193	glutamine metabolic process	BP
GO:0006542	1	0	1	1	33.2193	Resistant	33.2193	glutamine biosynthetic process	BP
GO:0006547	4	0	0.580387	1	35.2193	Resistant	35.2193	L-histidine metabolic process	BP
GO:0006549	1	0	1	1	33.2193	Resistant	33.2193	isoleucine metabolic process	BP
GO:0006553	1	0	1	1	33.2193	Resistant	33.2193	lysine metabolic process	BP
GO:0006555	1	0	1	1	33.2193	Resistant	33.2193	methionine metabolic process	BP
GO:0006566	3	0	0.566027	1	34.8042	Resistant	34.8042	threonine metabolic process	BP
GO:0006568	1	0	1	1	33.2193	Resistant	33.2193	tryptophan metabolic process	BP
GO:0006570	0	1	0.274909	0.682202	-33.2193	Sensitive	33.2193	tyrosine metabolic process	BP
GO:0006571	0	1	0.274909	0.682202	-33.2193	Sensitive	33.2193	tyrosine biosynthetic process	BP
GO:0006573	1	0	1	1	33.2193	Resistant	33.2193	valine metabolic process	BP
GO:0006575	2	1	1	1	1	Resistant	1	cellular modified amino acid metabolic process	BP
GO:0006576	1	0	1	1	33.2193	Resistant	33.2193	biogenic amine metabolic process	BP
GO:0006586	1	0	1	1	33.2193	Resistant	33.2193	indolalkylamine metabolic process	BP
GO:0006591	1	0	1	1	33.2193	Resistant	33.2193	ornithine metabolic process	BP
GO:0006629	1	2	0.185031	0.682202	-1	Sensitive	1	lipid metabolic process	BP
GO:0006644	1	1	0.474347	0.89713	0	Equal	0	phospholipid metabolic process	BP
GO:0006730	2	1	1	1	1	Resistant	1	one-carbon metabolic process	BP
GO:0006734	0	2	0.0754708	0.557287	-34.2193	Sensitive	34.2193	NADH metabolic process	BP
GO:0006739	0	1	0.274909	0.682202	-33.2193	Sensitive	33.2193	NADP metabolic process	BP
GO:0006741	0	1	0.274909	0.682202	-33.2193	Sensitive	33.2193	NADP biosynthetic process	BP
GO:0006753	10	13	0.00358349	0.1142	-0.378512	Sensitive	0.378512	nucleoside phosphate metabolic process	BP
GO:0006754	2	2	0.304295	0.703246	0	Equal	0	ATP biosynthetic process	BP
GO:0006760	1	1	0.474347	0.89713	0	Equal	0	folic acid-containing compound metabolic process	BP
GO:0006766	0	1	0.274909	0.682202	-33.2193	Sensitive	33.2193	vitamin metabolic process	BP
GO:0006767	0	1	0.274909	0.682202	-33.2193	Sensitive	33.2193	water-soluble vitamin metabolic process	BP
GO:0006769	0	1	0.274909	0.682202	-33.2193	Sensitive	33.2193	nicotinamide metabolic process	BP
GO:0006790	2	0	1	1	34.2193	Resistant	34.2193	sulfur compound metabolic process	BP
GO:0006793	19	17	0.0128071	0.260826	0.160465	Resistant	0.160465	phosphorus metabolic process	BP
GO:0006796	18	16	0.0180842	0.347618	0.169925	Resistant	0.169925	phosphate-containing compound metabolic process	BP
GO:0006810	6	5	0.186735	0.682202	0.263034	Resistant	0.263034	transport	BP
GO:0006811	1	3	0.0657683	0.557287	-1.58496	Sensitive	1.58496	monoatomic ion transport	BP
GO:0006812	0	1	0.274909	0.682202	-33.2193	Sensitive	33.2193	monoatomic cation transport	BP
GO:0006820	1	2	0.185031	0.682202	-1	Sensitive	1	monoatomic anion transport	BP
GO:0006855	1	1	0.474347	0.89713	0	Equal	0	xenobiotic transmembrane transport	BP
GO:0006863	1	0	1	1	33.2193	Resistant	33.2193	purine nucleobase transport	BP
GO:0006950	6	7	0.0546267	0.557287	-0.222392	Sensitive	0.222392	response to stress	BP
GO:0006970	0	1	0.274909	0.682202	-33.2193	Sensitive	33.2193	response to osmotic stress	BP
GO:0006974	5	5	0.14987	0.682202	0	Equal	0	DNA damage response	BP
GO:0006996	6	3	0.71279	1	1	Resistant	1	organelle organization	BP
GO:0007010	0	1	0.274909	0.682202	-33.2193	Sensitive	33.2193	cytoskeleton organization	BP
GO:0007049	1	1	0.474347	0.89713	0	Equal	0	cell cycle	BP
GO:0007059	1	1	0.474347	0.89713	0	Equal	0	chromosome segregation	BP
GO:0007154	1	0	1	1	33.2193	Resistant	33.2193	cell communication	BP
GO:0007165	1	0	1	1	33.2193	Resistant	33.2193	signal transduction	BP
GO:0008033	2	7	0.00241146	0.0873573	-1.80735	Sensitive	1.80735	tRNA processing	BP
GO:0008094	3	2	0.619705	1	0.584963	Resistant	0.584963	ATP-dependent activity, acting on DNA	MF
GO:0008135	0	1	0.274909	0.682202	-33.2193	Sensitive	33.2193	translation factor activity, RNA binding	MF
GO:0008150	99	74	6.51646e-06	0.00339317	0.419903	Resistant	0.419903	biological_process	BP
GO:0008152	79	59	6.50188e-05	0.00715798	0.421138	Resistant	0.421138	metabolic process	BP
GO:0008156	0	1	0.274909	0.682202	-33.2193	Sensitive	33.2193	negative regulation of DNA replication	BP
GO:0008168	6	4	0.476346	0.89713	0.584963	Resistant	0.584963	methyltransferase activity	MF
GO:0008170	4	2	0.669191	1	1	Resistant	1	N-methyltransferase activity	MF
GO:0008173	5	3	0.691876	1	0.736966	Resistant	0.736966	RNA methyltransferase activity	MF
GO:0008175	1	1	0.474347	0.89713	0	Equal	0	tRNA methyltransferase activity	MF
GO:0008184	0	1	0.274909	0.682202	-33.2193	Sensitive	33.2193	glycogen phosphorylase activity	MF
GO:0008186	1	0	1	1	33.2193	Resistant	33.2193	ATP-dependent activity, acting on RNA	MF
GO:0008194	1	0	1	1	33.2193	Resistant	33.2193	UDP-glycosyltransferase activity	MF
GO:0008233	4	0	0.580387	1	35.2193	Resistant	35.2193	peptidase activity	MF
GO:0008234	1	0	1	1	33.2193	Resistant	33.2193	cysteine-type peptidase activity	MF
GO:0008236	1	0	1	1	33.2193	Resistant	33.2193	serine-type peptidase activity	MF
GO:0008237	1	0	1	1	33.2193	Resistant	33.2193	metallopeptidase activity	MF
GO:0008238	1	0	1	1	33.2193	Resistant	33.2193	exopeptidase activity	MF
GO:0008324	0	1	0.274909	0.682202	-33.2193	Sensitive	33.2193	monoatomic cation transmembrane transporter activity	MF
GO:0008360	2	0	1	1	34.2193	Resistant	34.2193	regulation of cell shape	BP
GO:0008374	1	1	0.474347	0.89713	0	Equal	0	O-acyltransferase activity	MF
GO:0008409	1	0	1	1	33.2193	Resistant	33.2193	5'-3' exonuclease activity	MF
GO:0008443	0	1	0.274909	0.682202	-33.2193	Sensitive	33.2193	phosphofructokinase activity	MF
GO:0008509	1	2	0.185031	0.682202	-1	Sensitive	1	monoatomic anion transmembrane transporter activity	MF
GO:0008514	1	1	0.474347	0.89713	0	Equal	0	organic anion transmembrane transporter activity	MF
GO:0008519	0	1	0.274909	0.682202	-33.2193	Sensitive	33.2193	ammonium channel activity	MF
GO:0008610	1	2	0.185031	0.682202	-1	Sensitive	1	lipid biosynthetic process	BP
GO:0008616	1	1	0.474347	0.89713	0	Equal	0	queuosine biosynthetic process	BP
GO:0008643	2	0	1	1	34.2193	Resistant	34.2193	carbohydrate transport	BP
GO:0008649	5	2	1	1	1.32193	Resistant	1.32193	rRNA methyltransferase activity	MF
GO:0008652	15	2	0.179467	0.682202	2.90689	Resistant	2.90689	amino acid biosynthetic process	BP
GO:0008653	0	1	0.274909	0.682202	-33.2193	Sensitive	33.2193	lipopolysaccharide metabolic process	BP
GO:0008654	1	1	0.474347	0.89713	0	Equal	0	phospholipid biosynthetic process	BP
GO:0008655	0	1	0.274909	0.682202	-33.2193	Sensitive	33.2193	pyrimidine-containing compound salvage	BP
GO:0008728	0	1	0.274909	0.682202	-33.2193	Sensitive	33.2193	GTP diphosphokinase activity	MF
GO:0008745	1	0	1	1	33.2193	Resistant	33.2193	N-acetylmuramoyl-L-alanine amidase activity	MF
GO:0008757	6	4	0.476346	0.89713	0.584963	Resistant	0.584963	S-adenosylmethionine-dependent methyltransferase activity	MF
GO:0008808	1	1	0.474347	0.89713	0	Equal	0	cardiolipin synthase activity	MF
GO:0008832	1	0	1	1	33.2193	Resistant	33.2193	dGTPase activity	MF
GO:0008881	0	1	0.274909	0.682202	-33.2193	Sensitive	33.2193	glutamate racemase activity	MF
GO:0008893	0	1	0.274909	0.682202	-33.2193	Sensitive	33.2193	guanosine-3',5'-bis(diphosphate) 3'-diphosphatase activity	MF
GO:0008899	0	1	0.274909	0.682202	-33.2193	Sensitive	33.2193	homoserine O-succinyltransferase activity	MF
GO:0008934	1	0	1	1	33.2193	Resistant	33.2193	inositol monophosphate 1-phosphatase activity	MF
GO:0008976	0	1	0.274909	0.682202	-33.2193	Sensitive	33.2193	polyphosphate kinase activity	MF
GO:0008977	0	1	0.274909	0.682202	-33.2193	Sensitive	33.2193	prephenate dehydrogenase (NAD+) activity	MF
GO:0008990	2	0	1	1	34.2193	Resistant	34.2193	rRNA (guanine-N2-)-methyltransferase activity	MF
GO:0009002	1	0	1	1	33.2193	Resistant	33.2193	serine-type D-Ala-D-Ala carboxypeptidase activity	MF
GO:0009011	0	1	0.274909	0.682202	-33.2193	Sensitive	33.2193	alpha-1,4-glucan glucosyltransferase (ADP-glucose donor) activity	MF
GO:0009041	0	1	0.274909	0.682202	-33.2193	Sensitive	33.2193	UMP/dUMP kinase activity	MF
GO:0009056	10	5	0.572055	1	1	Resistant	1	catabolic process	BP
GO:0009057	1	3	0.0657683	0.557287	-1.58496	Sensitive	1.58496	macromolecule catabolic process	BP
GO:0009058	43	34	0.00156307	0.072803	0.338802	Resistant	0.338802	biosynthetic process	BP
GO:0009059	12	15	0.0019725	0.0796232	-0.321928	Sensitive	0.321928	macromolecule biosynthetic process	BP
GO:0009063	1	0	1	1	33.2193	Resistant	33.2193	amino acid catabolic process	BP
GO:0009064	6	0	0.196927	0.682202	35.8042	Resistant	35.8042	glutamine family amino acid metabolic process	BP
GO:0009066	4	0	0.580387	1	35.2193	Resistant	35.2193	aspartate family amino acid metabolic process	BP
GO:0009067	2	0	1	1	34.2193	Resistant	34.2193	aspartate family amino acid biosynthetic process	BP
GO:0009069	1	0	1	1	33.2193	Resistant	33.2193	serine family amino acid metabolic process	BP
GO:0009072	2	2	0.304295	0.703246	0	Equal	0	aromatic amino acid metabolic process	BP
GO:0009073	2	2	0.304295	0.703246	0	Equal	0	aromatic amino acid family biosynthetic process	BP
GO:0009081	1	0	1	1	33.2193	Resistant	33.2193	branched-chain amino acid metabolic process	BP
GO:0009082	1	0	1	1	33.2193	Resistant	33.2193	branched-chain amino acid biosynthetic process	BP
GO:0009084	6	0	0.196927	0.682202	35.8042	Resistant	35.8042	glutamine family amino acid biosynthetic process	BP
GO:0009085	1	0	1	1	33.2193	Resistant	33.2193	lysine biosynthetic process	BP
GO:0009086	1	0	1	1	33.2193	Resistant	33.2193	methionine biosynthetic process	BP
GO:0009088	1	0	1	1	33.2193	Resistant	33.2193	threonine biosynthetic process	BP
GO:0009089	1	0	1	1	33.2193	Resistant	33.2193	lysine biosynthetic process via diaminopimelate	BP
GO:0009092	1	0	1	1	33.2193	Resistant	33.2193	homoserine metabolic process	BP
GO:0009095	0	1	0.274909	0.682202	-33.2193	Sensitive	33.2193	aromatic amino acid family biosynthetic process, prephenate pathway	BP
GO:0009097	1	0	1	1	33.2193	Resistant	33.2193	isoleucine biosynthetic process	BP
GO:0009099	1	0	1	1	33.2193	Resistant	33.2193	L-valine biosynthetic process	BP
GO:0009103	0	1	0.274909	0.682202	-33.2193	Sensitive	33.2193	lipopolysaccharide biosynthetic process	BP
GO:0009112	4	4	0.226644	0.682202	0	Equal	0	nucleobase metabolic process	BP
GO:0009113	0	1	0.274909	0.682202	-33.2193	Sensitive	33.2193	purine nucleobase biosynthetic process	BP
GO:0009116	3	6	0.0160703	0.313889	-1	Sensitive	1	nucleoside metabolic process	BP
GO:0009117	9	13	0.00254204	0.0873573	-0.530515	Sensitive	0.530515	nucleotide metabolic process	BP
GO:0009119	3	5	0.0402655	0.502696	-0.736966	Sensitive	0.736966	ribonucleoside metabolic process	BP
GO:0009120	0	1	0.274909	0.682202	-33.2193	Sensitive	33.2193	deoxyribonucleoside metabolic process	BP
GO:0009123	4	6	0.030964	0.421319	-0.584963	Sensitive	0.584963	nucleoside monophosphate metabolic process	BP
GO:0009124	3	5	0.0402655	0.502696	-0.736966	Sensitive	0.736966	nucleoside monophosphate biosynthetic process	BP
GO:0009126	4	3	0.401596	0.870004	0.415037	Resistant	0.415037	purine nucleoside monophosphate metabolic process	BP
GO:0009127	3	3	0.355329	0.78666	0	Equal	0	purine nucleoside monophosphate biosynthetic process	BP
GO:0009129	0	1	0.274909	0.682202	-33.2193	Sensitive	33.2193	pyrimidine nucleoside monophosphate metabolic process	BP
GO:0009130	0	1	0.274909	0.682202	-33.2193	Sensitive	33.2193	pyrimidine nucleoside monophosphate biosynthetic process	BP
GO:0009132	3	3	0.355329	0.78666	0	Equal	0	nucleoside diphosphate metabolic process	BP
GO:0009133	0	1	0.274909	0.682202	-33.2193	Sensitive	33.2193	nucleoside diphosphate biosynthetic process	BP
GO:0009135	3	2	0.619705	1	0.584963	Resistant	0.584963	purine nucleoside diphosphate metabolic process	BP
GO:0009138	0	1	0.274909	0.682202	-33.2193	Sensitive	33.2193	pyrimidine nucleoside diphosphate metabolic process	BP
GO:0009139	0	1	0.274909	0.682202	-33.2193	Sensitive	33.2193	pyrimidine nucleoside diphosphate biosynthetic process	BP
GO:0009141	4	4	0.226644	0.682202	0	Equal	0	nucleoside triphosphate metabolic process	BP
GO:0009142	2	4	0.0520279	0.557287	-1	Sensitive	1	nucleoside triphosphate biosynthetic process	BP
GO:0009143	2	0	1	1	34.2193	Resistant	34.2193	nucleoside triphosphate catabolic process	BP
GO:0009144	3	3	0.355329	0.78666	0	Equal	0	purine nucleoside triphosphate metabolic process	BP
GO:0009145	2	3	0.131229	0.682202	-0.584963	Sensitive	0.584963	purine nucleoside triphosphate biosynthetic process	BP
GO:0009146	1	0	1	1	33.2193	Resistant	33.2193	purine nucleoside triphosphate catabolic process	BP
GO:0009147	0	1	0.274909	0.682202	-33.2193	Sensitive	33.2193	pyrimidine nucleoside triphosphate metabolic process	BP
GO:0009148	0	1	0.274909	0.682202	-33.2193	Sensitive	33.2193	pyrimidine nucleoside triphosphate biosynthetic process	BP
GO:0009150	5	7	0.0237722	0.394357	-0.485427	Sensitive	0.485427	purine ribonucleotide metabolic process	BP
GO:0009151	1	0	1	1	33.2193	Resistant	33.2193	purine deoxyribonucleotide metabolic process	BP
GO:0009152	4	6	0.030964	0.421319	-0.584963	Sensitive	0.584963	purine ribonucleotide biosynthetic process	BP
GO:0009155	1	0	1	1	33.2193	Resistant	33.2193	purine deoxyribonucleotide catabolic process	BP
GO:0009156	3	4	0.0954621	0.682202	-0.415037	Sensitive	0.415037	ribonucleoside monophosphate biosynthetic process	BP
GO:0009157	0	1	0.274909	0.682202	-33.2193	Sensitive	33.2193	deoxyribonucleoside monophosphate biosynthetic process	BP
GO:0009161	4	4	0.226644	0.682202	0	Equal	0	ribonucleoside monophosphate metabolic process	BP
GO:0009162	0	1	0.274909	0.682202	-33.2193	Sensitive	33.2193	deoxyribonucleoside monophosphate metabolic process	BP
GO:0009163	2	4	0.0520279	0.557287	-1	Sensitive	1	nucleoside biosynthetic process	BP
GO:0009165	7	12	0.0011616	0.0611605	-0.777608	Sensitive	0.777608	nucleotide biosynthetic process	BP
GO:0009166	4	2	0.669191	1	1	Resistant	1	nucleotide catabolic process	BP
GO:0009167	4	3	0.401596	0.870004	0.415037	Resistant	0.415037	purine ribonucleoside monophosphate metabolic process	BP
GO:0009168	3	3	0.355329	0.78666	0	Equal	0	purine ribonucleoside monophosphate biosynthetic process	BP
GO:0009173	0	1	0.274909	0.682202	-33.2193	Sensitive	33.2193	pyrimidine ribonucleoside monophosphate metabolic process	BP
GO:0009174	0	1	0.274909	0.682202	-33.2193	Sensitive	33.2193	pyrimidine ribonucleoside monophosphate biosynthetic process	BP
GO:0009179	3	2	0.619705	1	0.584963	Resistant	0.584963	purine ribonucleoside diphosphate metabolic process	BP
GO:0009185	3	2	0.619705	1	0.584963	Resistant	0.584963	ribonucleoside diphosphate metabolic process	BP
GO:0009186	0	1	0.274909	0.682202	-33.2193	Sensitive	33.2193	deoxyribonucleoside diphosphate metabolic process	BP
GO:0009189	0	1	0.274909	0.682202	-33.2193	Sensitive	33.2193	deoxyribonucleoside diphosphate biosynthetic process	BP
GO:0009196	0	1	0.274909	0.682202	-33.2193	Sensitive	33.2193	pyrimidine deoxyribonucleoside diphosphate metabolic process	BP
GO:0009197	0	1	0.274909	0.682202	-33.2193	Sensitive	33.2193	pyrimidine deoxyribonucleoside diphosphate biosynthetic process	BP
GO:0009199	2	3	0.131229	0.682202	-0.584963	Sensitive	0.584963	ribonucleoside triphosphate metabolic process	BP
GO:0009200	1	1	0.474347	0.89713	0	Equal	0	deoxyribonucleoside triphosphate metabolic process	BP
GO:0009201	2	3	0.131229	0.682202	-0.584963	Sensitive	0.584963	ribonucleoside triphosphate biosynthetic process	BP
GO:0009202	0	1	0.274909	0.682202	-33.2193	Sensitive	33.2193	deoxyribonucleoside triphosphate biosynthetic process	BP
GO:0009204	1	0	1	1	33.2193	Resistant	33.2193	deoxyribonucleoside triphosphate catabolic process	BP
GO:0009205	2	3	0.131229	0.682202	-0.584963	Sensitive	0.584963	purine ribonucleoside triphosphate metabolic process	BP
GO:0009206	2	3	0.131229	0.682202	-0.584963	Sensitive	0.584963	purine ribonucleoside triphosphate biosynthetic process	BP
GO:0009211	0	1	0.274909	0.682202	-33.2193	Sensitive	33.2193	pyrimidine deoxyribonucleoside triphosphate metabolic process	BP
GO:0009212	0	1	0.274909	0.682202	-33.2193	Sensitive	33.2193	pyrimidine deoxyribonucleoside triphosphate biosynthetic process	BP
GO:0009215	1	0	1	1	33.2193	Resistant	33.2193	purine deoxyribonucleoside triphosphate metabolic process	BP
GO:0009217	1	0	1	1	33.2193	Resistant	33.2193	purine deoxyribonucleoside triphosphate catabolic process	BP
GO:0009218	2	3	0.131229	0.682202	-0.584963	Sensitive	0.584963	pyrimidine ribonucleotide metabolic process	BP
GO:0009219	0	1	0.274909	0.682202	-33.2193	Sensitive	33.2193	pyrimidine deoxyribonucleotide metabolic process	BP
GO:0009220	2	3	0.131229	0.682202	-0.584963	Sensitive	0.584963	pyrimidine ribonucleotide biosynthetic process	BP
GO:0009221	0	1	0.274909	0.682202	-33.2193	Sensitive	33.2193	pyrimidine deoxyribonucleotide biosynthetic process	BP
GO:0009250	1	2	0.185031	0.682202	-1	Sensitive	1	glucan biosynthetic process	BP
GO:0009251	0	1	0.274909	0.682202	-33.2193	Sensitive	33.2193	glucan catabolic process	BP
GO:0009252	2	2	0.304295	0.703246	0	Equal	0	peptidoglycan biosynthetic process	BP
GO:0009259	7	10	0.0104413	0.225794	-0.514573	Sensitive	0.514573	ribonucleotide metabolic process	BP
GO:0009260	6	9	0.00806798	0.191575	-0.584963	Sensitive	0.584963	ribonucleotide biosynthetic process	BP
GO:0009262	2	1	1	1	1	Resistant	1	deoxyribonucleotide metabolic process	BP
GO:0009263	0	1	0.274909	0.682202	-33.2193	Sensitive	33.2193	deoxyribonucleotide biosynthetic process	BP
GO:0009264	2	0	1	1	34.2193	Resistant	34.2193	deoxyribonucleotide catabolic process	BP
GO:0009265	0	1	0.274909	0.682202	-33.2193	Sensitive	33.2193	2'-deoxyribonucleotide biosynthetic process	BP
GO:0009266	1	1	0.474347	0.89713	0	Equal	0	response to temperature stimulus	BP
GO:0009273	4	2	0.669191	1	1	Resistant	1	peptidoglycan-based cell wall biogenesis	BP
GO:0009274	1	0	1	1	33.2193	Resistant	33.2193	peptidoglycan-based cell wall	CC
GO:0009275	1	0	1	1	33.2193	Resistant	33.2193	Gram-positive-bacterium-type cell wall	CC
GO:0009291	1	0	1	1	33.2193	Resistant	33.2193	unidirectional conjugation	BP
GO:0009292	1	0	1	1	33.2193	Resistant	33.2193	horizontal gene transfer	BP
GO:0009295	3	3	0.355329	0.78666	0	Equal	0	nucleoid	CC
GO:0009308	1	0	1	1	33.2193	Resistant	33.2193	amine metabolic process	BP
GO:0009309	1	0	1	1	33.2193	Resistant	33.2193	amine biosynthetic process	BP
GO:0009394	1	1	0.474347	0.89713	0	Equal	0	2'-deoxyribonucleotide metabolic process	BP
GO:0009396	1	1	0.474347	0.89713	0	Equal	0	folic acid-containing compound biosynthetic process	BP
GO:0009401	1	0	1	1	33.2193	Resistant	33.2193	phosphoenolpyruvate-dependent sugar phosphotransferase system	BP
GO:0009409	1	1	0.474347	0.89713	0	Equal	0	response to cold	BP
GO:0009423	1	1	0.474347	0.89713	0	Equal	0	chorismate biosynthetic process	BP
GO:0009451	7	9	0.0197231	0.361888	-0.36257	Sensitive	0.36257	RNA modification	BP
GO:0009605	1	1	0.474347	0.89713	0	Equal	0	response to external stimulus	BP
GO:0009607	1	0	1	1	33.2193	Resistant	33.2193	response to biotic stimulus	BP
GO:0009628	1	1	0.474347	0.89713	0	Equal	0	response to abiotic stimulus	BP
GO:0009636	1	0	1	1	33.2193	Resistant	33.2193	response to toxic substance	BP
GO:0009653	0	1	0.274909	0.682202	-33.2193	Sensitive	33.2193	anatomical structure morphogenesis	BP
GO:0009820	0	1	0.274909	0.682202	-33.2193	Sensitive	33.2193	alkaloid metabolic process	BP
GO:0009889	8	3	1	1	1.41504	Resistant	1.41504	regulation of biosynthetic process	BP
GO:0009890	4	3	0.401596	0.870004	0.415037	Resistant	0.415037	negative regulation of biosynthetic process	BP
GO:0009891	3	1	1	1	1.58496	Resistant	1.58496	positive regulation of biosynthetic process	BP
GO:0009892	5	3	0.691876	1	0.736966	Resistant	0.736966	negative regulation of metabolic process	BP
GO:0009893	4	1	1	1	2	Resistant	2	positive regulation of metabolic process	BP
GO:0009894	1	0	1	1	33.2193	Resistant	33.2193	regulation of catabolic process	BP
GO:0009898	1	0	1	1	33.2193	Resistant	33.2193	cytoplasmic side of plasma membrane	CC
GO:0009975	1	0	1	1	33.2193	Resistant	33.2193	cyclase activity	MF
GO:0009982	1	2	0.185031	0.682202	-1	Sensitive	1	pseudouridine synthase activity	MF
GO:0009986	5	3	0.691876	1	0.736966	Resistant	0.736966	cell surface	CC
GO:0009987	76	58	5.03921e-05	0.00678054	0.389947	Resistant	0.389947	cellular process	BP
GO:0010038	0	1	0.274909	0.682202	-33.2193	Sensitive	33.2193	response to metal ion	BP
GO:0010043	0	1	0.274909	0.682202	-33.2193	Sensitive	33.2193	response to zinc ion	BP
GO:0010181	0	1	0.274909	0.682202	-33.2193	Sensitive	33.2193	FMN binding	MF
GO:0010339	1	0	1	1	33.2193	Resistant	33.2193	external side of cell wall	CC
GO:0010467	16	19	0.000828614	0.0501726	-0.247928	Sensitive	0.247928	gene expression	BP
GO:0010468	10	2	0.529392	0.992406	2.32193	Resistant	2.32193	regulation of gene expression	BP
GO:0010501	1	0	1	1	33.2193	Resistant	33.2193	RNA secondary structure unwinding	BP
GO:0010556	8	3	1	1	1.41504	Resistant	1.41504	regulation of macromolecule biosynthetic process	BP
GO:0010557	3	1	1	1	1.58496	Resistant	1.58496	positive regulation of macromolecule biosynthetic process	BP
GO:0010558	4	3	0.401596	0.870004	0.415037	Resistant	0.415037	negative regulation of macromolecule biosynthetic process	BP
GO:0010604	4	1	1	1	2	Resistant	2	positive regulation of macromolecule metabolic process	BP
GO:0010605	5	3	0.691876	1	0.736966	Resistant	0.736966	negative regulation of macromolecule metabolic process	BP
GO:0010608	2	0	1	1	34.2193	Resistant	34.2193	post-transcriptional regulation of gene expression	BP
GO:0010628	4	1	1	1	2	Resistant	2	positive regulation of gene expression	BP
GO:0010629	5	2	1	1	1.32193	Resistant	1.32193	negative regulation of gene expression	BP
GO:0010755	1	0	1	1	33.2193	Resistant	33.2193	regulation of plasminogen activation	BP
GO:0010756	1	0	1	1	33.2193	Resistant	33.2193	positive regulation of plasminogen activation	BP
GO:0010954	1	0	1	1	33.2193	Resistant	33.2193	positive regulation of protein processing	BP
GO:0015075	1	3	0.0657683	0.557287	-1.58496	Sensitive	1.58496	monoatomic ion transmembrane transporter activity	MF
GO:0015101	0	1	0.274909	0.682202	-33.2193	Sensitive	33.2193	organic cation transmembrane transporter activity	MF
GO:0015103	0	1	0.274909	0.682202	-33.2193	Sensitive	33.2193	inorganic anion transmembrane transporter activity	MF
GO:0015144	2	0	1	1	34.2193	Resistant	34.2193	carbohydrate transmembrane transporter activity	MF
GO:0015154	1	0	1	1	33.2193	Resistant	33.2193	disaccharide transmembrane transporter activity	MF
GO:0015157	1	0	1	1	33.2193	Resistant	33.2193	oligosaccharide transmembrane transporter activity	MF
GO:0015199	0	1	0.274909	0.682202	-33.2193	Sensitive	33.2193	amino-acid betaine transmembrane transporter activity	MF
GO:0015205	1	0	1	1	33.2193	Resistant	33.2193	nucleobase transmembrane transporter activity	MF
GO:0015318	0	1	0.274909	0.682202	-33.2193	Sensitive	33.2193	inorganic molecular entity transmembrane transporter activity	MF
GO:0015399	1	1	0.474347	0.89713	0	Equal	0	primary active transmembrane transporter activity	MF
GO:0015422	1	0	1	1	33.2193	Resistant	33.2193	ABC-type oligosaccharide transporter activity	MF
GO:0015423	1	0	1	1	33.2193	Resistant	33.2193	ABC-type maltose transporter activity	MF
GO:0015651	0	1	0.274909	0.682202	-33.2193	Sensitive	33.2193	quaternary ammonium group transmembrane transporter activity	MF
GO:0015695	0	1	0.274909	0.682202	-33.2193	Sensitive	33.2193	organic cation transport	BP
GO:0015697	0	1	0.274909	0.682202	-33.2193	Sensitive	33.2193	quaternary ammonium group transport	BP
GO:0015698	0	1	0.274909	0.682202	-33.2193	Sensitive	33.2193	inorganic anion transport	BP
GO:0015711	1	1	0.474347	0.89713	0	Equal	0	organic anion transport	BP
GO:0015766	1	0	1	1	33.2193	Resistant	33.2193	disaccharide transport	BP
GO:0015768	1	0	1	1	33.2193	Resistant	33.2193	maltose transport	BP
GO:0015772	1	0	1	1	33.2193	Resistant	33.2193	oligosaccharide transport	BP
GO:0015774	1	0	1	1	33.2193	Resistant	33.2193	polysaccharide transport	BP
GO:0015838	0	1	0.274909	0.682202	-33.2193	Sensitive	33.2193	amino-acid betaine transport	BP
GO:0015851	1	0	1	1	33.2193	Resistant	33.2193	nucleobase transport	BP
GO:0015934	3	5	0.0402655	0.502696	-0.736966	Sensitive	0.736966	large ribosomal subunit	CC
GO:0015935	7	1	0.458281	0.89713	2.80735	Resistant	2.80735	small ribosomal subunit	CC
GO:0015936	1	2	0.185031	0.682202	-1	Sensitive	1	coenzyme A metabolic process	BP
GO:0015937	1	2	0.185031	0.682202	-1	Sensitive	1	coenzyme A biosynthetic process	BP
GO:0015969	0	1	0.274909	0.682202	-33.2193	Sensitive	33.2193	guanosine tetraphosphate metabolic process	BP
GO:0015980	1	3	0.0657683	0.557287	-1.58496	Sensitive	1.58496	energy derivation by oxidation of organic compounds	BP
GO:0016020	18	13	0.101856	0.682202	0.469485	Resistant	0.469485	membrane	CC
GO:0016043	6	3	0.71279	1	1	Resistant	1	cellular component organization	BP
GO:0016051	2	3	0.131229	0.682202	-0.584963	Sensitive	0.584963	carbohydrate biosynthetic process	BP
GO:0016052	3	3	0.355329	0.78666	0	Equal	0	carbohydrate catabolic process	BP
GO:0016053	19	5	0.645726	1	1.926	Resistant	1.926	organic acid biosynthetic process	BP
GO:0016054	1	0	1	1	33.2193	Resistant	33.2193	organic acid catabolic process	BP
GO:0016070	13	18	0.000344753	0.0219735	-0.469485	Sensitive	0.469485	RNA metabolic process	BP
GO:0016071	1	1	0.474347	0.89713	0	Equal	0	mRNA metabolic process	BP
GO:0016072	7	5	0.328985	0.752643	0.485427	Resistant	0.485427	rRNA metabolic process	BP
GO:0016208	1	0	1	1	33.2193	Resistant	33.2193	AMP binding	MF
GO:0016301	8	9	0.0268069	0.421319	-0.169925	Sensitive	0.169925	kinase activity	MF
GO:0016310	9	10	0.0194281	0.361888	-0.152003	Sensitive	0.152003	phosphorylation	BP
GO:0016311	2	0	1	1	34.2193	Resistant	34.2193	dephosphorylation	BP
GO:0016411	1	0	1	1	33.2193	Resistant	33.2193	acylglycerol O-acyltransferase activity	MF
GO:0016423	0	1	0.274909	0.682202	-33.2193	Sensitive	33.2193	tRNA (guanine) methyltransferase activity	MF
GO:0016434	1	1	0.474347	0.89713	0	Equal	0	rRNA (cytosine) methyltransferase activity	MF
GO:0016435	3	0	0.566027	1	34.8042	Resistant	34.8042	rRNA (guanine) methyltransferase activity	MF
GO:0016436	0	1	0.274909	0.682202	-33.2193	Sensitive	33.2193	rRNA (uridine) methyltransferase activity	MF
GO:0016462	9	6	0.260855	0.682202	0.584963	Resistant	0.584963	pyrophosphatase activity	MF
GO:0016485	1	0	1	1	33.2193	Resistant	33.2193	protein processing	BP
GO:0016491	10	3	1	1	1.73697	Resistant	1.73697	oxidoreductase activity	MF
GO:0016556	0	1	0.274909	0.682202	-33.2193	Sensitive	33.2193	mRNA modification	BP
GO:0016614	2	1	1	1	1	Resistant	1	oxidoreductase activity, acting on CH-OH group of donors	MF
GO:0016616	2	1	1	1	1	Resistant	1	oxidoreductase activity, acting on the CH-OH group of donors, NAD or NADP as acceptor	MF
GO:0016620	3	0	0.566027	1	34.8042	Resistant	34.8042	oxidoreductase activity, acting on the aldehyde or oxo group of donors, NAD or NADP as acceptor	MF
GO:0016627	3	2	0.619705	1	0.584963	Resistant	0.584963	oxidoreductase activity, acting on the CH-CH group of donors	MF
GO:0016628	0	1	0.274909	0.682202	-33.2193	Sensitive	33.2193	oxidoreductase activity, acting on the CH-CH group of donors, NAD or NADP as acceptor	MF
GO:0016635	3	1	1	1	1.58496	Resistant	1.58496	oxidoreductase activity, acting on the CH-CH group of donors, quinone or related compound as acceptor	MF
GO:0016645	2	0	1	1	34.2193	Resistant	34.2193	oxidoreductase activity, acting on the CH-NH group of donors	MF
GO:0016646	2	0	1	1	34.2193	Resistant	34.2193	oxidoreductase activity, acting on the CH-NH group of donors, NAD or NADP as acceptor	MF
GO:0016740	28	24	0.00405017	0.117438	0.222392	Resistant	0.222392	transferase activity	MF
GO:0016741	8	5	0.362069	0.797211	0.678072	Resistant	0.678072	transferase activity, transferring one-carbon groups	MF
GO:0016743	2	1	1	1	1	Resistant	1	carboxyl- or carbamoyltransferase activity	MF
GO:0016744	1	0	1	1	33.2193	Resistant	33.2193	transketolase or transaldolase activity	MF
GO:0016746	1	1	0.474347	0.89713	0	Equal	0	acyltransferase activity	MF
GO:0016747	1	1	0.474347	0.89713	0	Equal	0	acyltransferase activity, transferring groups other than amino-acyl groups	MF
GO:0016748	0	1	0.274909	0.682202	-33.2193	Sensitive	33.2193	succinyltransferase activity	MF
GO:0016750	0	1	0.274909	0.682202	-33.2193	Sensitive	33.2193	O-succinyltransferase activity	MF
GO:0016757	4	4	0.226644	0.682202	0	Equal	0	glycosyltransferase activity	MF
GO:0016758	1	3	0.0657683	0.557287	-1.58496	Sensitive	1.58496	hexosyltransferase activity	MF
GO:0016763	2	1	1	1	1	Resistant	1	pentosyltransferase activity	MF
GO:0016765	1	1	0.474347	0.89713	0	Equal	0	transferase activity, transferring alkyl or aryl (other than methyl) groups	MF
GO:0016772	13	14	0.00775525	0.191575	-0.106915	Sensitive	0.106915	transferase activity, transferring phosphorus-containing groups	MF
GO:0016773	6	6	0.1023	0.682202	0	Equal	0	phosphotransferase activity, alcohol group as acceptor	MF
GO:0016774	2	0	1	1	34.2193	Resistant	34.2193	phosphotransferase activity, carboxyl group as acceptor	MF
GO:0016776	1	2	0.185031	0.682202	-1	Sensitive	1	phosphotransferase activity, phosphate group as acceptor	MF
GO:0016778	0	1	0.274909	0.682202	-33.2193	Sensitive	33.2193	diphosphotransferase activity	MF
GO:0016779	2	2	0.304295	0.703246	0	Equal	0	nucleotidyltransferase activity	MF
GO:0016780	2	1	1	1	1	Resistant	1	phosphotransferase activity, for other substituted phosphate groups	MF
GO:0016787	26	13	0.468164	0.89713	1	Resistant	1	hydrolase activity	MF
GO:0016788	9	6	0.260855	0.682202	0.584963	Resistant	0.584963	hydrolase activity, acting on ester bonds	MF
GO:0016791	2	0	1	1	34.2193	Resistant	34.2193	phosphatase activity	MF
GO:0016793	1	0	1	1	33.2193	Resistant	33.2193	triphosphoric monoester hydrolase activity	MF
GO:0016794	0	1	0.274909	0.682202	-33.2193	Sensitive	33.2193	diphosphoric monoester hydrolase activity	MF
GO:0016798	1	0	1	1	33.2193	Resistant	33.2193	hydrolase activity, acting on glycosyl bonds	MF
GO:0016799	1	0	1	1	33.2193	Resistant	33.2193	hydrolase activity, hydrolyzing N-glycosyl compounds	MF
GO:0016810	4	1	1	1	2	Resistant	2	hydrolase activity, acting on carbon-nitrogen (but not peptide) bonds	MF
GO:0016811	1	1	0.474347	0.89713	0	Equal	0	hydrolase activity, acting on carbon-nitrogen (but not peptide) bonds, in linear amides	MF
GO:0016812	2	0	1	1	34.2193	Resistant	34.2193	hydrolase activity, acting on carbon-nitrogen (but not peptide) bonds, in cyclic amides	MF
GO:0016814	1	0	1	1	33.2193	Resistant	33.2193	hydrolase activity, acting on carbon-nitrogen (but not peptide) bonds, in cyclic amidines	MF
GO:0016817	9	6	0.260855	0.682202	0.584963	Resistant	0.584963	hydrolase activity, acting on acid anhydrides	MF
GO:0016818	9	6	0.260855	0.682202	0.584963	Resistant	0.584963	hydrolase activity, acting on acid anhydrides, in phosphorus-containing anhydrides	MF
GO:0016829	6	2	1	1	1.58496	Resistant	1.58496	lyase activity	MF
GO:0016830	4	1	1	1	2	Resistant	2	carbon-carbon lyase activity	MF
GO:0016831	3	1	1	1	1.58496	Resistant	1.58496	carboxy-lyase activity	MF
GO:0016832	1	0	1	1	33.2193	Resistant	33.2193	aldehyde-lyase activity	MF
GO:0016835	1	1	0.474347	0.89713	0	Equal	0	carbon-oxygen lyase activity	MF
GO:0016836	1	0	1	1	33.2193	Resistant	33.2193	hydro-lyase activity	MF
GO:0016838	0	1	0.274909	0.682202	-33.2193	Sensitive	33.2193	carbon-oxygen lyase activity, acting on phosphates	MF
GO:0016849	1	0	1	1	33.2193	Resistant	33.2193	phosphorus-oxygen lyase activity	MF
GO:0016853	4	4	0.226644	0.682202	0	Equal	0	isomerase activity	MF
GO:0016854	0	1	0.274909	0.682202	-33.2193	Sensitive	33.2193	racemase and epimerase activity	MF
GO:0016855	0	1	0.274909	0.682202	-33.2193	Sensitive	33.2193	racemase and epimerase activity, acting on amino acids and derivatives	MF
GO:0016859	1	0	1	1	33.2193	Resistant	33.2193	cis-trans isomerase activity	MF
GO:0016866	2	2	0.304295	0.703246	0	Equal	0	intramolecular transferase activity	MF
GO:0016868	1	0	1	1	33.2193	Resistant	33.2193	intramolecular phosphotransferase activity	MF
GO:0016874	7	5	0.328985	0.752643	0.485427	Resistant	0.485427	ligase activity	MF
GO:0016875	1	3	0.0657683	0.557287	-1.58496	Sensitive	1.58496	ligase activity, forming carbon-oxygen bonds	MF
GO:0016879	6	2	1	1	1.58496	Resistant	1.58496	ligase activity, forming carbon-nitrogen bonds	MF
GO:0016881	1	0	1	1	33.2193	Resistant	33.2193	acid-amino acid ligase activity	MF
GO:0016882	1	1	0.474347	0.89713	0	Equal	0	cyclo-ligase activity	MF
GO:0016884	3	1	1	1	1.58496	Resistant	1.58496	carbon-nitrogen ligase activity, with glutamine as amido-N-donor	MF
GO:0016887	6	3	0.71279	1	1	Resistant	1	ATP hydrolysis activity	MF
GO:0016891	1	3	0.0657683	0.557287	-1.58496	Sensitive	1.58496	RNA endonuclease activity, producing 5'-phosphomonoesters	MF
GO:0016893	1	3	0.0657683	0.557287	-1.58496	Sensitive	1.58496	endonuclease activity, active with either ribo- or deoxyribonucleic acids and producing 5'-phosphomonoesters	MF
GO:0016903	3	0	0.566027	1	34.8042	Resistant	34.8042	oxidoreductase activity, acting on the aldehyde or oxo group of donors	MF
GO:0017057	1	1	0.474347	0.89713	0	Equal	0	6-phosphogluconolactonase activity	MF
GO:0017076	3	3	0.355329	0.78666	0	Equal	0	purine nucleotide binding	MF
GO:0017111	6	5	0.186735	0.682202	0.263034	Resistant	0.263034	ribonucleoside triphosphate phosphatase activity	MF
GO:0017148	1	0	1	1	33.2193	Resistant	33.2193	negative regulation of translation	BP
GO:0017171	1	0	1	1	33.2193	Resistant	33.2193	serine hydrolase activity	MF
GO:0018193	1	1	0.474347	0.89713	0	Equal	0	peptidyl-amino acid modification	BP
GO:0018206	0	1	0.274909	0.682202	-33.2193	Sensitive	33.2193	peptidyl-methionine modification	BP
GO:0018208	1	0	1	1	33.2193	Resistant	33.2193	peptidyl-proline modification	BP
GO:0019001	0	1	0.274909	0.682202	-33.2193	Sensitive	33.2193	guanyl nucleotide binding	MF
GO:0019003	0	1	0.274909	0.682202	-33.2193	Sensitive	33.2193	GDP binding	MF
GO:0019104	1	0	1	1	33.2193	Resistant	33.2193	DNA N-glycosylase activity	MF
GO:0019136	0	1	0.274909	0.682202	-33.2193	Sensitive	33.2193	deoxynucleoside kinase activity	MF
GO:0019200	2	3	0.131229	0.682202	-0.584963	Sensitive	0.584963	carbohydrate kinase activity	MF
GO:0019202	2	0	1	1	34.2193	Resistant	34.2193	amino acid kinase activity	MF
GO:0019205	1	3	0.0657683	0.557287	-1.58496	Sensitive	1.58496	nucleobase-containing compound kinase activity	MF
GO:0019206	0	2	0.0754708	0.557287	-34.2193	Sensitive	34.2193	nucleoside kinase activity	MF
GO:0019219	7	3	1	1	1.22239	Resistant	1.22239	regulation of nucleobase-containing compound metabolic process	BP
GO:0019220	1	0	1	1	33.2193	Resistant	33.2193	regulation of phosphate metabolic process	BP
GO:0019222	11	3	0.769468	1	1.87447	Resistant	1.87447	regulation of metabolic process	BP
GO:0019238	1	0	1	1	33.2193	Resistant	33.2193	cyclohydrolase activity	MF
GO:0019318	2	0	1	1	34.2193	Resistant	34.2193	hexose metabolic process	BP
GO:0019319	1	0	1	1	33.2193	Resistant	33.2193	hexose biosynthetic process	BP
GO:0019359	2	3	0.131229	0.682202	-0.584963	Sensitive	0.584963	nicotinamide nucleotide biosynthetic process	BP
GO:0019362	2	3	0.131229	0.682202	-0.584963	Sensitive	0.584963	pyridine nucleotide metabolic process	BP
GO:0019363	2	3	0.131229	0.682202	-0.584963	Sensitive	0.584963	pyridine nucleotide biosynthetic process	BP
GO:0019538	13	11	0.0623414	0.557287	0.241008	Resistant	0.241008	protein metabolic process	BP
GO:0019627	5	0	0.331263	0.752643	35.5412	Resistant	35.5412	urea metabolic process	BP
GO:0019632	2	0	1	1	34.2193	Resistant	34.2193	shikimate metabolic process	BP
GO:0019637	14	15	0.00557601	0.143671	-0.0995357	Sensitive	0.0995357	organophosphate metabolic process	BP
GO:0019674	0	2	0.0754708	0.557287	-34.2193	Sensitive	34.2193	NAD metabolic process	BP
GO:0019692	1	1	0.474347	0.89713	0	Equal	0	deoxyribose phosphate metabolic process	BP
GO:0019693	7	10	0.0104413	0.225794	-0.514573	Sensitive	0.514573	ribose phosphate metabolic process	BP
GO:0019751	1	0	1	1	33.2193	Resistant	33.2193	polyol metabolic process	BP
GO:0019752	23	8	1	1	1.52356	Resistant	1.52356	carboxylic acid metabolic process	BP
GO:0019842	0	1	0.274909	0.682202	-33.2193	Sensitive	33.2193	vitamin binding	MF
GO:0019843	4	1	1	1	2	Resistant	2	rRNA binding	MF
GO:0019856	2	2	0.304295	0.703246	0	Equal	0	pyrimidine nucleobase biosynthetic process	BP
GO:0019899	1	0	1	1	33.2193	Resistant	33.2193	enzyme binding	MF
GO:0019954	1	0	1	1	33.2193	Resistant	33.2193	asexual reproduction	BP
GO:0022402	1	1	0.474347	0.89713	0	Equal	0	cell cycle process	BP
GO:0022414	1	0	1	1	33.2193	Resistant	33.2193	reproductive process	BP
GO:0022603	2	0	1	1	34.2193	Resistant	34.2193	regulation of anatomical structure morphogenesis	BP
GO:0022604	2	0	1	1	34.2193	Resistant	34.2193	regulation of cell morphogenesis	BP
GO:0022607	3	2	0.619705	1	0.584963	Resistant	0.584963	cellular component assembly	BP
GO:0022613	10	7	0.272054	0.682202	0.514573	Resistant	0.514573	ribonucleoprotein complex biogenesis	BP
GO:0022616	0	2	0.0754708	0.557287	-34.2193	Sensitive	34.2193	DNA strand elongation	BP
GO:0022618	3	1	1	1	1.58496	Resistant	1.58496	protein-RNA complex assembly	BP
GO:0022625	3	5	0.0402655	0.502696	-0.736966	Sensitive	0.736966	cytosolic large ribosomal subunit	CC
GO:0022626	8	5	0.362069	0.797211	0.678072	Resistant	0.678072	cytosolic ribosome	CC
GO:0022627	5	0	0.331263	0.752643	35.5412	Resistant	35.5412	cytosolic small ribosomal subunit	CC
GO:0022804	2	1	1	1	1	Resistant	1	active transmembrane transporter activity	MF
GO:0022857	6	5	0.186735	0.682202	0.263034	Resistant	0.263034	transmembrane transporter activity	MF
GO:0023052	1	0	1	1	33.2193	Resistant	33.2193	signaling	BP
GO:0030145	1	0	1	1	33.2193	Resistant	33.2193	manganese ion binding	MF
GO:0030154	0	1	0.274909	0.682202	-33.2193	Sensitive	33.2193	cell differentiation	BP
GO:0030162	1	0	1	1	33.2193	Resistant	33.2193	regulation of proteolysis	BP
GO:0030170	0	1	0.274909	0.682202	-33.2193	Sensitive	33.2193	pyridoxal phosphate binding	MF
GO:0030174	0	1	0.274909	0.682202	-33.2193	Sensitive	33.2193	regulation of DNA-templated DNA replication initiation	BP
GO:0030193	1	0	1	1	33.2193	Resistant	33.2193	regulation of blood coagulation	BP
GO:0030195	1	0	1	1	33.2193	Resistant	33.2193	negative regulation of blood coagulation	BP
GO:0030203	2	2	0.304295	0.703246	0	Equal	0	glycosaminoglycan metabolic process	BP
GO:0030234	0	2	0.0754708	0.557287	-34.2193	Sensitive	34.2193	enzyme regulator activity	MF
GO:0030246	2	3	0.131229	0.682202	-0.584963	Sensitive	0.584963	carbohydrate binding	MF
GO:0030247	2	3	0.131229	0.682202	-0.584963	Sensitive	0.584963	polysaccharide binding	MF
GO:0030272	1	1	0.474347	0.89713	0	Equal	0	5-formyltetrahydrofolate cyclo-ligase activity	MF
GO:0030288	2	0	1	1	34.2193	Resistant	34.2193	outer membrane-bounded periplasmic space	CC
GO:0030312	4	1	1	1	2	Resistant	2	external encapsulating structure	CC
GO:0030313	2	0	1	1	34.2193	Resistant	34.2193	cell envelope	CC
GO:0030428	2	0	1	1	34.2193	Resistant	34.2193	cell septum	CC
GO:0030435	0	1	0.274909	0.682202	-33.2193	Sensitive	33.2193	sporulation resulting in formation of a cellular spore	BP
GO:0030488	1	1	0.474347	0.89713	0	Equal	0	tRNA methylation	BP
GO:0030554	3	2	0.619705	1	0.584963	Resistant	0.584963	adenyl nucleotide binding	MF
GO:0030572	1	1	0.474347	0.89713	0	Equal	0	phosphatidyltransferase activity	MF
GO:0030695	0	1	0.274909	0.682202	-33.2193	Sensitive	33.2193	GTPase regulator activity	MF
GO:0030983	0	1	0.274909	0.682202	-33.2193	Sensitive	33.2193	mismatched DNA binding	MF
GO:0031106	0	1	0.274909	0.682202	-33.2193	Sensitive	33.2193	septin ring organization	BP
GO:0031118	1	0	1	1	33.2193	Resistant	33.2193	rRNA pseudouridine synthesis	BP
GO:0031119	0	1	0.274909	0.682202	-33.2193	Sensitive	33.2193	tRNA pseudouridine synthesis	BP
GO:0031123	0	1	0.274909	0.682202	-33.2193	Sensitive	33.2193	RNA 3'-end processing	BP
GO:0031167	5	3	0.691876	1	0.736966	Resistant	0.736966	rRNA methylation	BP
GO:0031279	1	0	1	1	33.2193	Resistant	33.2193	regulation of cyclase activity	BP
GO:0031281	1	0	1	1	33.2193	Resistant	33.2193	positive regulation of cyclase activity	BP
GO:0031323	10	3	1	1	1.73697	Resistant	1.73697	regulation of cellular metabolic process	BP
GO:0031324	4	3	0.401596	0.870004	0.415037	Resistant	0.415037	negative regulation of cellular metabolic process	BP
GO:0031325	4	1	1	1	2	Resistant	2	positive regulation of cellular metabolic process	BP
GO:0031326	8	3	1	1	1.41504	Resistant	1.41504	regulation of cellular biosynthetic process	BP
GO:0031327	4	3	0.401596	0.870004	0.415037	Resistant	0.415037	negative regulation of cellular biosynthetic process	BP
GO:0031328	3	1	1	1	1.58496	Resistant	1.58496	positive regulation of cellular biosynthetic process	BP
GO:0031329	1	0	1	1	33.2193	Resistant	33.2193	regulation of cellular catabolic process	BP
GO:0031365	0	1	0.274909	0.682202	-33.2193	Sensitive	33.2193	N-terminal protein amino acid modification	BP
GO:0031460	0	1	0.274909	0.682202	-33.2193	Sensitive	33.2193	glycine betaine transport	BP
GO:0031667	0	1	0.274909	0.682202	-33.2193	Sensitive	33.2193	response to nutrient levels	BP
GO:0032101	1	0	1	1	33.2193	Resistant	33.2193	regulation of response to external stimulus	BP
GO:0032102	1	0	1	1	33.2193	Resistant	33.2193	negative regulation of response to external stimulus	BP
GO:0032153	1	0	1	1	33.2193	Resistant	33.2193	cell division site	CC
GO:0032185	0	1	0.274909	0.682202	-33.2193	Sensitive	33.2193	septin cytoskeleton organization	BP
GO:0032217	1	1	0.474347	0.89713	0	Equal	0	riboflavin transmembrane transporter activity	MF
GO:0032218	1	1	0.474347	0.89713	0	Equal	0	riboflavin transport	BP
GO:0032259	6	5	0.186735	0.682202	0.263034	Resistant	0.263034	methylation	BP
GO:0032296	1	0	1	1	33.2193	Resistant	33.2193	double-stranded RNA-specific ribonuclease activity	MF
GO:0032297	0	1	0.274909	0.682202	-33.2193	Sensitive	33.2193	negative regulation of DNA-templated DNA replication initiation	BP
GO:0032299	0	2	0.0754708	0.557287	-34.2193	Sensitive	34.2193	ribonuclease H2 complex	CC
GO:0032300	0	1	0.274909	0.682202	-33.2193	Sensitive	33.2193	mismatch repair complex	CC
GO:0032392	2	0	1	1	34.2193	Resistant	34.2193	DNA geometric change	BP
GO:0032502	0	1	0.274909	0.682202	-33.2193	Sensitive	33.2193	developmental process	BP
GO:0032506	0	1	0.274909	0.682202	-33.2193	Sensitive	33.2193	cytokinetic process	BP
GO:0032508	2	0	1	1	34.2193	Resistant	34.2193	DNA duplex unwinding	BP
GO:0032549	0	1	0.274909	0.682202	-33.2193	Sensitive	33.2193	ribonucleoside binding	MF
GO:0032550	0	1	0.274909	0.682202	-33.2193	Sensitive	33.2193	purine ribonucleoside binding	MF
GO:0032553	3	3	0.355329	0.78666	0	Equal	0	ribonucleotide binding	MF
GO:0032555	3	2	0.619705	1	0.584963	Resistant	0.584963	purine ribonucleotide binding	MF
GO:0032559	3	1	1	1	1.58496	Resistant	1.58496	adenyl ribonucleotide binding	MF
GO:0032561	0	1	0.274909	0.682202	-33.2193	Sensitive	33.2193	guanyl ribonucleotide binding	MF
GO:0032677	1	0	1	1	33.2193	Resistant	33.2193	regulation of interleukin-8 production	BP
GO:0032757	1	0	1	1	33.2193	Resistant	33.2193	positive regulation of interleukin-8 production	BP
GO:0032787	4	2	0.669191	1	1	Resistant	1	monocarboxylic acid metabolic process	BP
GO:0032879	1	0	1	1	33.2193	Resistant	33.2193	regulation of localization	BP
GO:0032880	1	0	1	1	33.2193	Resistant	33.2193	regulation of protein localization	BP
GO:0032991	16	10	0.266767	0.682202	0.678072	Resistant	0.678072	protein-containing complex	CC
GO:0032993	2	1	1	1	1	Resistant	1	protein-DNA complex	CC
GO:0033036	1	0	1	1	33.2193	Resistant	33.2193	macromolecule localization	BP
GO:0033037	1	0	1	1	33.2193	Resistant	33.2193	polysaccharide localization	BP
GO:0033554	5	5	0.14987	0.682202	0	Equal	0	cellular response to stress	BP
GO:0033567	0	2	0.0754708	0.557287	-34.2193	Sensitive	34.2193	DNA replication, Okazaki fragment processing	BP
GO:0033865	1	3	0.0657683	0.557287	-1.58496	Sensitive	1.58496	nucleoside bisphosphate metabolic process	BP
GO:0033866	1	2	0.185031	0.682202	-1	Sensitive	1	nucleoside bisphosphate biosynthetic process	BP
GO:0033875	1	3	0.0657683	0.557287	-1.58496	Sensitive	1.58496	ribonucleoside bisphosphate metabolic process	BP
GO:0034030	1	2	0.185031	0.682202	-1	Sensitive	1	ribonucleoside bisphosphate biosynthetic process	BP
GO:0034032	1	3	0.0657683	0.557287	-1.58496	Sensitive	1.58496	purine nucleoside bisphosphate metabolic process	BP
GO:0034033	1	2	0.185031	0.682202	-1	Sensitive	1	purine nucleoside bisphosphate biosynthetic process	BP
GO:0034035	0	1	0.274909	0.682202	-33.2193	Sensitive	33.2193	purine ribonucleoside bisphosphate metabolic process	BP
GO:0034061	1	0	1	1	33.2193	Resistant	33.2193	DNA polymerase activity	MF
GO:0034219	2	0	1	1	34.2193	Resistant	34.2193	carbohydrate transmembrane transport	BP
GO:0034220	1	3	0.0657683	0.557287	-1.58496	Sensitive	1.58496	monoatomic ion transmembrane transport	BP
GO:0034248	3	0	0.566027	1	34.8042	Resistant	34.8042	regulation of amide metabolic process	BP
GO:0034249	1	0	1	1	33.2193	Resistant	33.2193	negative regulation of amide metabolic process	BP
GO:0034250	1	0	1	1	33.2193	Resistant	33.2193	positive regulation of amide metabolic process	BP
GO:0034404	7	6	0.207422	0.682202	0.222392	Resistant	0.222392	nucleobase-containing small molecule biosynthetic process	BP
GO:0034654	13	15	0.00428674	0.120727	-0.206451	Sensitive	0.206451	nucleobase-containing compound biosynthetic process	BP
GO:0034655	6	4	0.476346	0.89713	0.584963	Resistant	0.584963	nucleobase-containing compound catabolic process	BP
GO:0035461	1	1	0.474347	0.89713	0	Equal	0	vitamin transmembrane transport	BP
GO:0035639	2	2	0.304295	0.703246	0	Equal	0	purine ribonucleoside triphosphate binding	MF
GO:0035821	1	0	1	1	33.2193	Resistant	33.2193	modulation of process of another organism	BP
GO:0035999	1	1	0.474347	0.89713	0	Equal	0	tetrahydrofolate interconversion	BP
GO:0036094	4	6	0.030964	0.421319	-0.584963	Sensitive	0.584963	small molecule binding	MF
GO:0036211	2	2	0.304295	0.703246	0	Equal	0	protein modification process	BP
GO:0036265	3	0	0.566027	1	34.8042	Resistant	34.8042	RNA (guanine-N7)-methylation	BP
GO:0036361	0	1	0.274909	0.682202	-33.2193	Sensitive	33.2193	racemase activity, acting on amino acids and derivatives	MF
GO:0040007	1	0	1	1	33.2193	Resistant	33.2193	growth	BP
GO:0042171	1	0	1	1	33.2193	Resistant	33.2193	lysophosphatidic acid acyltransferase activity	MF
GO:0042221	3	2	0.619705	1	0.584963	Resistant	0.584963	response to chemical	BP
GO:0042254	10	7	0.272054	0.682202	0.514573	Resistant	0.514573	ribosome biogenesis	BP
GO:0042255	3	1	1	1	1.58496	Resistant	1.58496	ribosome assembly	BP
GO:0042273	2	2	0.304295	0.703246	0	Equal	0	ribosomal large subunit biogenesis	BP
GO:0042274	1	0	1	1	33.2193	Resistant	33.2193	ribosomal small subunit biogenesis	BP
GO:0042278	2	3	0.131229	0.682202	-0.584963	Sensitive	0.584963	purine nucleoside metabolic process	BP
GO:0042398	1	1	0.474347	0.89713	0	Equal	0	cellular modified amino acid biosynthetic process	BP
GO:0042401	1	0	1	1	33.2193	Resistant	33.2193	biogenic amine biosynthetic process	BP
GO:0042430	1	0	1	1	33.2193	Resistant	33.2193	indole-containing compound metabolic process	BP
GO:0042435	1	0	1	1	33.2193	Resistant	33.2193	indole-containing compound biosynthetic process	BP
GO:0042440	0	1	0.274909	0.682202	-33.2193	Sensitive	33.2193	pigment metabolic process	BP
GO:0042450	1	0	1	1	33.2193	Resistant	33.2193	arginine biosynthetic process via ornithine	BP
GO:0042451	1	2	0.185031	0.682202	-1	Sensitive	1	purine nucleoside biosynthetic process	BP
GO:0042455	2	4	0.0520279	0.557287	-1	Sensitive	1	ribonucleoside biosynthetic process	BP
GO:0042546	4	2	0.669191	1	1	Resistant	1	cell wall biogenesis	BP
GO:0042558	1	1	0.474347	0.89713	0	Equal	0	pteridine-containing compound metabolic process	BP
GO:0042559	1	1	0.474347	0.89713	0	Equal	0	pteridine-containing compound biosynthetic process	BP
GO:0042578	3	1	1	1	1.58496	Resistant	1.58496	phosphoric ester hydrolase activity	MF
GO:0042586	0	1	0.274909	0.682202	-33.2193	Sensitive	33.2193	peptide deformylase activity	MF
GO:0042594	0	1	0.274909	0.682202	-33.2193	Sensitive	33.2193	response to starvation	BP
GO:0042597	2	0	1	1	34.2193	Resistant	34.2193	periplasmic space	CC
GO:0042602	1	0	1	1	33.2193	Resistant	33.2193	riboflavin reductase (NADPH) activity	MF
GO:0042626	1	1	0.474347	0.89713	0	Equal	0	ATPase-coupled transmembrane transporter activity	MF
GO:0042780	0	1	0.274909	0.682202	-33.2193	Sensitive	33.2193	tRNA 3'-end processing	BP
GO:0042781	0	1	0.274909	0.682202	-33.2193	Sensitive	33.2193	3'-tRNA processing endoribonuclease activity	MF
GO:0042802	4	6	0.030964	0.421319	-0.584963	Sensitive	0.584963	identical protein binding	MF
GO:0042866	2	2	0.304295	0.703246	0	Equal	0	pyruvate biosynthetic process	BP
GO:0042906	1	0	1	1	33.2193	Resistant	33.2193	xanthine transport	BP
GO:0042907	1	0	1	1	33.2193	Resistant	33.2193	xanthine transmembrane transporter activity	MF
GO:0042956	1	0	1	1	33.2193	Resistant	33.2193	maltodextrin transmembrane transport	BP
GO:0043021	2	0	1	1	34.2193	Resistant	34.2193	ribonucleoprotein complex binding	MF
GO:0043022	2	0	1	1	34.2193	Resistant	34.2193	ribosome binding	MF
GO:0043024	1	0	1	1	33.2193	Resistant	33.2193	ribosomal small subunit binding	MF
GO:0043038	1	3	0.0657683	0.557287	-1.58496	Sensitive	1.58496	amino acid activation	BP
GO:0043039	1	3	0.0657683	0.557287	-1.58496	Sensitive	1.58496	tRNA aminoacylation	BP
GO:0043043	6	8	0.0291569	0.421319	-0.415037	Sensitive	0.415037	peptide biosynthetic process	BP
GO:0043085	1	0	1	1	33.2193	Resistant	33.2193	positive regulation of catalytic activity	BP
GO:0043093	1	0	1	1	33.2193	Resistant	33.2193	FtsZ-dependent cytokinesis	BP
GO:0043094	0	2	0.0754708	0.557287	-34.2193	Sensitive	34.2193	cellular metabolic compound salvage	BP
GO:0043096	0	1	0.274909	0.682202	-33.2193	Sensitive	33.2193	purine nucleobase salvage	BP
GO:0043097	0	1	0.274909	0.682202	-33.2193	Sensitive	33.2193	pyrimidine nucleoside salvage	BP
GO:0043101	0	1	0.274909	0.682202	-33.2193	Sensitive	33.2193	purine-containing compound salvage	BP
GO:0043137	0	2	0.0754708	0.557287	-34.2193	Sensitive	34.2193	DNA replication, removal of RNA primer	BP
GO:0043138	1	0	1	1	33.2193	Resistant	33.2193	3'-5' DNA helicase activity	MF
GO:0043167	6	5	0.186735	0.682202	0.263034	Resistant	0.263034	ion binding	MF
GO:0043168	3	5	0.0402655	0.502696	-0.736966	Sensitive	0.736966	anion binding	MF
GO:0043169	4	0	0.580387	1	35.2193	Resistant	35.2193	cation binding	MF
GO:0043170	34	35	4.523e-05	0.00678054	-0.0418202	Sensitive	0.0418202	macromolecule metabolic process	BP
GO:0043174	0	1	0.274909	0.682202	-33.2193	Sensitive	33.2193	nucleoside salvage	BP
GO:0043207	1	0	1	1	33.2193	Resistant	33.2193	response to external biotic stimulus	BP
GO:0043211	1	0	1	1	33.2193	Resistant	33.2193	ABC-type carbohydrate transporter activity	MF
GO:0043226	15	8	0.481	0.903086	0.906891	Resistant	0.906891	organelle	CC
GO:0043227	1	0	1	1	33.2193	Resistant	33.2193	membrane-bounded organelle	CC
GO:0043228	14	8	0.343298	0.777073	0.807355	Resistant	0.807355	non-membrane-bounded organelle	CC
GO:0043229	15	8	0.481	0.903086	0.906891	Resistant	0.906891	intracellular organelle	CC
GO:0043231	1	0	1	1	33.2193	Resistant	33.2193	intracellular membrane-bounded organelle	CC
GO:0043232	14	8	0.343298	0.777073	0.807355	Resistant	0.807355	intracellular non-membrane-bounded organelle	CC
GO:0043412	9	11	0.00985305	0.220964	-0.289507	Sensitive	0.289507	macromolecule modification	BP
GO:0043414	5	4	0.269787	0.682202	0.321928	Resistant	0.321928	macromolecule methylation	BP
GO:0043418	1	0	1	1	33.2193	Resistant	33.2193	homocysteine catabolic process	BP
GO:0043436	23	8	1	1	1.52356	Resistant	1.52356	oxoacid metabolic process	BP
GO:0043455	1	0	1	1	33.2193	Resistant	33.2193	regulation of secondary metabolic process	BP
GO:0043456	1	0	1	1	33.2193	Resistant	33.2193	regulation of pentose-phosphate shunt	BP
GO:0043470	1	0	1	1	33.2193	Resistant	33.2193	regulation of carbohydrate catabolic process	BP
GO:0043532	1	0	1	1	33.2193	Resistant	33.2193	angiostatin binding	MF
GO:0043565	2	1	1	1	1	Resistant	1	sequence-specific DNA binding	MF
GO:0043590	2	2	0.304295	0.703246	0	Equal	0	bacterial nucleoid	CC
GO:0043603	13	10	0.0995147	0.682202	0.378512	Resistant	0.378512	amide metabolic process	BP
GO:0043604	12	9	0.138416	0.682202	0.415037	Resistant	0.415037	amide biosynthetic process	BP
GO:0043610	1	0	1	1	33.2193	Resistant	33.2193	regulation of carbohydrate utilization	BP
GO:0043628	0	1	0.274909	0.682202	-33.2193	Sensitive	33.2193	regulatory ncRNA 3'-end processing	BP
GO:0043647	1	0	1	1	33.2193	Resistant	33.2193	inositol phosphate metabolic process	BP
GO:0043648	2	1	1	1	1	Resistant	1	dicarboxylic acid metabolic process	BP
GO:0043650	1	1	0.474347	0.89713	0	Equal	0	dicarboxylic acid biosynthetic process	BP
GO:0043686	0	1	0.274909	0.682202	-33.2193	Sensitive	33.2193	co-translational protein modification	BP
GO:0043933	3	2	0.619705	1	0.584963	Resistant	0.584963	protein-containing complex organization	BP
GO:0043934	0	1	0.274909	0.682202	-33.2193	Sensitive	33.2193	sporulation	BP
GO:0043937	1	0	1	1	33.2193	Resistant	33.2193	regulation of sporulation	BP
GO:0044003	1	0	1	1	33.2193	Resistant	33.2193	symbiont-mediated perturbation of host process	BP
GO:0044036	2	2	0.304295	0.703246	0	Equal	0	cell wall macromolecule metabolic process	BP
GO:0044038	2	2	0.304295	0.703246	0	Equal	0	cell wall macromolecule biosynthetic process	BP
GO:0044042	1	3	0.0657683	0.557287	-1.58496	Sensitive	1.58496	glucan metabolic process	BP
GO:0044068	1	0	1	1	33.2193	Resistant	33.2193	symbiont-mediated perturbation of host cellular process	BP
GO:0044085	14	10	0.164231	0.682202	0.485427	Resistant	0.485427	cellular component biogenesis	BP
GO:0044093	1	0	1	1	33.2193	Resistant	33.2193	positive regulation of molecular function	BP
GO:0044237	71	56	3.27305e-05	0.00660612	0.342392	Resistant	0.342392	cellular metabolic process	BP
GO:0044238	69	54	6.02758e-05	0.00715798	0.353637	Resistant	0.353637	primary metabolic process	BP
GO:0044248	9	5	0.548694	1	0.847997	Resistant	0.847997	cellular catabolic process	BP
GO:0044249	43	34	0.00156307	0.072803	0.338802	Resistant	0.338802	cellular biosynthetic process	BP
GO:0044255	1	2	0.185031	0.682202	-1	Sensitive	1	cellular lipid metabolic process	BP
GO:0044272	1	0	1	1	33.2193	Resistant	33.2193	sulfur compound biosynthetic process	BP
GO:0044273	1	0	1	1	33.2193	Resistant	33.2193	sulfur compound catabolic process	BP
GO:0044281	39	22	0.144481	0.682202	0.825971	Resistant	0.825971	small molecule metabolic process	BP
GO:0044282	2	0	1	1	34.2193	Resistant	34.2193	small molecule catabolic process	BP
GO:0044283	24	9	1	1	1.41504	Resistant	1.41504	small molecule biosynthetic process	BP
GO:0044391	12	6	0.598339	1	1	Resistant	1	ribosomal subunit	CC
GO:0044403	2	0	1	1	34.2193	Resistant	34.2193	biological process involved in symbiotic interaction	BP
GO:0044406	1	0	1	1	33.2193	Resistant	33.2193	adhesion of symbiont to host	BP
GO:0044419	2	0	1	1	34.2193	Resistant	34.2193	biological process involved in interspecies interaction between organisms	BP
GO:0044650	1	0	1	1	33.2193	Resistant	33.2193	adhesion of symbiont to host cell	BP
GO:0044651	1	0	1	1	33.2193	Resistant	33.2193	adhesion of symbiont to host epithelial cell	BP
GO:0044877	2	0	1	1	34.2193	Resistant	34.2193	protein-containing complex binding	MF
GO:0045727	1	0	1	1	33.2193	Resistant	33.2193	positive regulation of translation	BP
GO:0045761	1	0	1	1	33.2193	Resistant	33.2193	regulation of adenylate cyclase activity	BP
GO:0045762	1	0	1	1	33.2193	Resistant	33.2193	positive regulation of adenylate cyclase activity	BP
GO:0045862	1	0	1	1	33.2193	Resistant	33.2193	positive regulation of proteolysis	BP
GO:0045892	3	2	0.619705	1	0.584963	Resistant	0.584963	negative regulation of DNA-templated transcription	BP
GO:0045893	2	1	1	1	1	Resistant	1	positive regulation of DNA-templated transcription	BP
GO:0045900	1	0	1	1	33.2193	Resistant	33.2193	negative regulation of translational elongation	BP
GO:0045903	1	0	1	1	33.2193	Resistant	33.2193	positive regulation of translational fidelity	BP
GO:0045934	3	3	0.355329	0.78666	0	Equal	0	negative regulation of nucleobase-containing compound metabolic process	BP
GO:0045935	2	1	1	1	1	Resistant	1	positive regulation of nucleobase-containing compound metabolic process	BP
GO:0046031	2	2	0.304295	0.703246	0	Equal	0	ADP metabolic process	BP
GO:0046034	2	2	0.304295	0.703246	0	Equal	0	ATP metabolic process	BP
GO:0046037	2	1	1	1	1	Resistant	1	GMP metabolic process	BP
GO:0046039	0	1	0.274909	0.682202	-33.2193	Sensitive	33.2193	GTP metabolic process	BP
GO:0046049	0	1	0.274909	0.682202	-33.2193	Sensitive	33.2193	UMP metabolic process	BP
GO:0046070	1	0	1	1	33.2193	Resistant	33.2193	dGTP metabolic process	BP
GO:0046072	0	1	0.274909	0.682202	-33.2193	Sensitive	33.2193	dTDP metabolic process	BP
GO:0046075	0	1	0.274909	0.682202	-33.2193	Sensitive	33.2193	dTTP metabolic process	BP
GO:0046077	0	1	0.274909	0.682202	-33.2193	Sensitive	33.2193	dUDP metabolic process	BP
GO:0046083	0	1	0.274909	0.682202	-33.2193	Sensitive	33.2193	adenine metabolic process	BP
GO:0046084	0	1	0.274909	0.682202	-33.2193	Sensitive	33.2193	adenine biosynthetic process	BP
GO:0046104	0	1	0.274909	0.682202	-33.2193	Sensitive	33.2193	thymidine metabolic process	BP
GO:0046112	2	3	0.131229	0.682202	-0.584963	Sensitive	0.584963	nucleobase biosynthetic process	BP
GO:0046113	2	0	1	1	34.2193	Resistant	34.2193	nucleobase catabolic process	BP
GO:0046116	1	1	0.474347	0.89713	0	Equal	0	queuosine metabolic process	BP
GO:0046125	0	1	0.274909	0.682202	-33.2193	Sensitive	33.2193	pyrimidine deoxyribonucleoside metabolic process	BP
GO:0046128	2	3	0.131229	0.682202	-0.584963	Sensitive	0.584963	purine ribonucleoside metabolic process	BP
GO:0046129	1	2	0.185031	0.682202	-1	Sensitive	1	purine ribonucleoside biosynthetic process	BP
GO:0046131	0	1	0.274909	0.682202	-33.2193	Sensitive	33.2193	pyrimidine ribonucleoside metabolic process	BP
GO:0046132	0	1	0.274909	0.682202	-33.2193	Sensitive	33.2193	pyrimidine ribonucleoside biosynthetic process	BP
GO:0046134	0	1	0.274909	0.682202	-33.2193	Sensitive	33.2193	pyrimidine nucleoside biosynthetic process	BP
GO:0046148	0	1	0.274909	0.682202	-33.2193	Sensitive	33.2193	pigment biosynthetic process	BP
GO:0046164	1	0	1	1	33.2193	Resistant	33.2193	alcohol catabolic process	BP
GO:0046174	1	0	1	1	33.2193	Resistant	33.2193	polyol catabolic process	BP
GO:0046219	1	0	1	1	33.2193	Resistant	33.2193	indolalkylamine biosynthetic process	BP
GO:0046364	1	0	1	1	33.2193	Resistant	33.2193	monosaccharide biosynthetic process	BP
GO:0046385	0	1	0.274909	0.682202	-33.2193	Sensitive	33.2193	deoxyribose phosphate biosynthetic process	BP
GO:0046386	1	0	1	1	33.2193	Resistant	33.2193	deoxyribose phosphate catabolic process	BP
GO:0046390	6	9	0.00806798	0.191575	-0.584963	Sensitive	0.584963	ribose phosphate biosynthetic process	BP
GO:0046394	19	5	0.645726	1	1.926	Resistant	1.926	carboxylic acid biosynthetic process	BP
GO:0046395	1	0	1	1	33.2193	Resistant	33.2193	carboxylic acid catabolic process	BP
GO:0046417	1	1	0.474347	0.89713	0	Equal	0	chorismate metabolic process	BP
GO:0046434	6	2	1	1	1.58496	Resistant	1.58496	organophosphate catabolic process	BP
GO:0046451	1	0	1	1	33.2193	Resistant	33.2193	diaminopimelate metabolic process	BP
GO:0046496	2	3	0.131229	0.682202	-0.584963	Sensitive	0.584963	nicotinamide nucleotide metabolic process	BP
GO:0046527	0	1	0.274909	0.682202	-33.2193	Sensitive	33.2193	glucosyltransferase activity	MF
GO:0046538	1	0	1	1	33.2193	Resistant	33.2193	2,3-bisphosphoglycerate-dependent phosphoglycerate mutase activity	MF
GO:0046653	1	1	0.474347	0.89713	0	Equal	0	tetrahydrofolate metabolic process	BP
GO:0046677	1	0	1	1	33.2193	Resistant	33.2193	response to antibiotic	BP
GO:0046710	1	0	1	1	33.2193	Resistant	33.2193	GDP metabolic process	BP
GO:0046835	2	3	0.131229	0.682202	-0.584963	Sensitive	0.584963	carbohydrate phosphorylation	BP
GO:0046872	3	0	0.566027	1	34.8042	Resistant	34.8042	metal ion binding	MF
GO:0046914	1	0	1	1	33.2193	Resistant	33.2193	transition metal ion binding	MF
GO:0046940	1	1	0.474347	0.89713	0	Equal	0	nucleoside monophosphate phosphorylation	BP
GO:0047429	1	0	1	1	33.2193	Resistant	33.2193	nucleoside triphosphate diphosphatase activity	MF
GO:0047661	0	1	0.274909	0.682202	-33.2193	Sensitive	33.2193	amino-acid racemase activity	MF
GO:0048518	5	3	0.691876	1	0.736966	Resistant	0.736966	positive regulation of biological process	BP
GO:0048519	6	3	0.71279	1	1	Resistant	1	negative regulation of biological process	BP
GO:0048522	5	3	0.691876	1	0.736966	Resistant	0.736966	positive regulation of cellular process	BP
GO:0048523	4	3	0.401596	0.870004	0.415037	Resistant	0.415037	negative regulation of cellular process	BP
GO:0048583	1	0	1	1	33.2193	Resistant	33.2193	regulation of response to stimulus	BP
GO:0048585	1	0	1	1	33.2193	Resistant	33.2193	negative regulation of response to stimulus	BP
GO:0048646	0	1	0.274909	0.682202	-33.2193	Sensitive	33.2193	anatomical structure formation involved in morphogenesis	BP
GO:0048856	0	1	0.274909	0.682202	-33.2193	Sensitive	33.2193	anatomical structure development	BP
GO:0048869	0	1	0.274909	0.682202	-33.2193	Sensitive	33.2193	cellular developmental process	BP
GO:0050145	1	1	0.474347	0.89713	0	Equal	0	nucleoside monophosphate kinase activity	MF
GO:0050518	0	1	0.274909	0.682202	-33.2193	Sensitive	33.2193	2-C-methyl-D-erythritol 4-phosphate cytidylyltransferase activity	MF
GO:0050661	1	0	1	1	33.2193	Resistant	33.2193	NADP binding	MF
GO:0050667	1	0	1	1	33.2193	Resistant	33.2193	homocysteine metabolic process	BP
GO:0050708	1	0	1	1	33.2193	Resistant	33.2193	regulation of protein secretion	BP
GO:0050714	1	0	1	1	33.2193	Resistant	33.2193	positive regulation of protein secretion	BP
GO:0050789	17	4	0.469142	0.89713	2.08746	Resistant	2.08746	regulation of biological process	BP
GO:0050790	1	2	0.185031	0.682202	-1	Sensitive	1	regulation of catalytic activity	BP
GO:0050793	3	0	0.566027	1	34.8042	Resistant	34.8042	regulation of developmental process	BP
GO:0050794	14	4	0.792992	1	1.80735	Resistant	1.80735	regulation of cellular process	BP
GO:0050818	1	0	1	1	33.2193	Resistant	33.2193	regulation of coagulation	BP
GO:0050819	1	0	1	1	33.2193	Resistant	33.2193	negative regulation of coagulation	BP
GO:0050878	1	0	1	1	33.2193	Resistant	33.2193	regulation of body fluid levels	BP
GO:0050896	11	9	0.083241	0.607258	0.289507	Resistant	0.289507	response to stimulus	BP
GO:0051046	1	0	1	1	33.2193	Resistant	33.2193	regulation of secretion	BP
GO:0051047	1	0	1	1	33.2193	Resistant	33.2193	positive regulation of secretion	BP
GO:0051049	1	0	1	1	33.2193	Resistant	33.2193	regulation of transport	BP
GO:0051050	1	0	1	1	33.2193	Resistant	33.2193	positive regulation of transport	BP
GO:0051052	0	1	0.274909	0.682202	-33.2193	Sensitive	33.2193	regulation of DNA metabolic process	BP
GO:0051053	0	1	0.274909	0.682202	-33.2193	Sensitive	33.2193	negative regulation of DNA metabolic process	BP
GO:0051082	0	1	0.274909	0.682202	-33.2193	Sensitive	33.2193	unfolded protein binding	MF
GO:0051128	2	0	1	1	34.2193	Resistant	34.2193	regulation of cellular component organization	BP
GO:0051156	2	1	1	1	1	Resistant	1	glucose 6-phosphate metabolic process	BP
GO:0051174	1	0	1	1	33.2193	Resistant	33.2193	regulation of phosphorus metabolic process	BP
GO:0051179	6	5	0.186735	0.682202	0.263034	Resistant	0.263034	localization	BP
GO:0051180	1	1	0.474347	0.89713	0	Equal	0	vitamin transport	BP
GO:0051222	1	0	1	1	33.2193	Resistant	33.2193	positive regulation of protein transport	BP
GO:0051223	1	0	1	1	33.2193	Resistant	33.2193	regulation of protein transport	BP
GO:0051234	6	5	0.186735	0.682202	0.263034	Resistant	0.263034	establishment of localization	BP
GO:0051239	2	0	1	1	34.2193	Resistant	34.2193	regulation of multicellular organismal process	BP
GO:0051240	1	0	1	1	33.2193	Resistant	33.2193	positive regulation of multicellular organismal process	BP
GO:0051241	1	0	1	1	33.2193	Resistant	33.2193	negative regulation of multicellular organismal process	BP
GO:0051246	3	0	0.566027	1	34.8042	Resistant	34.8042	regulation of protein metabolic process	BP
GO:0051247	2	0	1	1	34.2193	Resistant	34.2193	positive regulation of protein metabolic process	BP
GO:0051248	1	0	1	1	33.2193	Resistant	33.2193	negative regulation of protein metabolic process	BP
GO:0051252	6	2	1	1	1.58496	Resistant	1.58496	regulation of RNA metabolic process	BP
GO:0051253	3	2	0.619705	1	0.584963	Resistant	0.584963	negative regulation of RNA metabolic process	BP
GO:0051254	2	1	1	1	1	Resistant	1	positive regulation of RNA metabolic process	BP
GO:0051276	3	1	1	1	1.58496	Resistant	1.58496	chromosome organization	BP
GO:0051287	0	2	0.0754708	0.557287	-34.2193	Sensitive	34.2193	NAD binding	MF
GO:0051301	2	1	1	1	1	Resistant	1	cell division	BP
GO:0051302	0	2	0.0754708	0.557287	-34.2193	Sensitive	34.2193	regulation of cell division	BP
GO:0051339	1	0	1	1	33.2193	Resistant	33.2193	regulation of lyase activity	BP
GO:0051349	1	0	1	1	33.2193	Resistant	33.2193	positive regulation of lyase activity	BP
GO:0051499	1	1	0.474347	0.89713	0	Equal	0	D-aminoacyl-tRNA deacylase activity	MF
GO:0051500	1	1	0.474347	0.89713	0	Equal	0	D-tyrosyl-tRNA(Tyr) deacylase activity	MF
GO:0051604	1	0	1	1	33.2193	Resistant	33.2193	protein maturation	BP
GO:0051701	2	0	1	1	34.2193	Resistant	34.2193	biological process involved in interaction with host	BP
GO:0051707	1	0	1	1	33.2193	Resistant	33.2193	response to other organism	BP
GO:0051716	6	5	0.186735	0.682202	0.263034	Resistant	0.263034	cellular response to stimulus	BP
GO:0051781	0	2	0.0754708	0.557287	-34.2193	Sensitive	34.2193	positive regulation of cell division	BP
GO:0051917	1	0	1	1	33.2193	Resistant	33.2193	regulation of fibrinolysis	BP
GO:0051919	1	0	1	1	33.2193	Resistant	33.2193	positive regulation of fibrinolysis	BP
GO:0052381	0	1	0.274909	0.682202	-33.2193	Sensitive	33.2193	tRNA dimethylallyltransferase activity	MF
GO:0052689	3	2	0.619705	1	0.584963	Resistant	0.584963	carboxylic ester hydrolase activity	MF
GO:0052693	1	0	1	1	33.2193	Resistant	33.2193	epoxyqueuosine reductase activity	MF
GO:0052745	1	0	1	1	33.2193	Resistant	33.2193	inositol phosphate phosphatase activity	MF
GO:0052803	4	0	0.580387	1	35.2193	Resistant	35.2193	imidazole-containing compound metabolic process	BP
GO:0052834	1	0	1	1	33.2193	Resistant	33.2193	inositol monophosphate phosphatase activity	MF
GO:0052875	1	0	1	1	33.2193	Resistant	33.2193	riboflavin reductase (NAD(P)H) activity	MF
GO:0055085	6	5	0.186735	0.682202	0.263034	Resistant	0.263034	transmembrane transport	BP
GO:0055086	15	16	0.00407298	0.117438	-0.0931094	Sensitive	0.0931094	nucleobase-containing small molecule metabolic process	BP
GO:0060187	1	0	1	1	33.2193	Resistant	33.2193	cell pole	CC
GO:0060255	11	3	0.769468	1	1.87447	Resistant	1.87447	regulation of macromolecule metabolic process	BP
GO:0060589	0	2	0.0754708	0.557287	-34.2193	Sensitive	34.2193	nucleoside-triphosphatase regulator activity	MF
GO:0060590	0	1	0.274909	0.682202	-33.2193	Sensitive	33.2193	ATPase regulator activity	MF
GO:0061041	1	0	1	1	33.2193	Resistant	33.2193	regulation of wound healing	BP
GO:0061045	1	0	1	1	33.2193	Resistant	33.2193	negative regulation of wound healing	BP
GO:0061615	0	1	0.274909	0.682202	-33.2193	Sensitive	33.2193	glycolytic process through fructose-6-phosphate	BP
GO:0061640	0	1	0.274909	0.682202	-33.2193	Sensitive	33.2193	cytoskeleton-dependent cytokinesis	BP
GO:0061783	1	0	1	1	33.2193	Resistant	33.2193	peptidoglycan muralytic activity	MF
GO:0062012	1	0	1	1	33.2193	Resistant	33.2193	regulation of small molecule metabolic process	BP
GO:0065003	3	2	0.619705	1	0.584963	Resistant	0.584963	protein-containing complex assembly	BP
GO:0065007	19	7	1	1	1.44057	Resistant	1.44057	biological regulation	BP
GO:0065008	5	1	1	1	2.32193	Resistant	2.32193	regulation of biological quality	BP
GO:0065009	1	2	0.185031	0.682202	-1	Sensitive	1	regulation of molecular function	BP
GO:0070008	1	0	1	1	33.2193	Resistant	33.2193	serine-type exopeptidase activity	MF
GO:0070042	0	1	0.274909	0.682202	-33.2193	Sensitive	33.2193	rRNA (uridine-N3-)-methyltransferase activity	MF
GO:0070043	3	0	0.566027	1	34.8042	Resistant	34.8042	rRNA (guanine-N7-)-methyltransferase activity	MF
GO:0070181	1	0	1	1	33.2193	Resistant	33.2193	small ribosomal subunit rRNA binding	MF
GO:0070201	1	0	1	1	33.2193	Resistant	33.2193	regulation of establishment of protein localization	BP
GO:0070279	0	1	0.274909	0.682202	-33.2193	Sensitive	33.2193	vitamin B6 binding	MF
GO:0070403	0	1	0.274909	0.682202	-33.2193	Sensitive	33.2193	NAD+ binding	MF
GO:0070475	5	2	1	1	1.32193	Resistant	1.32193	rRNA base methylation	BP
GO:0070476	3	0	0.566027	1	34.8042	Resistant	34.8042	rRNA (guanine-N7)-methylation	BP
GO:0070525	1	2	0.185031	0.682202	-1	Sensitive	1	tRNA threonylcarbamoyladenosine metabolic process	BP
GO:0070567	0	1	0.274909	0.682202	-33.2193	Sensitive	33.2193	cytidylyltransferase activity	MF
GO:0070569	0	1	0.274909	0.682202	-33.2193	Sensitive	33.2193	uridylyltransferase activity	MF
GO:0070613	1	0	1	1	33.2193	Resistant	33.2193	regulation of protein processing	BP
GO:0070925	3	2	0.619705	1	0.584963	Resistant	0.584963	organelle assembly	BP
GO:0070930	0	1	0.274909	0.682202	-33.2193	Sensitive	33.2193	trans-translation-dependent protein tagging	BP
GO:0071103	3	1	1	1	1.58496	Resistant	1.58496	DNA conformation change	BP
GO:0071424	1	1	0.474347	0.89713	0	Equal	0	rRNA (cytosine-N4-)-methyltransferase activity	MF
GO:0071545	1	0	1	1	33.2193	Resistant	33.2193	inositol phosphate catabolic process	BP
GO:0071554	4	2	0.669191	1	1	Resistant	1	cell wall organization or biogenesis	BP
GO:0071617	1	0	1	1	33.2193	Resistant	33.2193	lysophospholipid acyltransferase activity	MF
GO:0071705	2	2	0.304295	0.703246	0	Equal	0	nitrogen compound transport	BP
GO:0071826	3	1	1	1	1.58496	Resistant	1.58496	protein-RNA complex organization	BP
GO:0071840	17	11	0.198659	0.682202	0.628031	Resistant	0.628031	cellular component organization or biogenesis	BP
GO:0071897	2	1	1	1	1	Resistant	1	DNA biosynthetic process	BP
GO:0071941	5	0	0.331263	0.752643	35.5412	Resistant	35.5412	nitrogen cycle metabolic process	BP
GO:0071944	21	12	0.243599	0.682202	0.807355	Resistant	0.807355	cell periphery	CC
GO:0072330	2	2	0.304295	0.703246	0	Equal	0	monocarboxylic acid biosynthetic process	BP
GO:0072337	0	1	0.274909	0.682202	-33.2193	Sensitive	33.2193	modified amino acid transport	BP
GO:0072349	0	1	0.274909	0.682202	-33.2193	Sensitive	33.2193	modified amino acid transmembrane transporter activity	MF
GO:0072350	1	0	1	1	33.2193	Resistant	33.2193	tricarboxylic acid metabolic process	BP
GO:0072488	0	1	0.274909	0.682202	-33.2193	Sensitive	33.2193	ammonium transmembrane transport	BP
GO:0072521	8	8	0.0514581	0.557287	0	Equal	0	purine-containing compound metabolic process	BP
GO:0072522	4	7	0.0129229	0.260826	-0.807355	Sensitive	0.807355	purine-containing compound biosynthetic process	BP
GO:0072523	3	0	0.566027	1	34.8042	Resistant	34.8042	purine-containing compound catabolic process	BP
GO:0072524	2	3	0.131229	0.682202	-0.584963	Sensitive	0.584963	pyridine-containing compound metabolic process	BP
GO:0072525	2	3	0.131229	0.682202	-0.584963	Sensitive	0.584963	pyridine-containing compound biosynthetic process	BP
GO:0072527	4	6	0.030964	0.421319	-0.584963	Sensitive	0.584963	pyrimidine-containing compound metabolic process	BP
GO:0072528	4	5	0.0705094	0.557287	-0.321928	Sensitive	0.321928	pyrimidine-containing compound biosynthetic process	BP
GO:0072530	1	0	1	1	33.2193	Resistant	33.2193	purine-containing compound transmembrane transport	BP
GO:0075136	1	0	1	1	33.2193	Resistant	33.2193	response to host	BP
GO:0075139	1	0	1	1	33.2193	Resistant	33.2193	response to host iron concentration	BP
GO:0080090	10	3	1	1	1.73697	Resistant	1.73697	regulation of primary metabolic process	BP
GO:0080134	1	0	1	1	33.2193	Resistant	33.2193	regulation of response to stress	BP
GO:0090087	1	0	1	1	33.2193	Resistant	33.2193	regulation of peptide transport	BP
GO:0090304	19	23	0.000169124	0.0146292	-0.275634	Sensitive	0.275634	nucleic acid metabolic process	BP
GO:0090329	0	1	0.274909	0.682202	-33.2193	Sensitive	33.2193	regulation of DNA-templated DNA replication	BP
GO:0090407	8	13	0.000941671	0.054303	-0.70044	Sensitive	0.70044	organophosphate biosynthetic process	BP
GO:0090482	1	1	0.474347	0.89713	0	Equal	0	vitamin transmembrane transporter activity	MF
GO:0090529	0	1	0.274909	0.682202	-33.2193	Sensitive	33.2193	cell septum assembly	BP
GO:0090563	1	0	1	1	33.2193	Resistant	33.2193	protein-phosphocysteine-sugar phosphotransferase activity	MF
GO:0097159	14	11	0.0721129	0.557287	0.347923	Resistant	0.347923	organic cyclic compound binding	MF
GO:0097367	3	3	0.355329	0.78666	0	Equal	0	carbohydrate derivative binding	MF
GO:0097506	1	0	1	1	33.2193	Resistant	33.2193	deaminated base DNA N-glycosylase activity	MF
GO:0097510	1	0	1	1	33.2193	Resistant	33.2193	base-excision repair, AP site formation via deaminated base removal	BP
GO:0098552	1	0	1	1	33.2193	Resistant	33.2193	side of membrane	CC
GO:0098562	1	0	1	1	33.2193	Resistant	33.2193	cytoplasmic side of membrane	CC
GO:0098630	0	1	0.274909	0.682202	-33.2193	Sensitive	33.2193	aggregation of unicellular organisms	BP
GO:0098655	0	1	0.274909	0.682202	-33.2193	Sensitive	33.2193	monoatomic cation transmembrane transport	BP
GO:0098656	1	2	0.185031	0.682202	-1	Sensitive	1	monoatomic anion transmembrane transport	BP
GO:0098660	0	1	0.274909	0.682202	-33.2193	Sensitive	33.2193	inorganic ion transmembrane transport	BP
GO:0098661	0	1	0.274909	0.682202	-33.2193	Sensitive	33.2193	inorganic anion transmembrane transport	BP
GO:0098743	0	1	0.274909	0.682202	-33.2193	Sensitive	33.2193	cell aggregation	BP
GO:0098772	0	2	0.0754708	0.557287	-34.2193	Sensitive	34.2193	molecular function regulator activity	MF
GO:0106074	1	1	0.474347	0.89713	0	Equal	0	aminoacyl-tRNA metabolism involved in translational fidelity	BP
GO:0140096	6	0	0.196927	0.682202	35.8042	Resistant	35.8042	catalytic activity, acting on a protein	MF
GO:0140097	5	1	1	1	2.32193	Resistant	2.32193	catalytic activity, acting on DNA	MF
GO:0140098	10	11	0.0233798	0.393236	-0.137504	Sensitive	0.137504	catalytic activity, acting on RNA	MF
GO:0140101	4	6	0.030964	0.421319	-0.584963	Sensitive	0.584963	catalytic activity, acting on a tRNA	MF
GO:0140102	5	2	1	1	1.32193	Resistant	1.32193	catalytic activity, acting on a rRNA	MF
GO:0140110	2	1	1	1	1	Resistant	1	transcription regulator activity	MF
GO:1900046	1	0	1	1	33.2193	Resistant	33.2193	regulation of hemostasis	BP
GO:1900047	1	0	1	1	33.2193	Resistant	33.2193	negative regulation of hemostasis	BP
GO:1901068	2	3	0.131229	0.682202	-0.584963	Sensitive	0.584963	guanosine-containing compound metabolic process	BP
GO:1901070	1	2	0.185031	0.682202	-1	Sensitive	1	guanosine-containing compound biosynthetic process	BP
GO:1901135	14	17	0.00165239	0.0741126	-0.280108	Sensitive	0.280108	carbohydrate derivative metabolic process	BP
GO:1901136	2	0	1	1	34.2193	Resistant	34.2193	carbohydrate derivative catabolic process	BP
GO:1901137	9	13	0.00254204	0.0873573	-0.530515	Sensitive	0.530515	carbohydrate derivative biosynthetic process	BP
GO:1901265	4	5	0.0705094	0.557287	-0.321928	Sensitive	0.321928	nucleoside phosphate binding	MF
GO:1901292	5	2	1	1	1.32193	Resistant	1.32193	nucleoside phosphate catabolic process	BP
GO:1901293	7	12	0.0011616	0.0611605	-0.777608	Sensitive	0.777608	nucleoside phosphate biosynthetic process	BP
GO:1901363	14	11	0.0721129	0.557287	0.347923	Resistant	0.347923	heterocyclic compound binding	MF
GO:1901605	17	1	0.0343307	0.461939	4.08746	Resistant	4.08746	alpha-amino acid metabolic process	BP
GO:1901606	1	0	1	1	33.2193	Resistant	33.2193	alpha-amino acid catabolic process	BP
GO:1901607	14	1	0.0830756	0.607258	3.80735	Resistant	3.80735	alpha-amino acid biosynthetic process	BP
GO:1901615	3	0	0.566027	1	34.8042	Resistant	34.8042	organic hydroxy compound metabolic process	BP
GO:1901616	1	0	1	1	33.2193	Resistant	33.2193	organic hydroxy compound catabolic process	BP
GO:1901657	3	6	0.0160703	0.313889	-1	Sensitive	1	glycosyl compound metabolic process	BP
GO:1901659	2	4	0.0520279	0.557287	-1	Sensitive	1	glycosyl compound biosynthetic process	BP
GO:1902031	1	0	1	1	33.2193	Resistant	33.2193	regulation of NADP metabolic process	BP
GO:1902410	0	1	0.274909	0.682202	-33.2193	Sensitive	33.2193	mitotic cytokinetic process	BP
GO:1902494	2	0	1	1	34.2193	Resistant	34.2193	catalytic complex	CC
GO:1902679	3	2	0.619705	1	0.584963	Resistant	0.584963	negative regulation of RNA biosynthetic process	BP
GO:1902680	2	1	1	1	1	Resistant	1	positive regulation of RNA biosynthetic process	BP
GO:1903034	1	0	1	1	33.2193	Resistant	33.2193	regulation of response to wounding	BP
GO:1903035	1	0	1	1	33.2193	Resistant	33.2193	negative regulation of response to wounding	BP
GO:1903047	0	1	0.274909	0.682202	-33.2193	Sensitive	33.2193	mitotic cell cycle process	BP
GO:1903317	1	0	1	1	33.2193	Resistant	33.2193	regulation of protein maturation	BP
GO:1903319	1	0	1	1	33.2193	Resistant	33.2193	positive regulation of protein maturation	BP
GO:1903424	0	1	0.274909	0.682202	-33.2193	Sensitive	33.2193	fluoride transmembrane transport	BP
GO:1903425	0	1	0.274909	0.682202	-33.2193	Sensitive	33.2193	fluoride transmembrane transporter activity	MF
GO:1903509	0	1	0.274909	0.682202	-33.2193	Sensitive	33.2193	liposaccharide metabolic process	BP
GO:1903530	1	0	1	1	33.2193	Resistant	33.2193	regulation of secretion by cell	BP
GO:1903532	1	0	1	1	33.2193	Resistant	33.2193	positive regulation of secretion by cell	BP
GO:1904823	1	0	1	1	33.2193	Resistant	33.2193	purine nucleobase transmembrane transport	BP
GO:1904951	1	0	1	1	33.2193	Resistant	33.2193	positive regulation of establishment of protein localization	BP
GO:1990234	1	0	1	1	33.2193	Resistant	33.2193	transferase complex	CC
GO:1990391	0	1	0.274909	0.682202	-33.2193	Sensitive	33.2193	DNA repair complex	CC
GO:1990481	0	1	0.274909	0.682202	-33.2193	Sensitive	33.2193	mRNA pseudouridine synthesis	BP
GO:1990837	2	1	1	1	1	Resistant	1	sequence-specific double-stranded DNA binding	MF
GO:1990904	12	6	0.598339	1	1	Resistant	1	ribonucleoprotein complex	CC
GO:2000104	0	1	0.274909	0.682202	-33.2193	Sensitive	33.2193	negative regulation of DNA-templated DNA replication	BP
GO:2001065	2	3	0.131229	0.682202	-0.584963	Sensitive	0.584963	mannan binding	MF
GO:2001141	6	2	1	1	1.58496	Resistant	1.58496	regulation of RNA biosynthetic process	BP
